# Supplementary material for: A New Insight for the Identification of Oncogenic Variants in Breast and Prostate Cancers in Diverse Human Populations, With a Focus on Latinos
Source: Front Pharmacol. 2021 Apr 12;12:630658. doi: 10.3389/fphar.2021.630658 (PMC8072346; doi:10.3389/fphar.2021.630658)
Supplement: Supplementary file 1 [file datasheet1.xlsx]

## Sheet: ST1
Supplementary Table 1. BRCA and PRCA cancer driver genes from intOGEn
BREAST (BRCA) = 99	ONCOGENES	TUMOR SUPRESSOR GENES	KINOME GENES	CELL CYCLE GENES	DNA REPAIR GENES	RNA BINDING PROTEINS	CANCER IMMUNOTHERAPY GENES
ABL2	1	0	1	0	0	0	0
AFF3	1	0	0	0	0	0	0
AKT1	1	0	1	0	0	0	0
ALK	1	0	1	0	0	0	0
ARHGEF12	0	1	0	0	0	0	0
ARID1A	0	1	0	0	0	0	0
ARID1B	0	1	0	0	0	0	0
ASXL1	0	1	0	0	0	0	0
ATM	0	1	1	0	1	0	0
BAP1	0	1	0	0	0	0	0
BRAF	1	0	1	0	0	0	1
BRCA1	0	1	0	1	1	0	0
BRCA2	0	1	0	0	1	0	0
CACNA1D	1	0	0	0	0	0	0
CASP8	0	1	0	0	0	0	1
CBFB	0	1	0	0	0	0	0
CDH1	0	1	0	0	0	0	0
CDKN1B	0	1	0	1	0	0	0
CDKN2A	0	1	0	0	0	1	0
CLTC	0	1	0	0	0	1	0
CREBBP	0	0	0	0	0	0	0
CTCF	0	1	0	0	0	0	1
CUX1	0	0	0	0	0	0	1
DDX3X	0	1	0	0	0	1	0
EGFR	1	0	1	0	0	0	0
ELN	0	0	0	0	0	0	0
EPAS1	0	0	0	0	0	0	0
EPHA3	0	0	1	0	0	0	1
ERBB2	1	0	1	0	0	0	0
ERBB3	1	0	1	0	0	0	0
ERBB4	0	0	1	0	0	0	0
ESR1	0	0	0	0	0	0	0
ETV5	1	0	0	1	0	0	0
FAT1	0	1	0	0	0	0	0
FAT3	0	0	0	0	0	0	0
FAT4	0	1	0	0	0	0	0
FBXW7	0	1	0	0	0	0	0
FGFR2	1	0	1	0	0	0	0
FOXA1	1	0	0	0	0	0	0
GATA1	0	0	0	0	0	0	0
GATA3	0	0	0	0	0	0	0
GNAS	1	0	0	0	0	0	0
GRIN2A	0	1	0	0	0	0	0
HIST1H3B	1	0	0	0	0	0	0
HOXC13	1	0	0	0	0	0	0
HOXD13	1	0	0	0	0	0	0
HRAS	1	0	0	0	0	0	0
HSP90AA1	0	0	0	0	0	1	0
JAK2	1	0	1	0	0	0	1
KAT6B	0	1	0	0	0	0	0
KDM6A	0	0	0	0	0	0	0
KLF4	0	0	0	0	0	0	0
KMT2C	0	1	0	0	0	1	0
KMT2D	0	0	0	0	0	0	0
KRAS	1	0	0	0	0	0	0
LRP1B	0	1	0	0	0	0	0
MAP2K4	0	0	1	0	0	0	0
MAP3K1	0	0	1	0	0	0	0
MAX	0	1	0	0	0	0	0
MDM4	1	0	0	0	0	0	0
MEN1	0	1	0	0	0	0	0
MTOR	1	0	0	0	0	0	0
MYH11	0	0	0	0	0	0	0
MYH9	0	1	0	0	0	1	1
MYO5A	0	0	0	0	0	1	0
NCOA1	0	0	0	0	0	0	0
NCOR1	0	1	0	0	0	0	0
NCOR2	0	1	0	0	0	0	0
NF1	0	1	0	0	0	0	0
NIN	0	0	0	0	0	0	0
NONO	0	0	0	0	0	1	0
NOTCH2	0	0	0	0	0	0	0
NTRK1	0	0	0	0	0	0	0
NUMA1	0	0	0	0	0	0	0
PDGFRB	1	0	1	0	0	0	0
PIK3CA	1	0	0	0	0	0	0
PIK3R1	0	1	0	0	0	0	0
PLAG1	1	0	0	0	0	0	0
POLD1	0	1	0	0	1	0	0
PREX2	1	0	0	0	0	0	0
PTEN	0	1	0	0	0	0	0
PTPN13	0	1	0	0	0	0	0
PTPRD	0	1	0	0	0	0	0
RB1	0	1	0	0	0	0	0
RGS7	0	0	0	1	0	0	0
RHPN2	0	0	0	0	0	0	0
RUNX1	0	0	0	0	0	0	0
SALL4	1	0	0	0	0	0	0
SF3B1	1	0	0	0	0	1	1
SMAD2	0	1	0	0	0	0	0
SMAD4	0	1	0	0	0	0	0
SMARCD1	0	1	0	0	0	0	0
SPEN	0	1	0	0	0	1	0
TBX3	0	0	0	0	0	0	0
TP53	0	0	0	0	0	0	0
USP6	1	0	0	0	0	0	0
ZBTB16	0	1	0	0	0	0	0
ZFHX3	0	1	0	0	0	0	1
ZXDB	0	0	0	0	0	0	0
PROSTATE (PRAD) = 82	ONCOGENES	TUMOR SUPRESSOR GENES	KINOME GENES	CELL CYCLE GENES	DNA REPAIR GENES	RNA BINDING PROTEINS	CANCER IMMUNOTHERAPY GENES
AKT1	1	0	1	0	0	0	0
AKT3	1	0	1	0	0	0	1
ALK	1	0	1	0	0	0	0
APC	0	1	0	0	0	0	0
AR	1	0	0	0	0	0	0
ARID1A	0	1	0	0	0	0	0
ASXL1	0	1	0	0	0	0	0
ATM	0	1	1	0	1	0	0
BRAF	1	0	1	0	0	0	1
BRCA2	0	1	0	0	1	0	0
BRD4	1	0	1	1	0	0	1
CASZ1	0	0	0	0	0	0	0
CDK12	0	1	0	0	0	0	0
CDKN1B	0	1	0	1	0	0	0
CNOT3	0	1	0	0	0	0	0
CTNNB1	1	0	0	0	0	0	0
CUL3	0	1	0	0	0	0	0
DCAF12L2	0	0	0	0	0	0	0
DNMT3A	0	0	0	0	0	0	0
EHD2	0	0	0	0	0	0	0
EIF1AX	0	0	0	0	0	1	1
EPHA3	0	0	1	0	0	0	1
EPS15	0	1	0	0	0	0	0
ERBB3	1	0	1	0	0	0	0
ERG	1	0	0	0	0	0	0
FAM174B	0	0	0	0	0	0	0
FAT1	0	1	0	0	0	0	0
FAT3	0	0	0	0	0	0	0
FAT4	0	1	0	0	0	0	0
FGFR1	1	0	1	0	0	0	0
FOXA1	1	0	0	0	0	0	0
FOXP1	1	0	0	0	0	0	0
HRAS	1	0	0	0	0	0	0
IDH1	1	0	0	0	0	1	0
JAK1	0	0	1	0	0	0	1
KAT6A	1	0	0	0	0	0	0
KAT6B	0	1	0	0	0	0	0
KDM6A	0	0	0	0	0	0	0
KMT2A	1	0	0	0	0	0	0
KMT2C	0	1	0	0	0	1	0
KMT2D	0	0	0	0	0	0	0
KRAS	1	0	0	0	0	0	0
LRP1B	0	1	0	0	0	0	0
LZTR1	0	1	0	0	0	0	0
MECOM	1	0	0	0	0	0	0
MED12	0	0	0	0	0	0	1
MYH11	0	0	0	0	0	0	0
NCOR1	0	1	0	0	0	0	0
NCOR2	0	1	0	0	0	0	0
NOTCH2	0	0	0	0	0	0	0
NRAS	1	0	0	0	0	0	0
PIK3CA	1	0	0	0	0	0	0
PIK3CB	1	0	0	0	0	0	0
PMS2	0	1	0	0	1	0	0
PRDM1	0	1	0	0	0	0	0
PREX2	1	0	0	0	0	0	0
PTEN	0	1	0	0	0	0	0
PTPRD	0	1	0	0	0	0	0
RANBP2	0	1	0	0	0	1	0
RB1	0	1	0	0	0	0	0
RBFOX1	0	0	0	0	0	0	0
RHOA	0	0	0	0	0	0	0
RNF213	0	0	0	0	0	0	0
RNF43	0	1	0	0	0	0	0
RUNX1T1	0	0	0	0	0	0	1
SETD2	0	1	0	0	0	0	0
SF3B1	1	0	0	0	0	1	1
SMAD4	0	1	0	0	0	0	0
SMARCA1	0	0	0	0	0	0	0
SOX21	0	1	0	0	0	0	0
SPEN	0	1	0	0	0	1	0
SPOP	0	0	0	0	0	0	0
STRN	0	0	0	0	0	0	0
SUZ12	0	0	0	0	0	0	0
TP53	0	0	0	0	0	0	0
TRIM24	0	0	0	0	0	0	0
U2AF1	1	0	0	0	0	1	1
USP6	1	0	0	0	0	0	0
XPO1	1	0	0	1	0	0	0
ZBTB16	0	1	0	0	0	0	0
ZFHX3	0	1	0	0	0	0	1
ZNF429	0	0	0	0	0	0	0

## Sheet: ST2
Supplementary Table 2. Known and predicted oncogenic variants and CADD phred scores in breast cancer
cadd_phred	cadd_phred (Category)	cancer	cdna	consequence	default_id	driver	driver_mut_prediction	exon	gdna	gdna_orig	gene	gene_role	protein	protein_change	protein_pos	strand	transcript	transcript_aminoacids	transcript_exons
59	Very high	BRCA	c.12691G>T	Nonsense	1268	predicted	TIER 1	83	chr2:g.141072618C>A	chr2:g.141072618C>A	LRP1B	LoF	p.E4231*	E/*	4231	-	ENST00000389484	4600.0	91
59	Very high	BRCA	c.13069G>T	Nonsense	1115	predicted	TIER 1	85	chr2:g.141032066C>A	chr2:g.141032066C>A	LRP1B	LoF	p.E4357*	E/*	4357	-	ENST00000389484	4600.0	91
59	Very high	BRCA	c.13118_13123delAAGACA	InFrameDeletion	1099	predicted	TIER 2	85	chr2:g.141032013_141032018delGTCTTT	chr2:g.141032011CTGTCTT>C	LRP1B	LoF	p.K4373_D4374delKD	KD/-	4373	-	ENST00000389484	4600.0	91
58	Very high	BRCA	c.12871G>T	Nonsense	2770	predicted	TIER 1	16	chr4:g.126408554G>T	chr4:g.126408554G>T	FAT4	LoF	p.E4291*	E/*	4291	+	ENST00000394329	4982.0	17
58	Very high	BRCA	c.10162G>T	Nonsense	2467	predicted	TIER 1	64	chr2:g.141202144C>A	chr2:g.141202144C>A	LRP1B	LoF	p.E3388*	E/*	3388	-	ENST00000389484	4600.0	91
58	Very high	BRCA	c.12381_12392dupTATATATGGAGC	InFrameInsertion	1420	predicted	TIER 2	81	chr2:g.141081584_141081595dupGCTCCATATATA	chr2:g.141081583T>TGCTCCATATATA	LRP1B	LoF	p.I4128_A4131dupIYGA	-/IYGA	4128	-	ENST00000389484	4600.0	91
58	Very high	BRCA	c.12446_12454dupAGTACTTAG	InFrameInsertion	1399	predicted	TIER 2	81	chr2:g.141081525_141081533dupAGTACTCTA	chr2:g.141081521G>GCTAAGTACT	LRP1B	LoF	p.E4149_L4151dupEYL	-/EYL	4149	-	ENST00000389484	4600.0	91
58	Very high	BRCA	c.10097_10100delAAGA	Frameshift	2338	predicted	TIER 2	15	chr11:g.92569742_92569745delAAGA	chr11:g.92569741GAAGA>G	FAT3	ambiguous	p.E3366Vfs*2	E/.	3366	+	ENST00000298047	4590.0	27
58	Very high	BRCA	c.14491_14498delAAGAAGGG	Frameshift	37	predicted	TIER 1	46	chr12:g.49421809_49421816delCCCTTCTT	chr12:g.49421808CCCCTTCTT>C	MLL2	LoF	p.K4831Gfs*3	K/.	4831	-	ENST00000301067	5538.0	54
57	Very high	BRCA	c.8683G>T	Nonsense	118	predicted	TIER 1	60	chr11:g.108224504G>T	chr11:g.108224504G>T	ATM	LoF	p.E2895*	E/*	2895	+	ENST00000278616	3057.0	63
57	Very high	BRCA	c.10722_10725delAGAG	Frameshift	2011	predicted	TIER 1	9	chr4:g.126372893_126372896delAGAG	chr4:g.126372890CAGAG>C	FAT4	LoF	p.R3574Sfs*31	R/.	3574	+	ENST00000394329	4982.0	17
57	Very high	BRCA	c.12380_12409delTCAGTAGCCACAGAATCAACCCGGGTTTGG	InFrameDeletion	4812	predicted	TIER 2	49	chr7:g.151849915_151849944delGGGTTGATTCTGTGGCTACTGACCAAACCC	chr7:g.151849906TCCAAACCCGGGTTGATTCTGTGGCTACTGA>T	MLL3	LoF	p.V4127_L4136delVSSHRINPGL	VSSHRINPGL/-	4127	-	ENST00000262189	4912.0	59
57	Very high	BRCA	c.14168_14169insTAA	InFrameInsertion	4278	predicted	TIER 2	54	chr7:g.151842243_151842244insTTA	chr7:g.151842243C>CTTA	MLL3	LoF	p.V4723_L4724insK	-/K	4723	-	ENST00000262189	4912.0	59
57	Very high	BRCA	c.8527C>T	Nonsense	3179	predicted	TIER 1	54	chr2:g.141260667G>A	chr2:g.141260667G>A	LRP1B	LoF	p.R2843*	R/*	2843	-	ENST00000389484	4600.0	91
56	Very high	BRCA	c.8748_8750dupCCT	InFrameInsertion	2964	predicted	TIER 2	21	chr13:g.32950922_32950924dupCCT	chr13:g.32950921A>ACCT	BRCA2	LoF	p.L2917dupL	-/L	2917	+	ENST00000380152	3419.0	27
56	Very high	BRCA	c.8249_8251delAGA	InFrameDeletion	2713	predicted	TIER 2	18	chr13:g.32937588_32937590delAGA	chr13:g.32937584CAGA>C	BRCA2	LoF	p.K2750delK	K/-	2750	+	ENST00000380152	3419.0	27
56	Very high	BRCA	c.13619_13620insAAA	InFrameInsertion	3009	predicted	TIER 2	17	chr4:g.126411596_126411597insAAA	chr4:g.126411595G>GAAA	FAT4	LoF	p.K4542dupK	-/K	4542	+	ENST00000394329	4982.0	17
56	Very high	BRCA	c.11053_11069delAGCAATGATGGAGTTCA	Frameshift	2095	predicted	TIER 1	9	chr4:g.126373224_126373240delAGCAATGATGGAGTTCA	chr4:g.126373223TAGCAATGATGGAGTTCA>T	FAT4	LoF	p.S3685Qfs*21	S/.	3685	+	ENST00000394329	4982.0	17
56	Very high	BRCA	c.9177G>A	Nonsense	2845	predicted	TIER 1	58	chr2:g.141245252C>T	chr2:g.141245252C>T	LRP1B	LoF	p.W3059*	W/*	3059	-	ENST00000389484	4600.0	91
56	Very high	BRCA	c.13213C>T	Nonsense	1056	predicted	TIER 1	86	chr2:g.141027845G>A	chr2:g.141027845G>A	LRP1B	LoF	p.Q4405*	Q/*	4405	-	ENST00000389484	4600.0	91
56	Very high	BRCA	c.13406_13408delGAA	InFrameDeletion	880	predicted	TIER 2	88	chr2:g.140997020_140997022delCTT	chr2:g.140997017TTTC>T	LRP1B	LoF	p.R4469delR	R/-	4469	-	ENST00000389484	4600.0	91
56	Very high	BRCA	c.13406_13410delGAAAA	Frameshift	879	predicted	TIER 1	88	chr2:g.140997020_140997024delCTTTT	chr2:g.140997015TTTTTC>T	LRP1B	LoF	p.R4469Kfs*7	R/.	4469	-	ENST00000389484	4600.0	91
56	Very high	BRCA	c.13411delA	Frameshift	878	predicted	TIER 1	88	chr2:g.140997019delT	chr2:g.140997014CT>C	LRP1B	LoF	p.R4471Efs*16	R/.	4471	-	ENST00000389484	4600.0	91
56	Very high	BRCA	c.7027C>T	Nonsense	3488	predicted	TIER 2	45	chr4:g.87728979C>T	chr4:g.87728979C>T	PTPN13	ambiguous	p.R2343*	R/*	2343	+	ENST00000436978	2491.0	48
56	Very high	BRCA	c.12532_12534delAAG	InFrameDeletion	3329	predicted	TIER 2	23	chr11:g.92616154_92616156delAAG	chr11:g.92616150CAAG>C	FAT3	ambiguous	p.K4178delK	K/-	4178	+	ENST00000298047	4590.0	27
56	Very high	BRCA	c.4246_4247dupGA	Frameshift	4802	predicted	TIER 2	35	chr8:g.69069571_69069572dupGA	chr8:g.69069570G>GGA	PREX2	ambiguous	p.G1417Kfs*18	G/.	1417	+	ENST00000288368	1607.0	40
56	Very high	BRCA	c.3692_3712delCTCTTGCTCAGAACATCAGGA	InFrameDeletion	4500	predicted	TIER 2	30	chr8:g.69033252_69033272delCTCTTGCTCAGAACATCAGGA	chr8:g.69033248CGGACTCTTGCTCAGAACATCA>C	PREX2	ambiguous	p.T1231_R1237delTLAQNIR	TLAQNIR/-	1231	+	ENST00000288368	1607.0	40
55	Very high	BRCA	c.8303_8306delAATG	Frameshift	4944	predicted	TIER 1	57	chr11:g.108213983_108213986delAATG	chr11:g.108213980TTGAA>T	ATM	LoF	p.E2768Gfs*37	E/.	2768	+	ENST00000278616	3057.0	63
55	Very high	BRCA	c.8545C>T	Nonsense	17	predicted	TIER 1	58	chr11:g.108216596C>T	chr11:g.108216596C>T	ATM	LoF	p.R2849*	R/*	2849	+	ENST00000278616	3057.0	63
55	Very high	BRCA	c.8537_8538delAG	Frameshift	2850	predicted	TIER 1	20	chr13:g.32945142_32945143delAG	chr13:g.32945137AAG>A	BRCA2	LoF	p.E2846Gfs*22	E/.	2846	+	ENST00000380152	3419.0	27
55	Very high	BRCA	c.14129_14130insAGGGCCCCCAAAG	Frameshift	4284	predicted	TIER 1	54	chr7:g.151842283_151842284insTTTGGGGGCCCTC	chr7:g.151842282A>ACTTTGGGGGCCCT	MLL3	LoF	p.S4711Gfs*6	S/.	4711	-	ENST00000262189	4912.0	59
55	Very high	BRCA	c.12400A>T	Nonsense	1415	predicted	TIER 1	81	chr2:g.141081576T>A	chr2:g.141081576T>A	LRP1B	LoF	p.K4134*	K/*	4134	-	ENST00000389484	4600.0	91
55	Very high	BRCA	c.12415C>T	Nonsense	1413	predicted	TIER 1	81	chr2:g.141081561G>A	chr2:g.141081561G>A	LRP1B	LoF	p.R4139*	R/*	4139	-	ENST00000389484	4600.0	91
55	Very high	BRCA	c.5389_5428delTCCCGAACAGTAAGGCAGTTCCAGTTCACTGACTGGCCAG	Frameshift	3956	predicted	TIER 1	43	chr9:g.8331694_8331733delAGTCAGTGAACTGGAACTGCCTTACTGTTCGGGACTGGCC	chr9:g.8331687TCTGGCCAGTCAGTGAACTGGAACTGCCTTACTGTTCGGGA>T	PTPRD	LoF	p.R1798Kfs*45	R/.	1798	-	ENST00000381196	1913.0	43
55	Very high	BRCA	c.7440_7442delAGA	InFrameDeletion	3695	predicted	TIER 2	48	chr4:g.87735671_87735673delAGA	chr4:g.87735664CAGA>C	PTPN13	ambiguous	p.E2481delE	E/-	2481	+	ENST00000436978	2491.0	48
55	Very high	BRCA	c.6619C>T	Nonsense	3345	predicted	TIER 2	43	chr4:g.87724960C>T	chr4:g.87724960C>T	PTPN13	ambiguous	p.R2207*	R/*	2207	+	ENST00000436978	2491.0	48
55	Very high	BRCA	c.5889_5890insAGTAAGTTC	InFrameInsertion	3965	predicted	TIER 2	20	chr6:g.157528164_157528165insAGTAAGTTC	chr6:g.157528163C>CCAGTAAGTT	ARID1B	LoF	p.A1963_E1964insSKF	-/SKF	1963	+	ENST00000346085	2250.0	20
55	Very high	BRCA	c.11659C>T	Nonsense	11	predicted	TIER 1	22	chr4:g.187521496G>A	chr4:g.187521496G>A	FAT1	LoF	p.Q3887*	Q/*	3887	-	ENST00000441802	4589.0	27
55	Very high	BRCA	c.13144C>T	Nonsense	3582	predicted	TIER 2	26	chr11:g.92623054C>T	chr11:g.92623054C>T	FAT3	ambiguous	p.R4382*	R/*	4382	+	ENST00000298047	4590.0	27
55	Very high	BRCA	c.10480_10482delGAG	InFrameDeletion	2504	predicted	TIER 2	17	chr11:g.92573839_92573841delGAG	chr11:g.92573832AGAG>A	FAT3	ambiguous	p.E3494delE	E/-	3494	+	ENST00000298047	4590.0	27
55	Very high	BRCA	c.9731_9736dupTTCAGA	InFrameInsertion	800	predicted	TIER 2	42	chr7:g.151864245_151864250dupTCTGAA	chr7:g.151864244T>TTCTGAA	MLL3	LoF	p.Q3245_K3246insIQ	-/IQ	3245	-	ENST00000262189	4912.0	59
55	Very high	BRCA	c.14147_14149delGGG	InFrameDeletion	200	predicted	TIER 2	44	chr12:g.49422948_49422950delCCC	chr12:g.49422945TCCC>T	MLL2	LoF	p.G4716delG	G/-	4716	-	ENST00000301067	5538.0	54
55	Very high	BRCA	c.3965C>A	Nonsense	4641	predicted	TIER 2	32	chr8:g.69046492C>A	chr8:g.69046492C>A	PREX2	ambiguous	p.S1322*	S/*	1322	+	ENST00000288368	1607.0	40
54	Very high	BRCA	c.8266A>T	Nonsense	4901	known	TIER 1	56	chr11:g.108206686A>T	chr11:g.108206686A>T	ATM	LoF	p.K2756*	K/*	2756	+	ENST00000278616	3057.0	63
54	Very high	BRCA	c.8284C>T	Nonsense	4939	predicted	TIER 1	57	chr11:g.108213964C>T	chr11:g.108213964C>T	ATM	LoF	p.Q2762*	Q/*	2762	+	ENST00000278616	3057.0	63
54	Very high	BRCA	c.8281_8284delTCTC	Frameshift	4935	predicted	TIER 1	57	chr11:g.108213961_108213964delTCTC	chr11:g.108213957CCTCT>C	ATM	LoF	p.Q2762Efs*43	Q/.	2762	+	ENST00000278616	3057.0	63
54	Very high	BRCA	c.8264_8268delATAAG	SpliceDonorDeletion	4899	predicted	TIER 1	56	chr11:g.108206684_108206688delATAAG	chr11:g.108206683TATAAG>T	ATM	LoF	.	./.	.	+	ENST00000278616	3057.0	63
54	Very high	BRCA	c.8248_8268delTTAACTATCTGTACTTATAAG	SpliceDonorDeletion	4892	predicted	TIER 1	56	chr11:g.108206668_108206688delTTAACTATCTGTACTTATAAG	chr11:g.108206667ATTAACTATCTGTACTTATAAG>A	ATM	LoF	.	./.	.	+	ENST00000278616	3057.0	63
54	Very high	BRCA	c.5136G>A	Nonsense	2888	known	TIER 1	17	chr17:g.41215907C>T	chr17:g.41215907C>T	BRCA1	LoF	p.W1712*	W/*	1712	-	ENST00000357654	1864.0	23
54	Very high	BRCA	c.5137delG	Frameshift	2886	predicted	TIER 1	17	chr17:g.41215908delC	chr17:g.41215905AC>A	BRCA1	LoF	p.V1713*fs*1	V/.	1713	-	ENST00000357654	1864.0	23
54	Very high	BRCA	c.8638G>T	Nonsense	76	predicted	TIER 1	59	chr11:g.108218059G>T	chr11:g.108218059G>T	ATM	LoF	p.E2880*	E/*	2880	+	ENST00000278616	3057.0	63
54	Very high	BRCA	c.9382C>T	Nonsense	3243	known	TIER 1	25	chr13:g.32968951C>T	chr13:g.32968951C>T	BRCA2	LoF	p.R3128*	R/*	3128	+	ENST00000380152	3419.0	27
54	Very high	BRCA	c.7933A>T	Nonsense	2583	predicted	TIER 1	17	chr13:g.32936787A>T	chr13:g.32936787A>T	BRCA2	LoF	p.R2645*	R/*	2645	+	ENST00000380152	3419.0	27
54	Very high	BRCA	c.9040G>T	Nonsense	2917	predicted	TIER 1	57	chr2:g.141250257C>A	chr2:g.141250257C>A	LRP1B	LoF	p.E3014*	E/*	3014	-	ENST00000389484	4600.0	91
54	Very high	BRCA	c.10444C>T	Nonsense	2307	predicted	TIER 1	67	chr2:g.141143549G>A	chr2:g.141143549G>A	LRP1B	LoF	p.Q3482*	Q/*	3482	-	ENST00000389484	4600.0	91
54	Very high	BRCA	c.7343_7345delAAG	InFrameDeletion	700	predicted	TIER 2	50	chr17:g.29677222_29677224delAAG	chr17:g.29677217TGAA>T	NF1	LoF	p.E2448delE	E/-	2448	+	ENST00000358273	2840.0	58
54	Very high	BRCA	c.7260_7265delAGGGAC	InFrameDeletion	3598	predicted	TIER 2	46	chr4:g.87731083_87731088delAGGGAC	chr4:g.87731081TCAGGGA>T	PTPN13	ambiguous	p.G2421_T2422delGT	GT/-	2421	+	ENST00000436978	2491.0	48
54	Very high	BRCA	c.12534_12548delGGTCTTCCGCAAGAA	InFrameDeletion	3326	predicted	TIER 2	23	chr11:g.92616156_92616170delGGTCTTCCGCAAGAA	chr11:g.92616141AGTCTTCCGCAAGAAG>A	FAT3	ambiguous	p.K4178_K4182delKVFRK	KVFRK/-	4178	+	ENST00000298047	4590.0	27
54	Very high	BRCA	c.12316delG	Frameshift	3251	predicted	TIER 2	23	chr11:g.92615938delG	chr11:g.92615936AG>A	FAT3	ambiguous	p.E4106Sfs*9	E/.	4106	+	ENST00000298047	4590.0	27
54	Very high	BRCA	c.11568_11570delAGA	InFrameDeletion	2955	predicted	TIER 2	20	chr11:g.92592398_92592400delAGA	chr11:g.92592393AAAG>A	FAT3	ambiguous	p.E3857delE	E/-	3857	+	ENST00000298047	4590.0	27
54	Very high	BRCA	c.16047delC	Frameshift	4574	predicted	TIER 1	50	chr12:g.49418366delG	chr12:g.49418365TG>T	MLL2	LoF	p.Y5349*fs*1	Y/.	5349	-	ENST00000301067	5538.0	54
54	Very high	BRCA	c.3583C>T	Nonsense	4444	predicted	TIER 2	29	chr8:g.69032509C>T	chr8:g.69032509C>T	PREX2	ambiguous	p.R1195*	R/*	1195	+	ENST00000288368	1607.0	40
53	Very high	BRCA	c.5932G>T	Nonsense	3799	known	TIER 1	40	chr11:g.108183151G>T	chr11:g.108183151G>T	ATM	LoF	p.E1978*	E/*	1978	+	ENST00000278616	3057.0	63
53	Very high	BRCA	c.5260G>T	Nonsense	2815	known	TIER 1	19	chr17:g.41209086C>A	chr17:g.41209086C>A	BRCA1	LoF	p.E1754*	E/*	1754	-	ENST00000357654	1864.0	23
53	Very high	BRCA	c.9486_9488delGAA	MultiAAMissense	3274	predicted	TIER 1	25	chr13:g.32969055_32969057delGAA	chr13:g.32969054TGAA>T	BRCA2	LoF	p.M3162_K3163delinsI	insI/-	3162	+	ENST00000380152	3419.0	27
53	Very high	BRCA	c.7708_7716delAAGGAAAGT	InFrameDeletion	2506	predicted	TIER 2	16	chr13:g.32931969_32931977delAAGGAAAGT	chr13:g.32931966GGTAAGGAAA>G	BRCA2	LoF	p.K2570_S2572delKES	KES/-	2570	+	ENST00000380152	3419.0	27
53	Very high	BRCA	c.8137G>T	Nonsense	3435	predicted	TIER 1	50	chr2:g.141274470C>A	chr2:g.141274470C>A	LRP1B	LoF	p.E2713*	E/*	2713	-	ENST00000389484	4600.0	91
53	Very high	BRCA	c.9163G>T	Nonsense	2849	predicted	TIER 1	58	chr2:g.141245266C>A	chr2:g.141245266C>A	LRP1B	LoF	p.E3055*	E/*	3055	-	ENST00000389484	4600.0	91
53	Very high	BRCA	c.9791_9792dupAT	Frameshift	2599	predicted	TIER 1	61	chr2:g.141215055_141215056dupTA	chr2:g.141215053G>GAT	LRP1B	LoF	p.H3265Ifs*15	H/.	3265	-	ENST00000389484	4600.0	91
53	Very high	BRCA	c.11719_11721delTAC	InFrameDeletion	1714	predicted	TIER 2	77	chr2:g.141108539_141108541delAGT	chr2:g.141108536TGTA>T	LRP1B	LoF	p.Y3907delY	Y/-	3907	-	ENST00000389484	4600.0	91
53	Very high	BRCA	c.10993C>T	Nonsense	287	predicted	TIER 1	19	chr4:g.187524687G>A	chr4:g.187524687G>A	FAT1	LoF	p.R3665*	R/*	3665	-	ENST00000441802	4589.0	27
53	Very high	BRCA	c.8908C>T	Nonsense	1923	predicted	TIER 2	10	chr11:g.92538330C>T	chr11:g.92538330C>T	FAT3	ambiguous	p.R2970*	R/*	2970	+	ENST00000298047	4590.0	27
53	Very high	BRCA	c.11616_11618delAGA	InFrameDeletion	191	predicted	TIER 2	44	chr7:g.151856002_151856004delTTC	chr7:g.151855999CTCT>C	MLL3	LoF	p.E3874delE	E/-	3874	-	ENST00000262189	4912.0	59
53	Very high	BRCA	c.15700G>T	Nonsense	4695	predicted	TIER 1	48	chr12:g.49420049C>A	chr12:g.49420049C>A	MLL2	LoF	p.E5234*	E/*	5234	-	ENST00000301067	5538.0	54
53	Very high	BRCA	c.1657G>T	Nonsense	3549	predicted	TIER 2	16	chr8:g.68992692G>T	chr8:g.68992692G>T	PREX2	ambiguous	p.E553*	E/*	553	+	ENST00000288368	1607.0	40
52	Very high	BRCA	c.9127G>T	Nonsense	3143	known	TIER 1	24	chr13:g.32954153G>T	chr13:g.32954153G>T	BRCA2	LoF	p.E3043*	E/*	3043	+	ENST00000380152	3419.0	27
52	Very high	BRCA	c.8575delC	Frameshift	2865	predicted	TIER 1	20	chr13:g.32945180delC	chr13:g.32945179AC>A	BRCA2	LoF	p.Q2859Kfs*4	Q/.	2859	+	ENST00000380152	3419.0	27
52	Very high	BRCA	c.6859_6863delAGAAA	Frameshift	2148	predicted	TIER 1	12	chr13:g.32918712_32918716delAGAAA	chr13:g.32918708CAAAAG>C	BRCA2	LoF	p.R2287Lfs*4	R/.	2287	+	ENST00000380152	3419.0	27
52	Very high	BRCA	c.3224_3226dupGGA	InFrameInsertion	3000	predicted	TIER 2	22	chrX:g.44941974_44941976dupGGA	chrX:g.44941964G>GGGA	KDM6A	LoF	p.R1075dupR	-/R	1075	+	ENST00000377967	1402.0	29
52	Very high	BRCA	c.5720C>G	Nonsense	4602	predicted	TIER 1	35	chr2:g.141526820G>C	chr2:g.141526820G>C	LRP1B	LoF	p.S1907*	S/*	1907	-	ENST00000389484	4600.0	91
52	Very high	BRCA	c.8050G>T	Nonsense	3459	predicted	TIER 1	50	chr2:g.141274557C>A	chr2:g.141274557C>A	LRP1B	LoF	p.E2684*	E/*	2684	-	ENST00000389484	4600.0	91
52	Very high	BRCA	c.5239_5241dupCGT	InFrameInsertion	4121	predicted	TIER 2	41	chr9:g.8340355_8340357dupACG	chr9:g.8340354C>CACG	PTPRD	LoF	p.R1747dupR	-/R	1747	-	ENST00000381196	1913.0	43
52	Very high	BRCA	c.5366_5368delAAG	SpliceAcceptorDeletion	2809	predicted	TIER 2	33	chr4:g.87695527_87695529delAAG	chr4:g.87695525GGAA>G	PTPN13	ambiguous	.	./.	.	+	ENST00000436978	2491.0	48
52	Very high	BRCA	c.4915G>T	Nonsense	2655	predicted	TIER 2	31	chr4:g.87692420G>T	chr4:g.87692420G>T	PTPN13	ambiguous	p.E1639*	E/*	1639	+	ENST00000436978	2491.0	48
52	Very high	BRCA	c.3802_3822dupGATGTGATGGGCAGGATGCCC	InFrameInsertion	3260	predicted	TIER 2	15	chr6:g.157511284_157511304dupGATGTGATGGGCAGGATGCCC	chr6:g.157511277C>CATGCCCGATGTGATGGGCAGG	ARID1B	LoF	p.D1268_P1274dupDVMGRMP	-/DVMGRMP	1268	+	ENST00000346085	2250.0	20
51	Very high	BRCA	c.8185C>T	Nonsense	4876	known	TIER 1	56	chr11:g.108206605C>T	chr11:g.108206605C>T	ATM	LoF	p.Q2729*	Q/*	2729	+	ENST00000278616	3057.0	63
51	Very high	BRCA	c.8307G>A	Nonsense	4946	predicted	TIER 1	57	chr11:g.108213987G>A	chr11:g.108213987G>A	ATM	LoF	p.W2769*	W/*	2769	+	ENST00000278616	3057.0	63
51	Very high	BRCA	c.8005_8007delAGA	InFrameDeletion	2634	predicted	TIER 2	18	chr13:g.32937344_32937346delAGA	chr13:g.32937340CAGA>C	BRCA2	LoF	p.R2669delR	R/-	2669	+	ENST00000380152	3419.0	27
51	Very high	BRCA	c.7058_7078delGGCCCCAGTCCCAGCCTCCAC	InFrameDeletion	2047	predicted	TIER 2	31	chr16:g.3777976_3777996delGCTGGGACTGGGGCCGTGGAG	chr16:g.3777969TGTGGAGGCTGGGACTGGGGCC>T	CREBBP	LoF	p.R2353_P2359delRPQSQPP	RPQSQPP/-	2353	-	ENST00000262367	2443.0	31
51	Very high	BRCA	c.12886C>T	Nonsense	4546	predicted	TIER 1	25	chr4:g.187517808G>A	chr4:g.187517808G>A	FAT1	LoF	p.R4296*	R/*	4296	-	ENST00000441802	4589.0	27
51	Very high	BRCA	c.13610_13627delTGTCTGTGTACGCCTCCA	InFrameDeletion	4081	predicted	TIER 2	27	chr4:g.187509889_187509906delAGGCGTACACAGACATGG	chr4:g.187509885GTGGAGGCGTACACAGACA>G	FAT1	LoF	p.M4537_S4542delMSVYAS	MSVYAS/-	4537	-	ENST00000441802	4589.0	27
51	Very high	BRCA	c.10213A>T	Nonsense	2422	predicted	TIER 1	65	chr2:g.141201980T>A	chr2:g.141201980T>A	LRP1B	LoF	p.K3405*	K/*	3405	-	ENST00000389484	4600.0	91
51	Very high	BRCA	c.4564C>T	Nonsense	2515	predicted	TIER 2	29	chr4:g.87690981C>T	chr4:g.87690981C>T	PTPN13	ambiguous	p.R1522*	R/*	1522	+	ENST00000436978	2491.0	48
51	Very high	BRCA	c.2463_2477delACCAACAAAAATGAC	InFrameDeletion	3374	predicted	TIER 2	23	chr13:g.49039478_49039492delACCAACAAAAATGAC	chr13:g.49039475AACACCAACAAAAATG>A	RB1	LoF	p.T823_P827delTKMTP	TKMTP/-	823	+	ENST00000267163	929.0	27
51	Very high	BRCA	c.10672_10674delGAA	InFrameDeletion	394	predicted	TIER 2	19	chr4:g.187525010_187525012delTCT	chr4:g.187525005ATTC>A	FAT1	LoF	p.E3558delE	E/-	3558	-	ENST00000441802	4589.0	27
50	Very high	BRCA	c.7638_7646delTAGAATTTC	InFrameDeletion	4600	predicted	TIER 2	52	chr11:g.108202614_108202622delTAGAATTTC	chr11:g.108202611CTCTAGAATT>C	ATM	LoF	p.R2547_S2549delRIS	RIS/-	2547	+	ENST00000278616	3057.0	63
50	Very high	BRCA	c.8876_8879delACTG	Frameshift	246	predicted	TIER 1	62	chr11:g.108235834_108235837delACTG	chr11:g.108235831TTGAC>T	ATM	LoF	p.D2959Gfs*3	D/.	2959	+	ENST00000278616	3057.0	63
50	Very high	BRCA	c.7480C>T	Nonsense	2408	known	TIER 1	15	chr13:g.32930609C>T	chr13:g.32930609C>T	BRCA2	LoF	p.R2494*	R/*	2494	+	ENST00000380152	3419.0	27
50	Very high	BRCA	c.9286dupG	Frameshift	3212	predicted	TIER 1	25	chr13:g.32968855dupG	chr13:g.32968854C>CG	BRCA2	LoF	p.E3096Gfs*15	E/.	3096	+	ENST00000380152	3419.0	27
50	Very high	BRCA	c.12295A>T	Nonsense	4757	predicted	TIER 1	24	chr4:g.187518909T>A	chr4:g.187518909T>A	FAT1	LoF	p.K4099*	K/*	4099	-	ENST00000441802	4589.0	27
50	Very high	BRCA	c.7013_7014insGAAATTCC	Frameshift	3999	predicted	TIER 1	43	chr2:g.141356380_141356381insGGAATTTC	chr2:g.141356380A>AGGAATTTC	LRP1B	LoF	p.N2338Kfs*11	N/.	2338	-	ENST00000389484	4600.0	91
50	Very high	BRCA	c.3857_3859delAAG	InFrameDeletion	4110	predicted	TIER 2	16	chr5:g.56180528_56180530delAAG	chr5:g.56180521CAAG>C	MAP3K1	LoF	p.E1286delE	E/-	1286	+	ENST00000399503	1513.0	20
50	Very high	BRCA	c.5989_5991delGTT	InFrameDeletion	1082	predicted	TIER 2	38	chr17:g.15961807_15961809delAAC	chr17:g.15961803TAAC>T	NCOR1	LoF	p.V1997delV	V/-	1997	-	ENST00000268712	2441.0	46
50	Very high	BRCA	c.3805C>T	Nonsense	4600	predicted	TIER 2	32	chr8:g.69046332C>T	chr8:g.69046332C>T	PREX2	ambiguous	p.Q1269*	Q/*	1269	+	ENST00000288368	1607.0	40
50	Very high	BRCA	c.1494-1_1498delGAGATA	SpliceAcceptorDeletion	3450	predicted	TIER 2	131414	chr8:g.68984729_68984734delGAGATA	chr8:g.68984725TATAGAG>T	PREX2	ambiguous	.	./.	.	+	ENST00000288368	1607.0	40
50	Very high	BRCA	c.851_853dupACA	InFrameInsertion	3112	predicted	TIER 2	8	chr8:g.68956733_68956735dupACA	chr8:g.68956731G>GAAC	PREX2	ambiguous	p.N284dupN	-/N	284	+	ENST00000288368	1607.0	40
49	Very high	BRCA	c.5080G>T	Nonsense	2908	known	TIER 1	17	chr17:g.41215963C>A	chr17:g.41215963C>A	BRCA1	LoF	p.E1694*	E/*	1694	-	ENST00000357654	1864.0	23
49	Very high	BRCA	c.9139C>T	Nonsense	333	known	passenger	63	chr11:g.108236203C>T	chr11:g.108236203C>T	ATM	LoF	p.R3047*	R/*	3047	+	ENST00000278616	3057.0	63
49	Very high	BRCA	c.6944_6947delTAAA	Frameshift	2196	predicted	TIER 1	13	chr13:g.32920970_32920973delTAAA	chr13:g.32920967CAATA>C	BRCA2	LoF	p.I2315Kfs*12	I/.	2315	+	ENST00000380152	3419.0	27
49	Very high	BRCA	c.6673_6703dupACAGAAGCAGTAGAAATTGCTAAAGCTTTTA	Frameshift	2054	predicted	TIER 1	11	chr13:g.32915165_32915195dupACAGAAGCAGTAGAAATTGCTAAAGCTTTTA	chr13:g.32915163A>AAACAGAAGCAGTAGAAATTGCTAAAGCTTTT	BRCA2	LoF	p.M2235Nfs*8	M/.	2235	+	ENST00000380152	3419.0	27
49	Very high	BRCA	c.1778_1780delAGA	InFrameDeletion	697	predicted	TIER 2	10	chr16:g.67663377_67663379delAGA	chr16:g.67663371CGAA>C	CTCF	LoF	p.K593delK	K/-	593	+	ENST00000264010	728.0	12
49	Very high	BRCA	c.2891_2893delAGA	InFrameDeletion	1458	predicted	TIER 2	17	chr3:g.89528591_89528593delAGA	chr3:g.89528584CAGA>C	EPHA3	ambiguous	p.K964delK	K/-	964	+	ENST00000336596	984.0	17
49	Very high	BRCA	c.13211_13228delAGGTGATTGATGAGCAGA	MultiAAMissense	4218	predicted	TIER 1	27	chr4:g.187510285_187510302delTCTGCTCATCAATCACCT	chr4:g.187510284GTCTGCTCATCAATCACCT>G	FAT1	LoF	p.E4404_T4410delinsA	insA/-	4404	-	ENST00000441802	4589.0	27
49	Very high	BRCA	c.9749C>G	Nonsense	2609	predicted	TIER 1	61	chr2:g.141215097G>C	chr2:g.141215097G>C	LRP1B	LoF	p.S3250*	S/*	3250	-	ENST00000389484	4600.0	91
49	Very high	BRCA	c.3863_3865delTAG	InFrameDeletion	4113	predicted	TIER 2	16	chr5:g.56180534_56180536delTAG	chr5:g.56180528AAGT>A	MAP3K1	LoF	p.V1288delV	V/-	1288	+	ENST00000399503	1513.0	20
49	Very high	BRCA	c.6148G>T	Nonsense	3146	predicted	TIER 2	39	chr4:g.87706398G>T	chr4:g.87706398G>T	PTPN13	ambiguous	p.E2050*	E/*	2050	+	ENST00000436978	2491.0	48
49	Very high	BRCA	c.2288_2289delAG	Frameshift	1581	predicted	TIER 2	15	chr4:g.87656883_87656884delAG	chr4:g.87656880CAG>C	PTPN13	ambiguous	p.E763Vfs*23	E/.	763	+	ENST00000436978	2491.0	48
49	Very high	BRCA	c.1006G>T	Nonsense	3825	predicted	TIER 2	14	chr1:g.240975294C>A	chr1:g.240975294C>A	RGS7	ambiguous	p.E336*	E/*	336	-	ENST00000366565	488.0	18
49	Very high	BRCA	c.10121_10129dupTCGGTCAGC	InFrameInsertion	3640	predicted	TIER 2	12	chr1:g.16263752_16263760dupTCGGTCAGC	chr1:g.16263747C>CCAGCTCGGT	SPEN	ambiguous	p.L3374_Q3376dupLGQ	-/LGQ	3374	+	ENST00000375759	3665.0	15
49	Very high	BRCA	c.8603G>A	Nonsense	1278	predicted	TIER 1	10	chr4:g.187539137C>T	chr4:g.187539137C>T	FAT1	LoF	p.W2868*	W/*	2868	-	ENST00000441802	4589.0	27
49	Very high	BRCA	c.14489_14490insTC	Frameshift	44	predicted	TIER 1	46	chr12:g.49421818_49421819insAG	chr12:g.49421817T>TGA	MLL2	LoF	p.K4831Qfs*28	K/.	4831	-	ENST00000301067	5538.0	54
49	Very high	BRCA	c.3382C>T	Nonsense	4325	predicted	TIER 2	27	chr8:g.69030840C>T	chr8:g.69030840C>T	PREX2	ambiguous	p.Q1128*	Q/*	1128	+	ENST00000288368	1607.0	40
49	Very high	BRCA	c.3121delG	Frameshift	4208	predicted	TIER 2	25	chr8:g.69021833delG	chr8:g.69021831TG>T	PREX2	ambiguous	p.E1041Rfs*7	E/.	1041	+	ENST00000288368	1607.0	40
48	Very high	BRCA	c.7913G>A	Nonsense	4699	known	TIER 1	53	chr11:g.108203613G>A	chr11:g.108203613G>A	ATM	LoF	p.W2638*	W/*	2638	+	ENST00000278616	3057.0	63
48	Very high	BRCA	c.8395_8404delTTTCAGTGCC	Frameshift	4963	predicted	TIER 1	57	chr11:g.108214075_108214084delTTTCAGTGCC	chr11:g.108214064ATTTCAGTGCC>A	ATM	LoF	p.F2799Kfs*4	F/.	2799	+	ENST00000278616	3057.0	63
48	Very high	BRCA	c.7495_7498delGAAG	Frameshift	4499	predicted	TIER 1	50	chr11:g.108201128_108201131delGAAG	chr11:g.108201127TGAAG>T	ATM	LoF	p.E2499Sfs*4	E/.	2499	+	ENST00000278616	3057.0	63
48	Very high	BRCA	c.6529C>T	Nonsense	4121	predicted	TIER 1	45	chr11:g.108192104C>T	chr11:g.108192104C>T	ATM	LoF	p.Q2177*	Q/*	2177	+	ENST00000278616	3057.0	63
48	Very high	BRCA	c.6404_6405insTT	Nonsense	4052	predicted	TIER 1	44	chr11:g.108190737_108190738insTT	chr11:g.108190736C>CTT	ATM	LoF	p.R2136*fs*1	R/.	2136	+	ENST00000278616	3057.0	63
48	Very high	BRCA	c.5445G>A	Nonsense	2663	known	TIER 1	22	chr17:g.41199682C>T	chr17:g.41199682C>T	BRCA1	LoF	p.W1815*	W/*	1815	-	ENST00000357654	1864.0	23
48	Very high	BRCA	c.8814_8824delGAGAAACTCTC	Frameshift	179	predicted	TIER 1	61	chr11:g.108225565_108225575delGAGAAACTCTC	chr11:g.108225564TGAGAAACTCTC>T	ATM	LoF	p.M2938Ifs*14	M/.	2938	+	ENST00000278616	3057.0	63
48	Very high	BRCA	c.492_496delCAAAA	Frameshift	4668	predicted	TIER 1	2	chr12:g.12871775_12871779delCAAAA	chr12:g.12871769TCAAAA>T	CDKN1B	LoF	p.N164Kfs*40	N/.	164	+	ENST00000228872	199.0	3
48	Very high	BRCA	c.1893_1895delCAG	InFrameDeletion	4229	predicted	TIER 2	16	chrX:g.41206688_41206690delCAG	chrX:g.41206682TAGC>T	DDX3X	LoF	p.S631delS	S/-	631	+	ENST00000399959	663.0	17
48	Very high	BRCA	c.2182C>T	Nonsense	1136	predicted	TIER 2	13	chr3:g.89480345C>T	chr3:g.89480345C>T	EPHA3	ambiguous	p.R728*	R/*	728	+	ENST00000336596	984.0	17
48	Very high	BRCA	c.8110C>T	Nonsense	3444	predicted	TIER 1	50	chr2:g.141274497G>A	chr2:g.141274497G>A	LRP1B	LoF	p.Q2704*	Q/*	2704	-	ENST00000389484	4600.0	91
48	Very high	BRCA	c.6973C>T	Nonsense	3472	predicted	TIER 2	45	chr4:g.87728925C>T	chr4:g.87728925C>T	PTPN13	ambiguous	p.Q2325*	Q/*	2325	+	ENST00000436978	2491.0	48
48	Very high	BRCA	c.939_950delCTCTGCAGAACT	InFrameDeletion	761	predicted	TIER 2	8	chr21:g.36171617_36171628delTTCTGCAGAGAG	chr21:g.36171614AAGTTCTGCAGAG>A	RUNX1	ambiguous	p.A315_S318delAELS	AELS/-	315	-	ENST00000437180	481.0	9
48	Very high	BRCA	c.2051_2065delTGGCAGTGGACTCGG	InFrameDeletion	4014	predicted	TIER 2	8	chr12:g.115109818_115109832delTCCACTGCCACCGAG	chr12:g.115109812CCCGAGTCCACTGCCA>C	TBX3	LoF	p.V684_S688delVAVDS	VAVDS/-	684	-	ENST00000257566	744.0	8
48	Very high	BRCA	c.9459_9488delTCTGCCCAGCACAACTGTTCCTTCCCCTGG	InFrameDeletion	4683	predicted	TIER 2	10	chr16:g.72822689_72822718delAGGGGAAGGAACAGTTGTGCTGGGCAGACC	chr16:g.72822686GCCAGGGGAAGGAACAGTTGTGCTGGGCAGA>G	ZFHX3	LoF	p.S3156_P3165delSTTVPSPGLP	STTVPSPGLP/-	3156	-	ENST00000268489	3704.0	10
48	Very high	BRCA	c.9629_9691delCTCCCCCGCCGCCAGCAGCCCAGCCGCCACCCACACCACAGCTCCCACTGCAACAGCAGCAGC	InFrameDeletion	4580	predicted	TIER 2	10	chr16:g.72822492_72822554delTGTTGCAGTGGGAGCTGTGGTGTGGGTGGCGGCTGGGCTGCTGGCGGCGGGGGAGGCTGCTGC	chr16:g.72822483TGCTGCTGCTGTTGCAGTGGGAGCTGTGGTGTGGGTGGCGGCTGGGCTGCTGGCGGCGGGGGAG>T	ZFHX3	LoF	p.P3210_Q3230delPPPPPAAQPPPTPQLPLQQQQ	PPPPPAAQPPPTPQLPLQQQQ/-	3210	-	ENST00000268489	3704.0	10
48	Very high	BRCA	c.6000_6002delTGA	InFrameDeletion	3995	predicted	TIER 2	20	chr6:g.157528275_157528277delTGA	chr6:g.157528272GGAT>G	ARID1B	LoF	p.D2000delD	D/-	2000	+	ENST00000346085	2250.0	20
48	Very high	BRCA	c.5960delA	Frameshift	3978	predicted	TIER 1	20	chr6:g.157528235delA	chr6:g.157528234GA>G	ARID1B	LoF	p.E1987Gfs*34	E/.	1987	+	ENST00000346085	2250.0	20
48	Very high	BRCA	c.8323C>T	Nonsense	1359	predicted	TIER 1	10	chr4:g.187539417G>A	chr4:g.187539417G>A	FAT1	LoF	p.Q2775*	Q/*	2775	-	ENST00000441802	4589.0	27
48	Very high	BRCA	c.3420_3421delAG	SpliceDonorDeletion	4332	predicted	TIER 2	27	chr8:g.69030878_69030879delAG	chr8:g.69030877CAG>C	PREX2	ambiguous	.	./.	.	+	ENST00000288368	1607.0	40
48	Very high	BRCA	c.8356_8357delTC	Frameshift	26	predicted	TIER 1	9	chr16:g.72828227_72828228delAG	chr16:g.72828223TGA>T	ZFHX3	LoF	p.S2786Tfs*4	S/.	2786	-	ENST00000268489	3704.0	10
47	Very high	BRCA	c.3016_3020delGAAGG	Frameshift	486	predicted	TIER 1	13	chr20:g.31023531_31023535delGAAGG	chr20:g.31023530TGAAGG>T	ASXL1	LoF	p.E1006Sfs*8	E/.	1006	+	ENST00000375687	1542.0	13
47	Very high	BRCA	c.7072C>T	Nonsense	4343	predicted	TIER 1	48	chr11:g.108198468C>T	chr11:g.108198468C>T	ATM	LoF	p.Q2358*	Q/*	2358	+	ENST00000278616	3057.0	63
47	Very high	BRCA	c.5979_5983delTAAAG	Frameshift	3811	predicted	TIER 1	40	chr11:g.108183198_108183202delTAAAG	chr11:g.108183193AAAAGT>A	ATM	LoF	p.S1993Rfs*23	S/.	1993	+	ENST00000278616	3057.0	63
47	Very high	BRCA	c.8977C>T	Nonsense	271	known	TIER 1	62	chr11:g.108235935C>T	chr11:g.108235935C>T	ATM	LoF	p.R2993*	R/*	2993	+	ENST00000278616	3057.0	63
47	Very high	BRCA	c.8572C>T	Nonsense	2863	known	TIER 1	20	chr13:g.32945177C>T	chr13:g.32945177C>T	BRCA2	LoF	p.Q2858*	Q/*	2858	+	ENST00000380152	3419.0	27
47	Very high	BRCA	c.6714_6716delTGA	InFrameDeletion	2064	predicted	TIER 2	11	chr13:g.32915206_32915208delTGA	chr13:g.32915200AGAT>A	BRCA2	LoF	p.D2238delD	D/-	2238	+	ENST00000380152	3419.0	27
47	Very high	BRCA	c.1864_1869delAATGAG	InFrameDeletion	748	predicted	TIER 2	11	chr16:g.67670619_67670624delAATGAG	chr16:g.67670618CAATGAG>C	CTCF	LoF	p.N622_E623delNE	NE/-	622	+	ENST00000264010	728.0	12
47	Very high	BRCA	c.3847_3849delGAA	InFrameDeletion	406	predicted	TIER 2	28	chr2:g.212248418_212248420delTTC	chr2:g.212248417ATTC>A	ERBB4	LoF	p.E1283delE	E/-	1283	-	ENST00000342788	1309.0	28
47	Very high	BRCA	c.7018C>T	Nonsense	3997	predicted	TIER 1	43	chr2:g.141356376G>A	chr2:g.141356376G>A	LRP1B	LoF	p.Q2340*	Q/*	2340	-	ENST00000389484	4600.0	91
47	Very high	BRCA	c.3640G>T	Nonsense	4005	predicted	TIER 1	14	chr5:g.56178667G>T	chr5:g.56178667G>T	MAP3K1	LoF	p.E1214*	E/*	1214	+	ENST00000399503	1513.0	20
47	Very high	BRCA	c.3560_3562delAAG	InFrameDeletion	3979	predicted	TIER 2	14	chr5:g.56178587_56178589delAAG	chr5:g.56178576TGAA>T	MAP3K1	LoF	p.E1187delE	E/-	1187	+	ENST00000399503	1513.0	20
47	Very high	BRCA	c.2238_2240delAGA	InFrameDeletion	3302	predicted	TIER 2	22	chr13:g.49039160_49039162delAGA	chr13:g.49039155AAAG>A	RB1	LoF	p.E748delE	E/-	748	+	ENST00000267163	929.0	27
47	Very high	BRCA	c.1113_1118dupCGAGGG	InFrameInsertion	4382	predicted	TIER 2	7	chr12:g.115112623_115112628dupCCTCGC	chr12:g.115112621A>ACCCTCG	TBX3	LoF	p.G373_E374dupGE	-/GE	373	-	ENST00000257566	744.0	8
47	Very high	BRCA	c.9186_9206dupGGAGAAAGAATACTTTGACCC	InFrameInsertion	4815	predicted	TIER 2	9	chr16:g.72827375_72827395dupGGGTCAAAGTATTCTTTCTCC	chr16:g.72827374T>TGGGTCAAAGTATTCTTTCTCC	ZFHX3	LoF	p.E3063_P3069dupEKEYFDP	-/EKEYFDP	3063	-	ENST00000268489	3704.0	10
47	Very high	BRCA	c.9711_9722delTGAGAAAGTAAA	MultiAAMissense	4565	predicted	TIER 1	10	chr16:g.72822453_72822464delTTTACTTTCTCA	chr16:g.72822452CTTTACTTTCTCA>C	ZFHX3	LoF	p.S3237_K3241delinsR	insR/-	3237	-	ENST00000268489	3704.0	10
47	Very high	BRCA	c.9717_9728delAGTAAAGGAGAA	InFrameDeletion	4560	predicted	TIER 2	10	chr16:g.72822452_72822463delCTTTACTTTCTC	chr16:g.72822446CTTCTCCTTTACT>C	ZFHX3	LoF	p.V3240_K3243delVKEK	VKEK/-	3240	-	ENST00000268489	3704.0	10
47	Very high	BRCA	c.10533_10577delTGGCAGTGGCGGCGGCGGCGGCGGTGGCGGCGGCGGCGGCGGCGG	InFrameDeletion	4037	predicted	TIER 2	10	chr16:g.72821613_72821657delCCGCCACCGCCGCCGCCGCCGCCACTGCCACCGCCGCCGCCGCCG	chr16:g.72821597GCCGCCGCCGCCGCCGCCGCCACCGCCGCCGCCGCCGCCACTGCCA>G	ZFHX3	LoF	p.G3514_S3528delGGGGGGGGGGGGGGS	GGGGGGGGGGGGGGS/-	3514	-	ENST00000268489	3704.0	10
47	Very high	BRCA	c.10533_10580delTGGCAGTGGCGGCGGCGGCGGCGGTGGCGGCGGCGGCGGCGGCGGCGG	InFrameDeletion	4031	predicted	TIER 2	10	chr16:g.72821610_72821657delCCGCCGCCACCGCCGCCGCCGCCGCCACTGCCACCGCCGCCGCCGCCG	chr16:g.72821594GCCGCCGCCGCCGCCGCCGCCGCCACCGCCGCCGCCGCCGCCACTGCCA>G	ZFHX3	LoF	p.G3512_G3527delGSGGGGGGGGGGGGGG	GSGGGGGGGGGGGGGG/-	3512	-	ENST00000268489	3704.0	10
47	Very high	BRCA	c.5950_5951insC	Frameshift	3976	predicted	TIER 1	20	chr6:g.157528225_157528226insC	chr6:g.157528225G>GC	ARID1B	LoF	p.E1984Afs*13	E/.	1984	+	ENST00000346085	2250.0	20
47	Very high	BRCA	c.7555C>T	Nonsense	1494	predicted	TIER 2	9	chr11:g.92533734C>T	chr11:g.92533734C>T	FAT3	ambiguous	p.R2519*	R/*	2519	+	ENST00000298047	4590.0	27
47	Very high	BRCA	c.13663_13671delCTGAAACAG	SpliceDonorDeletion	425	predicted	TIER 1	40	chr12:g.49424686_49424694delTGTTTCAGC	chr12:g.49424675CCTGTTTCAG>C	MLL2	LoF	.	./.	.	-	ENST00000301067	5538.0	54
47	Very high	BRCA	c.3324C>G	Nonsense	4288	predicted	TIER 2	26	chr8:g.69028165C>G	chr8:g.69028165C>G	PREX2	ambiguous	p.Y1108*	Y/*	1108	+	ENST00000288368	1607.0	40
46	Very high	BRCA	c.8049_8056dupACAGTCAT	Frameshift	4805	predicted	TIER 1	55	chr11:g.108205734_108205741dupACAGTCAT	chr11:g.108205731T>TATACAGTC	ATM	LoF	p.F2686Yfs*10	F/.	2686	+	ENST00000278616	3057.0	63
46	Very high	BRCA	c.7921C>T	Nonsense	4703	predicted	TIER 1	53	chr11:g.108203621C>T	chr11:g.108203621C>T	ATM	LoF	p.Q2641*	Q/*	2641	+	ENST00000278616	3057.0	63
46	Very high	BRCA	c.7223C>A	Nonsense	4404	predicted	TIER 1	49	chr11:g.108199881C>A	chr11:g.108199881C>A	ATM	LoF	p.S2408*	S/*	2408	+	ENST00000278616	3057.0	63
46	Very high	BRCA	c.9054_9055delTA	Frameshift	3091	predicted	TIER 1	23	chr13:g.32953987_32953988delTA	chr13:g.32953986GTA>G	BRCA2	LoF	p.S3018Rfs*3	S/.	3018	+	ENST00000380152	3419.0	27
46	Very high	BRCA	c.9052_9057delAGTAAA	InFrameDeletion	3090	predicted	TIER 2	23	chr13:g.32953985_32953990delAGTAAA	chr13:g.32953980CTAAAAG>C	BRCA2	LoF	p.K3019_S3020delKS	KS/-	3019	+	ENST00000380152	3419.0	27
46	Very high	BRCA	c.3698_3699insTCATCTTAGTGTTTTGAGATGCT	Frameshift	2664	predicted	TIER 2	23	chr7:g.101882642_101882643insTCATCTTAGTGTTTTGAGATGCT	chr7:g.101882642C>CTCATCTTAGTGTTTTGAGATGCT	CUX1	ambiguous	p.C1234Hfs*30	C/.	1234	+	ENST00000360264	1517.0	24
46	Very high	BRCA	c.1879_1881delGAG	InFrameDeletion	750	predicted	TIER 2	11	chr16:g.67670634_67670636delGAG	chr16:g.67670627TGAG>T	CTCF	LoF	p.E627delE	E/-	627	+	ENST00000264010	728.0	12
46	Very high	BRCA	c.2368_2412dupAGTCCCGGGGAGAACAGCAAGAGCAGGTTCCCCCCACAGTGCTAC	InFrameInsertion	4939	predicted	TIER 2	15	chr2:g.46609644_46609688dupAGTCCCGGGGAGAACAGCAAGAGCAGGTTCCCCCCACAGTGCTAC	chr2:g.46609642T>TCAGTCCCGGGGAGAACAGCAAGAGCAGGTTCCCCCCACAGTGCTA	EPAS1	ambiguous	p.S790_Y804dupSPGENSKSRFPPQCY	-/SPGENSKSRFPPQCY	790	+	ENST00000263734	871.0	16
46	Very high	BRCA	c.11875C>T	Nonsense	4956	predicted	TIER 1	22	chr4:g.187521280G>A	chr4:g.187521280G>A	FAT1	LoF	p.Q3959*	Q/*	3959	-	ENST00000441802	4589.0	27
46	Very high	BRCA	c.2857_2860delATGG	Frameshift	856	predicted	TIER 1	23	chr2:g.212288886_212288889delCCAT	chr2:g.212288885ACCAT>A	ERBB4	LoF	p.M953Sfs*5	M/.	953	-	ENST00000342788	1309.0	28
46	Very high	BRCA	c.3910C>T	Nonsense	3173	predicted	TIER 1	27	chrX:g.44966686C>T	chrX:g.44966686C>T	KDM6A	LoF	p.Q1304*	Q/*	1304	+	ENST00000377967	1402.0	29
46	Very high	BRCA	c.13625_13627delGAG	InFrameDeletion	4458	predicted	TIER 2	52	chr7:g.151845388_151845390delCTC	chr7:g.151845384TCTC>T	MLL3	LoF	p.G4542delG	G/-	4542	-	ENST00000262189	4912.0	59
46	Very high	BRCA	c.1544C>A	Nonsense	1443	predicted	TIER 1	10	chr2:g.141812693G>T	chr2:g.141812693G>T	LRP1B	LoF	p.S515*	S/*	515	-	ENST00000389484	4600.0	91
46	Very high	BRCA	c.4460G>A	Nonsense	138	predicted	TIER 1	27	chr2:g.141625278C>T	chr2:g.141625278C>T	LRP1B	LoF	p.W1487*	W/*	1487	-	ENST00000389484	4600.0	91
46	Very high	BRCA	c.5546_5551dupAAGATG	InFrameInsertion	4912	predicted	TIER 2	31	chr1:g.120462175_120462180dupTTCATC	chr1:g.120462164G>GCATCTT	NOTCH2	ambiguous	p.E1849_D1850dupED	-/ED	1849	-	ENST00000256646	2472.0	34
46	Very high	BRCA	c.2632C>T	Nonsense	1718	predicted	TIER 2	17	chr4:g.87666263C>T	chr4:g.87666263C>T	PTPN13	ambiguous	p.Q878*	Q/*	878	+	ENST00000436978	2491.0	48
46	Very high	BRCA	c.9775_9777delAAG	InFrameDeletion	4540	predicted	TIER 2	10	chr16:g.72822401_72822403delCTT	chr16:g.72822397CCTT>C	ZFHX3	LoF	p.K3259delK	K/-	3259	-	ENST00000268489	3704.0	10
46	Very high	BRCA	c.5229_5237delAGACGAGGA	InFrameDeletion	3778	predicted	TIER 2	20	chr6:g.157527504_157527512delAGACGAGGA	chr6:g.157527495CGACGAGGAA>C	ARID1B	LoF	p.D1747_E1749delDEE	DEE/-	1747	+	ENST00000346085	2250.0	20
46	Very high	BRCA	c.5223_5234delCGAGGAAGACGA	InFrameDeletion	3776	predicted	TIER 2	20	chr6:g.157527498_157527509delCGAGGAAGACGA	chr6:g.157527492TGACGACGAGGAA>T	ARID1B	LoF	p.D1741_D1744delDEED	DEED/-	1741	+	ENST00000346085	2250.0	20
46	Very high	BRCA	c.8620G>T	Nonsense	1270	predicted	TIER 1	10	chr4:g.187539120C>A	chr4:g.187539120C>A	FAT1	LoF	p.E2874*	E/*	2874	-	ENST00000441802	4589.0	27
46	Very high	BRCA	c.4450C>T	Nonsense	4915	predicted	TIER 2	37	chr8:g.69104606C>T	chr8:g.69104606C>T	PREX2	ambiguous	p.R1484*	R/*	1484	+	ENST00000288368	1607.0	40
46	Very high	BRCA	c.2771_2773delAAA	InFrameDeletion	4077	predicted	TIER 2	24	chr8:g.69020399_69020401delAAA	chr8:g.69020397TAAA>T	PREX2	ambiguous	p.K924delK	K/-	924	+	ENST00000288368	1607.0	40
46	Very high	BRCA	c.2170C>T	CdsStopSNV	212	predicted	TIER 1	16	chr5:g.67593424C>T	chr5:g.67593424C>T	PIK3R1	LoF	.	./.	.	+	ENST00000521381	725.0	16
46	Very high	BRCA	c.2329G>T	Nonsense	2006	predicted	TIER 2	19	chr19:g.50917077G>T	chr19:g.50917077G>T	POLD1	ambiguous	p.E777*	E/*	777	+	ENST00000440232	1108.0	27
45	Very high	BRCA	c.7456C>T	Nonsense	4488	known	TIER 1	50	chr11:g.108201089C>T	chr11:g.108201089C>T	ATM	LoF	p.R2486*	R/*	2486	+	ENST00000278616	3057.0	63
45	Very high	BRCA	c.3569_3631dupGGATTGAGGCCACCCAGGCTCCTGGAGCACCCCAAAAGAATTGCAAGGCAGTCCCAAGTTTTG	InFrameInsertion	644	predicted	TIER 2	13	chr20:g.31024084_31024146dupGGATTGAGGCCACCCAGGCTCCTGGAGCACCCCAAAAGAATTGCAAGGCAGTCCCAAGTTTTG	chr20:g.31024083A>AGGATTGAGGCCACCCAGGCTCCTGGAGCACCCCAAAAGAATTGCAAGGCAGTCCCAAGTTTTG	ASXL1	LoF	p.F1210_D1211insGIEATQAPGAPQKNCKAVPSF	-/GIEATQAPGAPQKNCKAVPSF	1210	+	ENST00000375687	1542.0	13
45	Very high	BRCA	c.7777C>T	Nonsense	4628	predicted	TIER 1	52	chr11:g.108202753C>T	chr11:g.108202753C>T	ATM	LoF	p.Q2593*	Q/*	2593	+	ENST00000278616	3057.0	63
45	Very high	BRCA	c.8549T>A	Nonsense	20	known	TIER 1	58	chr11:g.108216600T>A	chr11:g.108216600T>A	ATM	LoF	p.L2850*	L/*	2850	+	ENST00000278616	3057.0	63
45	Very high	BRCA	c.5539_5540insCCTGCTGTCCTGGCACTG	MultiAAMissense	2604	predicted	TIER 1	23	chr17:g.41197747_41197748insCAGTGCCAGGACAGCAGG	chr17:g.41197747C>CCAGTGCCAGGACAGCAGG	BRCA1	LoF	p.C1847delinsSCCPGTG	insSCCPGTG/-	1847	-	ENST00000357654	1864.0	23
45	Very high	BRCA	c.6339_6356dupCGGCATGCAGCCCCAGCC	InFrameInsertion	2339	predicted	TIER 2	31	chr16:g.3778697_3778714dupGGGCTGCATGCCGGGCTG	chr16:g.3778691A>AGGCTGGGGCTGCATGCCG	CREBBP	LoF	p.M2115_G2120dupMQPQPG	-/MQPQPG	2115	-	ENST00000262367	2443.0	31
45	Very high	BRCA	c.12808C>T	Nonsense	4571	predicted	TIER 1	25	chr4:g.187517886G>A	chr4:g.187517886G>A	FAT1	LoF	p.R4270*	R/*	4270	-	ENST00000441802	4589.0	27
45	Very high	BRCA	c.3463C>T	Nonsense	544	predicted	TIER 1	27	chr2:g.212251596G>A	chr2:g.212251596G>A	ERBB4	LoF	p.R1155*	R/*	1155	-	ENST00000342788	1309.0	28
45	Very high	BRCA	c.11882_11884delATT	InFrameDeletion	2345	predicted	TIER 2	10	chr4:g.126384805_126384807delATT	chr4:g.126384799CTTA>C	FAT4	LoF	p.Y3961delY	Y/-	3961	+	ENST00000394329	4982.0	17
45	Very high	BRCA	c.11201delT	Frameshift	2149	predicted	TIER 1	9	chr4:g.126373372delT	chr4:g.126373366AT>A	FAT4	LoF	p.L3734Yfs*8	L/.	3734	+	ENST00000394329	4982.0	17
45	Very high	BRCA	c.9792C>G	Nonsense	1780	predicted	TIER 1	9	chr4:g.126371963C>G	chr4:g.126371963C>G	FAT4	LoF	p.Y3264*	Y/*	3264	+	ENST00000394329	4982.0	17
45	Very high	BRCA	c.7399C>T	Nonsense	1133	predicted	TIER 1	8	chr4:g.126367653C>T	chr4:g.126367653C>T	FAT4	LoF	p.Q2467*	Q/*	2467	+	ENST00000394329	4982.0	17
45	Very high	BRCA	c.7541C>A	Nonsense	3738	predicted	TIER 1	46	chr2:g.141294251G>T	chr2:g.141294251G>T	LRP1B	LoF	p.S2514*	S/*	2514	-	ENST00000389484	4600.0	91
45	Very high	BRCA	c.8859C>A	Nonsense	3001	predicted	TIER 1	56	chr2:g.141253309G>T	chr2:g.141253309G>T	LRP1B	LoF	p.C2953*	C/*	2953	-	ENST00000389484	4600.0	91
45	Very high	BRCA	c.13116_13119delTAAA	Frameshift	1102	predicted	TIER 1	85	chr2:g.141032021_141032024delTTAT	chr2:g.141032015CTTTA>C	LRP1B	LoF	p.N4372Kfs*82	N/.	4372	-	ENST00000389484	4600.0	91
45	Very high	BRCA	c.5398_5399insGCTCTCTGAGAAATGGAATCGTTGTTAAGCTTAAAAGGAACCTGAGGCTGTATCTGA	MultiAAMissense	2378	predicted	TIER 1	39	chr1:g.11190800_11190801insTCAGATACAGCCTCAGGTTCCTTTTAAGCTTAACAACGATTCCATTTCTCAGAGAGC	chr1:g.11190800G>GTCAGATACAGCCTCAGGTTCCTTTTAAGCTTAACAACGATTCCATTTCTCAGAGAGC	MTOR	Act	p.A1800delinsGSLRNGIVVKLKRNLRLYLT	insGSLRNGIVVKLKRNLRLYLT/-	1800	-	ENST00000361445	2550.0	58
45	Very high	BRCA	c.5791C>T	Nonsense	2959	predicted	TIER 2	35	chr4:g.87696690C>T	chr4:g.87696690C>T	PTPN13	ambiguous	p.Q1931*	Q/*	1931	+	ENST00000436978	2491.0	48
45	Very high	BRCA	c.5705delT	Frameshift	2931	predicted	TIER 2	35	chr4:g.87696604delT	chr4:g.87696602CT>C	PTPN13	ambiguous	p.L1902Yfs*32	L/.	1902	+	ENST00000436978	2491.0	48
45	Very high	BRCA	c.3031_3042delGATGCAGAATCT	InFrameDeletion	1855	predicted	TIER 2	18	chr4:g.87672003_87672014delGATGCAGAATCT	chr4:g.87671998GATCTGATGCAGA>G	PTPN13	ambiguous	p.D1011_S1014delDAES	DAES/-	1011	+	ENST00000436978	2491.0	48
45	Very high	BRCA	c.2865_2870dupGGAAAT	InFrameInsertion	1477	predicted	TIER 2	4	chr20:g.50401096_50401101dupATTTCC	chr20:g.50401095G>GATTTCC	SALL4	ambiguous	p.E956_I957insME	-/ME	956	-	ENST00000217086	1054.0	4
45	Very high	BRCA	c.8656_8657insGATCGACGATCGTCCGGCAGACGCGGGCTCAGGGGCGGGGC	Nonsense	3189	predicted	TIER 2	11	chr1:g.16261391_16261392insGATCGACGATCGTCCGGCAGACGCGGGCTCAGGGGCGGGGC	chr1:g.16261391T>TGATCGACGATCGTCCGGCAGACGCGGGCTCAGGGGCGGGGC	SPEN	ambiguous	p.L2886*fs*1	L/.	2886	+	ENST00000375759	3665.0	15
45	Very high	BRCA	c.4798_4803dupAAAGAC	InFrameInsertion	2094	predicted	TIER 2	11	chr1:g.16257533_16257538dupAAAGAC	chr1:g.16257532A>AAAAGAC	SPEN	ambiguous	p.K1600_D1601dupKD	-/KD	1600	+	ENST00000375759	3665.0	15
45	Very high	BRCA	c.4797_4802delAAAAGA	InFrameDeletion	2090	predicted	TIER 2	11	chr1:g.16257532_16257537delAAAAGA	chr1:g.16257520GAAAGAA>G	SPEN	ambiguous	p.E1599_K1600delEK	EK/-	1599	+	ENST00000375759	3665.0	15
45	Very high	BRCA	c.9726_9731delGAAGGA	InFrameDeletion	4557	predicted	TIER 2	10	chr16:g.72822449_72822454delCTCCTT	chr16:g.72822443TTCCTTC>T	ZFHX3	LoF	p.E3244_K3245delEK	EK/-	3244	-	ENST00000268489	3704.0	10
45	Very high	BRCA	c.10089_10097delGTACCAGCA	InFrameDeletion	4403	predicted	TIER 2	10	chr16:g.72822083_72822091delGTACTGCTG	chr16:g.72822077TTGCTGGTAC>T	ZFHX3	LoF	p.Y3367_Q3369delYQQ	YQQ/-	3367	-	ENST00000268489	3704.0	10
45	Very high	BRCA	c.10097_10098insGTACCAGC	Frameshift	4402	predicted	TIER 1	10	chr16:g.72822077_72822078insGCTGGTAC	chr16:g.72822077T>TGCTGGTAC	ZFHX3	LoF	p.Q3369Hfs*119	Q/.	3369	-	ENST00000268489	3704.0	10
45	Very high	BRCA	c.10098_10106delATACCAGCA	InFrameDeletion	4398	predicted	TIER 2	10	chr16:g.72822077_72822085delTTGCTGGTA	chr16:g.72822068CTGCTGGTAT>C	ZFHX3	LoF	p.Y3367_Q3369delYQQ	YQQ/-	3367	-	ENST00000268489	3704.0	10
45	Very high	BRCA	c.10908_10910delCTC	InFrameDeletion	3839	predicted	TIER 2	10	chr16:g.72821268_72821270delGAG	chr16:g.72821264TGAG>T	ZFHX3	LoF	p.S3639delS	S/-	3639	-	ENST00000268489	3704.0	10
45	Very high	BRCA	c.5330_5341delAAGAAGAGGAAG	InFrameDeletion	1159	predicted	TIER 2	20	chr1:g.27105719_27105730delAAGAAGAGGAAG	chr1:g.27105707TAGAAGAGGAAGA>T	ARID1A	LoF	p.E1777_E1780delEEEE	EEEE/-	1777	+	ENST00000324856	2286.0	20
45	Very high	BRCA	c.7666C>T	Nonsense	1543	predicted	TIER 1	10	chr4:g.187540074G>A	chr4:g.187540074G>A	FAT1	LoF	p.R2556*	R/*	2556	-	ENST00000441802	4589.0	27
45	Very high	BRCA	c.8287G>T	Nonsense	1367	predicted	TIER 1	10	chr4:g.187539453C>A	chr4:g.187539453C>A	FAT1	LoF	p.E2763*	E/*	2763	-	ENST00000441802	4589.0	27
45	Very high	BRCA	c.12682_12702dupCCGCAGGTCCCCGTGCGCCCC	InFrameInsertion	3385	predicted	TIER 2	23	chr11:g.92616304_92616324dupCCGCAGGTCCCCGTGCGCCCC	chr11:g.92616300G>GCCCCCGCAGGTCCCCGTGCGC	FAT3	ambiguous	p.P4228_P4234dupPQVPVRP	-/PQVPVRP	4228	+	ENST00000298047	4590.0	27
45	Very high	BRCA	c.10236C>G	Nonsense	2413	predicted	TIER 2	16	chr11:g.92570840C>G	chr11:g.92570840C>G	FAT3	ambiguous	p.Y3412*	Y/*	3412	+	ENST00000298047	4590.0	27
45	Very high	BRCA	c.7977G>A	Nonsense	1608	predicted	TIER 2	9	chr11:g.92534156G>A	chr11:g.92534156G>A	FAT3	ambiguous	p.W2659*	W/*	2659	+	ENST00000298047	4590.0	27
45	Very high	BRCA	c.5158_5163delCGGGAG	InFrameDeletion	1373	predicted	TIER 2	35	chr17:g.15967446_15967451delCTCCCG	chr17:g.15967439TCTCCCG>T	NCOR1	LoF	p.R1720_E1721delRE	RE/-	1720	-	ENST00000268712	2441.0	46
45	Very high	BRCA	c.5164_5175dupAAGGAGCGGGAG	InFrameInsertion	1368	predicted	TIER 2	35	chr17:g.15967438_15967449dupTTCTCCCGCTCC	chr17:g.15967427G>GCTCCCGCTCCTT	NCOR1	LoF	p.K1722_E1725dupKERE	-/KERE	1722	-	ENST00000268712	2441.0	46
45	Very high	BRCA	c.6925_6927delAGA	InFrameDeletion	682	predicted	TIER 2	44	chr17:g.15942777_15942779delTTC	chr17:g.15942774CTCT>C	NCOR1	LoF	p.R2309delR	R/-	2309	-	ENST00000268712	2441.0	46
45	Very high	BRCA	c.7107G>A	Nonsense	579	predicted	TIER 1	45	chr17:g.15938107C>T	chr17:g.15938107C>T	NCOR1	LoF	p.W2369*	W/*	2369	-	ENST00000268712	2441.0	46
45	Very high	BRCA	c.4053C>A	Nonsense	4693	predicted	TIER 2	33	chr8:g.69050718C>A	chr8:g.69050718C>A	PREX2	ambiguous	p.Y1351*	Y/*	1351	+	ENST00000288368	1607.0	40
45	Very high	BRCA	c.1710_1713delGGGA	Frameshift	3566	predicted	TIER 2	16	chr8:g.68992745_68992748delGGGA	chr8:g.68992741TGGAG>T	PREX2	ambiguous	p.E570Dfs*4	E/.	570	+	ENST00000288368	1607.0	40
45	Very high	BRCA	c.1570_1573delGGAG	SpliceAcceptorDeletion	3486	predicted	TIER 2	141515	chr8:g.68989632_68989635delGGAG	chr8:g.68989629CAGGG>C	PREX2	ambiguous	.	./.	.	+	ENST00000288368	1607.0	40
44	Very high	BRCA	c.7032G>A	Nonsense	4336	known	TIER 1	48	chr11:g.108198428G>A	chr11:g.108198428G>A	ATM	LoF	p.W2344*	W/*	2344	+	ENST00000278616	3057.0	63
44	Very high	BRCA	c.5692C>T	Nonsense	3694	predicted	TIER 1	38	chr11:g.108178641C>T	chr11:g.108178641C>T	ATM	LoF	p.R1898*	R/*	1898	+	ENST00000278616	3057.0	63
44	Very high	BRCA	c.3555_3558delAGAA	Frameshift	2776	predicted	TIER 1	24	chr11:g.108151874_108151877delAGAA	chr11:g.108151873TAGAA>T	ATM	LoF	p.L1185Ffs*5	L/.	1185	+	ENST00000278616	3057.0	63
44	Very high	BRCA	c.7757G>A	Nonsense	2516	known	TIER 1	16	chr13:g.32932018G>A	chr13:g.32932018G>A	BRCA2	LoF	p.W2586*	W/*	2586	+	ENST00000380152	3419.0	27
44	Very high	BRCA	c.7419_7420delTG	Frameshift	2361	predicted	TIER 1	14	chr13:g.32929409_32929410delTG	chr13:g.32929405AGT>A	BRCA2	LoF	p.C2473*fs*1	C/.	2473	+	ENST00000380152	3419.0	27
44	Very high	BRCA	c.6817_6819delAGA	InFrameDeletion	2100	predicted	TIER 2	11	chr13:g.32915309_32915311delAGA	chr13:g.32915304AAAG>A	BRCA2	LoF	p.R2273delR	R/-	2273	+	ENST00000380152	3419.0	27
44	Very high	BRCA	c.2291_2295+1delACCAGG	InFrameDeletion	4136	predicted	TIER 2	14	chr16:g.68862203_68862208delACCAGG	chr16:g.68862199GAGGACC>G	CDH1	LoF	p.Q765_D766delQD	QD/-	765	+	ENST00000261769	883.0	16
44	Very high	BRCA	c.6894_6905dupACAGCAGATGAA	InFrameInsertion	2100	predicted	TIER 2	31	chr16:g.3778144_3778155dupTCATCTGCTGTT	chr16:g.3778142C>CTTCATCTGCTGT	CREBBP	LoF	p.M2301_Q2304dupMKQQ	-/MKQQ	2301	-	ENST00000262367	2443.0	31
44	Very high	BRCA	c.3758_3759insAC	Frameshift	2693	predicted	TIER 2	23	chr7:g.101882702_101882703insAC	chr7:g.101882702A>AAC	CUX1	ambiguous	p.H1253Qfs*4	H/.	1253	+	ENST00000360264	1517.0	24
44	Very high	BRCA	c.1342C>T	Nonsense	556	predicted	TIER 1	7	chr16:g.67655479C>T	chr16:g.67655479C>T	CTCF	LoF	p.R448*	R/*	448	+	ENST00000264010	728.0	12
44	Very high	BRCA	c.1726_1727insAGGGTGAAGAGGGGATAAACATGGGGGAAGGCTGGTACATGATACAAGGTCGTGTACATGACACAGCCAAGT	MultiAAMissense	4570	predicted	TIER 1	12	chr2:g.46607537_46607538insAGGGTGAAGAGGGGATAAACATGGGGGAAGGCTGGTACATGATACAAGGTCGTGTACATGACACAGCCAAGT	chr2:g.46607537C>CAGGGTGAAGAGGGGATAAACATGGGGGAAGGCTGGTACATGATACAAGGTCGTGTACATGACACAGCCAAGT	EPAS1	ambiguous	p.P576delinsQGEEGINMGEGWYMIQGRVHDTAKS	insQGEEGINMGEGWYMIQGRVHDTAKS/-	576	+	ENST00000263734	871.0	16
44	Very high	BRCA	c.2771G>A	Nonsense	1374	predicted	TIER 2	16	chr3:g.89521694G>A	chr3:g.89521694G>A	EPHA3	ambiguous	p.W924*	W/*	924	+	ENST00000336596	984.0	17
44	Very high	BRCA	c.2233C>T	Nonsense	1150	predicted	TIER 2	13	chr3:g.89480396C>T	chr3:g.89480396C>T	EPHA3	ambiguous	p.R745*	R/*	745	+	ENST00000336596	984.0	17
44	Very high	BRCA	c.12525G>A	Nonsense	4648	predicted	TIER 1	25	chr4:g.187518169C>T	chr4:g.187518169C>T	FAT1	LoF	p.W4175*	W/*	4175	-	ENST00000441802	4589.0	27
44	Very high	BRCA	c.2512C>T	Nonsense	992	predicted	TIER 1	21	chr2:g.212295801G>A	chr2:g.212295801G>A	ERBB4	LoF	p.R838*	R/*	838	-	ENST00000342788	1309.0	28
44	Very high	BRCA	c.10436C>G	Nonsense	1951	predicted	TIER 1	9	chr4:g.126372607C>G	chr4:g.126372607C>G	FAT4	LoF	p.S3479*	S/*	3479	+	ENST00000394329	4982.0	17
44	Very high	BRCA	c.6347_6349delAAG	InFrameDeletion	739	predicted	TIER 2	5	chr4:g.126336465_126336467delAAG	chr4:g.126336459GAGA>G	FAT4	LoF	p.E2116delE	E/-	2116	+	ENST00000394329	4982.0	17
44	Very high	BRCA	c.12258T>A	Nonsense	1493	predicted	TIER 1	80	chr2:g.141083413A>T	chr2:g.141083413A>T	LRP1B	LoF	p.Y4086*	Y/*	4086	-	ENST00000389484	4600.0	91
44	Very high	BRCA	c.4159delG	Frameshift	4615	predicted	TIER 1	31	chr17:g.29580004delG	chr17:g.29580002AG>A	NF1	LoF	p.E1387Kfs*19	E/.	1387	+	ENST00000358273	2840.0	58
44	Very high	BRCA	c.7198C>T	Nonsense	4399	predicted	TIER 2	34	chr1:g.120458147G>A	chr1:g.120458147G>A	NOTCH2	ambiguous	p.R2400*	R/*	2400	-	ENST00000256646	2472.0	34
44	Very high	BRCA	c.4018G>T	Nonsense	2317	predicted	TIER 2	25	chr4:g.87685746G>T	chr4:g.87685746G>T	PTPN13	ambiguous	p.E1340*	E/*	1340	+	ENST00000436978	2491.0	48
44	Very high	BRCA	c.9778_9789dupGCTCCTGCCCCT	InFrameInsertion	3490	predicted	TIER 2	11	chr1:g.16262513_16262524dupGCTCCTGCCCCT	chr1:g.16262502T>TTCCTGCCCCTGC	SPEN	ambiguous	p.A3260_P3263dupAPAP	-/APAP	3260	+	ENST00000375759	3665.0	15
44	Very high	BRCA	c.9703_9726delAAGACACCAGATGCCAAAGCTGCC	InFrameDeletion	3466	predicted	TIER 2	11	chr1:g.16262438_16262461delAAGACACCAGATGCCAAAGCTGCC	chr1:g.16262429GAAGCTGCCAAGACACCAGATGCCA>G	SPEN	ambiguous	p.K3235_A3242delKTPDAKAA	KTPDAKAA/-	3235	+	ENST00000375759	3665.0	15
44	Very high	BRCA	c.9567_9572delGATGGG	InFrameDeletion	4651	predicted	TIER 2	10	chr16:g.72822603_72822608delCCCATC	chr16:g.72822602GCCCATC>G	ZFHX3	LoF	p.M3190_G3191delMG	MG/-	3190	-	ENST00000268489	3704.0	10
44	Very high	BRCA	c.9577C>T	Nonsense	4649	predicted	TIER 1	10	chr16:g.72822598G>A	chr16:g.72822598G>A	ZFHX3	LoF	p.Q3193*	Q/*	3193	-	ENST00000268489	3704.0	10
44	Very high	BRCA	c.9785_9787delGAG	InFrameDeletion	4536	predicted	TIER 2	10	chr16:g.72822390_72822392delCCT	chr16:g.72822387TCTC>T	ZFHX3	LoF	p.G3262delG	G/-	3262	-	ENST00000268489	3704.0	10
44	Very high	BRCA	c.9851_9867dupACCCTGCACAGCTGCAG	Frameshift	4494	predicted	TIER 1	10	chr16:g.72822310_72822326dupGCAGCTGTGCAGGGTCT	chr16:g.72822307C>CCTGCAGCTGTGCAGGGT	ZFHX3	LoF	p.A3290Tfs*12	A/.	3290	-	ENST00000268489	3704.0	10
44	Very high	BRCA	c.9871_9879delCTGCAGGCC	InFrameDeletion	4489	predicted	TIER 2	10	chr16:g.72822305_72822313delGGCCTGCAG	chr16:g.72822295CGGCCTGCAG>C	ZFHX3	LoF	p.L3291_A3293delLQA	LQA/-	3291	-	ENST00000268489	3704.0	10
44	Very high	BRCA	c.9871_9879dupCTGCAGGCC	InFrameInsertion	4487	predicted	TIER 2	10	chr16:g.72822305_72822313dupGGCCTGCAG	chr16:g.72822295C>CGGCCTGCAG	ZFHX3	LoF	p.L3291_A3293dupLQA	-/LQA	3291	-	ENST00000268489	3704.0	10
44	Very high	BRCA	c.9910_9953dupACAAGCCAGTTCCTTCCTTACTTTGTACCAGGCTTTTCTCCTTA	Nonsense	4462	predicted	TIER 1	10	chr16:g.72822222_72822265dupTAAGGAGAAAAGCCTGGTACAAAGTAAGGAAGGAACTGGCTTGT	chr16:g.72822221A>ATAAGGAGAAAAGCCTGGTACAAAGTAAGGAAGGAACTGGCTTGT	ZFHX3	LoF	p.Y3318*fs*1	Y/.	3318	-	ENST00000268489	3704.0	10
44	Very high	BRCA	c.10533_10562delTGGCAGTGGCGGCGGCGGCGGCGGTGGCGG	InFrameDeletion	4073	predicted	TIER 2	10	chr16:g.72821618_72821647delACCGCCGCCGCCGCCGCCACTGCCACCGCC	chr16:g.72821612GCCGCCACCGCCGCCGCCGCCGCCACTGCCA>G	ZFHX3	LoF	p.S3513_G3522delSGGGGGGGGG	SGGGGGGGGG/-	3513	-	ENST00000268489	3704.0	10
44	Very high	BRCA	c.10533_10565delTGGCAGTGGCGGCGGCGGCGGCGGTGGCGGCGG	InFrameDeletion	4066	predicted	TIER 2	10	chr16:g.72821618_72821650delACCGCCGCCGCCGCCGCCACTGCCACCGCCGCC	chr16:g.72821609GCCGCCGCCACCGCCGCCGCCGCCGCCACTGCCA>G	ZFHX3	LoF	p.S3513_G3523delSGGGGGGGGGG	SGGGGGGGGGG/-	3513	-	ENST00000268489	3704.0	10
44	Very high	BRCA	c.10533_10568delTGGCAGTGGCGGCGGCGGCGGCGGTGGCGGCGGCGG	InFrameDeletion	4060	predicted	TIER 2	10	chr16:g.72821618_72821653delACCGCCGCCGCCGCCGCCACTGCCACCGCCGCCGCC	chr16:g.72821606GCCGCCGCCGCCACCGCCGCCGCCGCCGCCACTGCCA>G	ZFHX3	LoF	p.S3513_G3524delSGGGGGGGGGGG	SGGGGGGGGGGG/-	3513	-	ENST00000268489	3704.0	10
44	Very high	BRCA	c.10537_10569delAGTGGCGGCGGCGGCGGCGGTGGCGGCGGCGGC	InFrameDeletion	4057	predicted	TIER 2	10	chr16:g.72821609_72821641delGCCGCCGCCACCGCCGCCGCCGCCGCCACTGCC	chr16:g.72821605CGCCGCCGCCGCCACCGCCGCCGCCGCCGCCACT>C	ZFHX3	LoF	p.S3513_G3523delSGGGGGGGGGG	SGGGGGGGGGG/-	3513	-	ENST00000268489	3704.0	10
44	Very high	BRCA	c.10533_10571delTGGCAGTGGCGGCGGCGGCGGCGGTGGCGGCGGCGGCGG	InFrameDeletion	4054	predicted	TIER 2	10	chr16:g.72821618_72821656delACCGCCGCCGCCGCCGCCACTGCCACCGCCGCCGCCGCC	chr16:g.72821603GCCGCCGCCGCCGCCACCGCCGCCGCCGCCGCCACTGCCA>G	ZFHX3	LoF	p.S3513_G3525delSGGGGGGGGGGGG	SGGGGGGGGGGGG/-	3513	-	ENST00000268489	3704.0	10
44	Very high	BRCA	c.10533_10574delTGGCAGTGGCGGCGGCGGCGGCGGTGGCGGCGGCGGCGGCGG	InFrameDeletion	4047	predicted	TIER 2	10	chr16:g.72821616_72821657delCCACCGCCGCCGCCGCCGCCACTGCCACCGCCGCCGCCGCCG	chr16:g.72821600GCCGCCGCCGCCGCCGCCACCGCCGCCGCCGCCGCCACTGCCA>G	ZFHX3	LoF	p.S3513_G3526delSGGGGGGGGGGGGG	SGGGGGGGGGGGGG/-	3513	-	ENST00000268489	3704.0	10
44	Very high	BRCA	c.10557_10580delTGGCGGCGGCGGCGGCGGCGGCGG	InFrameDeletion	4030	predicted	TIER 2	10	chr16:g.72821612_72821635delGCCGCCACCGCCGCCGCCGCCGCC	chr16:g.72821594GCCGCCGCCGCCGCCGCCGCCGCCA>G	ZFHX3	LoF	p.G3520_G3527delGGGGGGGG	GGGGGGGG/-	3520	-	ENST00000268489	3704.0	10
44	Very high	BRCA	c.10855_10875dupCAAGTGGTCTCCCGGGCTTCG	InFrameInsertion	3853	predicted	TIER 2	10	chr16:g.72821302_72821322dupAAGCCCGGGAGACCACTTGCG	chr16:g.72821299C>CCGAAGCCCGGGAGACCACTTG	ZFHX3	LoF	p.Q3619_S3625dupQVVSRAS	-/QVVSRAS	3619	-	ENST00000268489	3704.0	10
44	Very high	BRCA	c.5223_5225delCGA	InFrameDeletion	3775	predicted	TIER 2	20	chr6:g.157527498_157527500delCGA	chr6:g.157527492TGAC>T	ARID1B	LoF	p.D1741delD	D/-	1741	+	ENST00000346085	2250.0	20
44	Very high	BRCA	c.3317G>A	Nonsense	3097	predicted	TIER 1	3	chr4:g.187584716C>T	chr4:g.187584716C>T	FAT1	LoF	p.W1106*	W/*	1106	-	ENST00000441802	4589.0	27
44	Very high	BRCA	c.12886_12897delCGCTCCGACTGC	InFrameDeletion	3448	predicted	TIER 2	23	chr11:g.92616508_92616519delCGCTCCGACTGC	chr11:g.92616503CCTGCCGCTCCGA>C	FAT3	ambiguous	p.R4296_C4299delRSDC	RSDC/-	4296	+	ENST00000298047	4590.0	27
44	Very high	BRCA	c.6688C>T	Nonsense	1273	predicted	TIER 2	9	chr11:g.92532867C>T	chr11:g.92532867C>T	FAT3	ambiguous	p.Q2230*	Q/*	2230	+	ENST00000298047	4590.0	27
44	Very high	BRCA	c.7207C>T	Nonsense	1593	predicted	TIER 1	37	chr7:g.151877154G>A	chr7:g.151877154G>A	MLL3	LoF	p.R2403*	R/*	2403	-	ENST00000262189	4912.0	59
44	Very high	BRCA	c.7349_7351delCTT	InFrameDeletion	1554	predicted	TIER 2	37	chr7:g.151877010_151877012delAAG	chr7:g.151877009AAAG>A	MLL3	LoF	p.P2450delP	P/-	2450	-	ENST00000262189	4912.0	59
44	Very high	BRCA	c.8161_8166delAATTTA	InFrameDeletion	1282	predicted	TIER 2	38	chr7:g.151874375_151874380delATTTAA	chr7:g.151874371CTAAATT>C	MLL3	LoF	p.N2721_L2722delNL	NL/-	2721	-	ENST00000262189	4912.0	59
44	Very high	BRCA	c.10913C>G	Nonsense	444	predicted	TIER 1	43	chr7:g.151859749G>C	chr7:g.151859749G>C	MLL3	LoF	p.S3638*	S/*	3638	-	ENST00000262189	4912.0	59
44	Very high	BRCA	c.11424_11426delTAA	InFrameDeletion	288	predicted	TIER 2	43	chr7:g.151859240_151859242delTAT	chr7:g.151859235TTTA>T	MLL3	LoF	p.N3808delN	N/-	3808	-	ENST00000262189	4912.0	59
44	Very high	BRCA	c.11577_11582delGCAGCA	InFrameDeletion	1088	predicted	TIER 2	39	chr12:g.49426917_49426922delCTGCTG	chr12:g.49426905TTGCTGC>T	MLL2	LoF	p.Q3862_Q3863delQQ	QQ/-	3862	-	ENST00000301067	5538.0	54
44	Very high	BRCA	c.11580_11582delGCA	InFrameDeletion	1087	predicted	TIER 2	39	chr12:g.49426920_49426922delCTG	chr12:g.49426905TTGC>T	MLL2	LoF	p.Q3863delQ	Q/-	3863	-	ENST00000301067	5538.0	54
44	Very high	BRCA	c.11577_11582dupGCAGCA	InFrameInsertion	1086	predicted	TIER 2	39	chr12:g.49426917_49426922dupCTGCTG	chr12:g.49426905T>TTGCTGC	MLL2	LoF	p.Q3862_Q3863dupQQ	-/QQ	3862	-	ENST00000301067	5538.0	54
44	Very high	BRCA	c.12692_12697dupTGCAGC	InFrameInsertion	748	predicted	TIER 2	39	chr12:g.49425796_49425801dupAGCTGC	chr12:g.49425790T>TGCTGCA	MLL2	LoF	p.L4231_Q4232dupLQ	-/LQ	4231	-	ENST00000301067	5538.0	54
44	Very high	BRCA	c.5153_5164delGGGAGCGGGAGA	MultiAAMissense	1372	predicted	TIER 1	35	chr17:g.15967439_15967450delTCTCCCGCTCCC	chr17:g.15967438TTCTCCCGCTCCC>T	NCOR1	LoF	p.R1718_K1722delinsQ	insQ/-	1718	-	ENST00000268712	2441.0	46
44	Very high	BRCA	c.5164_5166delAAG	InFrameDeletion	1371	predicted	TIER 2	35	chr17:g.15967439_15967441delTCT	chr17:g.15967436CCTT>C	NCOR1	LoF	p.K1722delK	K/-	1722	-	ENST00000268712	2441.0	46
44	Very high	BRCA	c.5175_5180dupGCGGGA	InFrameInsertion	1365	predicted	TIER 2	35	chr17:g.15967432_15967437dupCGCTCC	chr17:g.15967422T>TTCCCGC	NCOR1	LoF	p.E1727_R1728dupER	-/ER	1727	-	ENST00000268712	2441.0	46
44	Very high	BRCA	c.2745G>A	Nonsense	4072	predicted	TIER 2	24	chr8:g.69020373G>A	chr8:g.69020373G>A	PREX2	ambiguous	p.W915*	W/*	915	+	ENST00000288368	1607.0	40
44	Very high	BRCA	c.1557G>A	Nonsense	3459	predicted	TIER 2	14	chr8:g.68984793G>A	chr8:g.68984793G>A	PREX2	ambiguous	p.W519*	W/*	519	+	ENST00000288368	1607.0	40
44	Very high	BRCA	c.1253G>A	Nonsense	3297	predicted	TIER 2	11	chr8:g.68972928G>A	chr8:g.68972928G>A	PREX2	ambiguous	p.W418*	W/*	418	+	ENST00000288368	1607.0	40
44	Very high	BRCA	c.383delA	Frameshift	2852	predicted	TIER 2	4	chr8:g.68934317delA	chr8:g.68934315GA>G	PREX2	ambiguous	p.K128Rfs*12	K/.	128	+	ENST00000288368	1607.0	40
44	Very high	BRCA	c.2039_2047delGCTTTGCCG	InFrameDeletion	192	predicted	TIER 2	16	chr5:g.67593293_67593301delGCTTTGCCG	chr5:g.67593291TGGCTTTGCC>T	PIK3R1	LoF	p.G680_A682delGFA	GFA/-	680	+	ENST00000521381	725.0	16
44	Very high	BRCA	c.1924C>T	Nonsense	136	predicted	TIER 1	15	chr5:g.67592108C>T	chr5:g.67592108C>T	PIK3R1	LoF	p.R642*	R/*	642	+	ENST00000521381	725.0	16
44	Very high	BRCA	c.7056_7061delCAAGGA	InFrameDeletion	414	predicted	TIER 2	9	chr16:g.72829521_72829526delCCTTGT	chr16:g.72829519ATCCTTG>A	ZFHX3	LoF	p.K2353_D2354delKD	KD/-	2353	-	ENST00000268489	3704.0	10
44	Very high	BRCA	c.7057_7062delAAGGAT	InFrameDeletion	413	predicted	TIER 2	9	chr16:g.72829519_72829524delATCCTT	chr16:g.72829518CATCCTT>C	ZFHX3	LoF	p.K2353_D2354delKD	KD/-	2353	-	ENST00000268489	3704.0	10
44	Very high	BRCA	c.7068_7073delTGAGGA	InFrameDeletion	408	predicted	TIER 2	9	chr16:g.72829518_72829523delCATCCT	chr16:g.72829507CTCCTCA>C	ZFHX3	LoF	p.D2356_E2357delDE	DE/-	2356	-	ENST00000268489	3704.0	10
44	Very high	BRCA	c.7068_7073dupTGAGGA	InFrameInsertion	407	predicted	TIER 2	9	chr16:g.72829518_72829523dupCATCCT	chr16:g.72829507C>CTCCTCA	ZFHX3	LoF	p.D2356_E2357dupDE	-/DE	2356	-	ENST00000268489	3704.0	10
44	Very high	BRCA	c.7110_7118delTGCCATGGA	InFrameDeletion	394	predicted	TIER 2	9	chr16:g.72829470_72829478delCATCCATGG	chr16:g.72829462TTCCATGGCA>T	ZFHX3	LoF	p.D2370_M2372delDAM	DAM/-	2370	-	ENST00000268489	3704.0	10
43	Very high	BRCA	c.7327C>T	Nonsense	4458	known	TIER 1	50	chr11:g.108200960C>T	chr11:g.108200960C>T	ATM	LoF	p.R2443*	R/*	2443	+	ENST00000278616	3057.0	63
43	Very high	BRCA	c.6082C>T	Nonsense	3863	known	TIER 1	41	chr11:g.108186625C>T	chr11:g.108186625C>T	ATM	LoF	p.Q2028*	Q/*	2028	+	ENST00000278616	3057.0	63
43	Very high	BRCA	c.7388dupT	Frameshift	4478	predicted	TIER 1	50	chr11:g.108201021dupT	chr11:g.108201019C>CT	ATM	LoF	p.L2463Ffs*3	L/.	2463	+	ENST00000278616	3057.0	63
43	Very high	BRCA	c.6289_6291delGAA	InFrameDeletion	3992	predicted	TIER 2	43	chr11:g.108188190_108188192delGAA	chr11:g.108188185TAGA>T	ATM	LoF	p.E2097delE	E/-	2097	+	ENST00000278616	3057.0	63
43	Very high	BRCA	c.4046_4064delTGACGTTACATGAGCCAGC	Frameshift	2961	predicted	TIER 1	27	chr11:g.108158379_108158397delTGACGTTACATGAGCCAGC	chr11:g.108158378ATGACGTTACATGAGCCAGC>A	ATM	LoF	p.M1349Kfs*31	M/.	1349	+	ENST00000278616	3057.0	63
43	Very high	BRCA	c.1564_1565delGA	Frameshift	1713	predicted	TIER 1	10	chr11:g.108121756_108121757delGA	chr11:g.108121752CAG>C	ATM	LoF	p.E522Ifs*43	E/.	522	+	ENST00000278616	3057.0	63
43	Very high	BRCA	c.5251C>T	Nonsense	2819	known	TIER 1	19	chr17:g.41209095G>A	chr17:g.41209095G>A	BRCA1	LoF	p.R1751*	R/*	1751	-	ENST00000357654	1864.0	23
43	Very high	BRCA	c.5102_5103delTG	Frameshift	2899	predicted	TIER 1	17	chr17:g.41215940_41215941delCA	chr17:g.41215939TCA>T	BRCA1	LoF	p.L1701Qfs*14	L/.	1701	-	ENST00000357654	1864.0	23
43	Very high	BRCA	c.7558C>T	Nonsense	2436	known	TIER 1	15	chr13:g.32930687C>T	chr13:g.32930687C>T	BRCA2	LoF	p.R2520*	R/*	2520	+	ENST00000380152	3419.0	27
43	Very high	BRCA	c.7063G>T	Nonsense	2269	predicted	TIER 1	14	chr13:g.32929053G>T	chr13:g.32929053G>T	BRCA2	LoF	p.E2355*	E/*	2355	+	ENST00000380152	3419.0	27
43	Very high	BRCA	c.4680_4682delAGA	InFrameDeletion	2899	predicted	TIER 2	28	chr16:g.3786090_3786092delCTT	chr16:g.3786082CTCT>C	CREBBP	LoF	p.E1562delE	E/-	1562	-	ENST00000262367	2443.0	31
43	Very high	BRCA	c.6621_6644delACAACAGCAGCAACAGCAGCAGCA	InFrameDeletion	2199	predicted	TIER 2	31	chr16:g.3778424_3778447delTTGTTGCTGCTGCTGTTGCTGCTG	chr16:g.3778403CTGCTGCTGCTGTTGCTGCTGTTGT>C	CREBBP	LoF	p.Q2209_Q2216delQQQQQQQQ	QQQQQQQQ/-	2209	-	ENST00000262367	2443.0	31
43	Very high	BRCA	c.6633_6644delACAGCAGCAGCA	InFrameDeletion	2198	predicted	TIER 2	31	chr16:g.3778412_3778423delCTGTTGCTGCTG	chr16:g.3778403CTGCTGCTGCTGT>C	CREBBP	LoF	p.Q2213_Q2216delQQQQ	QQQQ/-	2213	-	ENST00000262367	2443.0	31
43	Very high	BRCA	c.6807_6824delACAGCTTGGCCAGATGGG	InFrameDeletion	2117	predicted	TIER 2	31	chr16:g.3778232_3778249delGCCAAGCTGTCCCATCTG	chr16:g.3778223CCCCATCTGGCCAAGCTGT>C	CREBBP	LoF	p.L2271_Q2276delLGQMGQ	LGQMGQ/-	2271	-	ENST00000262367	2443.0	31
43	Very high	BRCA	c.4109_4114delGAGAGG	InFrameDeletion	2801	predicted	TIER 2	24	chr7:g.101891880_101891885delGAGAGG	chr7:g.101891876CAGGGAG>C	CUX1	ambiguous	p.G1370_E1371delGE	GE/-	1370	+	ENST00000360264	1517.0	24
43	Very high	BRCA	c.3748delC	Frameshift	2686	predicted	TIER 2	23	chr7:g.101882692delC	chr7:g.101882687GC>G	CUX1	ambiguous	p.Q1250Sfs*6	Q/.	1250	+	ENST00000360264	1517.0	24
43	Very high	BRCA	c.411_413delCAA	InFrameDeletion	1185	predicted	TIER 2	5	chr7:g.101740753_101740755delCAA	chr7:g.101740748TACA>T	CUX1	ambiguous	p.N137delN	N/-	137	+	ENST00000360264	1517.0	24
43	Very high	BRCA	c.12292delT	Frameshift	4758	predicted	TIER 1	24	chr4:g.187518912delA	chr4:g.187518911CA>C	FAT1	LoF	p.C4098Vfs*108	C/.	4098	-	ENST00000441802	4589.0	27
43	Very high	BRCA	c.10408C>T	Nonsense	1943	predicted	TIER 1	9	chr4:g.126372579C>T	chr4:g.126372579C>T	FAT4	LoF	p.R3470*	R/*	3470	+	ENST00000394329	4982.0	17
43	Very high	BRCA	c.3826C>T	Nonsense	4447	known	TIER 1	28	chr17:g.29562746C>T	chr17:g.29562746C>T	NF1	LoF	p.R1276*	R/*	1276	+	ENST00000358273	2840.0	58
43	Very high	BRCA	c.2266delC	Frameshift	3913	predicted	TIER 1	19	chr17:g.29554250delC	chr17:g.29554249TC>T	NF1	LoF	p.Q756Rfs*4	Q/.	756	+	ENST00000358273	2840.0	58
43	Very high	BRCA	c.5546_5551delAAGATG	InFrameDeletion	4913	predicted	TIER 2	31	chr1:g.120462175_120462180delTTCATC	chr1:g.120462164GCATCTT>G	NOTCH2	ambiguous	p.E1849_D1850delED	ED/-	1849	-	ENST00000256646	2472.0	34
43	Very high	BRCA	c.3262G>T	Nonsense	2000	predicted	TIER 2	21	chr4:g.87679451G>T	chr4:g.87679451G>T	PTPN13	ambiguous	p.E1088*	E/*	1088	+	ENST00000436978	2491.0	48
43	Very high	BRCA	c.1596_1597delAA	Frameshift	1293	predicted	TIER 2	10	chr4:g.87643575_87643576delAA	chr4:g.87643573CAA>C	PTPN13	ambiguous	p.R533Kfs*9	R/.	533	+	ENST00000436978	2491.0	48
43	Very high	BRCA	c.1144C>T	Nonsense	3764	predicted	TIER 2	15	chr1:g.240969565G>A	chr1:g.240969565G>A	RGS7	ambiguous	p.Q382*	Q/*	382	-	ENST00000366565	488.0	18
43	Very high	BRCA	c.1112_1123dupTGGGCTCGGCCA	InFrameInsertion	685	predicted	TIER 2	9	chr21:g.36164759_36164770dupGCCCATGGCCGA	chr21:g.36164751G>GTGGCCGAGCCCA	RUNX1	ambiguous	p.M371_A374dupMGSA	-/MGSA	371	-	ENST00000437180	481.0	9
43	Very high	BRCA	c.7532_7552dupAGTCTACTCCATCTCCAGCTC	InFrameInsertion	2878	predicted	TIER 2	11	chr1:g.16260267_16260287dupAGTCTACTCCATCTCCAGCTC	chr1:g.16260262G>GGCTCAGTCTACTCCATCTCCA	SPEN	ambiguous	p.Q2511_A2517dupQSTPSPA	-/QSTPSPA	2511	+	ENST00000375759	3665.0	15
43	Very high	BRCA	c.6959_6961delAAG	InFrameDeletion	2712	predicted	TIER 2	11	chr1:g.16259694_16259696delAAG	chr1:g.16259690AAAG>A	SPEN	ambiguous	p.E2320delE	E/-	2320	+	ENST00000375759	3665.0	15
43	Very high	BRCA	c.4494_4496delGAA	InFrameDeletion	2034	predicted	TIER 2	11	chr1:g.16257229_16257231delGAA	chr1:g.16257223AAAG>A	SPEN	ambiguous	p.K1499delK	K/-	1499	+	ENST00000375759	3665.0	15
43	Very high	BRCA	c.796G>T	Nonsense	173	predicted	TIER 1	8	chr17:g.7577142C>A	chr17:g.7577142C>A	TP53	LoF	p.G266*	G/*	266	-	ENST00000269305	394.0	11
43	Very high	BRCA	c.8823_8824insTCTGCAGGCAAATCTGGTGACAGCGGG	InFrameInsertion	4891	predicted	TIER 2	9	chr16:g.72827757_72827758insCCCGCTGTCACCAGATTTGCCTGCAGA	chr16:g.72827757C>CCCCGCTGTCACCAGATTTGCCTGCAGA	ZFHX3	LoF	p.S2933_G2941dupSAGKSGDSG	-/SAGKSGDSG	2933	-	ENST00000268489	3704.0	10
43	Very high	BRCA	c.9007_9009delAAG	InFrameDeletion	4863	predicted	TIER 2	9	chr16:g.72827575_72827577delCTT	chr16:g.72827571ACTT>A	ZFHX3	LoF	p.K3003delK	K/-	3003	-	ENST00000268489	3704.0	10
43	Very high	BRCA	c.9724_9726delGAG	InFrameDeletion	4561	predicted	TIER 2	10	chr16:g.72822451_72822453delCCT	chr16:g.72822448TCTC>T	ZFHX3	LoF	p.E3242delE	E/-	3242	-	ENST00000268489	3704.0	10
43	Very high	BRCA	c.10578_10583dupCGGCTC	InFrameInsertion	4017	predicted	TIER 2	10	chr16:g.72821592_72821597dupGAGCCG	chr16:g.72821591C>CGAGCCG	ZFHX3	LoF	p.G3527_S3528dupGS	-/GS	3527	-	ENST00000268489	3704.0	10
43	Very high	BRCA	c.5975_5976insTTG	InFrameInsertion	3988	predicted	TIER 2	20	chr6:g.157528250_157528251insTTG	chr6:g.157528250C>CTTG	ARID1B	LoF	p.P1992_Q1993insW	-/W	1992	+	ENST00000346085	2250.0	20
43	Very high	BRCA	c.5407_5409delGAG	InFrameDeletion	1182	predicted	TIER 2	20	chr1:g.27105796_27105798delGAG	chr1:g.27105792TGAG>T	ARID1A	LoF	p.E1803delE	E/-	1803	+	ENST00000324856	2286.0	20
43	Very high	BRCA	c.5296_5301delGAAGAA	InFrameDeletion	1142	predicted	TIER 2	20	chr1:g.27105685_27105690delGAAGAA	chr1:g.27105675GGAAGAA>G	ARID1A	LoF	p.E1766_E1767delEE	EE/-	1766	+	ENST00000324856	2286.0	20
43	Very high	BRCA	c.5299_5301delGAA	InFrameDeletion	1141	predicted	TIER 2	20	chr1:g.27105688_27105690delGAA	chr1:g.27105675GGAA>G	ARID1A	LoF	p.E1767delE	E/-	1767	+	ENST00000324856	2286.0	20
43	Very high	BRCA	c.4683G>A	Nonsense	2471	predicted	TIER 1	9	chr4:g.187549435C>T	chr4:g.187549435C>T	FAT1	LoF	p.W1561*	W/*	1561	-	ENST00000441802	4589.0	27
43	Very high	BRCA	c.8266_8269delCAGA	Frameshift	1374	predicted	TIER 1	10	chr4:g.187539477_187539480delTGTC	chr4:g.187539470CTCTG>C	FAT1	LoF	p.Q2756Afs*4	Q/.	2756	-	ENST00000441802	4589.0	27
43	Very high	BRCA	c.11614C>T	Nonsense	50	predicted	TIER 1	21	chr4:g.187522449G>A	chr4:g.187522449G>A	FAT1	LoF	p.R3872*	R/*	3872	-	ENST00000441802	4589.0	27
43	Very high	BRCA	c.12310C>T	Nonsense	3248	predicted	TIER 2	23	chr11:g.92615932C>T	chr11:g.92615932C>T	FAT3	ambiguous	p.R4104*	R/*	4104	+	ENST00000298047	4590.0	27
43	Very high	BRCA	c.4996delG	Frameshift	2339	predicted	TIER 1	33	chr7:g.151884360delC	chr7:g.151884358TC>T	MLL3	LoF	p.E1666Kfs*10	E/.	1666	-	ENST00000262189	4912.0	59
43	Very high	BRCA	c.9813_9815dupGCA	InFrameInsertion	756	predicted	TIER 2	43	chr7:g.151860855_151860857dupCTG	chr7:g.151860846T>TTGC	MLL3	LoF	p.Q3272dupQ	-/Q	3272	-	ENST00000262189	4912.0	59
43	Very high	BRCA	c.10800_10802dupGCA	InFrameInsertion	1297	predicted	TIER 2	39	chr12:g.49427693_49427695dupGCT	chr12:g.49427685T>TTGC	MLL2	LoF	p.Q3612dupQ	-/Q	3612	-	ENST00000301067	5538.0	54
43	Very high	BRCA	c.10803_10820dupACAACAGCAGCAGCAGCA	InFrameInsertion	1290	predicted	TIER 2	39	chr12:g.49427678_49427695dupGCTGTTGTTGCTGCTGCT	chr12:g.49427667C>CTGCTGCTGCTGCTGTTGT	MLL2	LoF	p.Q3607_Q3612dupQQQQQQ	-/QQQQQQ	3607	-	ENST00000301067	5538.0	54
43	Very high	BRCA	c.10812_10832dupGCAGCAGCAGCAACAACAGCA	InFrameInsertion	1283	predicted	TIER 2	39	chr12:g.49427675_49427695dupGCTGCTGTTGTTGCTGCTGCT	chr12:g.49427655T>TTGCTGTTGTTGCTGCTGCTGC	MLL2	LoF	p.Q3606_Q3612dupQQQQQQQ	-/QQQQQQQ	3606	-	ENST00000301067	5538.0	54
43	Very high	BRCA	c.11580_11582dupGCA	InFrameInsertion	1085	predicted	TIER 2	39	chr12:g.49426920_49426922dupCTG	chr12:g.49426905T>TTGC	MLL2	LoF	p.Q3863dupQ	-/Q	3863	-	ENST00000301067	5538.0	54
43	Very high	BRCA	c.12662_12664dupAGC	InFrameInsertion	765	predicted	TIER 2	39	chr12:g.49425837_49425839dupCTG	chr12:g.49425823A>AGCT	MLL2	LoF	p.Q4221dupQ	-/Q	4221	-	ENST00000301067	5538.0	54
43	Very high	BRCA	c.3333C>A	Nonsense	4313	predicted	TIER 2	27	chr8:g.69030791C>A	chr8:g.69030791C>A	PREX2	ambiguous	p.C1111*	C/*	1111	+	ENST00000288368	1607.0	40
43	Very high	BRCA	c.553_565delAAGCGGACTCCAC	Frameshift	2976	predicted	TIER 2	6	chr8:g.68942741_68942753delAAGCGGACTCCAC	chr8:g.68942740GAAGCGGACTCCAC>G	PREX2	ambiguous	p.K185Gfs*9	K/.	185	+	ENST00000288368	1607.0	40
43	Very high	BRCA	c.524_527delAGTA	Frameshift	2932	predicted	TIER 2	5	chr8:g.68939539_68939542delAGTA	chr8:g.68939537CAAGT>C	PREX2	ambiguous	p.K175Tfs*5	K/.	175	+	ENST00000288368	1607.0	40
43	Very high	BRCA	c.6911_6912delAG	Frameshift	452	predicted	TIER 1	9	chr16:g.72829669_72829670delCT	chr16:g.72829668CCT>C	ZFHX3	LoF	p.Q2304Rfs*10	Q/.	2304	-	ENST00000268489	3704.0	10
43	Very high	BRCA	c.7378_7386delCCCGAGCAG	InFrameDeletion	315	predicted	TIER 2	9	chr16:g.72829201_72829209delGGGCTGCTC	chr16:g.72829194TCTGCTCGGG>T	ZFHX3	LoF	p.P2460_Q2462delPEQ	PEQ/-	2460	-	ENST00000268489	3704.0	10
43	Very high	BRCA	c.7871_7894delCAAGCCCTGGCGAAAACGACAGTG	InFrameDeletion	152	predicted	TIER 2	9	chr16:g.72828692_72828715delTCGTTTTCGCCAGGGCTTGCACTG	chr16:g.72828686CCACTGTCGTTTTCGCCAGGGCTTG>C	ZFHX3	LoF	p.A2624_S2631delASPGENDS	ASPGENDS/-	2624	-	ENST00000268489	3704.0	10
43	Very high	BRCA	c.7908_7910delAGA	InFrameDeletion	147	predicted	TIER 2	9	chr16:g.72828674_72828676delTCT	chr16:g.72828670CTCT>C	ZFHX3	LoF	p.E2637delE	E/-	2637	-	ENST00000268489	3704.0	10
42	Very high	BRCA	c.1954_1955insAGGTCATGG	InFrameInsertion	4861	predicted	TIER 2	5	chr1:g.27087380_27087381insAGGTCATGG	chr1:g.27087375C>CCATGGAGGT	ARID1A	LoF	p.M651_G652insEVM	-/EVM	651	+	ENST00000324856	2286.0	20
42	Very high	BRCA	c.7096G>T	Nonsense	4376	known	TIER 1	49	chr11:g.108199754G>T	chr11:g.108199754G>T	ATM	LoF	p.E2366*	E/*	2366	+	ENST00000278616	3057.0	63
42	Very high	BRCA	c.7629_7629+4delTGTAA	SpliceDonorDeletion	4565	predicted	TIER 1	515152	chr11:g.108202284_108202288delTGTAA	chr11:g.108202280ATAATG>A	ATM	LoF	.	./.	.	+	ENST00000278616	3057.0	63
42	Very high	BRCA	c.5554C>T	Nonsense	3640	predicted	TIER 1	37	chr11:g.108175459C>T	chr11:g.108175459C>T	ATM	LoF	p.Q1852*	Q/*	1852	+	ENST00000278616	3057.0	63
42	Very high	BRCA	c.4088C>G	Nonsense	3417	known	TIER 1	10	chr17:g.41243460G>C	chr17:g.41243460G>C	BRCA1	LoF	p.S1363*	S/*	1363	-	ENST00000357654	1864.0	23
42	Very high	BRCA	c.4183C>T	Nonsense	3365	known	TIER 1	11	chr17:g.41242963G>A	chr17:g.41242963G>A	BRCA1	LoF	p.Q1395*	Q/*	1395	-	ENST00000357654	1864.0	23
42	Very high	BRCA	c.5503C>T	Nonsense	2618	known	passenger	23	chr17:g.41197784G>A	chr17:g.41197784G>A	BRCA1	LoF	p.R1835*	R/*	1835	-	ENST00000357654	1864.0	23
42	Very high	BRCA	c.4182_4183dupTC	Frameshift	3364	predicted	TIER 1	11	chr17:g.41242964_41242965dupAG	chr17:g.41242962T>TGA	BRCA1	LoF	p.Q1395Lfs*11	Q/.	1395	-	ENST00000357654	1864.0	23
42	Very high	BRCA	c.3103G>T	Nonsense	980	known	TIER 1	11	chr13:g.32911595G>T	chr13:g.32911595G>T	BRCA2	LoF	p.E1035*	E/*	1035	+	ENST00000380152	3419.0	27
42	Very high	BRCA	c.3077_3079dupAGA	InFrameInsertion	966	predicted	TIER 2	11	chr13:g.32911569_32911571dupAGA	chr13:g.32911564T>TAAG	BRCA2	LoF	p.K1026dupK	-/K	1026	+	ENST00000380152	3419.0	27
42	Very high	BRCA	c.6743_6745dupAGC	InFrameInsertion	2149	predicted	TIER 2	31	chr16:g.3778314_3778316dupTGC	chr16:g.3778302C>CGCT	CREBBP	LoF	p.Q2248dupQ	-/Q	2248	-	ENST00000262367	2443.0	31
42	Very high	BRCA	c.6741_6758dupGCAGCGCATGCAGCAGCA	InFrameInsertion	2145	predicted	TIER 2	31	chr16:g.3778302_3778319dupCGCTGCTGCTGCTGCATG	chr16:g.3778289A>ATGCTGCTGCATGCGCTGC	CREBBP	LoF	p.Q2247_Q2252dupQQRMQQ	-/QQRMQQ	2247	-	ENST00000262367	2443.0	31
42	Very high	BRCA	c.2014C>T	Nonsense	2008	predicted	TIER 2	17	chr7:g.101843371C>T	chr7:g.101843371C>T	CUX1	ambiguous	p.R672*	R/*	672	+	ENST00000360264	1517.0	24
42	Very high	BRCA	c.655C>T	Nonsense	1347	predicted	TIER 2	8	chr7:g.101758501C>T	chr7:g.101758501C>T	CUX1	ambiguous	p.R219*	R/*	219	+	ENST00000360264	1517.0	24
42	Very high	BRCA	c.1456G>T	Nonsense	4424	predicted	TIER 2	11	chr2:g.46605808G>T	chr2:g.46605808G>T	EPAS1	ambiguous	p.E486*	E/*	486	+	ENST00000263734	871.0	16
42	Very high	BRCA	c.21_23delGAA	InFrameDeletion	3562	predicted	TIER 2	1	chr2:g.46525071_46525073delGAA	chr2:g.46525066GAGA>G	EPAS1	ambiguous	p.K8delK	K/-	8	+	ENST00000263734	871.0	16
42	Very high	BRCA	c.1542_1543insTGCC	Frameshift	733	predicted	TIER 2	7	chr3:g.89448578_89448579insTGCC	chr3:g.89448575A>AGCCT	EPHA3	ambiguous	p.A515Cfs*12	A/.	515	+	ENST00000336596	984.0	17
42	Very high	BRCA	c.826G>T	Nonsense	1965	predicted	TIER 1	7	chr2:g.212587175C>A	chr2:g.212587175C>A	ERBB4	LoF	p.E276*	E/*	276	-	ENST00000342788	1309.0	28
42	Very high	BRCA	c.981_985delAGAGG	SpliceDonorDeletion	3738	predicted	TIER 1	6	chr4:g.153253748_153253752delCCTCT	chr4:g.153253747CCCTCT>C	FBXW7	LoF	.	./.	.	-	ENST00000281708	708.0	12
42	Very high	BRCA	c.9401_9403delAAG	InFrameDeletion	1677	predicted	TIER 2	9	chr4:g.126371572_126371574delAAG	chr4:g.126371567TGAA>T	FAT4	LoF	p.E3134delE	E/-	3134	+	ENST00000394329	4982.0	17
42	Very high	BRCA	c.677_682dupTGCCCG	InFrameInsertion	1847	predicted	TIER 2	3	chr10:g.8100703_8100708dupTGCCCG	chr10:g.8100700A>ACGTGCC	GATA3	LoF	p.V226_P227dupVP	-/VP	226	+	ENST00000379328	445.0	6
42	Very high	BRCA	c.4849G>T	Nonsense	4979	predicted	TIER 1	29	chr2:g.141607761C>A	chr2:g.141607761C>A	LRP1B	LoF	p.E1617*	E/*	1617	-	ENST00000389484	4600.0	91
42	Very high	BRCA	c.2842_2847dupACAACA	InFrameInsertion	3779	predicted	TIER 2	14	chr5:g.56177869_56177874dupACAACA	chr5:g.56177848T>TCAACAA	MAP3K1	LoF	p.T948_T949dupTT	-/TT	948	+	ENST00000399503	1513.0	20
42	Very high	BRCA	c.2845_2847dupACA	InFrameInsertion	3778	predicted	TIER 2	14	chr5:g.56177872_56177874dupACA	chr5:g.56177848T>TCAA	MAP3K1	LoF	p.T949dupT	-/T	949	+	ENST00000399503	1513.0	20
42	Very high	BRCA	c.2018_2020delTGG	InFrameDeletion	1222	predicted	TIER 2	13	chr2:g.141773436_141773438delCAC	chr2:g.141773434CCCA>C	LRP1B	LoF	p.V673delV	V/-	673	-	ENST00000389484	4600.0	91
42	Very high	BRCA	c.2652_2681dupTAGCTGTCCTGATGATCAGTTTAAATGCCA	InFrameInsertion	889	predicted	TIER 2	17	chr2:g.141747192_141747221dupGCATTTAAACTGATCATCAGGACAGCTATG	chr2:g.141747189C>CTGGCATTTAAACTGATCATCAGGACAGCTA	LRP1B	LoF	p.H884_C893dupHSCPDDQFKC	-/HSCPDDQFKC	884	-	ENST00000389484	4600.0	91
42	Very high	BRCA	c.3676C>T	Nonsense	416	predicted	TIER 1	23	chr2:g.141660579G>A	chr2:g.141660579G>A	LRP1B	LoF	p.Q1226*	Q/*	1226	-	ENST00000389484	4600.0	91
42	Very high	BRCA	c.4600C>T	Nonsense	4807	known	TIER 1	35	chr17:g.29588751C>T	chr17:g.29588751C>T	NF1	LoF	p.R1534*	R/*	1534	+	ENST00000358273	2840.0	58
42	Very high	BRCA	c.4084C>T	Nonsense	4581	known	TIER 1	30	chr17:g.29576111C>T	chr17:g.29576111C>T	NF1	LoF	p.R1362*	R/*	1362	+	ENST00000358273	2840.0	58
42	Very high	BRCA	c.4150G>T	Nonsense	4614	predicted	TIER 1	31	chr17:g.29579995G>T	chr17:g.29579995G>T	NF1	LoF	p.E1384*	E/*	1384	+	ENST00000358273	2840.0	58
42	Very high	BRCA	c.6855C>G	Nonsense	497	known	TIER 1	46	chr17:g.29665757C>G	chr17:g.29665757C>G	NF1	LoF	p.Y2285*	Y/*	2285	+	ENST00000358273	2840.0	58
42	Very high	BRCA	c.5512C>T	Nonsense	4922	predicted	TIER 2	31	chr1:g.120462204G>A	chr1:g.120462204G>A	NOTCH2	ambiguous	p.R1838*	R/*	1838	-	ENST00000256646	2472.0	34
42	Very high	BRCA	c.5242G>T	Nonsense	2752	predicted	TIER 2	32	chr4:g.87693989G>T	chr4:g.87693989G>T	PTPN13	ambiguous	p.E1748*	E/*	1748	+	ENST00000436978	2491.0	48
42	Very high	BRCA	c.3313G>T	Nonsense	2012	predicted	TIER 2	21	chr4:g.87679502G>T	chr4:g.87679502G>T	PTPN13	ambiguous	p.G1105*	G/*	1105	+	ENST00000436978	2491.0	48
42	Very high	BRCA	c.2839C>T	Nonsense	1808	predicted	TIER 2	18	chr4:g.87671811C>T	chr4:g.87671811C>T	PTPN13	ambiguous	p.Q947*	Q/*	947	+	ENST00000436978	2491.0	48
42	Very high	BRCA	c.2713C>T	Nonsense	1771	predicted	TIER 2	18	chr4:g.87671685C>T	chr4:g.87671685C>T	PTPN13	ambiguous	p.R905*	R/*	905	+	ENST00000436978	2491.0	48
42	Very high	BRCA	c.2143C>T	Nonsense	1520	predicted	TIER 2	14	chr4:g.87656020C>T	chr4:g.87656020C>T	PTPN13	ambiguous	p.Q715*	Q/*	715	+	ENST00000436978	2491.0	48
42	Very high	BRCA	c.331C>T	Nonsense	4251	predicted	TIER 2	5	chr1:g.241099902G>A	chr1:g.241099902G>A	RGS7	ambiguous	p.Q111*	Q/*	111	-	ENST00000366565	488.0	18
42	Very high	BRCA	c.1133_1156dupACACCTACCTGCCGCCGCCCTACC	InFrameInsertion	680	predicted	TIER 2	9	chr21:g.36164724_36164747dupGGCGGCGGCAGGTAGGTGTGGTAG	chr21:g.36164718G>GGGTAGGGCGGCGGCAGGTAGGTGT	RUNX1	ambiguous	p.H378_Y385dupHTYLPPPY	-/HTYLPPPY	378	-	ENST00000437180	481.0	9
42	Very high	BRCA	c.7038_7040delGAA	InFrameDeletion	2744	predicted	TIER 2	11	chr1:g.16259773_16259775delGAA	chr1:g.16259770CAAG>C	SPEN	ambiguous	p.K2347delK	K/-	2347	+	ENST00000375759	3665.0	15
42	Very high	BRCA	c.4546_4548delAAA	InFrameDeletion	2046	predicted	TIER 2	11	chr1:g.16257281_16257283delAAA	chr1:g.16257280TAAA>T	SPEN	ambiguous	p.K1516delK	K/-	1516	+	ENST00000375759	3665.0	15
42	Very high	BRCA	c.9611_9613delAAC	InFrameDeletion	4618	predicted	TIER 2	10	chr16:g.72822563_72822565delTTG	chr16:g.72822561GGTT>G	ZFHX3	LoF	p.Q3204delQ	Q/-	3204	-	ENST00000268489	3704.0	10
42	Very high	BRCA	c.9601_9618delCAGCAGCAGCAACCACAG	InFrameDeletion	4615	predicted	TIER 2	10	chr16:g.72822560_72822577delTGGTTGCTGCTGCTGCTG	chr16:g.72822556CCTGTGGTTGCTGCTGCTG>C	ZFHX3	LoF	p.Q3201_Q3206delQQQQPQ	QQQQPQ/-	3201	-	ENST00000268489	3704.0	10
42	Very high	BRCA	c.9608_9628dupAGCAACCACAGGTGCAGCAGC	InFrameInsertion	4610	predicted	TIER 2	10	chr16:g.72822555_72822575dupACCTGTGGTTGCTGCTGCTGC	chr16:g.72822546G>GGCTGCTGCACCTGTGGTTGCT	ZFHX3	LoF	p.Q3203_Q3209dupQQPQVQQ	-/QQPQVQQ	3203	-	ENST00000268489	3704.0	10
42	Very high	BRCA	c.9611_9628dupAACCACAGGTGCAGCAGC	InFrameInsertion	4611	predicted	TIER 2	10	chr16:g.72822555_72822572dupACCTGTGGTTGCTGCTGC	chr16:g.72822546G>GGCTGCTGCACCTGTGGTT	ZFHX3	LoF	p.Q3204_Q3209dupQPQVQQ	-/QPQVQQ	3204	-	ENST00000268489	3704.0	10
42	Very high	BRCA	c.10148_10168delTACAGCAGCAGCAGCAGCAAA	MultiAAMissense	4352	predicted	TIER 1	10	chr16:g.72822007_72822027delTTTGCTGCTGCTGCTGCTGTA	chr16:g.72822006TTTTGCTGCTGCTGCTGCTGTA>T	ZFHX3	LoF	p.L3383_K3390delinsQ	insQ/-	3383	-	ENST00000268489	3704.0	10
42	Very high	BRCA	c.10167_10184delAAAAGTGCAGCAGCAGCA	InFrameDeletion	4342	predicted	TIER 2	10	chr16:g.72822003_72822020delACTTTTTGCTGCTGCTGC	chr16:g.72821990CTGCTGCTGCTGCACTTTT>C	ZFHX3	LoF	p.K3390_Q3395delKVQQQQ	KVQQQQ/-	3390	-	ENST00000268489	3704.0	10
42	Very high	BRCA	c.10160_10186delAGCAGCAAAAAGTGCAGCAGCAGCAGC	InFrameDeletion	4339	predicted	TIER 2	10	chr16:g.72821999_72822025delCTGCACTTTTTGCTGCTGCTGCTGCTG	chr16:g.72821988GGCTGCTGCTGCTGCACTTTTTGCTGCT>G	ZFHX3	LoF	p.Q3387_Q3395delQQQKVQQQQ	QQQKVQQQQ/-	3387	-	ENST00000268489	3704.0	10
42	Very high	BRCA	c.10163_10186delAGCAAAAAGTGCAGCAGCAGCAGC	InFrameDeletion	4338	predicted	TIER 2	10	chr16:g.72822002_72822025delCACTTTTTGCTGCTGCTGCTGCTG	chr16:g.72821988GGCTGCTGCTGCTGCACTTTTTGCT>G	ZFHX3	LoF	p.Q3388_Q3395delQQKVQQQQ	QQKVQQQQ/-	3388	-	ENST00000268489	3704.0	10
42	Very high	BRCA	c.10166_10186delAAAAAGTGCAGCAGCAGCAGC	InFrameDeletion	4337	predicted	TIER 2	10	chr16:g.72822003_72822023delACTTTTTGCTGCTGCTGCTGC	chr16:g.72821988GGCTGCTGCTGCTGCACTTTTT>G	ZFHX3	LoF	p.Q3389_Q3395delQKVQQQQ	QKVQQQQ/-	3389	-	ENST00000268489	3704.0	10
42	Very high	BRCA	c.10172_10192dupTGCAGCAGCAGCAGCCCAAAG	InFrameInsertion	4329	predicted	TIER 2	10	chr16:g.72821987_72822007dupGGGCTGCTGCTGCTGCACTTT	chr16:g.72821982G>GCTTTGGGCTGCTGCTGCTGCA	ZFHX3	LoF	p.V3391_K3397dupVQQQQPK	-/VQQQQPK	3391	-	ENST00000268489	3704.0	10
42	Very high	BRCA	c.5165_5173delAGAAAGCCC	InFrameDeletion	2290	predicted	TIER 2	10	chr4:g.187542568_187542576delGGCTTTCTG	chr4:g.187542566AGGGCTTTCT>A	FAT1	LoF	p.Q1722_A1724delQKA	QKA/-	1722	-	ENST00000441802	4589.0	27
42	Very high	BRCA	c.12534_12548dupGGTCTTCCGCAAGAA	InFrameInsertion	3325	predicted	TIER 2	23	chr11:g.92616156_92616170dupGGTCTTCCGCAAGAA	chr11:g.92616141A>AGTCTTCCGCAAGAAG	FAT3	ambiguous	p.K4178_K4182dupKVFRK	-/KVFRK	4178	+	ENST00000298047	4590.0	27
42	Very high	BRCA	c.231_236delAGAAAC	InFrameDeletion	4241	predicted	TIER 2	2	chr7:g.152055695_152055700delTCTGTT	chr7:g.152055685CGTTTCT>C	MLL3	LoF	p.E78_T79delET	ET/-	78	-	ENST00000262189	4912.0	59
42	Very high	BRCA	c.8112_8114dupTGA	InFrameInsertion	1293	predicted	TIER 2	38	chr7:g.151874424_151874426dupTCA	chr7:g.151874423C>CTCA	MLL3	LoF	p.L2704_E2705insD	-/D	2704	-	ENST00000262189	4912.0	59
42	Very high	BRCA	c.10800_10802delGCA	InFrameDeletion	1298	predicted	TIER 2	39	chr12:g.49427693_49427695delGCT	chr12:g.49427685TTGC>T	MLL2	LoF	p.Q3612delQ	Q/-	3612	-	ENST00000301067	5538.0	54
42	Very high	BRCA	c.11168_11173dupTGCAGC	InFrameInsertion	1177	predicted	TIER 2	39	chr12:g.49427326_49427331dupAGCTGC	chr12:g.49427314T>TGCTGCA	MLL2	LoF	p.L3723_Q3724dupLQ	-/LQ	3723	-	ENST00000301067	5538.0	54
42	Very high	BRCA	c.11233_11277delCAGCACCTTCTAGGACAGGTGGCAATCCAGCAGCAACAGCAGCAG	InFrameDeletion	1141	predicted	TIER 2	39	chr12:g.49427229_49427273delGATTGCCACCTGTCCTAGAAGGTGCTGCTGCTGCTGTTGCTGCTG	chr12:g.49427210CCTGCTGCTGTTGCTGCTGGATTGCCACCTGTCCTAGAAGGTGCTG>C	MLL2	LoF	p.Q3745_Q3759delQHLLGQVAIQQQQQQ	QHLLGQVAIQQQQQQ/-	3745	-	ENST00000301067	5538.0	54
42	Very high	BRCA	c.11586_11588delACA	InFrameDeletion	1081	predicted	TIER 2	39	chr12:g.49426905_49426907delTTG	chr12:g.49426899CTGT>C	MLL2	LoF	p.Q3863delQ	Q/-	3863	-	ENST00000301067	5538.0	54
42	Very high	BRCA	c.12241C>T	Nonsense	867	predicted	TIER 1	39	chr12:g.49426247G>A	chr12:g.49426247G>A	MLL2	LoF	p.Q4081*	Q/*	4081	-	ENST00000301067	5538.0	54
42	Very high	BRCA	c.5151_5156dupACGGGA	InFrameInsertion	1376	predicted	TIER 2	35	chr17:g.15967457_15967462dupGTTCCC	chr17:g.15967446C>CTCCCGT	NCOR1	LoF	p.R1720_E1721dupRE	-/RE	1720	-	ENST00000268712	2441.0	46
42	Very high	BRCA	c.4356C>G	Nonsense	4857	predicted	TIER 2	36	chr8:g.69103966C>G	chr8:g.69103966C>G	PREX2	ambiguous	p.Y1452*	Y/*	1452	+	ENST00000288368	1607.0	40
42	Very high	BRCA	c.604C>T	Nonsense	2988	predicted	TIER 2	6	chr8:g.68942792C>T	chr8:g.68942792C>T	PREX2	ambiguous	p.Q202*	Q/*	202	+	ENST00000288368	1607.0	40
42	Very high	BRCA	c.544G>T	Nonsense	2975	predicted	TIER 2	6	chr8:g.68942732G>T	chr8:g.68942732G>T	PREX2	ambiguous	p.E182*	E/*	182	+	ENST00000288368	1607.0	40
42	Very high	BRCA	c.256G>T	Nonsense	2805	predicted	TIER 2	3	chr8:g.68931826G>T	chr8:g.68931826G>T	PREX2	ambiguous	p.E86*	E/*	86	+	ENST00000288368	1607.0	40
42	Very high	BRCA	c.1726_1731delACGAGA	InFrameDeletion	39	predicted	TIER 2	13	chr5:g.67591133_67591138delACGAGA	chr5:g.67591132GACGAGA>G	PIK3R1	LoF	p.T576_R577delTR	TR/-	576	+	ENST00000521381	725.0	16
42	Very high	BRCA	c.1714C>T	Nonsense	37	predicted	TIER 1	13	chr5:g.67591121C>T	chr5:g.67591121C>T	PIK3R1	LoF	p.Q572*	Q/*	572	+	ENST00000521381	725.0	16
42	Very high	BRCA	c.2689_2696delAAGCAGGC	Frameshift	2187	predicted	TIER 2	21	chr19:g.50918819_50918826delAAGCAGGC	chr19:g.50918815CGGCAAGCA>C	POLD1	ambiguous	p.K897Pfs*54	K/.	897	+	ENST00000440232	1108.0	27
42	Very high	BRCA	c.2064_2067dupACGG	Frameshift	1849	predicted	TIER 2	17	chr19:g.50912833_50912836dupACGG	chr19:g.50912830T>TGGAC	POLD1	ambiguous	p.Q690Tfs*50	Q/.	690	+	ENST00000440232	1108.0	27
42	Very high	BRCA	c.7695_7697delTTT	InFrameDeletion	207	predicted	TIER 2	9	chr16:g.72828886_72828888delAAA	chr16:g.72828883CAAA>C	ZFHX3	LoF	p.F2565delF	F/-	2565	-	ENST00000268489	3704.0	10
41	Very high	BRCA	c.5908C>T	Nonsense	3766	known	TIER 1	39	chr11:g.108181032C>T	chr11:g.108181032C>T	ATM	LoF	p.Q1970*	Q/*	1970	+	ENST00000278616	3057.0	63
41	Very high	BRCA	c.4396C>T	Nonsense	3099	known	TIER 1	29	chr11:g.108160488C>T	chr11:g.108160488C>T	ATM	LoF	p.R1466*	R/*	1466	+	ENST00000278616	3057.0	63
41	Very high	BRCA	c.4266_4269delTGAG	Frameshift	884	predicted	TIER 1	13	chr20:g.31024781_31024784delTGAG	chr20:g.31024778CAGTG>C	ASXL1	LoF	p.E1423Lfs*26	E/.	1423	+	ENST00000375687	1542.0	13
41	Very high	BRCA	c.2077C>T	Nonsense	207	predicted	TIER 1	13	chr20:g.31022592C>T	chr20:g.31022592C>T	ASXL1	LoF	p.R693*	R/*	693	+	ENST00000375687	1542.0	13
41	Very high	BRCA	c.1924G>T	Nonsense	153	predicted	TIER 1	13	chr20:g.31022439G>T	chr20:g.31022439G>T	ASXL1	LoF	p.G642*	G/*	642	+	ENST00000375687	1542.0	13
41	Very high	BRCA	c.1919_1929delCCATCGGAGGG	Frameshift	148	predicted	TIER 1	13	chr20:g.31022434_31022444delCCATCGGAGGG	chr20:g.31022432TGCCATCGGAGG>T	ASXL1	LoF	p.A640Gfs*14	A/.	640	+	ENST00000375687	1542.0	13
41	Very high	BRCA	c.1904_1905delAG	Frameshift	139	predicted	TIER 1	13	chr20:g.31022419_31022420delAG	chr20:g.31022414TAG>T	ASXL1	LoF	p.E635Gfs*22	E/.	635	+	ENST00000375687	1542.0	13
41	Very high	BRCA	c.7886_7890delTATTA	Frameshift	4690	predicted	TIER 1	53	chr11:g.108203586_108203590delTATTA	chr11:g.108203577CTTATA>C	ATM	LoF	p.I2629Sfs*25	I/.	2629	+	ENST00000278616	3057.0	63
41	Very high	BRCA	c.7517_7520delGAGA	SpliceAcceptorDeletion	4538	predicted	TIER 1	505151	chr11:g.108202172_108202175delGAGA	chr11:g.108202168TAGAG>T	ATM	LoF	.	./.	.	+	ENST00000278616	3057.0	63
41	Very high	BRCA	c.7449G>A	Nonsense	4485	predicted	TIER 1	50	chr11:g.108201082G>A	chr11:g.108201082G>A	ATM	LoF	p.W2483*	W/*	2483	+	ENST00000278616	3057.0	63
41	Very high	BRCA	c.5188C>T	Nonsense	3505	predicted	TIER 1	35	chr11:g.108172385C>T	chr11:g.108172385C>T	ATM	LoF	p.R1730*	R/*	1730	+	ENST00000278616	3057.0	63
41	Very high	BRCA	c.4525_4526insAGTA	Nonsense	3184	predicted	TIER 1	30	chr11:g.108163434_108163435insAGTA	chr11:g.108163434T>TAGTA	ATM	LoF	p.C1509*fs*1	C/.	1509	+	ENST00000278616	3057.0	63
41	Very high	BRCA	c.4373delG	Frameshift	3090	predicted	TIER 1	29	chr11:g.108160465delG	chr11:g.108160463AG>A	ATM	LoF	p.G1458Efs*15	G/.	1458	+	ENST00000278616	3057.0	63
41	Very high	BRCA	c.3837delG	Frameshift	2887	predicted	TIER 1	26	chr11:g.108155044delG	chr11:g.108155042TG>T	ATM	LoF	p.W1279*fs*1	W/.	1279	+	ENST00000278616	3057.0	63
41	Very high	BRCA	c.3663G>A	Nonsense	2829	predicted	TIER 1	25	chr11:g.108153523G>A	chr11:g.108153523G>A	ATM	LoF	p.W1221*	W/*	1221	+	ENST00000278616	3057.0	63
41	Very high	BRCA	c.3542_3543delAA	Frameshift	2771	predicted	TIER 1	24	chr11:g.108151861_108151862delAA	chr11:g.108151859GAA>G	ATM	LoF	p.K1181Rfs*18	K/.	1181	+	ENST00000278616	3057.0	63
41	Very high	BRCA	c.2050C>T	Nonsense	440	known	TIER 1	16	chr3:g.52436624G>A	chr3:g.52436624G>A	BAP1	LoF	p.Q684*	Q/*	684	-	ENST00000460680	730.0	17
41	Very high	BRCA	c.1951_1953delAAG	InFrameDeletion	496	predicted	TIER 2	15	chr3:g.52436825_52436827delCTT	chr3:g.52436824CCTT>C	BAP1	LoF	p.K651delK	K/-	651	-	ENST00000460680	730.0	17
41	Very high	BRCA	c.5068A>T	Nonsense	2945	predicted	TIER 1	16	chr17:g.41219631T>A	chr17:g.41219631T>A	BRCA1	LoF	p.K1690*	K/*	1690	-	ENST00000357654	1864.0	23
41	Very high	BRCA	c.7426_7428delGAA	InFrameDeletion	2363	predicted	TIER 2	14	chr13:g.32929416_32929418delGAA	chr13:g.32929409TGAA>T	BRCA2	LoF	p.E2476delE	E/-	2476	+	ENST00000380152	3419.0	27
41	Very high	BRCA	c.6821_6823delGAG	InFrameDeletion	2102	predicted	TIER 2	11	chr13:g.32915313_32915315delGAG	chr13:g.32915309AGAG>A	BRCA2	LoF	p.G2274delG	G/-	2274	+	ENST00000380152	3419.0	27
41	Very high	BRCA	c.3076_3077delAA	Frameshift	968	predicted	TIER 1	11	chr13:g.32911568_32911569delAA	chr13:g.32911567GAA>G	BRCA2	LoF	p.K1026Efs*9	K/.	1026	+	ENST00000380152	3419.0	27
41	Very high	BRCA	c.1755_1759delGAAAA	Frameshift	568	predicted	TIER 1	10	chr13:g.32907370_32907374delGAAAA	chr13:g.32907365AAAAAG>A	BRCA2	LoF	p.K585Nfs*3	K/.	585	+	ENST00000380152	3419.0	27
41	Very high	BRCA	c.1488_1494delCGAGGAC	Frameshift	3776	predicted	TIER 1	10	chr16:g.68849585_68849591delCGAGGAC	chr16:g.68849583TCCGAGGA>T	CDH1	LoF	p.E497Lfs*23	E/.	497	+	ENST00000261769	883.0	16
41	Very high	BRCA	c.2483_2484insCGAAATGAAGAATACTGGCTTATATTTGAAATACTTGAATCATCCAACAGCCTTTTATTTTATGTTCT	Frameshift	3960	predicted	TIER 1	14	chr16:g.3820967_3820968insAGAACATAAAATAAAAGGCTGTTGGATGATTCAAGTATTTCAAATATAAGCCAGTATTCTTCATTTCG	chr16:g.3820967A>AAGAACATAAAATAAAAGGCTGTTGGATGATTCAAGTATTTCAAATATAAGCCAGTATTCTTCATTTCG	CREBBP	LoF	p.L829Efs*43	L/.	829	-	ENST00000262367	2443.0	31
41	Very high	BRCA	c.5969_5977delCCCCGGGGA	InFrameDeletion	2455	predicted	TIER 2	31	chr16:g.3779076_3779084delGGGGTCCCC	chr16:g.3779070CTCCCCGGGG>C	CREBBP	LoF	p.T1990_G1992delTPG	TPG/-	1990	-	ENST00000262367	2443.0	31
41	Very high	BRCA	c.6384_6401dupACCCCAGCCTGGCATGCA	InFrameInsertion	2323	predicted	TIER 2	31	chr16:g.3778655_3778672dupAGGCTGGGGTTGCATGCC	chr16:g.3778646G>GTGCATGCCAGGCTGGGGT	CREBBP	LoF	p.Q2128_M2133dupQPQPGM	-/QPQPGM	2128	-	ENST00000262367	2443.0	31
41	Very high	BRCA	c.6600_6608delGCAGCAGCA	InFrameDeletion	2234	predicted	TIER 2	31	chr16:g.3778446_3778454delTGCTGCTGC	chr16:g.3778439TTGCTGCTGC>T	CREBBP	LoF	p.Q2214_Q2216delQQQ	QQQ/-	2214	-	ENST00000262367	2443.0	31
41	Very high	BRCA	c.6603_6608delGCAGCA	InFrameDeletion	2233	predicted	TIER 2	31	chr16:g.3778449_3778454delTGCTGC	chr16:g.3778439TTGCTGC>T	CREBBP	LoF	p.Q2215_Q2216delQQ	QQ/-	2215	-	ENST00000262367	2443.0	31
41	Very high	BRCA	c.6612_6623dupGCAGCAGCAACA	InFrameInsertion	2222	predicted	TIER 2	31	chr16:g.3778439_3778450dupTTGCTGCTGCTG	chr16:g.3778424T>TTGTTGCTGCTGC	CREBBP	LoF	p.Q2213_Q2216dupQQQQ	-/QQQQ	2213	-	ENST00000262367	2443.0	31
41	Very high	BRCA	c.6623_6624insGCAGCAGCAAC	Frameshift	2221	predicted	TIER 1	31	chr16:g.3778424_3778425insGTTGCTGCTGC	chr16:g.3778424T>TGTTGCTGCTGC	CREBBP	LoF	p.Q2212Hfs*94	Q/.	2212	-	ENST00000262367	2443.0	31
41	Very high	BRCA	c.6621_6629delACAACAGCA	InFrameDeletion	2214	predicted	TIER 2	31	chr16:g.3778424_3778432delTTGTTGCTG	chr16:g.3778418CTGCTGTTGT>C	CREBBP	LoF	p.Q2214_Q2216delQQQ	QQQ/-	2214	-	ENST00000262367	2443.0	31
41	Very high	BRCA	c.6618_6632delGCAACAACAGCAGCA	InFrameDeletion	2211	predicted	TIER 2	31	chr16:g.3778427_3778441delTTGCTGCTGCTGTTG	chr16:g.3778415TTGCTGCTGTTGTTGC>T	CREBBP	LoF	p.Q2212_Q2216delQQQQQ	QQQQQ/-	2212	-	ENST00000262367	2443.0	31
41	Very high	BRCA	c.6624_6635delACAGCAGCAACA	InFrameDeletion	2208	predicted	TIER 2	31	chr16:g.3778424_3778435delTTGTTGCTGCTG	chr16:g.3778412CTGTTGCTGCTGT>C	CREBBP	LoF	p.Q2213_Q2216delQQQQ	QQQQ/-	2213	-	ENST00000262367	2443.0	31
41	Very high	BRCA	c.6633_6635delACA	InFrameDeletion	2205	predicted	TIER 2	31	chr16:g.3778415_3778417delTTG	chr16:g.3778412CTGT>C	CREBBP	LoF	p.Q2216delQ	Q/-	2216	-	ENST00000262367	2443.0	31
41	Very high	BRCA	c.6633_6635dupACA	InFrameInsertion	2207	predicted	TIER 2	31	chr16:g.3778415_3778417dupTTG	chr16:g.3778412C>CTGT	CREBBP	LoF	p.Q2216dupQ	-/Q	2216	-	ENST00000262367	2443.0	31
41	Very high	BRCA	c.6633_6638delACAGCA	InFrameDeletion	2203	predicted	TIER 2	31	chr16:g.3778415_3778420delTTGCTG	chr16:g.3778409CTGCTGT>C	CREBBP	LoF	p.Q2215_Q2216delQQ	QQ/-	2215	-	ENST00000262367	2443.0	31
41	Very high	BRCA	c.6633_6638dupACAGCA	InFrameInsertion	2204	predicted	TIER 2	31	chr16:g.3778415_3778420dupTTGCTG	chr16:g.3778409C>CTGCTGT	CREBBP	LoF	p.Q2215_Q2216dupQQ	-/QQ	2215	-	ENST00000262367	2443.0	31
41	Very high	BRCA	c.6633_6641delACAGCAGCA	InFrameDeletion	2202	predicted	TIER 2	31	chr16:g.3778418_3778426delCTGCTGTTG	chr16:g.3778406CTGCTGCTGT>C	CREBBP	LoF	p.Q2214_Q2216delQQQ	QQQ/-	2214	-	ENST00000262367	2443.0	31
41	Very high	BRCA	c.6621_6644dupACAACAGCAGCAACAGCAGCAGCA	InFrameInsertion	2196	predicted	TIER 2	31	chr16:g.3778424_3778447dupTTGTTGCTGCTGCTGTTGCTGCTG	chr16:g.3778403C>CTGCTGCTGCTGTTGCTGCTGTTGT	CREBBP	LoF	p.Q2209_Q2216dupQQQQQQQQ	-/QQQQQQQQ	2209	-	ENST00000262367	2443.0	31
41	Very high	BRCA	c.6633_6644dupACAGCAGCAGCA	InFrameInsertion	2195	predicted	TIER 2	31	chr16:g.3778412_3778423dupCTGTTGCTGCTG	chr16:g.3778403C>CTGCTGCTGCTGT	CREBBP	LoF	p.Q2213_Q2216dupQQQQ	-/QQQQ	2213	-	ENST00000262367	2443.0	31
41	Very high	BRCA	c.6645_6647dupGCA	InFrameInsertion	2194	predicted	TIER 2	31	chr16:g.3778412_3778414dupCTG	chr16:g.3778400T>TTGC	CREBBP	LoF	p.Q2216dupQ	-/Q	2216	-	ENST00000262367	2443.0	31
41	Very high	BRCA	c.3259C>T	Nonsense	2519	predicted	TIER 2	21	chr7:g.101870742C>T	chr7:g.101870742C>T	CUX1	ambiguous	p.Q1087*	Q/*	1087	+	ENST00000360264	1517.0	24
41	Very high	BRCA	c.137_143delTCGAACA	Frameshift	1024	predicted	TIER 2	2	chr7:g.101559468_101559474delTCGAACA	chr7:g.101559466TATCGAAC>T	CUX1	ambiguous	p.I46Rfs*17	I/.	46	+	ENST00000360264	1517.0	24
41	Very high	BRCA	c.474_482delAAGCAAAGA	MultiAAMissense	3861	predicted	TIER 1	5	chr2:g.46587796_46587804delAAGCAAAGA	chr2:g.46587794AAAAGCAAAG>A	EPAS1	ambiguous	p.K158_D161delinsN	insN/-	158	+	ENST00000263734	871.0	16
41	Very high	BRCA	c.46A>T	Nonsense	3620	predicted	TIER 2	2	chr2:g.46574031A>T	chr2:g.46574031A>T	EPAS1	ambiguous	p.K16*	K/*	16	+	ENST00000263734	871.0	16
41	Very high	BRCA	c.1528C>T	Nonsense	729	predicted	TIER 2	7	chr3:g.89448564C>T	chr3:g.89448564C>T	EPHA3	ambiguous	p.R510*	R/*	510	+	ENST00000336596	984.0	17
41	Very high	BRCA	c.3539_3541dupTTC	InFrameInsertion	488	predicted	TIER 2	28	chr2:g.212248727_212248729dupAAG	chr2:g.212248725T>TGAA	ERBB4	LoF	p.L1180dupL	-/L	1180	-	ENST00000342788	1309.0	28
41	Very high	BRCA	c.1216_1226delATGTCCTCCTC	Frameshift	745	predicted	TIER 1	2	chr14:g.38060767_38060777delAGGACATGAGG	chr14:g.38060762CGAGGAGGACAT>C	FOXA1	LoF	p.M406Gfs*5	M/.	406	-	ENST00000250448	473.0	2
41	Very high	BRCA	c.5065_5076delATCCATGGAATC	InFrameDeletion	4884	predicted	TIER 2	30	chr2:g.141598525_141598536delGATTCCATGGAT	chr2:g.141598524CGATTCCATGGAT>C	LRP1B	LoF	p.I1689_I1692delIHGI	IHGI/-	1689	-	ENST00000389484	4600.0	91
41	Very high	BRCA	c.5086C>T	Nonsense	4879	predicted	TIER 1	30	chr2:g.141598515G>A	chr2:g.141598515G>A	LRP1B	LoF	p.Q1696*	Q/*	1696	-	ENST00000389484	4600.0	91
41	Very high	BRCA	c.6147T>G	Nonsense	4408	predicted	TIER 1	38	chr2:g.141459999A>C	chr2:g.141459999A>C	LRP1B	LoF	p.Y2049*	Y/*	2049	-	ENST00000389484	4600.0	91
41	Very high	BRCA	c.2140_2154delGCCTATTACGATCAT	InFrameDeletion	1183	predicted	TIER 2	13	chr2:g.141773303_141773317delGATCGTAATAGGCAT	chr2:g.141773300TATGATCGTAATAGGC>T	LRP1B	LoF	p.A714_H718delAYYDH	AYYDH/-	714	-	ENST00000389484	4600.0	91
41	Very high	BRCA	c.3212G>A	Nonsense	591	predicted	TIER 1	21	chr2:g.141680641C>T	chr2:g.141680641C>T	LRP1B	LoF	p.W1071*	W/*	1071	-	ENST00000389484	4600.0	91
41	Very high	BRCA	c.4390C>T	Nonsense	156	predicted	TIER 1	27	chr2:g.141625348G>A	chr2:g.141625348G>A	LRP1B	LoF	p.R1464*	R/*	1464	-	ENST00000389484	4600.0	91
41	Very high	BRCA	c.5356C>T	Nonsense	4987	predicted	TIER 2	30	chr1:g.120462975G>A	chr1:g.120462975G>A	NOTCH2	ambiguous	p.R1786*	R/*	1786	-	ENST00000256646	2472.0	34
41	Very high	BRCA	c.6365_6382dupAGGCAAAGGATGCCAAGG	InFrameInsertion	4620	predicted	TIER 2	34	chr1:g.120458971_120458988dupTCCTTTGCCTCCTTGGCA	chr1:g.120458962C>CCCTTGGCATCCTTTGCCT	NOTCH2	ambiguous	p.E2122_K2127dupEAKDAK	-/EAKDAK	2122	-	ENST00000256646	2472.0	34
41	Very high	BRCA	c.1294delC	Frameshift	4863	predicted	TIER 1	10	chr5:g.67589306delC	chr5:g.67589304AC>A	PIK3R1	LoF	p.Q432Nfs*14	Q/.	432	+	ENST00000521381	725.0	16
41	Very high	BRCA	c.6456_6458delTGA	InFrameDeletion	3275	predicted	TIER 2	42	chr4:g.87720293_87720295delTGA	chr4:g.87720283CTGA>C	PTPN13	ambiguous	p.D2152delD	D/-	2152	+	ENST00000436978	2491.0	48
41	Very high	BRCA	c.5614C>T	Nonsense	2883	predicted	TIER 2	34	chr4:g.87696414C>T	chr4:g.87696414C>T	PTPN13	ambiguous	p.R1872*	R/*	1872	+	ENST00000436978	2491.0	48
41	Very high	BRCA	c.5336T>A	Nonsense	2775	predicted	TIER 2	32	chr4:g.87694083T>A	chr4:g.87694083T>A	PTPN13	ambiguous	p.L1779*	L/*	1779	+	ENST00000436978	2491.0	48
41	Very high	BRCA	c.3070dupT	SpliceAcceptorInsertion	1892	predicted	TIER 2	-	chr4:g.87672181dupT	chr4:g.87672179G>GT	PTPN13	ambiguous	.	./.	.	+	ENST00000436978	2491.0	48
41	Very high	BRCA	c.2344C>T	Nonsense	1623	predicted	TIER 2	16	chr4:g.87662826C>T	chr4:g.87662826C>T	PTPN13	ambiguous	p.R782*	R/*	782	+	ENST00000436978	2491.0	48
41	Very high	BRCA	c.217G>T	Nonsense	257	predicted	TIER 1	4	chr10:g.89690810G>T	chr10:g.89690810G>T	PTEN	LoF	p.E73*	E/*	73	+	ENST00000371953	404.0	9
41	Very high	BRCA	c.985C>T	Nonsense	3830	predicted	TIER 2	14	chr1:g.240975315G>A	chr1:g.240975315G>A	RGS7	ambiguous	p.R329*	R/*	329	-	ENST00000366565	488.0	18
41	Very high	BRCA	c.1285C>T	Nonsense	3792	predicted	TIER 1	11	chr18:g.45368317G>A	chr18:g.45368317G>A	SMAD2	LoF	p.Q429*	Q/*	429	-	ENST00000402690	468.0	11
41	Very high	BRCA	c.8642_8660delCCACCCATTCCACGTTGGT	Frameshift	3185	predicted	TIER 2	11	chr1:g.16261377_16261395delCCACCCATTCCACGTTGGT	chr1:g.16261376GCCACCCATTCCACGTTGGT>G	SPEN	ambiguous	p.A2881Dfs*2	A/.	2881	+	ENST00000375759	3665.0	15
41	Very high	BRCA	c.7903C>T	Nonsense	2965	predicted	TIER 2	11	chr1:g.16260638C>T	chr1:g.16260638C>T	SPEN	ambiguous	p.Q2635*	Q/*	2635	+	ENST00000375759	3665.0	15
41	Very high	BRCA	c.9576_9590delTCAGCAACCCCCCCA	InFrameDeletion	4635	predicted	TIER 2	10	chr16:g.72822585_72822599delTGGGGGGGTTGCTGA	chr16:g.72822584CTGGGGGGGTTGCTGA>C	ZFHX3	LoF	p.P3195_Q3199delPPQQQ	PPQQQ/-	3195	-	ENST00000268489	3704.0	10
41	Very high	BRCA	c.9600_9611delGCAGCAGCAGCA	InFrameDeletion	4626	predicted	TIER 2	10	chr16:g.72822575_72822586delCTGCTGCTGCTG	chr16:g.72822563TTGCTGCTGCTGC>T	ZFHX3	LoF	p.Q3201_Q3204delQQQQ	QQQQ/-	3201	-	ENST00000268489	3704.0	10
41	Very high	BRCA	c.9603_9611delGCAGCAGCA	InFrameDeletion	4625	predicted	TIER 2	10	chr16:g.72822578_72822586delCTGCTGCTG	chr16:g.72822563TTGCTGCTGC>T	ZFHX3	LoF	p.Q3202_Q3204delQQQ	QQQ/-	3202	-	ENST00000268489	3704.0	10
41	Very high	BRCA	c.9612_9626delACCACAGGTGCAGCA	InFrameDeletion	4613	predicted	TIER 2	10	chr16:g.72822555_72822569delACCTGTGGTTGCTGC	chr16:g.72822548CTGCTGCACCTGTGGT>C	ZFHX3	LoF	p.Q3206_P3210delQVQQP	QVQQP/-	3206	-	ENST00000268489	3704.0	10
41	Very high	BRCA	c.10136_10141delAGCAGC	InFrameDeletion	4384	predicted	TIER 2	10	chr16:g.72822044_72822049delCTGCTG	chr16:g.72822033CGCTGCT>C	ZFHX3	LoF	p.Q3379_Q3380delQQ	QQ/-	3379	-	ENST00000268489	3704.0	10
41	Very high	BRCA	c.10139_10141delAGC	InFrameDeletion	4383	predicted	TIER 2	10	chr16:g.72822047_72822049delCTG	chr16:g.72822033CGCT>C	ZFHX3	LoF	p.Q3380delQ	Q/-	3380	-	ENST00000268489	3704.0	10
41	Very high	BRCA	c.10136_10141dupAGCAGC	InFrameInsertion	4381	predicted	TIER 2	10	chr16:g.72822044_72822049dupCTGCTG	chr16:g.72822033C>CGCTGCT	ZFHX3	LoF	p.Q3379_Q3380dupQQ	-/QQ	3379	-	ENST00000268489	3704.0	10
41	Very high	BRCA	c.10139_10141dupAGC	InFrameInsertion	4380	predicted	TIER 2	10	chr16:g.72822047_72822049dupCTG	chr16:g.72822033C>CGCT	ZFHX3	LoF	p.Q3380dupQ	-/Q	3380	-	ENST00000268489	3704.0	10
41	Very high	BRCA	c.10152_10153insGAGCAG	InFrameInsertion	4373	predicted	TIER 2	10	chr16:g.72822025_72822026insCTCCTG	chr16:g.72822022G>GCTGCTC	ZFHX3	LoF	p.Q3384_Q3385insEQ	-/EQ	3384	-	ENST00000268489	3704.0	10
41	Very high	BRCA	c.10125_10154delTCAGCAGCAGCAGCAGCGGCAACTACAGCA	MultiAAMissense	4372	predicted	TIER 1	10	chr16:g.72822021_72822050delTGCTGTAGTTGCCGCTGCTGCTGCTGCTGA	chr16:g.72822020CTGCTGTAGTTGCCGCTGCTGCTGCTGCTGA>C	ZFHX3	LoF	p.I3375_Q3385delinsM	insM/-	3375	-	ENST00000268489	3704.0	10
41	Very high	BRCA	c.10142_10156delGGCAACTACAGCAGC	InFrameDeletion	4370	predicted	TIER 2	10	chr16:g.72822026_72822040delTAGTTGCCGCTGCTG	chr16:g.72822018TGCTGCTGTAGTTGCC>T	ZFHX3	LoF	p.R3381_Q3385delRQLQQ	RQLQQ/-	3381	-	ENST00000268489	3704.0	10
41	Very high	BRCA	c.10142_10159delGGCAACTACAGCAGCAGC	InFrameDeletion	4367	predicted	TIER 2	10	chr16:g.72822026_72822043delTAGTTGCCGCTGCTGCTG	chr16:g.72822015TGCTGCTGCTGTAGTTGCC>T	ZFHX3	LoF	p.R3381_Q3386delRQLQQQ	RQLQQQ/-	3381	-	ENST00000268489	3704.0	10
41	Very high	BRCA	c.10142_10159dupGGCAACTACAGCAGCAGC	InFrameInsertion	4366	predicted	TIER 2	10	chr16:g.72822026_72822043dupTAGTTGCCGCTGCTGCTG	chr16:g.72822015T>TGCTGCTGCTGTAGTTGCC	ZFHX3	LoF	p.R3381_Q3386dupRQLQQQ	-/RQLQQQ	3381	-	ENST00000268489	3704.0	10
41	Very high	BRCA	c.10142_10162delGGCAACTACAGCAGCAGCAGC	InFrameDeletion	4365	predicted	TIER 2	10	chr16:g.72822026_72822046delTAGTTGCCGCTGCTGCTGCTG	chr16:g.72822012TGCTGCTGCTGCTGTAGTTGCC>T	ZFHX3	LoF	p.R3381_Q3387delRQLQQQQ	RQLQQQQ/-	3381	-	ENST00000268489	3704.0	10
41	Very high	BRCA	c.10142_10162dupGGCAACTACAGCAGCAGCAGC	InFrameInsertion	4364	predicted	TIER 2	10	chr16:g.72822026_72822046dupTAGTTGCCGCTGCTGCTGCTG	chr16:g.72822012T>TGCTGCTGCTGCTGTAGTTGCC	ZFHX3	LoF	p.R3381_Q3387dupRQLQQQQ	-/RQLQQQQ	3381	-	ENST00000268489	3704.0	10
41	Very high	BRCA	c.10146_10163delACTACAGCAGCAGCAGCA	InFrameDeletion	4363	predicted	TIER 2	10	chr16:g.72822015_72822032delTGCTGCTGCTGTAGTTGC	chr16:g.72822011CTGCTGCTGCTGCTGTAGT>C	ZFHX3	LoF	p.L3383_Q3388delLQQQQQ	LQQQQQ/-	3383	-	ENST00000268489	3704.0	10
41	Very high	BRCA	c.10142_10165delGGCAACTACAGCAGCAGCAGCAGC	InFrameDeletion	4361	predicted	TIER 2	10	chr16:g.72822026_72822049delTAGTTGCCGCTGCTGCTGCTGCTG	chr16:g.72822009TGCTGCTGCTGCTGCTGTAGTTGCC>T	ZFHX3	LoF	p.R3381_Q3388delRQLQQQQQ	RQLQQQQQ/-	3381	-	ENST00000268489	3704.0	10
41	Very high	BRCA	c.10148_10165delTACAGCAGCAGCAGCAGC	InFrameDeletion	4360	predicted	TIER 2	10	chr16:g.72822011_72822028delCTGCTGCTGCTGCTGTAG	chr16:g.72822009TGCTGCTGCTGCTGCTGTA>T	ZFHX3	LoF	p.L3383_Q3388delLQQQQQ	LQQQQQ/-	3383	-	ENST00000268489	3704.0	10
41	Very high	BRCA	c.10142_10165dupGGCAACTACAGCAGCAGCAGCAGC	InFrameInsertion	4359	predicted	TIER 2	10	chr16:g.72822026_72822049dupTAGTTGCCGCTGCTGCTGCTGCTG	chr16:g.72822009T>TGCTGCTGCTGCTGCTGTAGTTGCC	ZFHX3	LoF	p.R3381_Q3388dupRQLQQQQQ	-/RQLQQQQQ	3381	-	ENST00000268489	3704.0	10
41	Very high	BRCA	c.10140_10166delGCGGCAACTACAGCAGCAGCAGCAGCA	InFrameDeletion	4358	predicted	TIER 2	10	chr16:g.72822023_72822049delCTGTAGTTGCCGCTGCTGCTGCTGCTG	chr16:g.72822008TTGCTGCTGCTGCTGCTGTAGTTGCCGC>T	ZFHX3	LoF	p.R3381_Q3389delRQLQQQQQQ	RQLQQQQQQ/-	3381	-	ENST00000268489	3704.0	10
41	Very high	BRCA	c.10164_10166delGCA	InFrameDeletion	4357	predicted	TIER 2	10	chr16:g.72822023_72822025delCTG	chr16:g.72822008TTGC>T	ZFHX3	LoF	p.Q3389delQ	Q/-	3389	-	ENST00000268489	3704.0	10
41	Very high	BRCA	c.10158_10166dupGCAGCAGCA	InFrameInsertion	4356	predicted	TIER 2	10	chr16:g.72822017_72822025dupCTGCTGCTG	chr16:g.72822008T>TTGCTGCTGC	ZFHX3	LoF	p.Q3387_Q3389dupQQQ	-/QQQ	3387	-	ENST00000268489	3704.0	10
41	Very high	BRCA	c.10161_10166dupGCAGCA	InFrameInsertion	4355	predicted	TIER 2	10	chr16:g.72822020_72822025dupCTGCTG	chr16:g.72822008T>TTGCTGC	ZFHX3	LoF	p.Q3388_Q3389dupQQ	-/QQ	3388	-	ENST00000268489	3704.0	10
41	Very high	BRCA	c.10164_10166dupGCA	InFrameInsertion	4354	predicted	TIER 2	10	chr16:g.72822023_72822025dupCTG	chr16:g.72822008T>TTGC	ZFHX3	LoF	p.Q3389dupQ	-/Q	3389	-	ENST00000268489	3704.0	10
41	Very high	BRCA	c.10147_10167delCTACAGCAGCAGCAGCAGCAA	InFrameDeletion	4353	predicted	TIER 2	10	chr16:g.72822012_72822032delTGCTGCTGCTGCTGTAGTTGC	chr16:g.72822007TTTGCTGCTGCTGCTGCTGTAG>T	ZFHX3	LoF	p.L3383_Q3389delLQQQQQQ	LQQQQQQ/-	3383	-	ENST00000268489	3704.0	10
41	Very high	BRCA	c.10167_10181delAAAAGTGCAGCAGCA	InFrameDeletion	4344	predicted	TIER 2	10	chr16:g.72822003_72822017delACTTTTTGCTGCTGC	chr16:g.72821993CTGCTGCTGCACTTTT>C	ZFHX3	LoF	p.K3390_Q3394delKVQQQ	KVQQQ/-	3390	-	ENST00000268489	3704.0	10
41	Very high	BRCA	c.10167_10181dupAAAAGTGCAGCAGCA	InFrameInsertion	4343	predicted	TIER 2	10	chr16:g.72822003_72822017dupACTTTTTGCTGCTGC	chr16:g.72821993C>CTGCTGCTGCACTTTT	ZFHX3	LoF	p.K3390_Q3394dupKVQQQ	-/KVQQQ	3390	-	ENST00000268489	3704.0	10
41	Very high	BRCA	c.10167_10184dupAAAAGTGCAGCAGCAGCA	InFrameInsertion	4341	predicted	TIER 2	10	chr16:g.72822003_72822020dupACTTTTTGCTGCTGCTGC	chr16:g.72821990C>CTGCTGCTGCTGCACTTTT	ZFHX3	LoF	p.K3390_Q3395dupKVQQQQ	-/KVQQQQ	3390	-	ENST00000268489	3704.0	10
41	Very high	BRCA	c.10181_10186delAGCAGC	InFrameDeletion	4336	predicted	TIER 2	10	chr16:g.72821997_72822002delTGCTGC	chr16:g.72821988GGCTGCT>G	ZFHX3	LoF	p.Q3394_Q3395delQQ	QQ/-	3394	-	ENST00000268489	3704.0	10
41	Very high	BRCA	c.10163_10186dupAGCAAAAAGTGCAGCAGCAGCAGC	InFrameInsertion	4334	predicted	TIER 2	10	chr16:g.72822002_72822025dupCACTTTTTGCTGCTGCTGCTGCTG	chr16:g.72821988G>GGCTGCTGCTGCTGCACTTTTTGCT	ZFHX3	LoF	p.Q3388_Q3395dupQQKVQQQQ	-/QQKVQQQQ	3388	-	ENST00000268489	3704.0	10
41	Very high	BRCA	c.10166_10186dupAAAAAGTGCAGCAGCAGCAGC	InFrameInsertion	4333	predicted	TIER 2	10	chr16:g.72822003_72822023dupACTTTTTGCTGCTGCTGCTGC	chr16:g.72821988G>GGCTGCTGCTGCTGCACTTTTT	ZFHX3	LoF	p.Q3389_Q3395dupQKVQQQQ	-/QKVQQQQ	3389	-	ENST00000268489	3704.0	10
41	Very high	BRCA	c.10267_10269delGAA	InFrameDeletion	4288	predicted	TIER 2	10	chr16:g.72821910_72821912delTCT	chr16:g.72821905GTTC>G	ZFHX3	LoF	p.E3423delE	E/-	3423	-	ENST00000268489	3704.0	10
41	Very high	BRCA	c.4204_4206delGAG	InFrameDeletion	3452	predicted	TIER 2	18	chr6:g.157521932_157521934delGAG	chr6:g.157521929CAGG>C	ARID1B	LoF	p.E1402delE	E/-	1402	+	ENST00000346085	2250.0	20
41	Very high	BRCA	c.5334_5336delAGA	InFrameDeletion	1162	predicted	TIER 2	20	chr1:g.27105723_27105725delAGA	chr1:g.27105714GGAA>G	ARID1A	LoF	p.E1780delE	E/-	1780	+	ENST00000324856	2286.0	20
41	Very high	BRCA	c.3412C>T	Nonsense	3063	predicted	TIER 1	3	chr4:g.187584621G>A	chr4:g.187584621G>A	FAT1	LoF	p.Q1138*	Q/*	1138	-	ENST00000441802	4589.0	27
41	Very high	BRCA	c.3616G>T	Nonsense	2984	predicted	TIER 1	4	chr4:g.187560902C>A	chr4:g.187560902C>A	FAT1	LoF	p.E1206*	E/*	1206	-	ENST00000441802	4589.0	27
41	Very high	BRCA	c.4603C>T	Nonsense	2496	predicted	TIER 1	9	chr4:g.187549515G>A	chr4:g.187549515G>A	FAT1	LoF	p.R1535*	R/*	1535	-	ENST00000441802	4589.0	27
41	Very high	BRCA	c.7841C>A	Nonsense	1491	predicted	TIER 1	10	chr4:g.187539899G>T	chr4:g.187539899G>T	FAT1	LoF	p.S2614*	S/*	2614	-	ENST00000441802	4589.0	27
41	Very high	BRCA	c.5578C>T	Nonsense	979	predicted	TIER 2	9	chr11:g.92531757C>T	chr11:g.92531757C>T	FAT3	ambiguous	p.Q1860*	Q/*	1860	+	ENST00000298047	4590.0	27
41	Very high	BRCA	c.7196_7198delAGA	InFrameDeletion	1594	predicted	TIER 2	37	chr7:g.151877169_151877171delTCT	chr7:g.151877162ATCT>A	MLL3	LoF	p.K2399delK	K/-	2399	-	ENST00000262189	4912.0	59
41	Very high	BRCA	c.10411_10413delCAG	InFrameDeletion	571	predicted	TIER 2	43	chr7:g.151860252_151860254delCTG	chr7:g.151860248ACTG>A	MLL3	LoF	p.Q3471delQ	Q/-	3471	-	ENST00000262189	4912.0	59
41	Very high	BRCA	c.11037_11042delATTAGA	InFrameDeletion	398	predicted	TIER 2	43	chr7:g.151859623_151859628delAATTCT	chr7:g.151859619CTCTAAT>C	MLL3	LoF	p.L3680_E3681delLE	LE/-	3680	-	ENST00000262189	4912.0	59
41	Very high	BRCA	c.10185_10202dupATTGGCAATGCAGCAGCA	InFrameInsertion	1552	predicted	TIER 2	34	chr12:g.49430943_49430960dupTGCATTGCCAATTGCTGC	chr12:g.49430936C>CTGCTGCTGCATTGCCAAT	MLL2	LoF	p.M3398_A3403dupMQQQLA	-/MQQQLA	3398	-	ENST00000301067	5538.0	54
41	Very high	BRCA	c.11697_11732dupGCTTCAGCAGCAGCAGCAGCTGCAACAGCAACAGCA	InFrameInsertion	1043	predicted	TIER 2	39	chr12:g.49426762_49426797dupTGCTGTTGCAGCTGCTGCTGCTGCTGAAGCTGCTGT	chr12:g.49426755T>TTGCTGTTGCTGTTGCAGCTGCTGCTGCTGCTGAAGC	MLL2	LoF	p.L3906_Q3917dupLQQQQQLQQQQQ	-/LQQQQQLQQQQQ	3906	-	ENST00000301067	5538.0	54
41	Very high	BRCA	c.682C>T	Nonsense	3007	predicted	TIER 2	6	chr8:g.68942870C>T	chr8:g.68942870C>T	PREX2	ambiguous	p.Q228*	Q/*	228	+	ENST00000288368	1607.0	40
41	Very high	BRCA	c.681G>A	Nonsense	3006	predicted	TIER 2	6	chr8:g.68942869G>A	chr8:g.68942869G>A	PREX2	ambiguous	p.W227*	W/*	227	+	ENST00000288368	1607.0	40
41	Very high	BRCA	c.522C>A	Nonsense	2934	predicted	TIER 2	5	chr8:g.68939537C>A	chr8:g.68939537C>A	PREX2	ambiguous	p.C174*	C/*	174	+	ENST00000288368	1607.0	40
41	Very high	BRCA	c.89_90delAG	Frameshift	2692	predicted	TIER 2	1	chr8:g.68864718_68864719delAG	chr8:g.68864716CGA>C	PREX2	ambiguous	p.E30Afs*32	E/.	30	+	ENST00000288368	1607.0	40
41	Very high	BRCA	c.2979_2980insCAGCTCACGGGCAAG	InFrameInsertion	2382	predicted	TIER 2	24	chr19:g.50919892_50919893insCAGCTCACGGGCAAG	chr19:g.50919891C>CGCAGCTCACGGGCAA	POLD1	ambiguous	p.T993_V994insQLTGK	-/QLTGK	993	+	ENST00000440232	1108.0	27
41	Very high	BRCA	c.2284C>T	Nonsense	1988	predicted	TIER 2	19	chr19:g.50917032C>T	chr19:g.50917032C>T	POLD1	ambiguous	p.R762*	R/*	762	+	ENST00000440232	1108.0	27
41	Very high	BRCA	c.3073_3075delAAC	InFrameDeletion	1848	predicted	TIER 2	3	chr16:g.72984510_72984512delTTG	chr16:g.72984508CGTT>C	ZFHX3	LoF	p.N1025delN	N/-	1025	-	ENST00000268489	3704.0	10
41	Very high	BRCA	c.4477_4479delAAG	InFrameDeletion	1201	predicted	TIER 2	9	chr16:g.72832102_72832104delCTT	chr16:g.72832101CCTT>C	ZFHX3	LoF	p.K1493delK	K/-	1493	-	ENST00000268489	3704.0	10
41	Very high	BRCA	c.6985C>T	Nonsense	431	predicted	TIER 1	9	chr16:g.72829596G>A	chr16:g.72829596G>A	ZFHX3	LoF	p.Q2329*	Q/*	2329	-	ENST00000268489	3704.0	10
41	Very high	BRCA	c.7045_7047delAAG	InFrameDeletion	417	predicted	TIER 2	9	chr16:g.72829539_72829541delTCT	chr16:g.72829533GCTT>G	ZFHX3	LoF	p.K2349delK	K/-	2349	-	ENST00000268489	3704.0	10
40	Very high	BRCA	c.4852C>T	Nonsense	3327	known	TIER 1	32	chr11:g.108165729C>T	chr11:g.108165729C>T	ATM	LoF	p.R1618*	R/*	1618	+	ENST00000278616	3057.0	63
40	Very high	BRCA	c.4507C>T	Nonsense	3178	known	TIER 1	30	chr11:g.108163416C>T	chr11:g.108163416C>T	ATM	LoF	p.Q1503*	Q/*	1503	+	ENST00000278616	3057.0	63
40	Very high	BRCA	c.1873C>T	Nonsense	129	predicted	TIER 1	13	chr20:g.31022388C>T	chr20:g.31022388C>T	ASXL1	LoF	p.R625*	R/*	625	+	ENST00000375687	1542.0	13
40	Very high	BRCA	c.1873dupC	Frameshift	127	predicted	TIER 1	13	chr20:g.31022388dupC	chr20:g.31022386T>TC	ASXL1	LoF	p.R625Pfs*10	R/.	625	+	ENST00000375687	1542.0	13
40	Very high	BRCA	c.1609G>T	Nonsense	19	predicted	TIER 1	12	chr20:g.31021610G>T	chr20:g.31021610G>T	ASXL1	LoF	p.E537*	E/*	537	+	ENST00000375687	1542.0	13
40	Very high	BRCA	c.5383_5384delTG	Frameshift	3582	predicted	TIER 1	36	chr11:g.108173643_108173644delTG	chr11:g.108173640CTG>C	ATM	LoF	p.W1795Dfs*5	W/.	1795	+	ENST00000278616	3057.0	63
40	Very high	BRCA	c.4844_4848delAGGAT	Frameshift	3325	predicted	TIER 1	32	chr11:g.108165721_108165725delAGGAT	chr11:g.108165720AAGGAT>A	ATM	LoF	p.K1615Tfs*9	K/.	1615	+	ENST00000278616	3057.0	63
40	Very high	BRCA	c.4842_4843insCT	Frameshift	3324	predicted	TIER 1	32	chr11:g.108165719_108165720insCT	chr11:g.108165719A>ACT	ATM	LoF	p.K1615Lfs*19	K/.	1615	+	ENST00000278616	3057.0	63
40	Very high	BRCA	c.4732C>T	Nonsense	3262	predicted	TIER 1	31	chr11:g.108164160C>T	chr11:g.108164160C>T	ATM	LoF	p.Q1578*	Q/*	1578	+	ENST00000278616	3057.0	63
40	Very high	BRCA	c.4019_4029delTACCAGAGATT	Frameshift	2955	predicted	TIER 1	27	chr11:g.108158352_108158362delTACCAGAGATT	chr11:g.108158348AATTTACCAGAG>A	ATM	LoF	p.L1340Cfs*10	L/.	1340	+	ENST00000278616	3057.0	63
40	Very high	BRCA	c.3510dupA	Frameshift	2759	predicted	TIER 1	24	chr11:g.108151829dupA	chr11:g.108151824G>GA	ATM	LoF	p.Q1171Tfs*8	Q/.	1171	+	ENST00000278616	3057.0	63
40	Very high	BRCA	c.1290_1291delTG	Frameshift	1641	predicted	TIER 1	10	chr11:g.108121482_108121483delTG	chr11:g.108121479CTG>C	ATM	LoF	p.C430*fs*1	C/.	430	+	ENST00000278616	3057.0	63
40	Very high	BRCA	c.3661G>T	Nonsense	3530	known	TIER 1	10	chr17:g.41243887C>A	chr17:g.41243887C>A	BRCA1	LoF	p.E1221*	E/*	1221	-	ENST00000357654	1864.0	23
40	Very high	BRCA	c.1201_1212delTATGAGGATGAC	InFrameDeletion	844	predicted	TIER 2	12	chr3:g.52438518_52438529delAGTCATCCTCAT	chr3:g.52438506CGTCATCCTCATA>C	BAP1	LoF	p.Y401_D404delYEDD	YEDD/-	401	-	ENST00000460680	730.0	17
40	Very high	BRCA	c.3626delT	Frameshift	3550	predicted	TIER 1	10	chr17:g.41243923delA	chr17:g.41243921TA>T	BRCA1	LoF	p.L1209*fs*1	L/.	1209	-	ENST00000357654	1864.0	23
40	Very high	BRCA	c.3627dupA	Frameshift	3548	predicted	TIER 1	10	chr17:g.41243921dupT	chr17:g.41243920C>CT	BRCA1	LoF	p.E1210Rfs*9	E/.	1210	-	ENST00000357654	1864.0	23
40	Very high	BRCA	c.8478C>A	Nonsense	2789	known	TIER 1	19	chr13:g.32944685C>A	chr13:g.32944685C>A	BRCA2	LoF	p.Y2826*	Y/*	2826	+	ENST00000380152	3419.0	27
40	Very high	BRCA	c.5978T>G	Nonsense	1843	known	TIER 1	11	chr13:g.32914470T>G	chr13:g.32914470T>G	BRCA2	LoF	p.L1993*	L/*	1993	+	ENST00000380152	3419.0	27
40	Very high	BRCA	c.7433dupT	Frameshift	2365	predicted	TIER 1	14	chr13:g.32929423dupT	chr13:g.32929420C>CT	BRCA2	LoF	p.L2478Ffs*19	L/.	2478	+	ENST00000380152	3419.0	27
40	Very high	BRCA	c.5079dupT	Nonsense	1545	predicted	TIER 1	11	chr13:g.32913571dupT	chr13:g.32913569C>CT	BRCA2	LoF	p.R1694*fs*1	R/.	1694	+	ENST00000380152	3419.0	27
40	Very high	BRCA	c.1414C>T	Nonsense	2563	predicted	TIER 1	8	chr2:g.202149973C>T	chr2:g.202149973C>T	CASP8	LoF	p.R472*	R/*	472	+	ENST00000358485	539.0	9
40	Very high	BRCA	c.1315A>T	Nonsense	4614	predicted	TIER 1	5	chr16:g.3841997T>A	chr16:g.3841997T>A	CREBBP	LoF	p.K439*	K/*	439	-	ENST00000262367	2443.0	31
40	Very high	BRCA	c.6361_6396delCTCCAGTCCCAGCCCGGCATGCAACCCCAGCCTGGC	InFrameDeletion	2326	predicted	TIER 2	31	chr16:g.3778664_3778699delTTGCATGCCGGGCTGGGACTGGAGGCCAGGCTGGGG	chr16:g.3778651TGCCAGGCTGGGGTTGCATGCCGGGCTGGGACTGGAG>T	CREBBP	LoF	p.L2121_G2132delLQSQPGMQPQPG	LQSQPGMQPQPG/-	2121	-	ENST00000262367	2443.0	31
40	Very high	BRCA	c.6597_6608delGCAGCAGCAGCA	InFrameDeletion	2235	predicted	TIER 2	31	chr16:g.3778443_3778454delTGCTGCTGCTGC	chr16:g.3778439TTGCTGCTGCTGC>T	CREBBP	LoF	p.Q2213_Q2216delQQQQ	QQQQ/-	2213	-	ENST00000262367	2443.0	31
40	Very high	BRCA	c.6606_6608dupGCA	InFrameInsertion	2232	predicted	TIER 2	31	chr16:g.3778452_3778454dupTGC	chr16:g.3778439T>TTGC	CREBBP	LoF	p.Q2216dupQ	-/Q	2216	-	ENST00000262367	2443.0	31
40	Very high	BRCA	c.6608_6609insGC	Frameshift	2231	predicted	TIER 1	31	chr16:g.3778439_3778440insGC	chr16:g.3778439T>TGC	CREBBP	LoF	p.Q2204Hfs*99	Q/.	2204	-	ENST00000262367	2443.0	31
40	Very high	BRCA	c.6609_6610insG	Frameshift	2229	predicted	TIER 1	31	chr16:g.3778438_3778439insC	chr16:g.3778438G>GC	CREBBP	LoF	p.Q2204Afs*137	Q/.	2204	-	ENST00000262367	2443.0	31
40	Very high	BRCA	c.6609_6611dupACA	InFrameInsertion	2228	predicted	TIER 2	31	chr16:g.3778439_3778441dupTTG	chr16:g.3778436C>CTGT	CREBBP	LoF	p.Q2216dupQ	-/Q	2216	-	ENST00000262367	2443.0	31
40	Very high	BRCA	c.6606_6620delGCAACAGCAGCAGCA	InFrameDeletion	2226	predicted	TIER 2	31	chr16:g.3778439_3778453delTTGCTGCTGCTGCTG	chr16:g.3778427TTGCTGCTGCTGTTGC>T	CREBBP	LoF	p.Q2212_Q2216delQQQQQ	QQQQQ/-	2212	-	ENST00000262367	2443.0	31
40	Very high	BRCA	c.6618_6620dupGCA	InFrameInsertion	2225	predicted	TIER 2	31	chr16:g.3778436_3778438dupCTG	chr16:g.3778427T>TTGC	CREBBP	LoF	p.Q2216dupQ	-/Q	2216	-	ENST00000262367	2443.0	31
40	Very high	BRCA	c.6612_6623delGCAGCAGCAACA	InFrameDeletion	2223	predicted	TIER 2	31	chr16:g.3778439_3778450delTTGCTGCTGCTG	chr16:g.3778424TTGTTGCTGCTGC>T	CREBBP	LoF	p.Q2213_Q2216delQQQQ	QQQQ/-	2213	-	ENST00000262367	2443.0	31
40	Very high	BRCA	c.1300C>T	Nonsense	584	predicted	TIER 2	5	chr3:g.89391234C>T	chr3:g.89391234C>T	EPHA3	ambiguous	p.Q434*	Q/*	434	+	ENST00000336596	984.0	17
40	Very high	BRCA	c.1038_1057delTTGGCCCCTGGACACAGGAG	Frameshift	503	predicted	TIER 2	5	chr3:g.89390972_89390991delTTGGCCCCTGGACACAGGAG	chr3:g.89390967TGGAGTTGGCCCCTGGACACA>T	EPHA3	ambiguous	p.S346Rfs*12	S/.	346	+	ENST00000336596	984.0	17
40	Very high	BRCA	c.820C>T	Nonsense	418	predicted	TIER 2	4	chr3:g.89390071C>T	chr3:g.89390071C>T	EPHA3	ambiguous	p.R274*	R/*	274	+	ENST00000336596	984.0	17
40	Very high	BRCA	c.3205G>T	Nonsense	624	predicted	TIER 1	27	chr2:g.212251854C>A	chr2:g.212251854C>A	ERBB4	LoF	p.G1069*	G/*	1069	-	ENST00000342788	1309.0	28
40	Very high	BRCA	c.3424C>T	Nonsense	560	predicted	TIER 1	27	chr2:g.212251635G>A	chr2:g.212251635G>A	ERBB4	LoF	p.R1142*	R/*	1142	-	ENST00000342788	1309.0	28
40	Very high	BRCA	c.862-9_863delTTTTCTTAGTT	SpliceAcceptorDeletion	3760	predicted	TIER 1	656	chr4:g.153253872_153253882delCTAAGAAAAAA	chr4:g.153253869CAACTAAGAAAA>C	FBXW7	LoF	.	./.	.	-	ENST00000281708	708.0	12
40	Very high	BRCA	c.13603A>T	Nonsense	3005	predicted	TIER 1	17	chr4:g.126411580A>T	chr4:g.126411580A>T	FAT4	LoF	p.K4535*	K/*	4535	+	ENST00000394329	4982.0	17
40	Very high	BRCA	c.2929C>T	Nonsense	3817	predicted	TIER 1	14	chr5:g.56177956C>T	chr5:g.56177956C>T	MAP3K1	LoF	p.Q977*	Q/*	977	+	ENST00000399503	1513.0	20
40	Very high	BRCA	c.1553_1567delCACAGCAGCAAACCG	InFrameDeletion	3309	predicted	TIER 2	9	chr5:g.56168699_56168713delCACAGCAGCAAACCG	chr5:g.56168697TGCACAGCAGCAAACC>T	MAP3K1	LoF	p.A518_T522delAQQQT	AQQQT/-	518	+	ENST00000399503	1513.0	20
40	Very high	BRCA	c.992delG	Frameshift	3066	predicted	TIER 1	4	chr5:g.56160718delG	chr5:g.56160716AG>A	MAP3K1	LoF	p.G331Efs*31	G/.	331	+	ENST00000399503	1513.0	20
40	Very high	BRCA	c.793_794delGA	Frameshift	2987	predicted	TIER 1	3	chr5:g.56155701_56155702delGA	chr5:g.56155699CAG>C	MAP3K1	LoF	p.E265Ifs*35	E/.	265	+	ENST00000399503	1513.0	20
40	Very high	BRCA	c.3134_3136delAAG	SpliceDonorDeletion	646	predicted	TIER 1	20	chr2:g.141707807_141707809delCTT	chr2:g.141707803CCTT>C	LRP1B	LoF	.	./.	.	-	ENST00000389484	4600.0	91
40	Very high	BRCA	c.1439_1447delCCCGGGAAG	InFrameDeletion	797	predicted	TIER 2	10	chr11:g.64572212_64572220delCGGGCTTCC	chr11:g.64572206CCTTCCCGGG>C	MEN1	LoF	p.A480_E482delARE	ARE/-	480	-	ENST00000443283	616.0	10
40	Very high	BRCA	c.1780_1782delAAG	InFrameDeletion	720	predicted	TIER 2	10	chr11:g.64571876_64571878delTTC	chr11:g.64571871GCTT>G	MEN1	LoF	p.K594delK	K/-	594	-	ENST00000443283	616.0	10
40	Very high	BRCA	c.3916C>T	Nonsense	4498	predicted	TIER 1	29	chr17:g.29562981C>T	chr17:g.29562981C>T	NF1	LoF	p.R1306*	R/*	1306	+	ENST00000358273	2840.0	58
40	Very high	BRCA	c.6397_6399delAAG	InFrameDeletion	4616	predicted	TIER 2	34	chr1:g.120458950_120458952delTTC	chr1:g.120458945ACTT>A	NOTCH2	ambiguous	p.K2133delK	K/-	2133	-	ENST00000256646	2472.0	34
40	Very high	BRCA	c.845dupA	Nonsense	1731	predicted	TIER 2	5	chr1:g.120529612dupT	chr1:g.120529611G>GT	NOTCH2	ambiguous	p.Y282*fs*1	Y/.	282	-	ENST00000256646	2472.0	34
40	Very high	BRCA	c.901C>T	Nonsense	4562	predicted	TIER 1	7	chr5:g.67576819C>T	chr5:g.67576819C>T	PIK3R1	LoF	p.R301*	R/*	301	+	ENST00000521381	725.0	16
40	Very high	BRCA	c.5888T>A	Nonsense	2985	predicted	TIER 2	35	chr4:g.87696787T>A	chr4:g.87696787T>A	PTPN13	ambiguous	p.L1963*	L/*	1963	+	ENST00000436978	2491.0	48
40	Very high	BRCA	c.5597_5600delTCAG	Frameshift	2876	predicted	TIER 2	34	chr4:g.87696397_87696400delTCAG	chr4:g.87696393ACAGT>A	PTPN13	ambiguous	p.V1866Dfs*2	V/.	1866	+	ENST00000436978	2491.0	48
40	Very high	BRCA	c.3159T>A	Nonsense	1921	predicted	TIER 2	19	chr4:g.87672270T>A	chr4:g.87672270T>A	PTPN13	ambiguous	p.Y1053*	Y/*	1053	+	ENST00000436978	2491.0	48
40	Very high	BRCA	c.2873C>A	Nonsense	1813	predicted	TIER 2	18	chr4:g.87671845C>A	chr4:g.87671845C>A	PTPN13	ambiguous	p.S958*	S/*	958	+	ENST00000436978	2491.0	48
40	Very high	BRCA	c.1144C>T	Nonsense	1071	predicted	TIER 2	7	chr4:g.87622903C>T	chr4:g.87622903C>T	PTPN13	ambiguous	p.R382*	R/*	382	+	ENST00000436978	2491.0	48
40	Very high	BRCA	c.890_892delAGA	InFrameDeletion	984	predicted	TIER 2	7	chr4:g.87622649_87622651delAGA	chr4:g.87622641TAAG>T	PTPN13	ambiguous	p.K297delK	K/-	297	+	ENST00000436978	2491.0	48
40	Very high	BRCA	c.715_722delAAATCTAT	Frameshift	936	predicted	TIER 2	7	chr4:g.87622474_87622481delAAATCTAT	chr4:g.87622472GTAAATCTA>G	PTPN13	ambiguous	p.K239Gfs*11	K/.	239	+	ENST00000436978	2491.0	48
40	Very high	BRCA	c.1333C>T	Nonsense	2905	known	TIER 1	14	chr13:g.48953730C>T	chr13:g.48953730C>T	RB1	LoF	p.R445*	R/*	445	+	ENST00000267163	929.0	27
40	Very high	BRCA	c.1771C>T	Nonsense	1175	predicted	TIER 1	22	chr9:g.8504312G>A	chr9:g.8504312G>A	PTPRD	LoF	p.Q591*	Q/*	591	-	ENST00000381196	1913.0	43
40	Very high	BRCA	c.1303_1320delGTGAAGGCAAACCCCCAG	InFrameDeletion	2003	predicted	TIER 2	2	chr20:g.50407708_50407725delGTTTGCCTTCACCTGGGG	chr20:g.50407701GCTGGGGGTTTGCCTTCAC>G	SALL4	ambiguous	p.V435_Q440delVKANPQ	VKANPQ/-	435	-	ENST00000217086	1054.0	4
40	Very high	BRCA	c.917C>G	Nonsense	3964	predicted	TIER 1	8	chr18:g.45374926G>C	chr18:g.45374926G>C	SMAD2	LoF	p.S306*	S/*	306	-	ENST00000402690	468.0	11
40	Very high	BRCA	c.5638_5649delTCTAAAAACTCT	InFrameDeletion	2335	predicted	TIER 2	11	chr1:g.16258373_16258384delTCTAAAAACTCT	chr1:g.16258370GCTTCTAAAAACT>G	SPEN	ambiguous	p.S1880_S1883delSKNS	SKNS/-	1880	+	ENST00000375759	3665.0	15
40	Very high	BRCA	c.1484_1513delAGGGCCCCCTGCCTGGCCTCGGCTTCGCCC	InFrameDeletion	4205	predicted	TIER 2	7	chr12:g.115112231_115112260delGAAGCCGAGGCCAGGCAGGGGGCCCTGGGC	chr12:g.115112226GGGGCGAAGCCGAGGCCAGGCAGGGGGCCCT>G	TBX3	LoF	p.Q495_A504delQGPLPGLGFA	QGPLPGLGFA/-	495	-	ENST00000257566	744.0	8
40	Very high	BRCA	c.9603_9611dupGCAGCAGCA	InFrameInsertion	4622	predicted	TIER 2	10	chr16:g.72822578_72822586dupCTGCTGCTG	chr16:g.72822563T>TTGCTGCTGC	ZFHX3	LoF	p.Q3202_Q3204dupQQQ	-/QQQ	3202	-	ENST00000268489	3704.0	10
40	Very high	BRCA	c.9690_9692delGCA	InFrameDeletion	4579	predicted	TIER 2	10	chr16:g.72822491_72822493delCTG	chr16:g.72822482TTGC>T	ZFHX3	LoF	p.Q3231delQ	Q/-	3231	-	ENST00000268489	3704.0	10
40	Very high	BRCA	c.9704_9707dupAAGA	Frameshift	4569	predicted	TIER 1	10	chr16:g.72822469_72822472dupCTTT	chr16:g.72822467G>GTCTT	ZFHX3	LoF	p.D3236Efs*4	D/.	3236	-	ENST00000268489	3704.0	10
40	Very high	BRCA	c.10155_10156insAAG	InFrameInsertion	4371	predicted	TIER 2	10	chr16:g.72822021_72822022insTCT	chr16:g.72822019G>GCTT	ZFHX3	LoF	p.Q3385_Q3386insK	-/K	3385	-	ENST00000268489	3704.0	10
40	Very high	BRCA	c.10142_10156dupGGCAACTACAGCAGC	InFrameInsertion	4369	predicted	TIER 2	10	chr16:g.72822026_72822040dupTAGTTGCCGCTGCTG	chr16:g.72822018T>TGCTGCTGTAGTTGCC	ZFHX3	LoF	p.R3381_Q3385dupRQLQQ	-/RQLQQ	3381	-	ENST00000268489	3704.0	10
40	Very high	BRCA	c.10172_10177dupTGCAGC	InFrameInsertion	4348	predicted	TIER 2	10	chr16:g.72821998_72822003dupGCTGCA	chr16:g.72821997T>TGCTGCA	ZFHX3	LoF	p.Q3392_Q3393insLQ	-/LQ	3392	-	ENST00000268489	3704.0	10
40	Very high	BRCA	c.10184_10186dupAGC	InFrameInsertion	4332	predicted	TIER 2	10	chr16:g.72822000_72822002dupTGC	chr16:g.72821988G>GGCT	ZFHX3	LoF	p.Q3395dupQ	-/Q	3395	-	ENST00000268489	3704.0	10
40	Very high	BRCA	c.3990_4001delGCAGCAGCAGCA	InFrameDeletion	655	predicted	TIER 2	16	chr1:g.27100194_27100205delGCAGCAGCAGCA	chr1:g.27100181CGCAGCAGCAGCA>C	ARID1A	LoF	p.Q1331_Q1334delQQQQ	QQQQ/-	1331	+	ENST00000324856	2286.0	20
40	Very high	BRCA	c.3993_4001delGCAGCAGCA	InFrameDeletion	654	predicted	TIER 2	16	chr1:g.27100197_27100205delGCAGCAGCA	chr1:g.27100181CGCAGCAGCA>C	ARID1A	LoF	p.Q1332_Q1334delQQQ	QQQ/-	1332	+	ENST00000324856	2286.0	20
40	Very high	BRCA	c.2511_2525delCGGAGGTCAAATGCA	InFrameDeletion	77	predicted	TIER 2	8	chr1:g.27089555_27089569delCGGAGGTCAAATGCA	chr1:g.27089554CCGGAGGTCAAATGCA>C	ARID1A	LoF	p.G839_G843delGQMHG	GQMHG/-	839	+	ENST00000324856	2286.0	20
40	Very high	BRCA	c.3604A>T	Nonsense	2986	predicted	TIER 1	4	chr4:g.187560914T>A	chr4:g.187560914T>A	FAT1	LoF	p.K1202*	K/*	1202	-	ENST00000441802	4589.0	27
40	Very high	BRCA	c.4879C>T	Nonsense	2371	predicted	TIER 1	10	chr4:g.187542861G>A	chr4:g.187542861G>A	FAT1	LoF	p.R1627*	R/*	1627	-	ENST00000441802	4589.0	27
40	Very high	BRCA	c.7722delA	Frameshift	1522	predicted	TIER 1	10	chr4:g.187540018delT	chr4:g.187540017CT>C	FAT1	LoF	p.G2575Efs*8	G/.	2575	-	ENST00000441802	4589.0	27
40	Very high	BRCA	c.10327G>T	Nonsense	559	predicted	TIER 1	17	chr4:g.187527247C>A	chr4:g.187527247C>A	FAT1	LoF	p.G3443*	G/*	3443	-	ENST00000441802	4589.0	27
40	Very high	BRCA	c.3904G>T	Nonsense	374	predicted	TIER 2	4	chr11:g.92495256G>T	chr11:g.92495256G>T	FAT3	ambiguous	p.G1302*	G/*	1302	+	ENST00000298047	4590.0	27
40	Very high	BRCA	c.4459C>T	Nonsense	2587	predicted	TIER 1	29	chr7:g.151891573G>A	chr7:g.151891573G>A	MLL3	LoF	p.Q1487*	Q/*	1487	-	ENST00000262189	4912.0	59
40	Very high	BRCA	c.8007_8018delAACAACGTCTGA	InFrameDeletion	1314	predicted	TIER 2	38	chr7:g.151874527_151874538delTTGTTTCAGACG	chr7:g.151874519ATCAGACGTTGTT>A	MLL3	LoF	p.E2669_S2672delETTS	ETTS/-	2669	-	ENST00000262189	4912.0	59
40	Very high	BRCA	c.4641_4643delCGA	InFrameDeletion	3580	predicted	TIER 2	17	chr12:g.49439898_49439900delTCG	chr12:g.49439897ATCG>A	MLL2	LoF	p.D1548delD	D/-	1548	-	ENST00000301067	5538.0	54
40	Very high	BRCA	c.8107_8109delGAG	InFrameDeletion	2099	predicted	TIER 2	32	chr12:g.49433340_49433342delCCT	chr12:g.49433337TCTC>T	MLL2	LoF	p.E2703delE	E/-	2703	-	ENST00000301067	5538.0	54
40	Very high	BRCA	c.10832_10833insGCAGCAGCAGCAACA	InFrameInsertion	1284	predicted	TIER 2	39	chr12:g.49427657_49427658insTTGCTGCTGCTGCTG	chr12:g.49427655T>TTGTTGCTGCTGCTGC	MLL2	LoF	p.Q3608_Q3612dupQQQQQ	-/QQQQQ	3608	-	ENST00000301067	5538.0	54
40	Very high	BRCA	c.10830_10838delGCAACAGCA	InFrameDeletion	1279	predicted	TIER 2	39	chr12:g.49427652_49427660delCTGTTGCTG	chr12:g.49427649GTGCTGTTGC>G	MLL2	LoF	p.Q3610_Q3612delQQQ	QQQ/-	3610	-	ENST00000301067	5538.0	54
40	Very high	BRCA	c.10838_10839insACAACA	InFrameInsertion	1278	predicted	TIER 2	39	chr12:g.49427651_49427652insTTGTTG	chr12:g.49427649G>GTGTTGT	MLL2	LoF	p.Q3611_Q3612dupQQ	-/QQ	3611	-	ENST00000301067	5538.0	54
40	Very high	BRCA	c.11043_11051delGCAACAGCA	InFrameDeletion	1216	predicted	TIER 2	39	chr12:g.49427445_49427453delCTGCTGTTG	chr12:g.49427436TTGCTGTTGC>T	MLL2	LoF	p.Q3682_Q3684delQQQ	QQQ/-	3682	-	ENST00000301067	5538.0	54
40	Very high	BRCA	c.11052_11054dupACA	InFrameInsertion	1215	predicted	TIER 2	39	chr12:g.49427436_49427438dupTTG	chr12:g.49427433A>ATGT	MLL2	LoF	p.Q3684dupQ	-/Q	3684	-	ENST00000301067	5538.0	54
40	Very high	BRCA	c.11211_11222delGCAGCAGCAGCA	InFrameDeletion	1162	predicted	TIER 2	39	chr12:g.49427275_49427286delTGCTGCTGCTGC	chr12:g.49427265TTGCTGCTGCTGC>T	MLL2	LoF	p.Q3742_Q3745delQQQQ	QQQQ/-	3742	-	ENST00000301067	5538.0	54
40	Very high	BRCA	c.11214_11222delGCAGCAGCA	InFrameDeletion	1161	predicted	TIER 2	39	chr12:g.49427278_49427286delTGCTGCTGC	chr12:g.49427265TTGCTGCTGC>T	MLL2	LoF	p.Q3743_Q3745delQQQ	QQQ/-	3743	-	ENST00000301067	5538.0	54
40	Very high	BRCA	c.11217_11222delGCAGCA	InFrameDeletion	1160	predicted	TIER 2	39	chr12:g.49427281_49427286delTGCTGC	chr12:g.49427265TTGCTGC>T	MLL2	LoF	p.Q3744_Q3745delQQ	QQ/-	3744	-	ENST00000301067	5538.0	54
40	Very high	BRCA	c.11214_11237delGCAGCAGCAACAGCAGCAGCAGCA	InFrameDeletion	1152	predicted	TIER 2	39	chr12:g.49427263_49427286delTGTTGCTGCTGCTGCTGCTGCTGC	chr12:g.49427250GTGCTGCTGCTGCTGTTGCTGCTGC>G	MLL2	LoF	p.Q3738_Q3745delQQQQQQQQ	QQQQQQQQ/-	3738	-	ENST00000301067	5538.0	54
40	Very high	BRCA	c.11217_11237dupGCAGCAACAGCAGCAGCAGCA	InFrameInsertion	1148	predicted	TIER 2	39	chr12:g.49427265_49427285dupTTGCTGCTGCTGCTGCTGCTG	chr12:g.49427250G>GTGCTGCTGCTGCTGTTGCTGC	MLL2	LoF	p.Q3739_Q3745dupQQQQQQQ	-/QQQQQQQ	3739	-	ENST00000301067	5538.0	54
40	Very high	BRCA	c.11223_11237dupACAGCAGCAGCAGCA	InFrameInsertion	1147	predicted	TIER 2	39	chr12:g.49427265_49427279dupTTGCTGCTGCTGCTG	chr12:g.49427250G>GTGCTGCTGCTGCTGT	MLL2	LoF	p.Q3741_Q3745dupQQQQQ	-/QQQQQ	3741	-	ENST00000301067	5538.0	54
40	Very high	BRCA	c.11233_11277dupCAGCACCTTCTAGGACAGGTGGCAATCCAGCAGCAACAGCAGCAG	InFrameInsertion	1139	predicted	TIER 2	39	chr12:g.49427229_49427273dupGATTGCCACCTGTCCTAGAAGGTGCTGCTGCTGCTGTTGCTGCTG	chr12:g.49427210C>CCTGCTGCTGTTGCTGCTGGATTGCCACCTGTCCTAGAAGGTGCTG	MLL2	LoF	p.Q3745_Q3759dupQHLLGQVAIQQQQQQ	-/QHLLGQVAIQQQQQQ	3745	-	ENST00000301067	5538.0	54
40	Very high	BRCA	c.11714_11716delAGC	InFrameDeletion	1049	predicted	TIER 2	39	chr12:g.49426785_49426787delCTG	chr12:g.49426771AGCT>A	MLL2	LoF	p.Q3905delQ	Q/-	3905	-	ENST00000301067	5538.0	54
40	Very high	BRCA	c.11714_11716dupAGC	InFrameInsertion	1048	predicted	TIER 2	39	chr12:g.49426785_49426787dupCTG	chr12:g.49426771A>AGCT	MLL2	LoF	p.Q3905dupQ	-/Q	3905	-	ENST00000301067	5538.0	54
40	Very high	BRCA	c.12309_12311delGCA	InFrameDeletion	849	predicted	TIER 2	39	chr12:g.49426185_49426187delCTG	chr12:g.49426176TTGC>T	MLL2	LoF	p.Q4104delQ	Q/-	4104	-	ENST00000301067	5538.0	54
40	Very high	BRCA	c.5151_5156delACGGGA	InFrameDeletion	1378	predicted	TIER 2	35	chr17:g.15967457_15967462delGTTCCC	chr17:g.15967446CTCCCGT>C	NCOR1	LoF	p.R1720_E1721delRE	RE/-	1720	-	ENST00000268712	2441.0	46
40	Very high	BRCA	c.4405_4408delGTAG	Frameshift	4869	predicted	TIER 2	36	chr8:g.69104015_69104018delGTAG	chr8:g.69104014TGTAG>T	PREX2	ambiguous	p.V1469Ifs*3	V/.	1469	+	ENST00000288368	1607.0	40
40	Very high	BRCA	c.2330delG	Frameshift	3869	predicted	TIER 2	21	chr8:g.69005919delG	chr8:g.69005917TG>T	PREX2	ambiguous	p.G777Efs*12	G/.	777	+	ENST00000288368	1607.0	40
40	Very high	BRCA	c.1014G>A	Nonsense	3185	predicted	TIER 2	9	chr8:g.68965402G>A	chr8:g.68965402G>A	PREX2	ambiguous	p.W338*	W/*	338	+	ENST00000288368	1607.0	40
40	Very high	BRCA	c.20_31dupGAGACAGCCGCG	InFrameInsertion	2669	predicted	TIER 2	1	chr8:g.68864649_68864660dupGAGACAGCCGCG	chr8:g.68864638G>GGACAGCCGCGGA	PREX2	ambiguous	p.G7_R10dupGDSR	-/GDSR	7	+	ENST00000288368	1607.0	40
40	Very high	BRCA	c.1790G>A	Nonsense	76	predicted	TIER 1	14	chr5:g.67591292G>A	chr5:g.67591292G>A	PIK3R1	LoF	p.W597*	W/*	597	+	ENST00000521381	725.0	16
40	Very high	BRCA	c.3350_3361dupGCCTGCGAAAGC	InFrameInsertion	1708	predicted	TIER 2	4	chr16:g.72923717_72923728dupGCTTTCGCAGGC	chr16:g.72923716A>AGCTTTCGCAGGC	ZFHX3	LoF	p.K1120_L1121insRLRK	-/RLRK	1120	-	ENST00000268489	3704.0	10
40	Very high	BRCA	c.3551_3559dupAGGAGCTGA	InFrameInsertion	1594	predicted	TIER 2	6	chr16:g.72845910_72845918dupAGCTCCTTC	chr16:g.72845907G>GTCAGCTCCT	ZFHX3	LoF	p.K1184_L1186dupKEL	-/KEL	1184	-	ENST00000268489	3704.0	10
40	Very high	BRCA	c.5382_5384delGCA	InFrameDeletion	912	predicted	TIER 2	9	chr16:g.72831208_72831210delCTG	chr16:g.72831196GTGC>G	ZFHX3	LoF	p.Q1794delQ	Q/-	1794	-	ENST00000268489	3704.0	10
40	Very high	BRCA	c.5382_5384dupGCA	InFrameInsertion	913	predicted	TIER 2	9	chr16:g.72831208_72831210dupCTG	chr16:g.72831196G>GTGC	ZFHX3	LoF	p.Q1794dupQ	-/Q	1794	-	ENST00000268489	3704.0	10
39	Very high	BRCA	c.1339C>T	Nonsense	1654	known	TIER 1	10	chr11:g.108121531C>T	chr11:g.108121531C>T	ATM	LoF	p.R447*	R/*	447	+	ENST00000278616	3057.0	63
39	Very high	BRCA	c.2155delG	Frameshift	227	predicted	TIER 1	13	chr20:g.31022670delG	chr20:g.31022669AG>A	ASXL1	LoF	p.E719Rfs*6	E/.	719	+	ENST00000375687	1542.0	13
39	Very high	BRCA	c.8036_8051delATCTGGTGACTATACA	Frameshift	4802	predicted	TIER 1	55	chr11:g.108205721_108205736delATCTGGTGACTATACA	chr11:g.108205719AAATCTGGTGACTATAC>A	ATM	LoF	p.N2679Sfs*9	N/.	2679	+	ENST00000278616	3057.0	63
39	Very high	BRCA	c.3693_3695delATC	MultiAAMissense	2837	predicted	TIER 1	25	chr11:g.108153553_108153555delATC	chr11:g.108153552TATC>T	ATM	LoF	p.L1231_S1232delinsF	insF/-	1231	+	ENST00000278616	3057.0	63
39	Very high	BRCA	c.3292C>T	Nonsense	2656	predicted	TIER 1	23	chr11:g.108150225C>T	chr11:g.108150225C>T	ATM	LoF	p.Q1098*	Q/*	1098	+	ENST00000278616	3057.0	63
39	Very high	BRCA	c.3173G>A	Nonsense	2584	predicted	TIER 1	22	chr11:g.108143468G>A	chr11:g.108143468G>A	ATM	LoF	p.W1058*	W/*	1058	+	ENST00000278616	3057.0	63
39	Very high	BRCA	c.1924_1926delGAA	InFrameDeletion	1905	predicted	TIER 2	13	chr11:g.108124566_108124568delGAA	chr11:g.108124560AAAG>A	ATM	LoF	p.E642delE	E/-	642	+	ENST00000278616	3057.0	63
39	Very high	BRCA	c.1027_1030delGAAA	Frameshift	1501	predicted	TIER 1	8	chr11:g.108117816_108117819delGAAA	chr11:g.108117812CAAAG>C	ATM	LoF	p.E343Ifs*2	E/.	343	+	ENST00000278616	3057.0	63
39	Very high	BRCA	c.992delA	Frameshift	1486	predicted	TIER 1	8	chr11:g.108117781delA	chr11:g.108117778GA>G	ATM	LoF	p.K331Sfs*15	K/.	331	+	ENST00000278616	3057.0	63
39	Very high	BRCA	c.666_678delAGAAAAGAGCTCT	Frameshift	1372	predicted	TIER 1	7	chr11:g.108115518_108115530delAGAAAAGAGCTCT	chr11:g.108115517AAGAAAAGAGCTCT>A	ATM	LoF	p.Q222Hfs*4	Q/.	222	+	ENST00000278616	3057.0	63
39	Very high	BRCA	c.9027T>G	Nonsense	3085	known	TIER 1	23	chr13:g.32953960T>G	chr13:g.32953960T>G	BRCA2	LoF	p.Y3009*	Y/*	3009	+	ENST00000380152	3419.0	27
39	Very high	BRCA	c.10094_10095insGAATTATAT	InFrameInsertion	3537	predicted	TIER 2	27	chr13:g.32972744_32972745insGAATTATAT	chr13:g.32972743G>GTGAATTATA	BRCA2	LoF	p.V3365_S3366insNYI	-/NYI	3365	+	ENST00000380152	3419.0	27
39	Very high	BRCA	c.9026_9030delATCAT	Frameshift	3084	predicted	TIER 1	23	chr13:g.32953959_32953963delATCAT	chr13:g.32953957TTATCA>T	BRCA2	LoF	p.Y3009Sfs*7	Y/.	3009	+	ENST00000380152	3419.0	27
39	Very high	BRCA	c.5290_5291delTC	Frameshift	1617	predicted	TIER 1	11	chr13:g.32913782_32913783delTC	chr13:g.32913777ATC>A	BRCA2	LoF	p.S1764Kfs*3	S/.	1764	+	ENST00000380152	3419.0	27
39	Very high	BRCA	c.4933_4935delAAA	InFrameDeletion	1509	predicted	TIER 2	11	chr13:g.32913425_32913427delAAA	chr13:g.32913422GAAA>G	BRCA2	LoF	p.K1645delK	K/-	1645	+	ENST00000380152	3419.0	27
39	Very high	BRCA	c.3046G>T	Nonsense	954	predicted	TIER 1	11	chr13:g.32911538G>T	chr13:g.32911538G>T	BRCA2	LoF	p.E1016*	E/*	1016	+	ENST00000380152	3419.0	27
39	Very high	BRCA	c.1480C>T	Nonsense	2572	predicted	TIER 1	8	chr2:g.202150039C>T	chr2:g.202150039C>T	CASP8	LoF	p.R494*	R/*	494	+	ENST00000358485	539.0	9
39	Very high	BRCA	c.119_120delAG	Frameshift	4413	predicted	TIER 1	1	chr12:g.12870892_12870893delAG	chr12:g.12870889AAG>A	CDKN1B	LoF	p.E40Vfs*84	E/.	40	+	ENST00000228872	199.0	3
39	Very high	BRCA	c.2075_2095delCCCCTGTGATTCCACAGGCAC	InFrameDeletion	4248	predicted	TIER 2	10	chr16:g.3828031_3828051delTGCCTGTGGAATCACAGGGGG	chr16:g.3828029TGTGCCTGTGGAATCACAGGGG>T	CREBBP	LoF	p.P692_A698delPPVIPQA	PPVIPQA/-	692	-	ENST00000262367	2443.0	31
39	Very high	BRCA	c.4770_4772delCAA	InFrameDeletion	2824	predicted	TIER 2	29	chr16:g.3781900_3781902delGTT	chr16:g.3781894CTTG>C	CREBBP	LoF	p.N1590delN	N/-	1590	-	ENST00000262367	2443.0	31
39	Very high	BRCA	c.5900delA	Frameshift	2485	predicted	TIER 1	31	chr16:g.3779148delT	chr16:g.3779147CT>C	CREBBP	LoF	p.Q1967Rfs*9	Q/.	1967	-	ENST00000262367	2443.0	31
39	Very high	BRCA	c.6384_6401delACCCCAGCCTGGCATGCA	InFrameDeletion	2324	predicted	TIER 2	31	chr16:g.3778655_3778672delAGGCTGGGGTTGCATGCC	chr16:g.3778646GTGCATGCCAGGCTGGGGT>G	CREBBP	LoF	p.Q2128_M2133delQPQPGM	QPQPGM/-	2128	-	ENST00000262367	2443.0	31
39	Very high	BRCA	c.6624_6635dupACAGCAGCAACA	InFrameInsertion	2206	predicted	TIER 2	31	chr16:g.3778424_3778435dupTTGTTGCTGCTG	chr16:g.3778412C>CTGTTGCTGCTGT	CREBBP	LoF	p.Q2213_Q2216dupQQQQ	-/QQQQ	2213	-	ENST00000262367	2443.0	31
39	Very high	BRCA	c.328C>T	Nonsense	1165	predicted	TIER 2	5	chr7:g.101740670C>T	chr7:g.101740670C>T	CUX1	ambiguous	p.Q110*	Q/*	110	+	ENST00000360264	1517.0	24
39	Very high	BRCA	c.1328_1342dupGGAGCCACAGCACCC	InFrameInsertion	4338	predicted	TIER 2	10	chr2:g.46605111_46605125dupGGAGCCACAGCACCC	chr2:g.46605110A>AGGAGCCACAGCACCC	EPAS1	ambiguous	p.R443_T447dupRSHST	-/RSHST	443	+	ENST00000263734	871.0	16
39	Very high	BRCA	c.1095_1099dupATGTG	Frameshift	523	predicted	TIER 2	5	chr3:g.89391029_89391033dupATGTG	chr3:g.89391028A>AATGTG	EPHA3	ambiguous	p.G367Dfs*6	G/.	367	+	ENST00000336596	984.0	17
39	Very high	BRCA	c.594G>A	Nonsense	2081	predicted	TIER 1	5	chr2:g.212615392C>T	chr2:g.212615392C>T	ERBB4	LoF	p.W198*	W/*	198	-	ENST00000342788	1309.0	28
39	Very high	BRCA	c.1913G>A	Nonsense	1367	predicted	TIER 1	16	chr2:g.212522512C>T	chr2:g.212522512C>T	ERBB4	LoF	p.W638*	W/*	638	-	ENST00000342788	1309.0	28
39	Very high	BRCA	c.2779C>T	Nonsense	871	predicted	TIER 1	23	chr2:g.212288967G>A	chr2:g.212288967G>A	ERBB4	LoF	p.R927*	R/*	927	-	ENST00000342788	1309.0	28
39	Very high	BRCA	c.3187C>T	Nonsense	631	predicted	TIER 1	27	chr2:g.212251872G>A	chr2:g.212251872G>A	ERBB4	LoF	p.Q1063*	Q/*	1063	-	ENST00000342788	1309.0	28
39	Very high	BRCA	c.3665_3670dupTGAAGA	InFrameInsertion	452	predicted	TIER 2	28	chr2:g.212248597_212248602dupTCTTCA	chr2:g.212248596T>TTCTTCA	ERBB4	LoF	p.K1223_N1224insMK	-/MK	1223	-	ENST00000342788	1309.0	28
39	Very high	BRCA	c.5704C>T	Nonsense	538	predicted	TIER 1	4	chr4:g.126329733C>T	chr4:g.126329733C>T	FAT4	LoF	p.R1902*	R/*	1902	+	ENST00000394329	4982.0	17
39	Very high	BRCA	c.411_413delGTC	InFrameDeletion	1740	predicted	TIER 2	3	chr10:g.8100437_8100439delGTC	chr10:g.8100434CTCG>C	GATA3	LoF	p.S140delS	S/-	140	+	ENST00000379328	445.0	6
39	Very high	BRCA	c.747G>A	Nonsense	1796	predicted	TIER 1	6	chr2:g.141986855C>T	chr2:g.141986855C>T	LRP1B	LoF	p.W249*	W/*	249	-	ENST00000389484	4600.0	91
39	Very high	BRCA	c.1548C>A	Nonsense	1441	predicted	TIER 1	10	chr2:g.141812689G>T	chr2:g.141812689G>T	LRP1B	LoF	p.C516*	C/*	516	-	ENST00000389484	4600.0	91
39	Very high	BRCA	c.1918_1919delTT	Frameshift	1277	predicted	TIER 1	12	chr2:g.141777544_141777545delAA	chr2:g.141777541TAA>T	LRP1B	LoF	p.L640Rfs*3	L/.	640	-	ENST00000389484	4600.0	91
39	Very high	BRCA	c.2368C>T	Nonsense	1107	predicted	TIER 1	14	chr2:g.141771137G>A	chr2:g.141771137G>A	LRP1B	LoF	p.R790*	R/*	790	-	ENST00000389484	4600.0	91
39	Very high	BRCA	c.2886_2887insTT	Frameshift	792	predicted	TIER 1	18	chr2:g.141739730_141739731insAA	chr2:g.141739729C>CAA	LRP1B	LoF	p.E963Lfs*9	E/.	963	-	ENST00000389484	4600.0	91
39	Very high	BRCA	c.2041C>T	Nonsense	3842	predicted	TIER 1	18	chr17:g.29553492C>T	chr17:g.29553492C>T	NF1	LoF	p.R681*	R/*	681	+	ENST00000358273	2840.0	58
39	Very high	BRCA	c.1246C>T	Nonsense	3476	predicted	TIER 1	11	chr17:g.29528489C>T	chr17:g.29528489C>T	NF1	LoF	p.R416*	R/*	416	+	ENST00000358273	2840.0	58
39	Very high	BRCA	c.1563_1586delTGAGAAGGAGAAGGAAAAGGAGGC	MultiAAMissense	1892	predicted	TIER 1	14	chr12:g.124887004_124887027delGCCTCCTTTTCCTTCTCCTTCTCA	chr12:g.124887003CGCCTCCTTTTCCTTCTCCTTCTCA>C	NCOR2	Act	p.D521_A529delinsE	insE/-	521	-	ENST00000405201	2515.0	47
39	Very high	BRCA	c.2359_2361dupTTT	InFrameInsertion	1145	predicted	TIER 2	14	chr1:g.120496170_120496172dupAAA	chr1:g.120496169T>TAAA	NOTCH2	ambiguous	p.F787dupF	-/F	787	-	ENST00000256646	2472.0	34
39	Very high	BRCA	c.1390_1399delGATAGATTAT	Frameshift	4905	predicted	TIER 1	11	chr5:g.67589627_67589636delGATAGATTAT	chr5:g.67589623ATATGATAGAT>A	PIK3R1	LoF	p.D464Mfs*13	D/.	464	+	ENST00000521381	725.0	16
39	Very high	BRCA	c.733C>T	Nonsense	419	known	TIER 1	7	chr10:g.89717708C>T	chr10:g.89717708C>T	PTEN	LoF	p.Q245*	Q/*	245	+	ENST00000371953	404.0	9
39	Very high	BRCA	c.633C>A	Nonsense	378	known	TIER 1	6	chr10:g.89712015C>A	chr10:g.89712015C>A	PTEN	LoF	p.C211*	C/*	211	+	ENST00000371953	404.0	9
39	Very high	BRCA	c.388C>T	Nonsense	314	known	TIER 1	5	chr10:g.89692904C>T	chr10:g.89692904C>T	PTEN	LoF	p.R130*	R/*	130	+	ENST00000371953	404.0	9
39	Very high	BRCA	c.3401dupT	Frameshift	2065	predicted	TIER 2	22	chr4:g.87679918dupT	chr4:g.87679916C>CT	PTPN13	ambiguous	p.L1134Ffs*16	L/.	1134	+	ENST00000436978	2491.0	48
39	Very high	BRCA	c.2561_2566delGCCAGT	InFrameDeletion	1700	predicted	TIER 2	17	chr4:g.87666192_87666197delGCCAGT	chr4:g.87666190ATGCCAG>A	PTPN13	ambiguous	p.C854_Q855delCQ	CQ/-	854	+	ENST00000436978	2491.0	48
39	Very high	BRCA	c.427C>T	Nonsense	735	predicted	TIER 2	5	chr4:g.87610224C>T	chr4:g.87610224C>T	PTPN13	ambiguous	p.R143*	R/*	143	+	ENST00000436978	2491.0	48
39	Very high	BRCA	c.1829C>G	Nonsense	1126	predicted	TIER 1	23	chr9:g.8501053G>C	chr9:g.8501053G>C	PTPRD	LoF	p.S610*	S/*	610	-	ENST00000381196	1913.0	43
39	Very high	BRCA	c.2023delG	Frameshift	1059	predicted	TIER 1	23	chr9:g.8500860delC	chr9:g.8500858TC>T	PTPRD	LoF	p.E675Nfs*13	E/.	675	-	ENST00000381196	1913.0	43
39	Very high	BRCA	c.2122G>T	Nonsense	1018	predicted	TIER 1	23	chr9:g.8500760C>A	chr9:g.8500760C>A	PTPRD	LoF	p.E708*	E/*	708	-	ENST00000381196	1913.0	43
39	Very high	BRCA	c.2747_2749delAAG	InFrameDeletion	603	predicted	TIER 2	27	chr9:g.8486073_8486075delTCT	chr9:g.8486067ACTT>A	PTPRD	LoF	p.E916delE	E/-	916	-	ENST00000381196	1913.0	43
39	Very high	BRCA	c.1163_1168dupTTTTAA	InFrameInsertion	2810	predicted	TIER 2	12	chr13:g.48947576_48947581dupTTTTAA	chr13:g.48947574G>GATTTTA	RB1	LoF	p.I388_L389dupIL	-/IL	388	+	ENST00000267163	929.0	27
39	Very high	BRCA	c.1089_1091delTGA	InFrameDeletion	2768	predicted	TIER 2	11	chr13:g.48942702_48942704delTGA	chr13:g.48942698TTGA>T	RB1	LoF	p.D363delD	D/-	363	+	ENST00000267163	929.0	27
39	Very high	BRCA	c.1333C>T	Nonsense	4902	known	TIER 1	11	chr18:g.48603032C>T	chr18:g.48603032C>T	SMAD4	LoF	p.R445*	R/*	445	+	ENST00000342988	553.0	12
39	Very high	BRCA	c.35C>A	Nonsense	1329	predicted	TIER 2	2	chr21:g.36421162G>T	chr21:g.36421162G>T	RUNX1	ambiguous	p.S12*	S/*	12	-	ENST00000437180	481.0	9
39	Very high	BRCA	c.1243C>T	Nonsense	655	predicted	TIER 2	9	chr21:g.36164632G>A	chr21:g.36164632G>A	RUNX1	ambiguous	p.Q415*	Q/*	415	-	ENST00000437180	481.0	9
39	Very high	BRCA	c.523delG	Frameshift	4584	predicted	TIER 1	5	chr18:g.48581219delG	chr18:g.48581218TG>T	SMAD4	LoF	p.E175Kfs*27	E/.	175	+	ENST00000342988	553.0	12
39	Very high	BRCA	c.4967_4969delAGA	InFrameDeletion	2148	predicted	TIER 2	11	chr1:g.16257702_16257704delAGA	chr1:g.16257698GAGA>G	SPEN	ambiguous	p.K1656delK	K/-	1656	+	ENST00000375759	3665.0	15
39	Very high	BRCA	c.4554_4556delAGA	InFrameDeletion	2047	predicted	TIER 2	11	chr1:g.16257289_16257291delAGA	chr1:g.16257281AAAG>A	SPEN	ambiguous	p.E1519delE	E/-	1519	+	ENST00000375759	3665.0	15
39	Very high	BRCA	c.3299_3301delAAG	InFrameDeletion	1766	predicted	TIER 2	11	chr1:g.16256034_16256036delAAG	chr1:g.16256030CAAG>C	SPEN	ambiguous	p.E1100delE	E/-	1100	+	ENST00000375759	3665.0	15
39	Very high	BRCA	c.661G>T	Nonsense	284	predicted	TIER 1	6	chr17:g.7578188C>A	chr17:g.7578188C>A	TP53	LoF	p.E221*	E/*	221	-	ENST00000269305	394.0	11
39	Very high	BRCA	c.9594_9595insGAG	InFrameInsertion	4632	predicted	TIER 2	10	chr16:g.72822582_72822583insCCT	chr16:g.72822580G>GCTC	ZFHX3	LoF	p.Q3198_Q3199insE	-/E	3198	-	ENST00000268489	3704.0	10
39	Very high	BRCA	c.9609_9611delGCA	InFrameDeletion	4623	predicted	TIER 2	10	chr16:g.72822584_72822586delCTG	chr16:g.72822563TTGC>T	ZFHX3	LoF	p.Q3204delQ	Q/-	3204	-	ENST00000268489	3704.0	10
39	Very high	BRCA	c.9606_9611dupGCAGCA	InFrameInsertion	4621	predicted	TIER 2	10	chr16:g.72822581_72822586dupCTGCTG	chr16:g.72822563T>TTGCTGC	ZFHX3	LoF	p.Q3203_Q3204dupQQ	-/QQ	3203	-	ENST00000268489	3704.0	10
39	Very high	BRCA	c.9626_9652delAGCCTCCCCCGCCGCCAGCAGCCCAGC	InFrameDeletion	4595	predicted	TIER 2	10	chr16:g.72822527_72822553delGGCTGCTGGCGGCGGGGGAGGCTGCTG	chr16:g.72822522GGCTGGGCTGCTGGCGGCGGGGGAGGCT>G	ZFHX3	LoF	p.Q3209_Q3217delQPPPPPAAQ	QPPPPPAAQ/-	3209	-	ENST00000268489	3704.0	10
39	Very high	BRCA	c.9642_9659delAGCAGCCCAGCCGCCACC	InFrameDeletion	4589	predicted	TIER 2	10	chr16:g.72822518_72822535delTGGCGGCTGGGCTGCTGG	chr16:g.72822515GGGTGGCGGCTGGGCTGCT>G	ZFHX3	LoF	p.A3215_P3220delAAQPPP	AAQPPP/-	3215	-	ENST00000268489	3704.0	10
39	Very high	BRCA	c.9659_9676dupCCACACCACAGCTCCCAC	InFrameInsertion	4582	predicted	TIER 2	10	chr16:g.72822503_72822520dupGAGCTGTGGTGTGGGTGG	chr16:g.72822498A>AGTGGGAGCTGTGGTGTGG	ZFHX3	LoF	p.P3220_P3225dupPTPQLP	-/PTPQLP	3220	-	ENST00000268489	3704.0	10
39	Very high	BRCA	c.10184_10186delAGC	InFrameDeletion	4335	predicted	TIER 2	10	chr16:g.72822000_72822002delTGC	chr16:g.72821988GGCT>G	ZFHX3	LoF	p.Q3395delQ	Q/-	3395	-	ENST00000268489	3704.0	10
39	Very high	BRCA	c.4420C>T	Nonsense	813	predicted	TIER 1	18	chr1:g.27101138C>T	chr1:g.27101138C>T	ARID1A	LoF	p.Q1474*	Q/*	1474	+	ENST00000324856	2286.0	20
39	Very high	BRCA	c.3999_4001delGCA	InFrameDeletion	653	predicted	TIER 2	16	chr1:g.27100203_27100205delGCA	chr1:g.27100181CGCA>C	ARID1A	LoF	p.Q1334delQ	Q/-	1334	+	ENST00000324856	2286.0	20
39	Very high	BRCA	c.3436_3444dupACTCCCCAG	InFrameInsertion	409	predicted	TIER 2	13	chr1:g.27099020_27099028dupACTCCCCAG	chr1:g.27099013G>GCCCCAGACT	ARID1A	LoF	p.T1146_Q1148dupTPQ	-/TPQ	1146	+	ENST00000324856	2286.0	20
39	Very high	BRCA	c.3178_3180delGAG	InFrameDeletion	288	predicted	TIER 2	11	chr1:g.27094470_27094472delGAG	chr1:g.27094467AAGG>A	ARID1A	LoF	p.E1060delE	E/-	1060	+	ENST00000324856	2286.0	20
39	Very high	BRCA	c.3200_3202delGGG	InFrameDeletion	3165	predicted	TIER 2	2	chr4:g.187627781_187627783delCCC	chr4:g.187627779TCCC>T	FAT1	LoF	p.G1067delG	G/-	1067	-	ENST00000441802	4589.0	27
39	Very high	BRCA	c.4888C>T	Nonsense	2369	predicted	TIER 1	10	chr4:g.187542852G>A	chr4:g.187542852G>A	FAT1	LoF	p.Q1630*	Q/*	1630	-	ENST00000441802	4589.0	27
39	Very high	BRCA	c.5993T>G	Nonsense	2053	predicted	TIER 1	10	chr4:g.187541747A>C	chr4:g.187541747A>C	FAT1	LoF	p.L1998*	L/*	1998	-	ENST00000441802	4589.0	27
39	Very high	BRCA	c.1753G>T	Nonsense	4637	predicted	TIER 2	1	chr11:g.92087031G>T	chr11:g.92087031G>T	FAT3	ambiguous	p.G585*	G/*	585	+	ENST00000298047	4590.0	27
39	Very high	BRCA	c.2708_2710delTGG	InFrameDeletion	4602	predicted	TIER 2	1	chr4:g.126240274_126240276delTGG	chr4:g.126240269TGTG>T	FAT4	LoF	p.V903delV	V/-	903	+	ENST00000394329	4982.0	17
39	Very high	BRCA	c.4031_4033delTAA	InFrameDeletion	2755	predicted	TIER 2	26	chr7:g.151900080_151900082delATT	chr7:g.151900077TTTA>T	MLL3	LoF	p.I1344delI	I/-	1344	-	ENST00000262189	4912.0	59
39	Very high	BRCA	c.7630_7641delCAGAGCTTGCCA	InFrameDeletion	1424	predicted	TIER 2	38	chr7:g.151874900_151874911delCAAGCTCTGTGG	chr7:g.151874896CTGGCAAGCTCTG>C	MLL3	LoF	p.Q2544_P2547delQSLP	QSLP/-	2544	-	ENST00000262189	4912.0	59
39	Very high	BRCA	c.8370_8375delATCTGT	InFrameDeletion	1238	predicted	TIER 2	38	chr7:g.151874166_151874171delGATACA	chr7:g.151874162AACAGAT>A	MLL3	LoF	p.S2791_V2792delSV	SV/-	2791	-	ENST00000262189	4912.0	59
39	Very high	BRCA	c.9403G>T	Nonsense	900	predicted	TIER 1	40	chr7:g.151868399C>A	chr7:g.151868399C>A	MLL3	LoF	p.G3135*	G/*	3135	-	ENST00000262189	4912.0	59
39	Very high	BRCA	c.9797_9832delTTTCAGCACAGTTGCAGCCTGCCCAGCAGCAGCAGC	InFrameDeletion	1639	predicted	TIER 2	34	chr12:g.49431316_49431351delGCTGGGCAGGCTGCAACTGTGCTGAAAGCTGCTGCT	chr12:g.49431306TGCTGCTGCTGCTGGGCAGGCTGCAACTGTGCTGAAA>T	MLL2	LoF	p.L3266_Q3277delLSAQLQPAQQQQ	LSAQLQPAQQQQ/-	3266	-	ENST00000301067	5538.0	54
39	Very high	BRCA	c.9834_9845delACAGCAGCAGCA	InFrameDeletion	1635	predicted	TIER 2	34	chr12:g.49431305_49431316delTTGCTGCTGCTG	chr12:g.49431293CTGCTGCTGCTGT>C	MLL2	LoF	p.Q3279_Q3282delQQQQ	QQQQ/-	3279	-	ENST00000301067	5538.0	54
39	Very high	BRCA	c.9961C>T	Nonsense	1614	predicted	TIER 1	34	chr12:g.49431178G>A	chr12:g.49431178G>A	MLL2	LoF	p.R3321*	R/*	3321	-	ENST00000301067	5538.0	54
39	Very high	BRCA	c.10806_10808delACA	InFrameDeletion	1294	predicted	TIER 2	39	chr12:g.49427685_49427687delTTG	chr12:g.49427679CTGT>C	MLL2	LoF	p.Q3612delQ	Q/-	3612	-	ENST00000301067	5538.0	54
39	Very high	BRCA	c.10812_10823delGCAGCAGCAGCA	InFrameDeletion	1289	predicted	TIER 2	39	chr12:g.49427670_49427681delCTGCTGCTGCTG	chr12:g.49427664TTGCTGCTGCTGC>T	MLL2	LoF	p.Q3609_Q3612delQQQQ	QQQQ/-	3609	-	ENST00000301067	5538.0	54
39	Very high	BRCA	c.10821_10823dupGCA	InFrameInsertion	1288	predicted	TIER 2	39	chr12:g.49427679_49427681dupCTG	chr12:g.49427664T>TTGC	MLL2	LoF	p.Q3612dupQ	-/Q	3612	-	ENST00000301067	5538.0	54
39	Very high	BRCA	c.10827_10829delACA	InFrameDeletion	1286	predicted	TIER 2	39	chr12:g.49427664_49427666delTTG	chr12:g.49427658CTGT>C	MLL2	LoF	p.Q3612delQ	Q/-	3612	-	ENST00000301067	5538.0	54
39	Very high	BRCA	c.10812_10832delGCAGCAGCAGCAACAACAGCA	InFrameDeletion	1285	predicted	TIER 2	39	chr12:g.49427675_49427695delGCTGCTGTTGTTGCTGCTGCT	chr12:g.49427655TTGCTGTTGTTGCTGCTGCTGC>T	MLL2	LoF	p.Q3606_Q3612delQQQQQQQ	QQQQQQQ/-	3606	-	ENST00000301067	5538.0	54
39	Very high	BRCA	c.10833_10838dupACAGCA	InFrameInsertion	1277	predicted	TIER 2	39	chr12:g.49427658_49427663dupCTGTTG	chr12:g.49427649G>GTGCTGT	MLL2	LoF	p.Q3611_Q3612dupQQ	-/QQ	3611	-	ENST00000301067	5538.0	54
39	Very high	BRCA	c.11228_11229insACA	InFrameInsertion	1156	predicted	TIER 2	39	chr12:g.49427261_49427262insTTG	chr12:g.49427259C>CTGT	MLL2	LoF	p.Q3745dupQ	-/Q	3745	-	ENST00000301067	5538.0	54
39	Very high	BRCA	c.11217_11237delGCAGCAACAGCAGCAGCAGCA	InFrameDeletion	1151	predicted	TIER 2	39	chr12:g.49427265_49427285delTTGCTGCTGCTGCTGCTGCTG	chr12:g.49427250GTGCTGCTGCTGCTGTTGCTGC>G	MLL2	LoF	p.Q3739_Q3745delQQQQQQQ	QQQQQQQ/-	3739	-	ENST00000301067	5538.0	54
39	Very high	BRCA	c.11223_11237delACAGCAGCAGCAGCA	InFrameDeletion	1150	predicted	TIER 2	39	chr12:g.49427265_49427279delTTGCTGCTGCTGCTG	chr12:g.49427250GTGCTGCTGCTGCTGT>G	MLL2	LoF	p.Q3741_Q3745delQQQQQ	QQQQQ/-	3741	-	ENST00000301067	5538.0	54
39	Very high	BRCA	c.11235_11237delGCA	InFrameDeletion	1149	predicted	TIER 2	39	chr12:g.49427262_49427264delCTG	chr12:g.49427250GTGC>G	MLL2	LoF	p.Q3745delQ	Q/-	3745	-	ENST00000301067	5538.0	54
39	Very high	BRCA	c.11235_11237dupGCA	InFrameInsertion	1146	predicted	TIER 2	39	chr12:g.49427262_49427264dupCTG	chr12:g.49427250G>GTGC	MLL2	LoF	p.Q3745dupQ	-/Q	3745	-	ENST00000301067	5538.0	54
39	Very high	BRCA	c.11241_11243delTCT	InFrameDeletion	1145	predicted	TIER 2	39	chr12:g.49427247_49427249delAAG	chr12:g.49427244TAGA>T	MLL2	LoF	p.L3748delL	L/-	3748	-	ENST00000301067	5538.0	54
39	Very high	BRCA	c.11708_11716delAGCAGCAGC	InFrameDeletion	1050	predicted	TIER 2	39	chr12:g.49426779_49426787delCTGCTGCTG	chr12:g.49426771AGCTGCTGCT>A	MLL2	LoF	p.Q3903_Q3905delQQQ	QQQ/-	3903	-	ENST00000301067	5538.0	54
39	Very high	BRCA	c.11718_11759delGCAACAGCAACAGCAACTTCAGCAGCAGCAGCAGCAGCAGCT	InFrameDeletion	1029	predicted	TIER 2	39	chr12:g.49426746_49426787delCTGCTGAAGTTGCTGTTGCTGTTGCAGCTGCTGCTGCTGCTG	chr12:g.49426728TAGCTGCTGCTGCTGCTGCTGCTGAAGTTGCTGTTGCTGTTGC>T	MLL2	LoF	p.Q3917_Q3930delQQQLQQQQQLQQQQ	QQQLQQQQQLQQQQ/-	3917	-	ENST00000301067	5538.0	54
39	Very high	BRCA	c.11735_11770delTTCAGCAGCAGCAGCAGCAGCAGCTACAACAGCAAC	InFrameDeletion	1027	predicted	TIER 2	39	chr12:g.49426728_49426763delTAGCTGCTGCTGCTGCTGCTGCTGAAGTTGCTGTTG	chr12:g.49426717TGTTGCTGTTGTAGCTGCTGCTGCTGCTGCTGCTGAA>T	MLL2	LoF	p.L3912_Q3923delLQQQQQQQLQQQ	LQQQQQQQLQQQ/-	3912	-	ENST00000301067	5538.0	54
39	Very high	BRCA	c.11745_11786delGCAGCAGCAGCAGCTACAACAGCAACAGCAACTTCAGCAGCA	InFrameDeletion	1025	predicted	TIER 2	39	chr12:g.49426728_49426769delTAGCTGCTGCTGCTGCTGCTGCTGAAGTTGCTGTTGCTGTTG	chr12:g.49426701TTGCTGCTGAAGTTGCTGTTGCTGTTGTAGCTGCTGCTGCTGC>T	MLL2	LoF	p.Q3917_Q3930delQQQLQQQQQLQQQQ	QQQLQQQQQLQQQQ/-	3917	-	ENST00000301067	5538.0	54
39	Very high	BRCA	c.11793_11801delTCAACAGCA	InFrameDeletion	1018	predicted	TIER 2	39	chr12:g.49426687_49426695delTGCTGTTGA	chr12:g.49426686CTGCTGTTGA>C	MLL2	LoF	p.Q3937_Q3939delQQQ	QQQ/-	3937	-	ENST00000301067	5538.0	54
39	Very high	BRCA	c.11792_11809delTTCAACAGCAGCAACAGC	InFrameDeletion	1014	predicted	TIER 2	39	chr12:g.49426692_49426709delTTGAAGCTGTTGCTGCTG	chr12:g.49426678TGCTGTTGCTGCTGTTGAA>T	MLL2	LoF	p.L3931_Q3936delLQQQQQ	LQQQQQ/-	3931	-	ENST00000301067	5538.0	54
39	Very high	BRCA	c.11805_11810delACAGCA	InFrameDeletion	1013	predicted	TIER 2	39	chr12:g.49426683_49426688delTTGCTG	chr12:g.49426677CTGCTGT>C	MLL2	LoF	p.Q3938_Q3939delQQ	QQ/-	3938	-	ENST00000301067	5538.0	54
39	Very high	BRCA	c.11805_11813delACAGCAGCA	InFrameDeletion	1010	predicted	TIER 2	39	chr12:g.49426686_49426694delCTGCTGTTG	chr12:g.49426674CTGCTGCTGT>C	MLL2	LoF	p.Q3937_Q3939delQQQ	QQQ/-	3937	-	ENST00000301067	5538.0	54
39	Very high	BRCA	c.11816_11818delAGC	InFrameDeletion	1007	predicted	TIER 2	39	chr12:g.49426680_49426682delCTG	chr12:g.49426669AGCT>A	MLL2	LoF	p.Q3939delQ	Q/-	3939	-	ENST00000301067	5538.0	54
39	Very high	BRCA	c.11819_11836dupTTCAACAACAGCAGCAGC	InFrameInsertion	1002	predicted	TIER 2	39	chr12:g.49426662_49426679dupTTGTTGAAGCTGCTGCTG	chr12:g.49426651T>TGCTGCTGCTGTTGTTGAA	MLL2	LoF	p.L3940_Q3945dupLQQQQQ	-/LQQQQQ	3940	-	ENST00000301067	5538.0	54
39	Very high	BRCA	c.11898_11909delTCAACAGCAGCA	MultiAAMissense	969	predicted	TIER 1	39	chr12:g.49426579_49426590delTGCTGCTGTTGA	chr12:g.49426578CTGCTGCTGTTGA>C	MLL2	LoF	p.F3966_Q3970delinsL	insL/-	3966	-	ENST00000301067	5538.0	54
39	Very high	BRCA	c.11911_11922delCAACAGCAGCAG	InFrameDeletion	963	predicted	TIER 2	39	chr12:g.49426578_49426589delCTGCTGCTGTTG	chr12:g.49426565TCTGCTGCTGTTG>T	MLL2	LoF	p.Q3971_Q3974delQQQQ	QQQQ/-	3971	-	ENST00000301067	5538.0	54
39	Very high	BRCA	c.11960_11962delCTC	InFrameDeletion	952	predicted	TIER 2	39	chr12:g.49426529_49426531delGAG	chr12:g.49426525TGAG>T	MLL2	LoF	p.P3987delP	P/-	3987	-	ENST00000301067	5538.0	54
39	Very high	BRCA	c.12130_12134delCATCA	Frameshift	901	predicted	TIER 1	39	chr12:g.49426356_49426360delATGTG	chr12:g.49426353CTGATG>C	MLL2	LoF	p.H4044Gfs*11	H/.	4044	-	ENST00000301067	5538.0	54
39	Very high	BRCA	c.1790_1810delGTGCTGCAGCCGCAGCGGCTA	InFrameDeletion	2774	predicted	TIER 2	16	chr17:g.16024409_16024429delAGCCGCTGCGGCTGCAGCACT	chr17:g.16024407GTAGCCGCTGCGGCTGCAGCAC>G	NCOR1	LoF	p.S597_A603delSAAAAAA	SAAAAAA/-	597	-	ENST00000268712	2441.0	46
39	Very high	BRCA	c.2535delC	Frameshift	2508	predicted	TIER 1	20	chr17:g.16004719delG	chr17:g.16004718AG>A	NCOR1	LoF	p.L846Wfs*17	L/.	846	-	ENST00000268712	2441.0	46
39	Very high	BRCA	c.538_539delTT	Frameshift	2939	predicted	TIER 2	5	chr8:g.68939553_68939554delTT	chr8:g.68939550ATT>A	PREX2	ambiguous	p.L180Efs*13	L/.	180	+	ENST00000288368	1607.0	40
39	Very high	BRCA	c.263T>A	Nonsense	2806	predicted	TIER 2	3	chr8:g.68931833T>A	chr8:g.68931833T>A	PREX2	ambiguous	p.L88*	L/*	88	+	ENST00000288368	1607.0	40
39	Very high	BRCA	c.2342G>A	Nonsense	2018	predicted	TIER 2	19	chr19:g.50917090G>A	chr19:g.50917090G>A	POLD1	ambiguous	p.W781*	W/*	781	+	ENST00000440232	1108.0	27
39	Very high	BRCA	c.1850_1851delGT	Frameshift	1706	predicted	TIER 2	15	chr19:g.50912116_50912117delGT	chr19:g.50912112CTG>C	POLD1	ambiguous	p.C617Lfs*17	C/.	617	+	ENST00000440232	1108.0	27
39	Very high	BRCA	c.5255_5260delTTCAAG	InFrameDeletion	942	predicted	TIER 2	9	chr16:g.72831326_72831331delACTTGA	chr16:g.72831320GCTTGAA>G	ZFHX3	LoF	p.V1752_Q1753delVQ	VQ/-	1752	-	ENST00000268489	3704.0	10
39	Very high	BRCA	c.7550_7552delCTC	InFrameDeletion	263	predicted	TIER 2	9	chr16:g.72829032_72829034delGAG	chr16:g.72829028TGAG>T	ZFHX3	LoF	p.P2517delP	P/-	2517	-	ENST00000268489	3704.0	10
39	Very high	BRCA	c.7574_7576delCTC	InFrameDeletion	253	predicted	TIER 2	9	chr16:g.72829009_72829011delAGG	chr16:g.72829004TGAG>T	ZFHX3	LoF	p.P2525delP	P/-	2525	-	ENST00000268489	3704.0	10
38	Very high	BRCA	c.4112_4114delAGA	InFrameDeletion	829	predicted	TIER 2	13	chr20:g.31024627_31024629delAGA	chr20:g.31024623GAGA>G	ASXL1	LoF	p.K1371delK	K/-	1371	+	ENST00000375687	1542.0	13
38	Very high	BRCA	c.2278C>T	Nonsense	270	predicted	TIER 1	13	chr20:g.31022793C>T	chr20:g.31022793C>T	ASXL1	LoF	p.Q760*	Q/*	760	+	ENST00000375687	1542.0	13
38	Very high	BRCA	c.2113delG	Frameshift	212	predicted	TIER 1	13	chr20:g.31022628delG	chr20:g.31022624TG>T	ASXL1	LoF	p.E705Sfs*20	E/.	705	+	ENST00000375687	1542.0	13
38	Very high	BRCA	c.7792C>T	Nonsense	4663	predicted	TIER 1	53	chr11:g.108203492C>T	chr11:g.108203492C>T	ATM	LoF	p.R2598*	R/*	2598	+	ENST00000278616	3057.0	63
38	Very high	BRCA	c.4625dupT	Frameshift	3235	predicted	TIER 1	31	chr11:g.108164053dupT	chr11:g.108164051G>GT	ATM	LoF	p.L1542Ffs*8	L/.	1542	+	ENST00000278616	3057.0	63
38	Very high	BRCA	c.2906_2909dupTTCT	Frameshift	2423	predicted	TIER 1	19	chr11:g.108141858_108141861dupTTCT	chr11:g.108141857C>CTTCT	ATM	LoF	p.K971Sfs*14	K/.	971	+	ENST00000278616	3057.0	63
38	Very high	BRCA	c.1501C>T	Nonsense	1698	predicted	TIER 1	10	chr11:g.108121693C>T	chr11:g.108121693C>T	ATM	LoF	p.Q501*	Q/*	501	+	ENST00000278616	3057.0	63
38	Very high	BRCA	c.1463G>A	Nonsense	1687	predicted	TIER 1	10	chr11:g.108121655G>A	chr11:g.108121655G>A	ATM	LoF	p.W488*	W/*	488	+	ENST00000278616	3057.0	63
38	Very high	BRCA	c.1201C>T	Nonsense	1592	predicted	TIER 1	9	chr11:g.108119795C>T	chr11:g.108119795C>T	ATM	LoF	p.Q401*	Q/*	401	+	ENST00000278616	3057.0	63
38	Very high	BRCA	c.999_1001delTTC	InFrameDeletion	1488	predicted	TIER 2	8	chr11:g.108117788_108117790delTTC	chr11:g.108117784ATTC>A	ATM	LoF	p.S334delS	S/-	334	+	ENST00000278616	3057.0	63
38	Very high	BRCA	c.980delG	Frameshift	1484	predicted	TIER 1	8	chr11:g.108117769delG	chr11:g.108117767AG>A	ATM	LoF	p.G327Efs*19	G/.	327	+	ENST00000278616	3057.0	63
38	Very high	BRCA	c.2603C>G	Nonsense	3824	known	TIER 1	10	chr17:g.41244945G>C	chr17:g.41244945G>C	BRCA1	LoF	p.S868*	S/*	868	-	ENST00000357654	1864.0	23
38	Very high	BRCA	c.4222C>T	Nonsense	3319	known	TIER 1	12	chr17:g.41234556G>A	chr17:g.41234556G>A	BRCA1	LoF	p.Q1408*	Q/*	1408	-	ENST00000357654	1864.0	23
38	Very high	BRCA	c.1218_1220delGGA	InFrameDeletion	837	predicted	TIER 2	12	chr3:g.52438504_52438506delCTC	chr3:g.52438498ATCC>A	BAP1	LoF	p.E406delE	E/-	406	-	ENST00000460680	730.0	17
38	Very high	BRCA	c.1358_1359delAA	Frameshift	754	predicted	TIER 1	13	chr3:g.52437803_52437804delTT	chr3:g.52437801CTT>C	BAP1	LoF	p.K453Rfs*15	K/.	453	-	ENST00000460680	730.0	17
38	Very high	BRCA	c.1490_1491delCT	Frameshift	720	predicted	TIER 1	13	chr3:g.52437672_52437673delAG	chr3:g.52437669CAG>C	BAP1	LoF	p.S497*fs*1	S/.	497	-	ENST00000460680	730.0	17
38	Very high	BRCA	c.1801_1803delAAG	InFrameDeletion	595	predicted	TIER 2	14	chr3:g.52437243_52437245delTCT	chr3:g.52437240CCTT>C	BAP1	LoF	p.K601delK	K/-	601	-	ENST00000460680	730.0	17
38	Very high	BRCA	c.2185C>T	CdsStopSNV	374	predicted	TIER 1	17	chr3:g.52436309G>A	chr3:g.52436309G>A	BAP1	LoF	.	./.	.	-	ENST00000460680	730.0	17
38	Very high	BRCA	c.4573C>T	Nonsense	3140	predicted	TIER 1	14	chr17:g.41226450G>A	chr17:g.41226450G>A	BRCA1	LoF	p.Q1525*	Q/*	1525	-	ENST00000357654	1864.0	23
38	Very high	BRCA	c.36dupT	Nonsense	4872	predicted	TIER 1	2	chr13:g.32890633dupT	chr13:g.32890627A>AT	BRCA2	LoF	p.E13*fs*1	E/.	13	+	ENST00000380152	3419.0	27
38	Very high	BRCA	c.7024C>T	Nonsense	2257	known	TIER 1	14	chr13:g.32929014C>T	chr13:g.32929014C>T	BRCA2	LoF	p.Q2342*	Q/*	2342	+	ENST00000380152	3419.0	27
38	Very high	BRCA	c.5810_5814delCTGGA	Frameshift	1785	predicted	TIER 1	11	chr13:g.32914302_32914306delCTGGA	chr13:g.32914301TCTGGA>T	BRCA2	LoF	p.S1937Ffs*6	S/.	1937	+	ENST00000380152	3419.0	27
38	Very high	BRCA	c.5272_5286delAATGATTCAGGATAT	InFrameDeletion	1609	predicted	TIER 2	11	chr13:g.32913764_32913778delAATGATTCAGGATAT	chr13:g.32913759TATATAATGATTCAGG>T	BRCA2	LoF	p.N1758_Y1762delNDSGY	NDSGY/-	1758	+	ENST00000380152	3419.0	27
38	Very high	BRCA	c.4552G>T	Nonsense	1384	predicted	TIER 1	11	chr13:g.32913044G>T	chr13:g.32913044G>T	BRCA2	LoF	p.E1518*	E/*	1518	+	ENST00000380152	3419.0	27
38	Very high	BRCA	c.4552delG	Frameshift	1383	predicted	TIER 1	11	chr13:g.32913044delG	chr13:g.32913043AG>A	BRCA2	LoF	p.E1518Nfs*25	E/.	1518	+	ENST00000380152	3419.0	27
38	Very high	BRCA	c.4160_4161insGGAAG	Frameshift	1261	predicted	TIER 1	11	chr13:g.32912652_32912653insGGAAG	chr13:g.32912652T>TGGAAG	BRCA2	LoF	p.T1388Efs*24	T/.	1388	+	ENST00000380152	3419.0	27
38	Very high	BRCA	c.3170_3174delAGAAA	Frameshift	991	predicted	TIER 1	11	chr13:g.32911662_32911666delAGAAA	chr13:g.32911658CAAAAG>C	BRCA2	LoF	p.K1057Tfs*8	K/.	1057	+	ENST00000380152	3419.0	27
38	Very high	BRCA	c.1003C>T	Nonsense	3503	known	TIER 1	7	chr16:g.68845757C>T	chr16:g.68845757C>T	CDH1	LoF	p.R335*	R/*	335	+	ENST00000261769	883.0	16
38	Very high	BRCA	c.5796_5804delGGTGTCCAC	InFrameDeletion	2524	predicted	TIER 2	31	chr16:g.3779248_3779256delACACCGTGG	chr16:g.3779243TGTGGACACC>T	CREBBP	LoF	p.V1933_T1935delVST	VST/-	1933	-	ENST00000262367	2443.0	31
38	Very high	BRCA	c.763C>T	Nonsense	4694	predicted	TIER 2	7	chr7:g.55221719C>T	chr7:g.55221719C>T	EGFR	Act	p.R255*	R/*	255	+	ENST00000275493	1211.0	28
38	Very high	BRCA	c.4136_4162delGGCCGGCGGAGCAGACGGAGCCGCCGC	InFrameDeletion	2805	predicted	TIER 2	24	chr7:g.101891907_101891933delGGCCGGCGGAGCAGACGGAGCCGCCGC	chr7:g.101891901TGCCGCGGCCGGCGGAGCAGACGGAGCC>T	CUX1	ambiguous	p.R1379_P1387delRPAEQTEPP	RPAEQTEPP/-	1379	+	ENST00000360264	1517.0	24
38	Very high	BRCA	c.2398delC	Frameshift	2160	predicted	TIER 2	18	chr7:g.101844942delC	chr7:g.101844939GC>G	CUX1	ambiguous	p.Q800Rfs*19	Q/.	800	+	ENST00000360264	1517.0	24
38	Very high	BRCA	c.1820G>A	Nonsense	1914	predicted	TIER 2	15	chr7:g.101840478G>A	chr7:g.101840478G>A	CUX1	ambiguous	p.W607*	W/*	607	+	ENST00000360264	1517.0	24
38	Very high	BRCA	c.1606_1608delCAA	InFrameDeletion	1864	predicted	TIER 2	15	chr7:g.101840264_101840266delCAA	chr7:g.101840259TACA>T	CUX1	ambiguous	p.Q536delQ	Q/-	536	+	ENST00000360264	1517.0	24
38	Very high	BRCA	c.397_399delGAA	InFrameDeletion	288	predicted	TIER 2	3	chr16:g.67645132_67645134delGAA	chr16:g.67645127TAGA>T	CTCF	LoF	p.E133delE	E/-	133	+	ENST00000264010	728.0	12
38	Very high	BRCA	c.313_318delGAACAG	InFrameDeletion	271	predicted	TIER 2	3	chr16:g.67645048_67645053delGAACAG	chr16:g.67645045GAGGAAC>G	CTCF	LoF	p.E105_Q106delEQ	EQ/-	105	+	ENST00000264010	728.0	12
38	Very high	BRCA	c.1859_1860insGCCACCTGG	MultiAAMissense	4630	predicted	TIER 1	12	chr2:g.46607670_46607671insGCCACCTGG	chr2:g.46607669T>TGGCCACCTG	EPAS1	ambiguous	p.C620delinsWPPG	insWPPG/-	620	+	ENST00000263734	871.0	16
38	Very high	BRCA	c.49_51delGAG	InFrameDeletion	3619	predicted	TIER 2	2	chr2:g.46574034_46574036delGAG	chr2:g.46574031AAGG>A	EPAS1	ambiguous	p.E17delE	E/-	17	+	ENST00000263734	871.0	16
38	Very high	BRCA	c.1946C>A	Nonsense	1006	predicted	TIER 2	11	chr3:g.89468412C>A	chr3:g.89468412C>A	EPHA3	ambiguous	p.S649*	S/*	649	+	ENST00000336596	984.0	17
38	Very high	BRCA	c.1534C>T	Nonsense	731	predicted	TIER 2	7	chr3:g.89448570C>T	chr3:g.89448570C>T	EPHA3	ambiguous	p.R512*	R/*	512	+	ENST00000336596	984.0	17
38	Very high	BRCA	c.168_169delTG	Frameshift	2286	predicted	TIER 1	2	chr2:g.212989544_212989545delCA	chr2:g.212989541TCA>T	ERBB4	LoF	p.C56*fs*1	C/.	56	-	ENST00000342788	1309.0	28
38	Very high	BRCA	c.520_528dupGGCTCGGCC	InFrameInsertion	1788	predicted	TIER 2	3	chr10:g.8100546_8100554dupGGCTCGGCC	chr10:g.8100536A>AGGCTCGGCC	GATA3	LoF	p.G174_A176dupGSA	-/GSA	174	+	ENST00000379328	445.0	6
38	Very high	BRCA	c.1139delT	Frameshift	3141	predicted	TIER 1	5	chr5:g.56161270delT	chr5:g.56161267CT>C	MAP3K1	LoF	p.L380*fs*1	L/.	380	+	ENST00000399503	1513.0	20
38	Very high	BRCA	c.150G>A	Nonsense	2085	predicted	TIER 1	2	chr2:g.142567903C>T	chr2:g.142567903C>T	LRP1B	LoF	p.W50*	W/*	50	-	ENST00000389484	4600.0	91
38	Very high	BRCA	c.794_796delCAA	InFrameDeletion	1780	predicted	TIER 2	6	chr2:g.141986808_141986810delGTT	chr2:g.141986805TTTG>T	LRP1B	LoF	p.T265delT	T/-	265	-	ENST00000389484	4600.0	91
38	Very high	BRCA	c.1240A>T	Nonsense	1561	predicted	TIER 1	9	chr2:g.141816620T>A	chr2:g.141816620T>A	LRP1B	LoF	p.R414*	R/*	414	-	ENST00000389484	4600.0	91
38	Very high	BRCA	c.2802C>A	Nonsense	825	predicted	TIER 1	18	chr2:g.141739814G>T	chr2:g.141739814G>T	LRP1B	LoF	p.C934*	C/*	934	-	ENST00000389484	4600.0	91
38	Very high	BRCA	c.328C>T	Nonsense	2315	predicted	TIER 1	3	chr17:g.11984782C>T	chr17:g.11984782C>T	MAP2K4	LoF	p.R110*	R/*	110	+	ENST00000353533	400.0	11
38	Very high	BRCA	c.2873_2876delCTCA	Frameshift	4127	predicted	TIER 1	22	chr17:g.29556875_29556878delCTCA	chr17:g.29556873TACTC>T	NF1	LoF	p.T958Nfs*3	T/.	958	+	ENST00000358273	2840.0	58
38	Very high	BRCA	c.2023G>T	Nonsense	3832	predicted	TIER 1	18	chr17:g.29553474G>T	chr17:g.29553474G>T	NF1	LoF	p.G675*	G/*	675	+	ENST00000358273	2840.0	58
38	Very high	BRCA	c.5771T>G	Nonsense	102	predicted	TIER 1	39	chr17:g.29657475T>G	chr17:g.29657475T>G	NF1	LoF	p.L1924*	L/*	1924	+	ENST00000358273	2840.0	58
38	Very high	BRCA	c.85C>T	Nonsense	2059	predicted	TIER 2	2	chr1:g.120572599G>A	chr1:g.120572599G>A	NOTCH2	ambiguous	p.R29*	R/*	29	-	ENST00000256646	2472.0	34
38	Very high	BRCA	c.6467G>A	Nonsense	3279	predicted	TIER 2	42	chr4:g.87720304G>A	chr4:g.87720304G>A	PTPN13	ambiguous	p.W2156*	W/*	2156	+	ENST00000436978	2491.0	48
38	Very high	BRCA	c.3772C>T	Nonsense	2247	predicted	TIER 2	24	chr4:g.87684098C>T	chr4:g.87684098C>T	PTPN13	ambiguous	p.Q1258*	Q/*	1258	+	ENST00000436978	2491.0	48
38	Very high	BRCA	c.3658_3659dupTG	Frameshift	2204	predicted	TIER 2	24	chr4:g.87683984_87683985dupTG	chr4:g.87683983C>CTG	PTPN13	ambiguous	p.W1220Cfs*7	W/.	1220	+	ENST00000436978	2491.0	48
38	Very high	BRCA	c.2050C>T	Nonsense	1499	predicted	TIER 2	14	chr4:g.87655927C>T	chr4:g.87655927C>T	PTPN13	ambiguous	p.R684*	R/*	684	+	ENST00000436978	2491.0	48
38	Very high	BRCA	c.1441_1449delAAACGGCAA	InFrameDeletion	1240	predicted	TIER 2	10	chr4:g.87643420_87643428delAAACGGCAA	chr4:g.87643418TAAAACGGCA>T	PTPN13	ambiguous	p.K481_Q483delKRQ	KRQ/-	481	+	ENST00000436978	2491.0	48
38	Very high	BRCA	c.1149_1152delGAGA	Frameshift	1073	predicted	TIER 2	7	chr4:g.87622908_87622911delGAGA	chr4:g.87622903CGAGA>C	PTPN13	ambiguous	p.E383Dfs*8	E/.	383	+	ENST00000436978	2491.0	48
38	Very high	BRCA	c.1151_1152delGA	Frameshift	1072	predicted	TIER 2	7	chr4:g.87622910_87622911delGA	chr4:g.87622903CGA>C	PTPN13	ambiguous	p.R384Tfs*26	R/.	384	+	ENST00000436978	2491.0	48
38	Very high	BRCA	c.229C>T	Nonsense	658	predicted	TIER 2	3	chr4:g.87593631C>T	chr4:g.87593631C>T	PTPN13	ambiguous	p.R77*	R/*	77	+	ENST00000436978	2491.0	48
38	Very high	BRCA	c.289C>T	Nonsense	304	predicted	TIER 1	5	chr10:g.89692805C>T	chr10:g.89692805C>T	PTEN	LoF	p.Q97*	Q/*	97	+	ENST00000371953	404.0	9
38	Very high	BRCA	c.2042_2046delCTGAA	Frameshift	1051	predicted	TIER 1	23	chr9:g.8500837_8500841delTCAGT	chr9:g.8500835ATTCAG>A	PTPRD	LoF	p.T681Ifs*16	T/.	681	-	ENST00000381196	1913.0	43
38	Very high	BRCA	c.507_530dupGCCATCGTTGTCCACTGAAGGACA	InFrameInsertion	4578	predicted	TIER 2	5	chr18:g.48581203_48581226dupGCCATCGTTGTCCACTGAAGGACA	chr18:g.48581197G>GGGACAGCCATCGTTGTCCACTGAA	SMAD4	LoF	p.Q169_G176dupQPSLSTEG	-/QPSLSTEG	169	+	ENST00000342988	553.0	12
38	Very high	BRCA	c.961C>T	Nonsense	3958	predicted	TIER 1	8	chr18:g.45374882G>A	chr18:g.45374882G>A	SMAD2	LoF	p.R321*	R/*	321	-	ENST00000402690	468.0	11
38	Very high	BRCA	c.8312_8314delCAA	InFrameDeletion	3090	predicted	TIER 2	11	chr1:g.16261047_16261049delCAA	chr1:g.16261043TCAA>T	SPEN	ambiguous	p.T2771delT	T/-	2771	+	ENST00000375759	3665.0	15
38	Very high	BRCA	c.7474_7476delCAG	InFrameDeletion	2858	predicted	TIER 2	11	chr1:g.16260209_16260211delCAG	chr1:g.16260208CCAG>C	SPEN	ambiguous	p.Q2492delQ	Q/-	2492	+	ENST00000375759	3665.0	15
38	Very high	BRCA	c.1857_1858insTTC	InFrameInsertion	1392	predicted	TIER 2	11	chr1:g.16254592_16254593insTTC	chr1:g.16254592A>ATTC	SPEN	ambiguous	p.E619_R620insF	-/F	619	+	ENST00000375759	3665.0	15
38	Very high	BRCA	c.1604_1606delGAC	InFrameDeletion	1264	predicted	TIER 2	8	chr1:g.16245981_16245983delGAC	chr1:g.16245978CACG>C	SPEN	ambiguous	p.R535delR	R/-	535	+	ENST00000375759	3665.0	15
38	Very high	BRCA	c.262C>T	Nonsense	76	predicted	TIER 2	2	chr12:g.50480028C>T	chr12:g.50480028C>T	SMARCD1	ambiguous	p.R88*	R/*	88	+	ENST00000394963	516.0	13
38	Very high	BRCA	c.1128_1133delCGCCGA	InFrameDeletion	4375	predicted	TIER 2	7	chr12:g.115112610_115112615delGCGTCG	chr12:g.115112606CTCGGCG>C	TBX3	LoF	p.D376_A377delDA	DA/-	376	-	ENST00000257566	744.0	8
38	Very high	BRCA	c.339_341delCTT	InFrameDeletion	420	predicted	TIER 2	4	chr17:g.7579349_7579351delAAG	chr17:g.7579345CAAG>C	TP53	LoF	p.F113delF	F/-	113	-	ENST00000269305	394.0	11
38	Very high	BRCA	c.9690_9692dupGCA	InFrameInsertion	4578	predicted	TIER 2	10	chr16:g.72822491_72822493dupCTG	chr16:g.72822482T>TTGC	ZFHX3	LoF	p.Q3231dupQ	-/Q	3231	-	ENST00000268489	3704.0	10
38	Very high	BRCA	c.10137_10148dupGCAGCGGCAACT	InFrameInsertion	4376	predicted	TIER 2	10	chr16:g.72822027_72822038dupAGTTGCCGCTGC	chr16:g.72822026T>TAGTTGCCGCTGC	ZFHX3	LoF	p.R3381_Q3384dupRQLQ	-/RQLQ	3381	-	ENST00000268489	3704.0	10
38	Very high	BRCA	c.1104_1106delAGA	InFrameDeletion	4871	predicted	TIER 2	12	chr20:g.31021105_31021107delAGA	chr20:g.31021100AAAG>A	ASXL1	LoF	p.E369delE	E/-	369	+	ENST00000375687	1542.0	13
38	Very high	BRCA	c.4001_4003dupAAC	InFrameInsertion	658	predicted	TIER 2	16	chr1:g.27100205_27100207dupAAC	chr1:g.27100203G>GCAA	ARID1A	LoF	p.Q1334dupQ	-/Q	1334	+	ENST00000324856	2286.0	20
38	Very high	BRCA	c.3993_4001dupGCAGCAGCA	InFrameInsertion	651	predicted	TIER 2	16	chr1:g.27100197_27100205dupGCAGCAGCA	chr1:g.27100181C>CGCAGCAGCA	ARID1A	LoF	p.Q1332_Q1334dupQQQ	-/QQQ	1332	+	ENST00000324856	2286.0	20
38	Very high	BRCA	c.3996_4001dupGCAGCA	InFrameInsertion	650	predicted	TIER 2	16	chr1:g.27100200_27100205dupGCAGCA	chr1:g.27100181C>CGCAGCA	ARID1A	LoF	p.Q1333_Q1334dupQQ	-/QQ	1333	+	ENST00000324856	2286.0	20
38	Very high	BRCA	c.3999_4001dupGCA	InFrameInsertion	649	predicted	TIER 2	16	chr1:g.27100203_27100205dupGCA	chr1:g.27100181C>CGCA	ARID1A	LoF	p.Q1334dupQ	-/Q	1334	+	ENST00000324856	2286.0	20
38	Very high	BRCA	c.2503_2505delAAG	InFrameDeletion	3399	predicted	TIER 2	2	chr4:g.187628477_187628479delCTT	chr4:g.187628476CCTT>C	FAT1	LoF	p.K835delK	K/-	835	-	ENST00000441802	4589.0	27
38	Very high	BRCA	c.2809C>T	Nonsense	3296	predicted	TIER 1	2	chr4:g.187628173G>A	chr4:g.187628173G>A	FAT1	LoF	p.R937*	R/*	937	-	ENST00000441802	4589.0	27
38	Very high	BRCA	c.3208C>T	Nonsense	3163	predicted	TIER 1	2	chr4:g.187627774G>A	chr4:g.187627774G>A	FAT1	LoF	p.R1070*	R/*	1070	-	ENST00000441802	4589.0	27
38	Very high	BRCA	c.4376C>G	Nonsense	2609	predicted	TIER 1	8	chr4:g.187549865G>C	chr4:g.187549865G>C	FAT1	LoF	p.S1459*	S/*	1459	-	ENST00000441802	4589.0	27
38	Very high	BRCA	c.5330C>G	Nonsense	2243	predicted	TIER 1	10	chr4:g.187542410G>C	chr4:g.187542410G>C	FAT1	LoF	p.S1777*	S/*	1777	-	ENST00000441802	4589.0	27
38	Very high	BRCA	c.5827C>T	Nonsense	2106	predicted	TIER 1	10	chr4:g.187541913G>A	chr4:g.187541913G>A	FAT1	LoF	p.Q1943*	Q/*	1943	-	ENST00000441802	4589.0	27
38	Very high	BRCA	c.680delA	Frameshift	4009	predicted	TIER 1	1	chr4:g.126238246delA	chr4:g.126238245GA>G	FAT4	LoF	p.E227Gfs*10	E/.	227	+	ENST00000394329	4982.0	17
38	Very high	BRCA	c.7395C>G	Nonsense	1453	predicted	TIER 2	9	chr11:g.92533574C>G	chr11:g.92533574C>G	FAT3	ambiguous	p.Y2465*	Y/*	2465	+	ENST00000298047	4590.0	27
38	Very high	BRCA	c.5346_5351dupGCAGCA	InFrameInsertion	2186	predicted	TIER 2	36	chr7:g.151879604_151879609dupGCTGCT	chr7:g.151879593T>TTGCTGC	MLL3	LoF	p.Q1786_Q1787dupQQ	-/QQ	1786	-	ENST00000262189	4912.0	59
38	Very high	BRCA	c.5355_5357dupACA	InFrameInsertion	2181	predicted	TIER 2	36	chr7:g.151879593_151879595dupTTG	chr7:g.151879587C>CTGT	MLL3	LoF	p.Q1787dupQ	-/Q	1787	-	ENST00000262189	4912.0	59
38	Very high	BRCA	c.6430_6438dupTCTTATTCC	InFrameInsertion	1864	predicted	TIER 2	36	chr7:g.151878507_151878515dupGGAATAAGA	chr7:g.151878506G>GGGAATAAGA	MLL3	LoF	p.S2144_S2146dupSYS	-/SYS	2144	-	ENST00000262189	4912.0	59
38	Very high	BRCA	c.7546_7548delAGA	InFrameDeletion	1449	predicted	TIER 2	38	chr7:g.151874994_151874996delCTT	chr7:g.151874989ATCT>A	MLL3	LoF	p.R2516delR	R/-	2516	-	ENST00000262189	4912.0	59
38	Very high	BRCA	c.7645C>T	Nonsense	1422	predicted	TIER 1	38	chr7:g.151874893G>A	chr7:g.151874893G>A	MLL3	LoF	p.Q2549*	Q/*	2549	-	ENST00000262189	4912.0	59
38	Very high	BRCA	c.10982_10984delTGG	InFrameDeletion	421	predicted	TIER 2	43	chr7:g.151859680_151859682delACC	chr7:g.151859677TCCA>T	MLL3	LoF	p.V3661delV	V/-	3661	-	ENST00000262189	4912.0	59
38	Very high	BRCA	c.3895_3896insATCAGGTTGCTGACATTGATA	MultiAAMissense	3924	predicted	TIER 1	11	chr12:g.49443475_49443476insTATCAATGTCAGCAACCTGAT	chr12:g.49443475C>CTATCAATGTCAGCAACCTGAT	MLL2	LoF	p.R1299delinsHQVADIDS	insHQVADIDS/-	1299	-	ENST00000301067	5538.0	54
38	Very high	BRCA	c.8191_8203delCAGCTGAGTCGAG	Frameshift	2076	predicted	TIER 1	32	chr12:g.49433247_49433259delGACTCAGCTGCTC	chr12:g.49433243CCTCGACTCAGCTG>C	MLL2	LoF	p.Q2731Afs*22	Q/.	2731	-	ENST00000301067	5538.0	54
38	Very high	BRCA	c.8378_8389delGAGGCTCCCAAG	InFrameDeletion	1966	predicted	TIER 2	34	chr12:g.49432752_49432763delTGGGAGCCTCCT	chr12:g.49432749GCTTGGGAGCCTC>G	MLL2	LoF	p.G2793_Q2796delGGSQ	GGSQ/-	2793	-	ENST00000301067	5538.0	54
38	Very high	BRCA	c.9825_9833delGCAGCAGCA	InFrameDeletion	1637	predicted	TIER 2	34	chr12:g.49431311_49431319delCTGCTGCTG	chr12:g.49431305TTGCTGCTGC>T	MLL2	LoF	p.Q3280_Q3282delQQQ	QQQ/-	3280	-	ENST00000301067	5538.0	54
38	Very high	BRCA	c.9834_9835insGAGCAG	InFrameInsertion	1636	predicted	TIER 2	34	chr12:g.49431304_49431305insCTGCTC	chr12:g.49431304G>GCTGCTC	MLL2	LoF	p.Q3278_Q3279insEQ	-/EQ	3278	-	ENST00000301067	5538.0	54
38	Very high	BRCA	c.9834_9848dupACAGCAGCAGCAGCA	InFrameInsertion	1633	predicted	TIER 2	34	chr12:g.49431305_49431319dupTTGCTGCTGCTGCTG	chr12:g.49431290A>ATGCTGCTGCTGCTGT	MLL2	LoF	p.Q3278_Q3282dupQQQQQ	-/QQQQQ	3278	-	ENST00000301067	5538.0	54
38	Very high	BRCA	c.9846_9848dupGCA	InFrameInsertion	1632	predicted	TIER 2	34	chr12:g.49431302_49431304dupCTG	chr12:g.49431290A>ATGC	MLL2	LoF	p.Q3282dupQ	-/Q	3282	-	ENST00000301067	5538.0	54
38	Very high	BRCA	c.11697_11732delGCTTCAGCAGCAGCAGCAGCTGCAACAGCAACAGCA	InFrameDeletion	1044	predicted	TIER 2	39	chr12:g.49426762_49426797delTGCTGTTGCAGCTGCTGCTGCTGCTGAAGCTGCTGT	chr12:g.49426755TTGCTGTTGCTGTTGCAGCTGCTGCTGCTGCTGAAGC>T	MLL2	LoF	p.L3906_Q3917delLQQQQQLQQQQQ	LQQQQQLQQQQQ/-	3906	-	ENST00000301067	5538.0	54
38	Very high	BRCA	c.11729_11734delAGCAAC	InFrameDeletion	1042	predicted	TIER 2	39	chr12:g.49426765_49426770delTGTTGC	chr12:g.49426753AGTTGCT>A	MLL2	LoF	p.Q3910_Q3911delQQ	QQ/-	3910	-	ENST00000301067	5538.0	54
38	Very high	BRCA	c.11727_11741delACAGCAACTTCAGCA	InFrameDeletion	1039	predicted	TIER 2	39	chr12:g.49426752_49426766delAAGTTGCTGTTGCTG	chr12:g.49426746CTGCTGAAGTTGCTGT>C	MLL2	LoF	p.L3912_Q3916delLQQQQ	LQQQQ/-	3912	-	ENST00000301067	5538.0	54
38	Very high	BRCA	c.11717_11752delTGCAACAGCAACAGCAACTTCAGCAGCAGCAGCAGC	InFrameDeletion	1036	predicted	TIER 2	39	chr12:g.49426755_49426790delTTGCTGTTGCTGTTGCAGCTGCTGCTGCTGCTGAAG	chr12:g.49426735TGCTGCTGCTGCTGCTGAAGTTGCTGTTGCTGTTGCA>T	MLL2	LoF	p.L3906_Q3917delLQQQQQLQQQQQ	LQQQQQLQQQQQ/-	3906	-	ENST00000301067	5538.0	54
38	Very high	BRCA	c.11750_11758delAGCAGCAGC	InFrameDeletion	1034	predicted	TIER 2	39	chr12:g.49426743_49426751delCTGCTGCTG	chr12:g.49426729AGCTGCTGCT>A	MLL2	LoF	p.Q3917_Q3919delQQQ	QQQ/-	3917	-	ENST00000301067	5538.0	54
38	Very high	BRCA	c.11796_11807dupACAGCAGCAACA	InFrameInsertion	1016	predicted	TIER 2	39	chr12:g.49426683_49426694dupTTGCTGCTGTTG	chr12:g.49426680C>CTGTTGCTGCTGT	MLL2	LoF	p.Q3936_Q3939dupQQQQ	-/QQQQ	3936	-	ENST00000301067	5538.0	54
38	Very high	BRCA	c.11796_11813delACAGCAGCAACAGCAGCA	InFrameDeletion	1011	predicted	TIER 2	39	chr12:g.49426677_49426694delCTGCTGTTGCTGCTGTTG	chr12:g.49426674CTGCTGCTGTTGCTGCTGT>C	MLL2	LoF	p.Q3934_Q3939delQQQQQQ	QQQQQQ/-	3934	-	ENST00000301067	5538.0	54
38	Very high	BRCA	c.11787_11813dupACAGCTTCAACAGCAGCAACAGCAGCA	InFrameInsertion	1009	predicted	TIER 2	39	chr12:g.49426683_49426709dupTTGCTGCTGTTGAAGCTGTTGCTGCTG	chr12:g.49426674C>CTGCTGCTGTTGCTGCTGTTGAAGCTGT	MLL2	LoF	p.Q3939_Q3947dupQLQQQQQQQ	-/QLQQQQQQQ	3939	-	ENST00000301067	5538.0	54
38	Very high	BRCA	c.11799_11825delGCAGCAACAGCAGCAGCAGCTTCAACA	InFrameDeletion	1005	predicted	TIER 2	39	chr12:g.49426674_49426700delCTGCTGCTGTTGCTGCTGTTGAAGCTG	chr12:g.49426662TTGTTGAAGCTGCTGCTGCTGTTGCTGC>T	MLL2	LoF	p.Q3939_Q3947delQLQQQQQQQ	QLQQQQQQQ/-	3939	-	ENST00000301067	5538.0	54
38	Very high	BRCA	c.1166_1167delAG	Frameshift	3033	predicted	TIER 1	11	chr17:g.16046927_16046928delTC	chr17:g.16046925GCT>G	NCOR1	LoF	p.E389Afs*4	E/.	389	-	ENST00000268712	2441.0	46
38	Very high	BRCA	c.1729C>T	Nonsense	3574	predicted	TIER 2	16	chr8:g.68992764C>T	chr8:g.68992764C>T	PREX2	ambiguous	p.R577*	R/*	577	+	ENST00000288368	1607.0	40
38	Very high	BRCA	c.497T>A	Nonsense	2923	predicted	TIER 2	5	chr8:g.68939512T>A	chr8:g.68939512T>A	PREX2	ambiguous	p.L166*	L/*	166	+	ENST00000288368	1607.0	40
38	Very high	BRCA	c.7G>T	Nonsense	2666	predicted	TIER 2	1	chr8:g.68864636G>T	chr8:g.68864636G>T	PREX2	ambiguous	p.E3*	E/*	3	+	ENST00000288368	1607.0	40
38	Very high	BRCA	c.7_15delGAGGACAGC	InFrameDeletion	2664	predicted	TIER 2	1	chr8:g.68864636_68864644delGAGGACAGC	chr8:g.68864632GAGCGAGGAC>G	PREX2	ambiguous	p.E3_S5delEDS	EDS/-	3	+	ENST00000288368	1607.0	40
38	Very high	BRCA	c.1891C>T	Nonsense	127	predicted	TIER 1	15	chr5:g.67592075C>T	chr5:g.67592075C>T	PIK3R1	LoF	p.R631*	R/*	631	+	ENST00000521381	725.0	16
38	Very high	BRCA	c.1624_1634delAGAAGAAGATT	Frameshift	24	predicted	TIER 1	13	chr5:g.67591031_67591041delAGAAGAAGATT	chr5:g.67591029GTAGAAGAAGAT>G	PIK3R1	LoF	p.R542Gfs*10	R/.	542	+	ENST00000521381	725.0	16
38	Very high	BRCA	c.3169C>T	Nonsense	2504	predicted	TIER 2	26	chr19:g.50920477C>T	chr19:g.50920477C>T	POLD1	ambiguous	p.Q1057*	Q/*	1057	+	ENST00000440232	1108.0	27
38	Very high	BRCA	c.1882C>T	Nonsense	1719	predicted	TIER 2	15	chr19:g.50912148C>T	chr19:g.50912148C>T	POLD1	ambiguous	p.Q628*	Q/*	628	+	ENST00000440232	1108.0	27
38	Very high	BRCA	c.1223_1231dupGCTCGGTAC	InFrameInsertion	2630	predicted	TIER 2	2	chr16:g.72992814_72992822dupGTACCGAGC	chr16:g.72992813A>AGTACCGAGC	ZFHX3	LoF	p.V410_L411insRSV	-/RSV	410	-	ENST00000268489	3704.0	10
38	Very high	BRCA	c.1895_1918dupGGGAGTGCCCCTCGGGGAGTGGCG	InFrameInsertion	2345	predicted	TIER 2	2	chr16:g.72992128_72992151dupGCCACTCCCCGAGGGGCACTCCCC	chr16:g.72992126A>ACGCCACTCCCCGAGGGGCACTCCC	ZFHX3	LoF	p.G632_G639dupGECPSGSG	-/GECPSGSG	632	-	ENST00000268489	3704.0	10
38	Very high	BRCA	c.1906_1929delTCGGGGAGTGGCGTGGAGTGCCCC	InFrameDeletion	2340	predicted	TIER 2	2	chr16:g.72992126_72992149delACGCCACTCCCCGAGGGGCACTCC	chr16:g.72992115TGGGGCACTCCACGCCACTCCCCGA>T	ZFHX3	LoF	p.S636_P643delSGSGVECP	SGSGVECP/-	636	-	ENST00000268489	3704.0	10
38	Very high	BRCA	c.5178_5192dupACAGCAGCAGCAACA	InFrameInsertion	979	predicted	TIER 2	9	chr16:g.72831401_72831415dupTGTTGTTGCTGCTGC	chr16:g.72831388C>CTGTTGCTGCTGCTGT	ZFHX3	LoF	p.Q1737_Q1741dupQQQQQ	-/QQQQQ	1737	-	ENST00000268489	3704.0	10
38	Very high	BRCA	c.5247_5252dupGGCTCA	InFrameInsertion	945	predicted	TIER 2	9	chr16:g.72831331_72831336dupAGCCTG	chr16:g.72831328T>TTGAGCC	ZFHX3	LoF	p.A1750_Q1751dupAQ	-/AQ	1750	-	ENST00000268489	3704.0	10
38	Very high	BRCA	c.5563_5565dupCAG	InFrameInsertion	851	predicted	TIER 2	9	chr16:g.72831026_72831028dupTGC	chr16:g.72831015T>TCTG	ZFHX3	LoF	p.Q1855dupQ	-/Q	1855	-	ENST00000268489	3704.0	10
38	Very high	BRCA	c.5631_5633delGAA	InFrameDeletion	819	predicted	TIER 2	9	chr16:g.72830953_72830955delCTT	chr16:g.72830947GTTC>G	ZFHX3	LoF	p.K1877delK	K/-	1877	-	ENST00000268489	3704.0	10
38	Very high	BRCA	c.7507C>T	Nonsense	279	predicted	TIER 1	9	chr16:g.72829074G>A	chr16:g.72829074G>A	ZFHX3	LoF	p.Q2503*	Q/*	2503	-	ENST00000268489	3704.0	10
37	Very high	BRCA	c.1756_1758delCAG	InFrameDeletion	4748	predicted	TIER 2	3	chr1:g.27058048_27058050delCAG	chr1:g.27058044TCAG>T	ARID1A	LoF	p.Q586delQ	Q/-	586	+	ENST00000324856	2286.0	20
37	Very high	BRCA	c.1369C>T	Nonsense	1666	known	TIER 1	10	chr11:g.108121561C>T	chr11:g.108121561C>T	ATM	LoF	p.R457*	R/*	457	+	ENST00000278616	3057.0	63
37	Very high	BRCA	c.742C>T	Nonsense	1399	known	TIER 1	7	chr11:g.108115594C>T	chr11:g.108115594C>T	ATM	LoF	p.R248*	R/*	248	+	ENST00000278616	3057.0	63
37	Very high	BRCA	c.67C>T	Nonsense	1041	known	TIER 1	2	chr11:g.108098418C>T	chr11:g.108098418C>T	ATM	LoF	p.R23*	R/*	23	+	ENST00000278616	3057.0	63
37	Very high	BRCA	c.1773C>G	Nonsense	87	predicted	TIER 1	13	chr20:g.31022288C>G	chr20:g.31022288C>G	ASXL1	LoF	p.Y591*	Y/*	591	+	ENST00000375687	1542.0	13
37	Very high	BRCA	c.1773C>A	Nonsense	88	predicted	TIER 1	13	chr20:g.31022288C>A	chr20:g.31022288C>A	ASXL1	LoF	p.Y591*	Y/*	591	+	ENST00000375687	1542.0	13
37	Very high	BRCA	c.1748G>A	Nonsense	84	predicted	TIER 1	13	chr20:g.31022263G>A	chr20:g.31022263G>A	ASXL1	LoF	p.W583*	W/*	583	+	ENST00000375687	1542.0	13
37	Very high	BRCA	c.1746_1751delCTGGGT	InFrameDeletion	83	predicted	TIER 2	13	chr20:g.31022261_31022266delCTGGGT	chr20:g.31022260CCTGGGT>C	ASXL1	LoF	p.W583_V584delWV	WV/-	583	+	ENST00000375687	1542.0	13
37	Very high	BRCA	c.1628_1634dupAAGATCG	Frameshift	24	predicted	TIER 1	12	chr20:g.31021629_31021635dupAAGATCG	chr20:g.31021627T>TGAAGATC	ASXL1	LoF	p.Q546Rfs*7	Q/.	546	+	ENST00000375687	1542.0	13
37	Very high	BRCA	c.5870_5871delAT	Frameshift	3760	predicted	TIER 1	39	chr11:g.108180994_108180995delAT	chr11:g.108180992CTA>C	ATM	LoF	p.Y1957Cfs*7	Y/.	1957	+	ENST00000278616	3057.0	63
37	Very high	BRCA	c.4612-3_4616delTAGGTATT	SpliceAcceptorDeletion	3231	predicted	TIER 1	303131	chr11:g.108164037_108164044delTAGGTATT	chr11:g.108164032ATATTTAGG>A	ATM	LoF	.	./.	.	+	ENST00000278616	3057.0	63
37	Very high	BRCA	c.4603C>T	Nonsense	3206	predicted	TIER 1	30	chr11:g.108163512C>T	chr11:g.108163512C>T	ATM	LoF	p.Q1535*	Q/*	1535	+	ENST00000278616	3057.0	63
37	Very high	BRCA	c.4600_4605delGTTCAG	InFrameDeletion	3203	predicted	TIER 2	30	chr11:g.108163509_108163514delGTTCAG	chr11:g.108163506GAGGTTC>G	ATM	LoF	p.V1534_Q1535delVQ	VQ/-	1534	+	ENST00000278616	3057.0	63
37	Very high	BRCA	c.4493T>G	Nonsense	3173	predicted	TIER 1	30	chr11:g.108163402T>G	chr11:g.108163402T>G	ATM	LoF	p.L1498*	L/*	1498	+	ENST00000278616	3057.0	63
37	Very high	BRCA	c.4042_4044delTTG	InFrameDeletion	2959	predicted	TIER 2	27	chr11:g.108158375_108158377delTTG	chr11:g.108158374ATTG>A	ATM	LoF	p.L1348delL	L/-	1348	+	ENST00000278616	3057.0	63
37	Very high	BRCA	c.2693T>G	Nonsense	2326	predicted	TIER 1	18	chr11:g.108139191T>G	chr11:g.108139191T>G	ATM	LoF	p.L898*	L/*	898	+	ENST00000278616	3057.0	63
37	Very high	BRCA	c.2358_2359delCT	Frameshift	2104	predicted	TIER 1	15	chr11:g.108128315_108128316delCT	chr11:g.108128314GCT>G	ATM	LoF	p.L787Efs*10	L/.	787	+	ENST00000278616	3057.0	63
37	Very high	BRCA	c.1348delG	Frameshift	1656	predicted	TIER 1	10	chr11:g.108121540delG	chr11:g.108121536TG>T	ATM	LoF	p.E450Nfs*23	E/.	450	+	ENST00000278616	3057.0	63
37	Very high	BRCA	c.1235G>A	Nonsense	1601	predicted	TIER 1	9	chr11:g.108119829G>A	chr11:g.108119829G>A	ATM	LoF	p.W412*	W/*	412	+	ENST00000278616	3057.0	63
37	Very high	BRCA	c.943_944delTT	Frameshift	1475	predicted	TIER 1	8	chr11:g.108117732_108117733delTT	chr11:g.108117731CTT>C	ATM	LoF	p.L315Ifs*2	L/.	315	+	ENST00000278616	3057.0	63
37	Very high	BRCA	c.478_482delTCTCA	Frameshift	1256	predicted	TIER 1	5	chr11:g.108106543_108106547delTCTCA	chr11:g.108106541TATCTC>T	ATM	LoF	p.S160Afs*23	S/.	160	+	ENST00000278616	3057.0	63
37	Very high	BRCA	c.217_218delGA	Frameshift	1131	predicted	TIER 1	4	chr11:g.108099936_108099937delGA	chr11:g.108099934CAG>C	ATM	LoF	p.E73Mfs*26	E/.	73	+	ENST00000278616	3057.0	63
37	Very high	BRCA	c.103C>T	Nonsense	1073	predicted	TIER 1	3	chr11:g.108098533C>T	chr11:g.108098533C>T	ATM	LoF	p.R35*	R/*	35	+	ENST00000278616	3057.0	63
37	Very high	BRCA	c.70A>T	Nonsense	1042	predicted	TIER 1	2	chr11:g.108098421A>T	chr11:g.108098421A>T	ATM	LoF	p.K24*	K/*	24	+	ENST00000278616	3057.0	63
37	Very high	BRCA	c.2338C>T	Nonsense	3900	known	TIER 1	10	chr17:g.41245210G>A	chr17:g.41245210G>A	BRCA1	LoF	p.Q780*	Q/*	780	-	ENST00000357654	1864.0	23
37	Very high	BRCA	c.4015G>T	Nonsense	3445	known	TIER 1	10	chr17:g.41243533C>A	chr17:g.41243533C>A	BRCA1	LoF	p.E1339*	E/*	1339	-	ENST00000357654	1864.0	23
37	Very high	BRCA	c.4689C>G	Nonsense	3088	known	TIER 1	15	chr17:g.41223242G>C	chr17:g.41223242G>C	BRCA1	LoF	p.Y1563*	Y/*	1563	-	ENST00000357654	1864.0	23
37	Very high	BRCA	c.92G>A	Nonsense	4928	known	TIER 1	3	chr13:g.32893238G>A	chr13:g.32893238G>A	BRCA2	LoF	p.W31*	W/*	31	+	ENST00000380152	3419.0	27
37	Very high	BRCA	c.781C>T	Nonsense	1075	predicted	TIER 1	9	chr3:g.52440271G>A	chr3:g.52440271G>A	BAP1	LoF	p.Q261*	Q/*	261	-	ENST00000460680	730.0	17
37	Very high	BRCA	c.830_831delAA	Frameshift	1030	predicted	TIER 1	10	chr3:g.52439881_52439882delTT	chr3:g.52439880CTT>C	BAP1	LoF	p.Q277Rfs*6	Q/.	277	-	ENST00000460680	730.0	17
37	Very high	BRCA	c.3514G>T	Nonsense	3583	predicted	TIER 1	10	chr17:g.41244034C>A	chr17:g.41244034C>A	BRCA1	LoF	p.E1172*	E/*	1172	-	ENST00000357654	1864.0	23
37	Very high	BRCA	c.3999_4008delTGGTCTGAGT	Frameshift	3446	predicted	TIER 1	10	chr17:g.41243544_41243553delAGACCAACTC	chr17:g.41243539CACTCAGACCA>C	BRCA1	LoF	p.G1334Tfs*29	G/.	1334	-	ENST00000357654	1864.0	23
37	Very high	BRCA	c.4035delA	Frameshift	3439	predicted	TIER 1	10	chr17:g.41243514delT	chr17:g.41243512CT>C	BRCA1	LoF	p.E1346Kfs*20	E/.	1346	-	ENST00000357654	1864.0	23
37	Very high	BRCA	c.4325C>A	Nonsense	1313	known	TIER 1	11	chr13:g.32912817C>A	chr13:g.32912817C>A	BRCA2	LoF	p.S1442*	S/*	1442	+	ENST00000380152	3419.0	27
37	Very high	BRCA	c.3109C>T	Nonsense	982	known	TIER 1	11	chr13:g.32911601C>T	chr13:g.32911601C>T	BRCA2	LoF	p.Q1037*	Q/*	1037	+	ENST00000380152	3419.0	27
37	Very high	BRCA	c.9959_9961delCTC	InFrameDeletion	3499	predicted	TIER 2	27	chr13:g.32972609_32972611delCTC	chr13:g.32972605TCTC>T	BRCA2	LoF	p.P3320delP	P/-	3320	+	ENST00000380152	3419.0	27
37	Very high	BRCA	c.9666delT	Frameshift	3423	predicted	TIER 1	27	chr13:g.32972316delT	chr13:g.32972315GT>G	BRCA2	LoF	p.C3222Wfs*27	C/.	3222	+	ENST00000380152	3419.0	27
37	Very high	BRCA	c.6899_6906dupAAGAAAAA	Frameshift	2157	predicted	TIER 1	12	chr13:g.32918752_32918759dupAAGAAAAA	chr13:g.32918751C>CAAGAAAAA	BRCA2	LoF	p.S2303Kfs*5	S/.	2303	+	ENST00000380152	3419.0	27
37	Very high	BRCA	c.6780_6782delGGA	InFrameDeletion	2087	predicted	TIER 2	11	chr13:g.32915272_32915274delGGA	chr13:g.32915269TGAG>T	BRCA2	LoF	p.E2261delE	E/-	2261	+	ENST00000380152	3419.0	27
37	Very high	BRCA	c.6332_6334delAGA	InFrameDeletion	1955	predicted	TIER 2	11	chr13:g.32914824_32914826delAGA	chr13:g.32914822TAAG>T	BRCA2	LoF	p.K2111delK	K/-	2111	+	ENST00000380152	3419.0	27
37	Very high	BRCA	c.5754_5755delTA	Frameshift	1764	predicted	TIER 1	11	chr13:g.32914246_32914247delTA	chr13:g.32914244CAT>C	BRCA2	LoF	p.H1918Qfs*5	H/.	1918	+	ENST00000380152	3419.0	27
37	Very high	BRCA	c.5569_5573delGAAAC	Frameshift	1689	predicted	TIER 1	11	chr13:g.32914061_32914065delGAAAC	chr13:g.32914060TGAAAC>T	BRCA2	LoF	p.E1857Nfs*2	E/.	1857	+	ENST00000380152	3419.0	27
37	Very high	BRCA	c.5299_5307delAAACTTGAT	InFrameDeletion	1619	predicted	TIER 2	11	chr13:g.32913791_32913799delAAACTTGAT	chr13:g.32913788AATAAACTTG>A	BRCA2	LoF	p.K1767_D1769delKLD	KLD/-	1767	+	ENST00000380152	3419.0	27
37	Very high	BRCA	c.4936delG	Frameshift	1511	predicted	TIER 1	11	chr13:g.32913428delG	chr13:g.32913427AG>A	BRCA2	LoF	p.E1646Kfs*24	E/.	1646	+	ENST00000380152	3419.0	27
37	Very high	BRCA	c.4936_4938delGAA	InFrameDeletion	1510	predicted	TIER 2	11	chr13:g.32913428_32913430delGAA	chr13:g.32913425AAAG>A	BRCA2	LoF	p.E1646delE	E/-	1646	+	ENST00000380152	3419.0	27
37	Very high	BRCA	c.4414_4415delAA	Frameshift	1333	predicted	TIER 1	11	chr13:g.32912906_32912907delAA	chr13:g.32912904GAA>G	BRCA2	LoF	p.K1472Efs*9	K/.	1472	+	ENST00000380152	3419.0	27
37	Very high	BRCA	c.4415_4418delAGAA	Frameshift	1331	predicted	TIER 1	11	chr13:g.32912907_32912910delAGAA	chr13:g.32912901TAAGA>T	BRCA2	LoF	p.K1472Tfs*6	K/.	1472	+	ENST00000380152	3419.0	27
37	Very high	BRCA	c.4216_4218delAAA	InFrameDeletion	1275	predicted	TIER 2	11	chr13:g.32912708_32912710delAAA	chr13:g.32912707TAAA>T	BRCA2	LoF	p.K1406delK	K/-	1406	+	ENST00000380152	3419.0	27
37	Very high	BRCA	c.3634_3639delAATGAA	InFrameDeletion	1124	predicted	TIER 2	11	chr13:g.32912126_32912131delAATGAA	chr13:g.32912120GATGAAA>G	BRCA2	LoF	p.N1212_E1213delNE	NE/-	1212	+	ENST00000380152	3419.0	27
37	Very high	BRCA	c.468dupT	Nonsense	93	predicted	TIER 1	5	chr13:g.32900280dupT	chr13:g.32900279A>AT	BRCA2	LoF	p.K157*fs*1	K/.	157	+	ENST00000380152	3419.0	27
37	Very high	BRCA	c.1471C>T	Nonsense	2570	predicted	TIER 1	8	chr2:g.202150030C>T	chr2:g.202150030C>T	CASP8	LoF	p.R491*	R/*	491	+	ENST00000358485	539.0	9
37	Very high	BRCA	c.1372_1390dupTTTCTGCTGGGGATGGCCA	Frameshift	2555	predicted	TIER 1	8	chr2:g.202149931_202149949dupTTTCTGCTGGGGATGGCCA	chr2:g.202149930C>CTTTCTGCTGGGGATGGCCA	CASP8	LoF	p.T464Ifs*10	T/.	464	+	ENST00000358485	539.0	9
37	Very high	BRCA	c.320delA	Frameshift	4522	predicted	TIER 1	1	chr12:g.12871093delA	chr12:g.12871092CA>C	CDKN1B	LoF	p.Q107Rfs*12	Q/.	107	+	ENST00000228872	199.0	3
37	Very high	BRCA	c.2330_2353delGTGCACACACCAACAACATGATGG	InFrameDeletion	4051	predicted	TIER 2	13	chr16:g.3823872_3823895delGTTGGTGTGTGCACCCATCATGTT	chr16:g.3823861GCCATCATGTTGTTGGTGTGTGCAC>G	CREBBP	LoF	p.G777_M784delGAHTNNMM	GAHTNNMM/-	777	-	ENST00000262367	2443.0	31
37	Very high	BRCA	c.2355_2366delCCAGGCGCCCGC	InFrameDeletion	4044	predicted	TIER 2	13	chr16:g.3823851_3823862delGGGCGCCTGGGC	chr16:g.3823848AGCGGGCGCCTGG>A	CREBBP	LoF	p.A787_Q790delAPAQ	APAQ/-	787	-	ENST00000262367	2443.0	31
37	Very high	BRCA	c.2361_2366delGCCCGC	InFrameDeletion	4043	predicted	TIER 2	13	chr16:g.3823851_3823856delGGGCGC	chr16:g.3823848AGCGGGC>A	CREBBP	LoF	p.P788_A789delPA	PA/-	788	-	ENST00000262367	2443.0	31
37	Very high	BRCA	c.5887G>T	Nonsense	2491	predicted	TIER 1	31	chr16:g.3779161C>A	chr16:g.3779161C>A	CREBBP	LoF	p.E1963*	E/*	1963	-	ENST00000262367	2443.0	31
37	Very high	BRCA	c.6624_6625insG	Frameshift	2218	predicted	TIER 1	31	chr16:g.3778423_3778424insC	chr16:g.3778423G>GC	CREBBP	LoF	p.Q2209Afs*132	Q/.	2209	-	ENST00000262367	2443.0	31
37	Very high	BRCA	c.6624_6626delACA	InFrameDeletion	2216	predicted	TIER 2	31	chr16:g.3778427_3778429delTTG	chr16:g.3778421CTGT>C	CREBBP	LoF	p.Q2216delQ	Q/-	2216	-	ENST00000262367	2443.0	31
37	Very high	BRCA	c.6630_6632dupGCA	InFrameInsertion	2210	predicted	TIER 2	31	chr16:g.3778421_3778423dupCTG	chr16:g.3778415T>TTGC	CREBBP	LoF	p.Q2216dupQ	-/Q	2216	-	ENST00000262367	2443.0	31
37	Very high	BRCA	c.6633_6641dupACAGCAGCA	InFrameInsertion	2201	predicted	TIER 2	31	chr16:g.3778418_3778426dupCTGCTGTTG	chr16:g.3778406C>CTGCTGCTGT	CREBBP	LoF	p.Q2214_Q2216dupQQQ	-/QQQ	2214	-	ENST00000262367	2443.0	31
37	Very high	BRCA	c.2425C>T	Nonsense	4972	predicted	TIER 2	15	chr2:g.46609701C>T	chr2:g.46609701C>T	EPAS1	ambiguous	p.Q809*	Q/*	809	+	ENST00000263734	871.0	16
37	Very high	BRCA	c.2424C>A	Nonsense	4970	predicted	TIER 2	15	chr2:g.46609700C>A	chr2:g.46609700C>A	EPAS1	ambiguous	p.Y808*	Y/*	808	+	ENST00000263734	871.0	16
37	Very high	BRCA	c.1943_1957delGGCCCACAAAGTGGG	InFrameDeletion	4656	predicted	TIER 2	12	chr2:g.46607754_46607768delGGCCCACAAAGTGGG	chr2:g.46607752TGGGCCCACAAAGTGG>T	EPAS1	ambiguous	p.G648_W652delGPTKW	GPTKW/-	648	+	ENST00000263734	871.0	16
37	Very high	BRCA	c.1429_1434dupAGCAGC	InFrameInsertion	4369	predicted	TIER 2	10	chr2:g.46605212_46605217dupAGCAGC	chr2:g.46605201C>CCAGCAG	EPAS1	ambiguous	p.S477_S478dupSS	-/SS	477	+	ENST00000263734	871.0	16
37	Very high	BRCA	c.1432_1434dupAGC	InFrameInsertion	4368	predicted	TIER 2	10	chr2:g.46605215_46605217dupAGC	chr2:g.46605201C>CCAG	EPAS1	ambiguous	p.S478dupS	-/S	478	+	ENST00000263734	871.0	16
37	Very high	BRCA	c.406C>T	Nonsense	302	predicted	TIER 2	3	chr3:g.89259262C>T	chr3:g.89259262C>T	EPHA3	ambiguous	p.R136*	R/*	136	+	ENST00000336596	984.0	17
37	Very high	BRCA	c.5053C>T	Nonsense	211	predicted	TIER 1	1	chr4:g.126242619C>T	chr4:g.126242619C>T	FAT4	LoF	p.R1685*	R/*	1685	+	ENST00000394329	4982.0	17
37	Very high	BRCA	c.630_640delCCAGCAGCGCT	Frameshift	894	predicted	TIER 1	2	chr14:g.38061349_38061359delAGCGCTGCTGG	chr14:g.38061348CAGCGCTGCTGG>C	FOXA1	LoF	p.N210Kfs*13	N/.	210	-	ENST00000250448	473.0	2
37	Very high	BRCA	c.641G>A	Nonsense	893	predicted	TIER 1	2	chr14:g.38061348C>T	chr14:g.38061348C>T	FOXA1	LoF	p.W214*	W/*	214	-	ENST00000250448	473.0	2
37	Very high	BRCA	c.1234C>T	Nonsense	743	predicted	TIER 1	2	chr14:g.38060755G>A	chr14:g.38060755G>A	FOXA1	LoF	p.Q412*	Q/*	412	-	ENST00000250448	473.0	2
37	Very high	BRCA	c.666C>A	Nonsense	1844	predicted	TIER 1	3	chr10:g.8100692C>A	chr10:g.8100692C>A	GATA3	LoF	p.Y222*	Y/*	222	+	ENST00000379328	445.0	6
37	Very high	BRCA	c.40_51dupGCCGCCGCCGCT	InFrameInsertion	2066	predicted	TIER 2	1	chrX:g.44732837_44732848dupGCCGCCGCCGCT	chrX:g.44732825A>ACCGCCGCCGCTG	KDM6A	LoF	p.A14_A17dupAAAA	-/AAAA	14	+	ENST00000377967	1402.0	29
37	Very high	BRCA	c.3114_3119delCTCAGA	InFrameDeletion	3873	predicted	TIER 2	14	chr5:g.56178141_56178146delCTCAGA	chr5:g.56178137AAGACTC>A	MAP3K1	LoF	p.S1039_D1040delSD	SD/-	1039	+	ENST00000399503	1513.0	20
37	Very high	BRCA	c.2233C>T	Nonsense	3602	predicted	TIER 1	13	chr5:g.56176963C>T	chr5:g.56176963C>T	MAP3K1	LoF	p.Q745*	Q/*	745	+	ENST00000399503	1513.0	20
37	Very high	BRCA	c.1321C>T	Nonsense	1537	predicted	TIER 1	9	chr2:g.141816539G>A	chr2:g.141816539G>A	LRP1B	LoF	p.R441*	R/*	441	-	ENST00000389484	4600.0	91
37	Very high	BRCA	c.1407_1415delGGCCGAGGC	InFrameDeletion	806	predicted	TIER 2	10	chr11:g.64572248_64572256delGCCTCGGCC	chr11:g.64572238GGCCTCGGCC>G	MEN1	LoF	p.A470_A472delAEA	AEA/-	470	-	ENST00000443283	616.0	10
37	Very high	BRCA	c.1318C>T	Nonsense	3524	known	TIER 1	12	chr17:g.29533315C>T	chr17:g.29533315C>T	NF1	LoF	p.R440*	R/*	440	+	ENST00000358273	2840.0	58
37	Very high	BRCA	c.1319_1324delGAAATA	MultiAAMissense	3523	predicted	TIER 1	12	chr17:g.29533316_29533321delGAAATA	chr17:g.29533315CGAAATA>C	NF1	LoF	p.R440_M442delinsL	insL/-	440	+	ENST00000358273	2840.0	58
37	Very high	BRCA	c.1040delA	Frameshift	3373	predicted	TIER 1	9	chr17:g.29527591delA	chr17:g.29527590CA>C	NF1	LoF	p.Q347Rfs*29	Q/.	347	+	ENST00000358273	2840.0	58
37	Very high	BRCA	c.7118_7135dupATCATCCTTTCCCAGCCT	InFrameInsertion	4419	predicted	TIER 2	34	chr1:g.120458219_120458236dupAAGGATGATAGGCTGGGA	chr1:g.120458209G>GAGGCTGGGAAAGGATGAT	NOTCH2	ambiguous	p.Y2373_A2378dupYHPFPA	-/YHPFPA	2373	-	ENST00000256646	2472.0	34
37	Very high	BRCA	c.892dupT	Frameshift	4561	predicted	TIER 1	7	chr5:g.67576810dupT	chr5:g.67576809A>AT	PIK3R1	LoF	p.W298Lfs*3	W/.	298	+	ENST00000521381	725.0	16
37	Very high	BRCA	c.6492_6495delGAGA	Frameshift	3285	predicted	TIER 2	42	chr4:g.87720329_87720332delGAGA	chr4:g.87720325TAGAG>T	PTPN13	ambiguous	p.R2165Qfs*13	R/.	2165	+	ENST00000436978	2491.0	48
37	Very high	BRCA	c.4922C>G	Nonsense	2658	predicted	TIER 2	31	chr4:g.87692427C>G	chr4:g.87692427C>G	PTPN13	ambiguous	p.S1641*	S/*	1641	+	ENST00000436978	2491.0	48
37	Very high	BRCA	c.4919_4923delTGTCA	Frameshift	2657	predicted	TIER 2	31	chr4:g.87692424_87692428delTGTCA	chr4:g.87692422AATGTC>A	PTPN13	ambiguous	p.M1640Rfs*18	M/.	1640	+	ENST00000436978	2491.0	48
37	Very high	BRCA	c.3913A>T	Nonsense	2274	predicted	TIER 2	24	chr4:g.87684239A>T	chr4:g.87684239A>T	PTPN13	ambiguous	p.K1305*	K/*	1305	+	ENST00000436978	2491.0	48
37	Very high	BRCA	c.3197C>A	Nonsense	1962	predicted	TIER 2	20	chr4:g.87674192C>A	chr4:g.87674192C>A	PTPN13	ambiguous	p.S1066*	S/*	1066	+	ENST00000436978	2491.0	48
37	Very high	BRCA	c.2187T>G	Nonsense	1560	predicted	TIER 2	15	chr4:g.87656782T>G	chr4:g.87656782T>G	PTPN13	ambiguous	p.Y729*	Y/*	729	+	ENST00000436978	2491.0	48
37	Very high	BRCA	c.1711C>T	Nonsense	1384	predicted	TIER 2	12	chr4:g.87653772C>T	chr4:g.87653772C>T	PTPN13	ambiguous	p.R571*	R/*	571	+	ENST00000436978	2491.0	48
37	Very high	BRCA	c.1491_1494delACAG	Frameshift	1260	predicted	TIER 2	10	chr4:g.87643470_87643473delACAG	chr4:g.87643467TAGAC>T	PTPN13	ambiguous	p.R497Sfs*4	R/.	497	+	ENST00000436978	2491.0	48
37	Very high	BRCA	c.1096C>T	Nonsense	1060	predicted	TIER 2	7	chr4:g.87622855C>T	chr4:g.87622855C>T	PTPN13	ambiguous	p.R366*	R/*	366	+	ENST00000436978	2491.0	48
37	Very high	BRCA	c.78_82delTCAAA	Frameshift	606	predicted	TIER 2	2	chr4:g.87556487_87556491delTCAAA	chr4:g.87556483TAAATC>T	PTPN13	ambiguous	p.N26Kfs*3	N/.	26	+	ENST00000436978	2491.0	48
37	Very high	BRCA	c.65G>A	Nonsense	603	predicted	TIER 2	2	chr4:g.87556474G>A	chr4:g.87556474G>A	PTPN13	ambiguous	p.W22*	W/*	22	+	ENST00000436978	2491.0	48
37	Very high	BRCA	c.2037delA	Frameshift	1056	predicted	TIER 1	23	chr9:g.8500849delT	chr9:g.8500844AT>A	PTPRD	LoF	p.K679Nfs*9	K/.	679	-	ENST00000381196	1913.0	43
37	Very high	BRCA	c.2908C>T	Nonsense	539	predicted	TIER 1	27	chr9:g.8485909G>A	chr9:g.8485909G>A	PTPRD	LoF	p.Q970*	Q/*	970	-	ENST00000381196	1913.0	43
37	Very high	BRCA	c.424C>T	Nonsense	4173	predicted	TIER 2	7	chr1:g.241033381G>A	chr1:g.241033381G>A	RGS7	ambiguous	p.R142*	R/*	142	-	ENST00000366565	488.0	18
37	Very high	BRCA	c.48_50dupGGA	InFrameInsertion	2426	predicted	TIER 2	1	chr20:g.50418904_50418906dupTCC	chr20:g.50418897G>GTCC	SALL4	ambiguous	p.E16dupE	-/E	16	-	ENST00000217086	1054.0	4
37	Very high	BRCA	c.10060_10068delCCTCAGCCT	InFrameDeletion	3616	predicted	TIER 2	12	chr1:g.16263691_16263699delCCTCAGCCT	chr1:g.16263684GCAGCCTCCT>G	SPEN	ambiguous	p.P3354_P3356delPQP	PQP/-	3354	+	ENST00000375759	3665.0	15
37	Very high	BRCA	c.7283_7333delCCCCAGACCTTCCCCCACCTCCCCAGCCAGCACCGGTGGATGAGGAGCCTC	InFrameDeletion	2803	predicted	TIER 2	11	chr1:g.16260018_16260068delCCCCAGACCTTCCCCCACCTCCCCAGCCAGCACCGGTGGATGAGGAGCCTC	chr1:g.16260016GCCCCCAGACCTTCCCCCACCTCCCCAGCCAGCACCGGTGGATGAGGAGCCT>G	SPEN	ambiguous	p.P2428_P2444delPPDLPPPPQPAPVDEEP	PPDLPPPPQPAPVDEEP/-	2428	+	ENST00000375759	3665.0	15
37	Very high	BRCA	c.5891_5892delAG	Frameshift	2410	predicted	TIER 2	11	chr1:g.16258626_16258627delAG	chr1:g.16258624GGA>G	SPEN	ambiguous	p.E1964Gfs*15	E/.	1964	+	ENST00000375759	3665.0	15
37	Very high	BRCA	c.5888delA	Frameshift	2409	predicted	TIER 2	11	chr1:g.16258623delA	chr1:g.16258622GA>G	SPEN	ambiguous	p.E1963Gfs*59	E/.	1963	+	ENST00000375759	3665.0	15
37	Very high	BRCA	c.5893_5895delGAG	InFrameDeletion	2408	predicted	TIER 2	11	chr1:g.16258628_16258630delGAG	chr1:g.16258621AGAG>A	SPEN	ambiguous	p.E1965delE	E/-	1965	+	ENST00000375759	3665.0	15
37	Very high	BRCA	c.322_330delATCCAGCAG	InFrameDeletion	86	predicted	TIER 2	2	chr12:g.50480088_50480096delATCCAGCAG	chr12:g.50480081TCAGCAGATC>T	SMARCD1	ambiguous	p.I108_Q110delIQQ	IQQ/-	108	+	ENST00000394963	516.0	13
37	Very high	BRCA	c.234_263delAGCTCCTACACCGGCGGCCCCTGCACCAGC	InFrameDeletion	439	predicted	TIER 2	4	chr17:g.7579439_7579468delGCCGGTGTAGGAGCTGCTGGTGCAGGGGCC	chr17:g.7579423GGCTGGTGCAGGGGCCGCCGGTGTAGGAGCT>G	TP53	LoF	p.A79_A88delAPTPAAPAPA	APTPAAPAPA/-	79	-	ENST00000269305	394.0	11
37	Very high	BRCA	c.869_870insGCGGAAACCG	Frameshift	151	predicted	TIER 1	8	chr17:g.7577071_7577072insTTTCCGCCGG	chr17:g.7577068G>GCGGTTTCCGC	TP53	LoF	p.K291Rfs*18	K/.	291	-	ENST00000269305	394.0	11
37	Very high	BRCA	c.1784_1789delGAACTC	MultiAAMissense	1868	predicted	TIER 1	25	chr17:g.5045763_5045768delGAACTC	chr17:g.5045762GGAACTC>G	USP6	Act	p.G595_Q597delinsE	insE/-	595	+	ENST00000574788	1407.0	38
37	Very high	BRCA	c.952C>T	Nonsense	4776	predicted	TIER 1	10	chr20:g.31019455C>T	chr20:g.31019455C>T	ASXL1	LoF	p.Q318*	Q/*	318	+	ENST00000375687	1542.0	13
37	Very high	BRCA	c.229C>T	Nonsense	4370	predicted	TIER 1	4	chr20:g.30956903C>T	chr20:g.30956903C>T	ASXL1	LoF	p.R77*	R/*	77	+	ENST00000375687	1542.0	13
37	Very high	BRCA	c.974G>A	Nonsense	3872	predicted	TIER 1	2	chr4:g.187630008C>T	chr4:g.187630008C>T	FAT1	LoF	p.W325*	W/*	325	-	ENST00000441802	4589.0	27
37	Very high	BRCA	c.1009C>T	Nonsense	3856	predicted	TIER 1	2	chr4:g.187629973G>A	chr4:g.187629973G>A	FAT1	LoF	p.Q337*	Q/*	337	-	ENST00000441802	4589.0	27
37	Very high	BRCA	c.2678T>A	Nonsense	3336	predicted	TIER 1	2	chr4:g.187628304A>T	chr4:g.187628304A>T	FAT1	LoF	p.L893*	L/*	893	-	ENST00000441802	4589.0	27
37	Very high	BRCA	c.2839_2840delAT	Frameshift	3285	predicted	TIER 1	2	chr4:g.187628142_187628143delAT	chr4:g.187628141CAT>C	FAT1	LoF	p.M947Vfs*8	M/.	947	-	ENST00000441802	4589.0	27
37	Very high	BRCA	c.3863_3865delCCT	InFrameDeletion	2853	predicted	TIER 2	5	chr4:g.187557848_187557850delGAG	chr4:g.187557845TAGG>T	FAT1	LoF	p.S1288delS	S/-	1288	-	ENST00000441802	4589.0	27
37	Very high	BRCA	c.5630dupC	Frameshift	2156	predicted	TIER 1	10	chr4:g.187542115dupG	chr4:g.187542109A>AG	FAT1	LoF	p.V1878Cfs*8	V/.	1878	-	ENST00000441802	4589.0	27
37	Very high	BRCA	c.5737C>T	Nonsense	2132	predicted	TIER 1	10	chr4:g.187542003G>A	chr4:g.187542003G>A	FAT1	LoF	p.Q1913*	Q/*	1913	-	ENST00000441802	4589.0	27
37	Very high	BRCA	c.6676C>T	Nonsense	1846	predicted	TIER 1	10	chr4:g.187541064G>A	chr4:g.187541064G>A	FAT1	LoF	p.Q2226*	Q/*	2226	-	ENST00000441802	4589.0	27
37	Very high	BRCA	c.7789C>T	Nonsense	1509	predicted	TIER 1	10	chr4:g.187539951G>A	chr4:g.187539951G>A	FAT1	LoF	p.R2597*	R/*	2597	-	ENST00000441802	4589.0	27
37	Very high	BRCA	c.1318_1320delAAG	InFrameDeletion	4539	predicted	TIER 2	1	chr11:g.92086596_92086598delAAG	chr11:g.92086592TAAG>T	FAT3	ambiguous	p.K440delK	K/-	440	+	ENST00000298047	4590.0	27
37	Very high	BRCA	c.652C>T	Nonsense	4326	predicted	TIER 2	1	chr11:g.92085930C>T	chr11:g.92085930C>T	FAT3	ambiguous	p.R218*	R/*	218	+	ENST00000298047	4590.0	27
37	Very high	BRCA	c.3562C>T	Nonsense	4822	predicted	TIER 1	1	chr4:g.126241128C>T	chr4:g.126241128C>T	FAT4	LoF	p.Q1188*	Q/*	1188	+	ENST00000394329	4982.0	17
37	Very high	BRCA	c.3040C>T	Nonsense	4691	predicted	TIER 1	1	chr4:g.126240606C>T	chr4:g.126240606C>T	FAT4	LoF	p.R1014*	R/*	1014	+	ENST00000394329	4982.0	17
37	Very high	BRCA	c.2657delT	Frameshift	4591	predicted	TIER 1	1	chr4:g.126240223delT	chr4:g.126240220AT>A	FAT4	LoF	p.L886*fs*1	L/.	886	+	ENST00000394329	4982.0	17
37	Very high	BRCA	c.2284C>T	Nonsense	4494	predicted	TIER 1	1	chr4:g.126239850C>T	chr4:g.126239850C>T	FAT4	LoF	p.Q762*	Q/*	762	+	ENST00000394329	4982.0	17
37	Very high	BRCA	c.10552_10554delGTG	InFrameDeletion	2527	predicted	TIER 2	17	chr11:g.92573911_92573913delGTG	chr11:g.92573910CGTG>C	FAT3	ambiguous	p.V3518delV	V/-	3518	+	ENST00000298047	4590.0	27
37	Very high	BRCA	c.7048C>T	Nonsense	1351	predicted	TIER 2	9	chr11:g.92533227C>T	chr11:g.92533227C>T	FAT3	ambiguous	p.R2350*	R/*	2350	+	ENST00000298047	4590.0	27
37	Very high	BRCA	c.3124C>T	Nonsense	3182	predicted	TIER 1	19	chr7:g.151921554G>A	chr7:g.151921554G>A	MLL3	LoF	p.Q1042*	Q/*	1042	-	ENST00000262189	4912.0	59
37	Very high	BRCA	c.3590_3592delGAA	InFrameDeletion	2964	predicted	TIER 2	23	chr7:g.151917733_151917735delCTT	chr7:g.151917727TTTC>T	MLL3	LoF	p.R1197delR	R/-	1197	-	ENST00000262189	4912.0	59
37	Very high	BRCA	c.3709C>T	Nonsense	2938	predicted	TIER 1	23	chr7:g.151917611G>A	chr7:g.151917611G>A	MLL3	LoF	p.R1237*	R/*	1237	-	ENST00000262189	4912.0	59
37	Very high	BRCA	c.5349_5351dupGCA	InFrameInsertion	2185	predicted	TIER 2	36	chr7:g.151879607_151879609dupGCT	chr7:g.151879593T>TTGC	MLL3	LoF	p.Q1787dupQ	-/Q	1787	-	ENST00000262189	4912.0	59
37	Very high	BRCA	c.6196C>T	Nonsense	1932	predicted	TIER 1	36	chr7:g.151878749G>A	chr7:g.151878749G>A	MLL3	LoF	p.R2066*	R/*	2066	-	ENST00000262189	4912.0	59
37	Very high	BRCA	c.1731_1757delGGAGTCACCCATGTCCCCTCCACCTGA	InFrameDeletion	4677	predicted	TIER 2	10	chr12:g.49445717_49445743delAGGGGACATGGGTGACTCCTCAGGTGG	chr12:g.49445708TTCAGGTGGAGGGGACATGGGTGACTCC>T	MLL2	LoF	p.E587_E595delESPMSPPPE	ESPMSPPPE/-	587	-	ENST00000301067	5538.0	54
37	Very high	BRCA	c.3637C>T	Nonsense	4015	predicted	TIER 1	11	chr12:g.49443734G>A	chr12:g.49443734G>A	MLL2	LoF	p.Q1213*	Q/*	1213	-	ENST00000301067	5538.0	54
37	Very high	BRCA	c.4485C>A	Nonsense	3648	predicted	TIER 1	16	chr12:g.49440141G>T	chr12:g.49440141G>T	MLL2	LoF	p.Y1495*	Y/*	1495	-	ENST00000301067	5538.0	54
37	Very high	BRCA	c.5257_5259delAAG	InFrameDeletion	3241	predicted	TIER 2	22	chr12:g.49437719_49437721delTCT	chr12:g.49437710GCTT>G	MLL2	LoF	p.K1753delK	K/-	1753	-	ENST00000301067	5538.0	54
37	Very high	BRCA	c.5642_5644delAAG	SpliceDonorDeletion	3070	predicted	TIER 1	25	chr12:g.49436861_49436863delTCT	chr12:g.49436858CCTT>C	MLL2	LoF	.	./.	.	-	ENST00000301067	5538.0	54
37	Very high	BRCA	c.6709C>T	Nonsense	2572	predicted	TIER 1	31	chr12:g.49434844G>A	chr12:g.49434844G>A	MLL2	LoF	p.Q2237*	Q/*	2237	-	ENST00000301067	5538.0	54
37	Very high	BRCA	c.7022_7027dupAGAGCC	InFrameInsertion	2475	predicted	TIER 2	31	chr12:g.49434528_49434533dupCTCTGG	chr12:g.49434525G>GGGCTCT	MLL2	LoF	p.Q2341_S2342dupQS	-/QS	2341	-	ENST00000301067	5538.0	54
37	Very high	BRCA	c.9831_9833dupGCA	InFrameInsertion	1638	predicted	TIER 2	34	chr12:g.49431317_49431319dupCTG	chr12:g.49431305T>TTGC	MLL2	LoF	p.Q3282dupQ	-/Q	3282	-	ENST00000301067	5538.0	54
37	Very high	BRCA	c.11717_11722dupTGCAAC	InFrameInsertion	1045	predicted	TIER 2	39	chr12:g.49426767_49426772dupTTGCAG	chr12:g.49426765T>TGTTGCA	MLL2	LoF	p.L3906_Q3907dupLQ	-/LQ	3906	-	ENST00000301067	5538.0	54
37	Very high	BRCA	c.11729_11734dupAGCAAC	InFrameInsertion	1041	predicted	TIER 2	39	chr12:g.49426765_49426770dupTGTTGC	chr12:g.49426753A>AGTTGCT	MLL2	LoF	p.Q3910_Q3911dupQQ	-/QQ	3910	-	ENST00000301067	5538.0	54
37	Very high	BRCA	c.11750_11758dupAGCAGCAGC	InFrameInsertion	1032	predicted	TIER 2	39	chr12:g.49426743_49426751dupCTGCTGCTG	chr12:g.49426729A>AGCTGCTGCT	MLL2	LoF	p.Q3917_Q3919dupQQQ	-/QQQ	3917	-	ENST00000301067	5538.0	54
37	Very high	BRCA	c.11792_11809dupTTCAACAGCAGCAACAGC	InFrameInsertion	1015	predicted	TIER 2	39	chr12:g.49426692_49426709dupTTGAAGCTGTTGCTGCTG	chr12:g.49426678T>TGCTGTTGCTGCTGTTGAA	MLL2	LoF	p.L3931_Q3936dupLQQQQQ	-/LQQQQQ	3931	-	ENST00000301067	5538.0	54
37	Very high	BRCA	c.11826_11828delACA	InFrameDeletion	1003	predicted	TIER 2	39	chr12:g.49426665_49426667delTTG	chr12:g.49426659CTGT>C	MLL2	LoF	p.Q3947delQ	Q/-	3947	-	ENST00000301067	5538.0	54
37	Very high	BRCA	c.11817_11837delGCTTCAACAACAGCAGCAGCA	InFrameDeletion	1001	predicted	TIER 2	39	chr12:g.49426665_49426685delTTGAAGCTGCTGCTGCTGTTG	chr12:g.49426650TTGCTGCTGCTGTTGTTGAAGC>T	MLL2	LoF	p.L3940_Q3946delLQQQQQQ	LQQQQQQ/-	3940	-	ENST00000301067	5538.0	54
37	Very high	BRCA	c.11835_11837delGCA	InFrameDeletion	1000	predicted	TIER 2	39	chr12:g.49426659_49426661delCTG	chr12:g.49426650TTGC>T	MLL2	LoF	p.Q3947delQ	Q/-	3947	-	ENST00000301067	5538.0	54
37	Very high	BRCA	c.11801_11842delAGCAACAGCAGCAGCAGCTTCAACAACAGCAGCAGCAACAGC	InFrameDeletion	999	predicted	TIER 2	39	chr12:g.49426653_49426694delCTGCTGCTGTTGTTGAAGCTGCTGCTGCTGTTGCTGCTGTTG	chr12:g.49426645AGCTGTTGCTGCTGCTGTTGTTGAAGCTGCTGCTGCTGTTGCT>A	MLL2	LoF	p.Q3934_Q3947delQQQQQQLQQQQQQQ	QQQQQQLQQQQQQQ/-	3934	-	ENST00000301067	5538.0	54
37	Very high	BRCA	c.11826_11849delACAGCAGCAGCAACAGCTTCAACA	InFrameDeletion	995	predicted	TIER 2	39	chr12:g.49426650_49426673delTTGCTGCTGCTGTTGTTGAAGCTG	chr12:g.49426638CTGTTGAAGCTGTTGCTGCTGCTGT>C	MLL2	LoF	p.Q3947_Q3954delQLQQQQQQ	QLQQQQQQ/-	3947	-	ENST00000301067	5538.0	54
37	Very high	BRCA	c.11843_11860delTTCAACAGCAGCAACAGC	InFrameDeletion	993	predicted	TIER 2	39	chr12:g.49426641_49426658delTTGAAGCTGTTGCTGCTG	chr12:g.49426627TGCTGTTGCTGCTGTTGAA>T	MLL2	LoF	p.L3948_Q3953delLQQQQQ	LQQQQQ/-	3948	-	ENST00000301067	5538.0	54
37	Very high	BRCA	c.11813_11863delAGCAGCTTCAACAACAGCAGCAGCAACAGCTTCAACAGCAGCAACAGCAGC	InFrameDeletion	990	predicted	TIER 2	39	chr12:g.49426659_49426709delCTGTTGTTGAAGCTGCTGCTGCTGTTGCTGCTGTTGAAGCTGTTGCTGCTG	chr12:g.49426624AGCTGCTGTTGCTGCTGTTGAAGCTGTTGCTGCTGCTGTTGTTGAAGCTGCT>A	MLL2	LoF	p.Q3938_Q3954delQQLQQQQQQQLQQQQQQ	QQLQQQQQQQLQQQQQQ/-	3938	-	ENST00000301067	5538.0	54
37	Very high	BRCA	c.11844_11879dupTCAACAGCAGCAACAGCAGCTACAACAGCAACAGCA	InFrameInsertion	984	predicted	TIER 2	39	chr12:g.49426609_49426644dupTGCTGTTGCTGTTGTAGCTGCTGTTGCTGCTGTTGA	chr12:g.49426608T>TTGCTGTTGCTGTTGTAGCTGCTGTTGCTGCTGTTGA	MLL2	LoF	p.Q3959_Q3960insHQQQQQQLQQQQ	-/HQQQQQQLQQQQ	3959	-	ENST00000301067	5538.0	54
37	Very high	BRCA	c.11864_11893delTACAACAGCAACAGCAACAACAACAGCAGC	InFrameDeletion	973	predicted	TIER 2	39	chr12:g.49426605_49426634delTTGTTGCTGTTGCTGTTGTAGCTGCTGTTG	chr12:g.49426594TGCTGCTGTTGTTGTTGCTGTTGCTGTTGTA>T	MLL2	LoF	p.L3955_Q3964delLQQQQQQQQQ	LQQQQQQQQQ/-	3955	-	ENST00000301067	5538.0	54
37	Very high	BRCA	c.11896_11910delTTTCAACAGCAGCAG	InFrameDeletion	968	predicted	TIER 2	39	chr12:g.49426590_49426604delAAACTGCTGCTGTTG	chr12:g.49426577GCTGCTGCTGTTGAAA>G	MLL2	LoF	p.F3966_Q3970delFQQQQ	FQQQQ/-	3966	-	ENST00000301067	5538.0	54
37	Very high	BRCA	c.11896_11922dupTTTCAACAGCAGCAGCAACAGCAGCAG	InFrameInsertion	962	predicted	TIER 2	39	chr12:g.49426578_49426604dupCTGCTGCTGTTGAAACTGCTGCTGTTG	chr12:g.49426565T>TCTGCTGCTGTTGCTGCTGCTGTTGAAA	MLL2	LoF	p.F3966_Q3974dupFQQQQQQQQ	-/FQQQQQQQQ	3966	-	ENST00000301067	5538.0	54
37	Very high	BRCA	c.182_193dupAGCAGCAACAGC	InFrameInsertion	3416	predicted	TIER 2	3	chr17:g.16089928_16089939dupTGCTGTTGCTGC	chr17:g.16089916A>AGCTGTTGCTGCT	NCOR1	LoF	p.Q61_Q64dupQQQQ	-/QQQQ	61	-	ENST00000268712	2441.0	46
37	Very high	BRCA	c.448G>T	Nonsense	3309	predicted	TIER 1	5	chr17:g.16068463C>A	chr17:g.16068463C>A	NCOR1	LoF	p.G150*	G/*	150	-	ENST00000268712	2441.0	46
37	Very high	BRCA	c.1549_1551delAAA	InFrameDeletion	2862	predicted	TIER 2	15	chr17:g.16029481_16029483delTTT	chr17:g.16029478CTTT>C	NCOR1	LoF	p.K517delK	K/-	517	-	ENST00000268712	2441.0	46
37	Very high	BRCA	c.1554_1556delAGA	InFrameDeletion	2860	predicted	TIER 2	15	chr17:g.16029478_16029480delCTT	chr17:g.16029473CTCT>C	NCOR1	LoF	p.E519delE	E/-	519	-	ENST00000268712	2441.0	46
37	Very high	BRCA	c.1574_1582delCAGAAAAAA	InFrameDeletion	2856	predicted	TIER 2	15	chr17:g.16029457_16029465delTTTTTTCTG	chr17:g.16029447TTTTTTTCTG>T	NCOR1	LoF	p.T525_K527delTEK	TEK/-	525	-	ENST00000268712	2441.0	46
37	Very high	BRCA	c.1591_1593delGAA	InFrameDeletion	2848	predicted	TIER 2	15	chr17:g.16029445_16029447delCTT	chr17:g.16029436TTTC>T	NCOR1	LoF	p.E531delE	E/-	531	-	ENST00000268712	2441.0	46
37	Very high	BRCA	c.2230C>T	Nonsense	2588	predicted	TIER 1	20	chr17:g.16005024G>A	chr17:g.16005024G>A	NCOR1	LoF	p.R744*	R/*	744	-	ENST00000268712	2441.0	46
37	Very high	BRCA	c.2884C>T	Nonsense	2349	predicted	TIER 1	22	chr17:g.15995309G>A	chr17:g.15995309G>A	NCOR1	LoF	p.R962*	R/*	962	-	ENST00000268712	2441.0	46
37	Very high	BRCA	c.5239C>T	Nonsense	1308	predicted	TIER 1	36	chr17:g.15965567G>A	chr17:g.15965567G>A	NCOR1	LoF	p.R1747*	R/*	1747	-	ENST00000268712	2441.0	46
37	Very high	BRCA	c.1659_1660dupCA	Frameshift	1562	predicted	TIER 2	13	chr19:g.50910404_50910405dupCA	chr19:g.50910403T>TCA	POLD1	ambiguous	p.K554Tfs*17	K/.	554	+	ENST00000440232	1108.0	27
37	Very high	BRCA	c.583C>T	Nonsense	930	predicted	TIER 2	5	chr19:g.50905375C>T	chr19:g.50905375C>T	POLD1	ambiguous	p.R195*	R/*	195	+	ENST00000440232	1108.0	27
37	Very high	BRCA	c.157_162delCAGGAG	InFrameDeletion	651	predicted	TIER 2	2	chr19:g.50902265_50902270delCAGGAG	chr19:g.50902257TGCAGGA>T	POLD1	ambiguous	p.Q53_E54delQE	QE/-	53	+	ENST00000440232	1108.0	27
37	Very high	BRCA	c.67C>T	Nonsense	3105	predicted	TIER 1	2	chr16:g.72993978G>A	chr16:g.72993978G>A	ZFHX3	LoF	p.Q23*	Q/*	23	-	ENST00000268489	3704.0	10
37	Very high	BRCA	c.358_369delGGGGACGAGGAG	InFrameDeletion	2969	predicted	TIER 2	2	chr16:g.72993682_72993693delGTCCCCCTCCTC	chr16:g.72993675TCTCCTCGTCCCC>T	ZFHX3	LoF	p.G120_E123delGDEE	GDEE/-	120	-	ENST00000268489	3704.0	10
37	Very high	BRCA	c.1183_1184insGTC	InFrameInsertion	2657	predicted	TIER 2	2	chr16:g.72992861_72992862insGAC	chr16:g.72992861A>AGAC	ZFHX3	LoF	p.L394_L395insC	-/C	394	-	ENST00000268489	3704.0	10
37	Very high	BRCA	c.1388_1405delCGGAGGAGGAAGAGGAGG	InFrameDeletion	2566	predicted	TIER 2	2	chr16:g.72992650_72992667delCTCCTCCGCCTCCTCTTC	chr16:g.72992639TCCTCCTCTTCCTCCTCCG>T	ZFHX3	LoF	p.A463_E468delAEEEEE	AEEEEE/-	463	-	ENST00000268489	3704.0	10
37	Very high	BRCA	c.1407_1409delGGA	InFrameDeletion	2565	predicted	TIER 2	2	chr16:g.72992644_72992646delCTC	chr16:g.72992635TTCC>T	ZFHX3	LoF	p.E471delE	E/-	471	-	ENST00000268489	3704.0	10
37	Very high	BRCA	c.1403_1414delAGGAGGAAGAGG	InFrameDeletion	2561	predicted	TIER 2	2	chr16:g.72992645_72992656delTCTTCCTCCTCC	chr16:g.72992630GCCTCTTCCTCCT>G	ZFHX3	LoF	p.E468_E471delEEEE	EEEE/-	468	-	ENST00000268489	3704.0	10
37	Very high	BRCA	c.1403_1414dupAGGAGGAAGAGG	InFrameInsertion	2558	predicted	TIER 2	2	chr16:g.72992645_72992656dupTCTTCCTCCTCC	chr16:g.72992630G>GCCTCTTCCTCCT	ZFHX3	LoF	p.E468_E471dupEEEE	-/EEEE	468	-	ENST00000268489	3704.0	10
37	Very high	BRCA	c.1410_1424dupAGAGGCGGAGGAGGA	InFrameInsertion	2548	predicted	TIER 2	2	chr16:g.72992630_72992644dupGCCTCTTCCTCCTCC	chr16:g.72992620C>CTCCTCCTCCGCCTCT	ZFHX3	LoF	p.A472_E476dupAEEEE	-/AEEEE	472	-	ENST00000268489	3704.0	10
37	Very high	BRCA	c.1410_1427dupAGAGGCGGAGGAGGAGGA	InFrameInsertion	2545	predicted	TIER 2	2	chr16:g.72992629_72992646dupCGCCTCTTCCTCCTCCTC	chr16:g.72992617C>CTCCTCCTCCTCCGCCTCT	ZFHX3	LoF	p.A472_E477dupAEEEEE	-/AEEEEE	472	-	ENST00000268489	3704.0	10
37	Very high	BRCA	c.1395_1430dupGGAAGAGGAGGAGGAAGAGGCGGAGGAGGAGGAGGA	InFrameInsertion	2539	predicted	TIER 2	2	chr16:g.72992621_72992656dupTCCTCCTCCGCCTCTTCCTCCTCCTCTTCCTCCTCC	chr16:g.72992614T>TTCCTCCTCCTCCTCCGCCTCTTCCTCCTCCTCTTCC	ZFHX3	LoF	p.A472_E483dupAEEEEEEEEEEE	-/AEEEEEEEEEEE	472	-	ENST00000268489	3704.0	10
37	Very high	BRCA	c.1413_1433dupGGCGGAGGAGGAGGAGGAAGA	InFrameInsertion	2535	predicted	TIER 2	2	chr16:g.72992626_72992646dupCTCCGCCTCTTCCTCCTCCTC	chr16:g.72992611T>TTCTTCCTCCTCCTCCTCCGCC	ZFHX3	LoF	p.A472_E478dupAEEEEEE	-/AEEEEEE	472	-	ENST00000268489	3704.0	10
37	Very high	BRCA	c.4104_4106dupCCA	InFrameInsertion	1307	predicted	TIER 2	9	chr16:g.72832476_72832478dupGGT	chr16:g.72832474C>CTGG	ZFHX3	LoF	p.N1368_Q1369insH	-/H	1368	-	ENST00000268489	3704.0	10
37	Very high	BRCA	c.4381C>T	Nonsense	1231	predicted	TIER 1	9	chr16:g.72832200G>A	chr16:g.72832200G>A	ZFHX3	LoF	p.Q1461*	Q/*	1461	-	ENST00000268489	3704.0	10
37	Very high	BRCA	c.5124_5132delAGAGGCCAA	InFrameDeletion	1013	predicted	TIER 2	9	chr16:g.72831453_72831461delCCTCTTTGG	chr16:g.72831448ATTGGCCTCT>A	ZFHX3	LoF	p.K1708_A1710delKEA	KEA/-	1708	-	ENST00000268489	3704.0	10
37	Very high	BRCA	c.5172_5174delGCA	InFrameDeletion	996	predicted	TIER 2	9	chr16:g.72831413_72831415delTGC	chr16:g.72831406TTGC>T	ZFHX3	LoF	p.Q1741delQ	Q/-	1741	-	ENST00000268489	3704.0	10
37	Very high	BRCA	c.5178_5192delACAGCAGCAGCAACA	InFrameDeletion	981	predicted	TIER 2	9	chr16:g.72831401_72831415delTGTTGTTGCTGCTGC	chr16:g.72831388CTGTTGCTGCTGCTGT>C	ZFHX3	LoF	p.Q1737_Q1741delQQQQQ	QQQQQ/-	1737	-	ENST00000268489	3704.0	10
37	Very high	BRCA	c.5184_5195delGCAGCAACAGCA	InFrameDeletion	977	predicted	TIER 2	9	chr16:g.72831394_72831405delCTGCTGCTGTTG	chr16:g.72831385TTGCTGTTGCTGC>T	ZFHX3	LoF	p.Q1738_Q1741delQQQQ	QQQQ/-	1738	-	ENST00000268489	3704.0	10
37	Very high	BRCA	c.5187_5195delGCAACAGCA	InFrameDeletion	976	predicted	TIER 2	9	chr16:g.72831391_72831399delTTGCTGCTG	chr16:g.72831385TTGCTGTTGC>T	ZFHX3	LoF	p.Q1739_Q1741delQQQ	QQQ/-	1739	-	ENST00000268489	3704.0	10
37	Very high	BRCA	c.5195_5196insGCAACA	InFrameInsertion	975	predicted	TIER 2	9	chr16:g.72831387_72831388insTTGCTG	chr16:g.72831385T>TTGTTGC	ZFHX3	LoF	p.Q1740_Q1741dupQQ	-/QQ	1740	-	ENST00000268489	3704.0	10
37	Very high	BRCA	c.5193_5195dupGCA	InFrameInsertion	974	predicted	TIER 2	9	chr16:g.72831388_72831390dupCTG	chr16:g.72831385T>TTGC	ZFHX3	LoF	p.Q1741dupQ	-/Q	1741	-	ENST00000268489	3704.0	10
37	Very high	BRCA	c.5193_5198delGCAACA	InFrameDeletion	972	predicted	TIER 2	9	chr16:g.72831391_72831396delTTGCTG	chr16:g.72831382TTGTTGC>T	ZFHX3	LoF	p.Q1740_Q1741delQQ	QQ/-	1740	-	ENST00000268489	3704.0	10
37	Very high	BRCA	c.5181_5201delGCAGCAGCAACAGCAACAACA	InFrameDeletion	969	predicted	TIER 2	9	chr16:g.72831391_72831411delTTGCTGCTGCTGTTGTTGCTG	chr16:g.72831379TTGTTGTTGCTGTTGCTGCTGC>T	ZFHX3	LoF	p.Q1735_Q1741delQQQQQQQ	QQQQQQQ/-	1735	-	ENST00000268489	3704.0	10
37	Very high	BRCA	c.5187_5207dupGCAACAGCAACAACAACAACA	InFrameInsertion	966	predicted	TIER 2	9	chr16:g.72831376_72831396dupTTGTTGTTGTTGCTGTTGCTG	chr16:g.72831373T>TTGTTGTTGTTGTTGCTGTTGC	ZFHX3	LoF	p.Q1735_Q1741dupQQQQQQQ	-/QQQQQQQ	1735	-	ENST00000268489	3704.0	10
37	Very high	BRCA	c.5218_5223dupCAACAA	InFrameInsertion	957	predicted	TIER 2	9	chr16:g.72831382_72831387dupTTGTTG	chr16:g.72831357C>CTTGTTG	ZFHX3	LoF	p.Q1740_Q1741dupQQ	-/QQ	1740	-	ENST00000268489	3704.0	10
37	Very high	BRCA	c.5244_5249delCCAGGC	InFrameDeletion	948	predicted	TIER 2	9	chr16:g.72831341_72831346delTGGGCC	chr16:g.72831331AGCCTGG>A	ZFHX3	LoF	p.A1750_Q1751delAQ	AQ/-	1750	-	ENST00000268489	3704.0	10
37	Very high	BRCA	c.5244_5249dupCCAGGC	InFrameInsertion	947	predicted	TIER 2	9	chr16:g.72831341_72831346dupTGGGCC	chr16:g.72831331A>AGCCTGG	ZFHX3	LoF	p.A1750_Q1751dupAQ	-/AQ	1750	-	ENST00000268489	3704.0	10
37	Very high	BRCA	c.5560_5565delCAGCAG	InFrameDeletion	852	predicted	TIER 2	9	chr16:g.72831023_72831028delTGCTGC	chr16:g.72831015TCTGCTG>T	ZFHX3	LoF	p.Q1854_Q1855delQQ	QQ/-	1854	-	ENST00000268489	3704.0	10
36	Very high	BRCA	c.1585_1587delCAG	InFrameDeletion	4699	predicted	TIER 2	3	chr1:g.27057877_27057879delCAG	chr1:g.27057873TCAG>T	ARID1A	LoF	p.Q529delQ	Q/-	529	+	ENST00000324856	2286.0	20
36	Very high	BRCA	c.57_62dupGCCGCC	InFrameInsertion	4333	predicted	TIER 2	1	chr1:g.27022951_27022956dupGCCGCC	chr1:g.27022939C>CCCGCCG	ARID1A	LoF	p.P20_P21dupPP	-/PP	20	+	ENST00000324856	2286.0	20
36	Very high	BRCA	c.60_62dupGCC	InFrameInsertion	4332	predicted	TIER 2	1	chr1:g.27022954_27022956dupGCC	chr1:g.27022939C>CCCG	ARID1A	LoF	p.P21dupP	-/P	21	+	ENST00000324856	2286.0	20
36	Very high	BRCA	c.5623C>T	Nonsense	3658	known	TIER 1	37	chr11:g.108175528C>T	chr11:g.108175528C>T	ATM	LoF	p.R1875*	R/*	1875	+	ENST00000278616	3057.0	63
36	Very high	BRCA	c.3372C>G	Nonsense	2687	known	TIER 1	23	chr11:g.108150305C>G	chr11:g.108150305C>G	ATM	LoF	p.Y1124*	Y/*	1124	+	ENST00000278616	3057.0	63
36	Very high	BRCA	c.802C>T	Nonsense	1412	known	TIER 1	7	chr11:g.108115654C>T	chr11:g.108115654C>T	ATM	LoF	p.Q268*	Q/*	268	+	ENST00000278616	3057.0	63
36	Very high	BRCA	c.748C>T	Nonsense	1402	known	TIER 1	7	chr11:g.108115600C>T	chr11:g.108115600C>T	ATM	LoF	p.R250*	R/*	250	+	ENST00000278616	3057.0	63
36	Very high	BRCA	c.283C>T	Nonsense	1150	known	TIER 1	4	chr11:g.108100002C>T	chr11:g.108100002C>T	ATM	LoF	p.Q95*	Q/*	95	+	ENST00000278616	3057.0	63
36	Very high	BRCA	c.4048C>T	Nonsense	803	predicted	TIER 1	13	chr20:g.31024563C>T	chr20:g.31024563C>T	ASXL1	LoF	p.Q1350*	Q/*	1350	+	ENST00000375687	1542.0	13
36	Very high	BRCA	c.3880delC	Frameshift	750	predicted	TIER 1	13	chr20:g.31024395delC	chr20:g.31024394TC>T	ASXL1	LoF	p.Q1294Rfs*156	Q/.	1294	+	ENST00000375687	1542.0	13
36	Very high	BRCA	c.2179G>T	Nonsense	237	predicted	TIER 1	13	chr20:g.31022694G>T	chr20:g.31022694G>T	ASXL1	LoF	p.E727*	E/*	727	+	ENST00000375687	1542.0	13
36	Very high	BRCA	c.1896C>A	Nonsense	137	predicted	TIER 1	13	chr20:g.31022411C>A	chr20:g.31022411C>A	ASXL1	LoF	p.C632*	C/*	632	+	ENST00000375687	1542.0	13
36	Very high	BRCA	c.1564C>T	Nonsense	9	predicted	TIER 1	12	chr20:g.31021565C>T	chr20:g.31021565C>T	ASXL1	LoF	p.Q522*	Q/*	522	+	ENST00000375687	1542.0	13
36	Very high	BRCA	c.7542T>G	Nonsense	4547	predicted	TIER 1	51	chr11:g.108202197T>G	chr11:g.108202197T>G	ATM	LoF	p.Y2514*	Y/*	2514	+	ENST00000278616	3057.0	63
36	Very high	BRCA	c.6100C>T	Nonsense	3898	predicted	TIER 1	42	chr11:g.108186742C>T	chr11:g.108186742C>T	ATM	LoF	p.R2034*	R/*	2034	+	ENST00000278616	3057.0	63
36	Very high	BRCA	c.5632_5635delTCGC	Frameshift	3663	predicted	TIER 1	37	chr11:g.108175537_108175540delTCGC	chr11:g.108175535TCTCG>T	ATM	LoF	p.S1878Kfs*38	S/.	1878	+	ENST00000278616	3057.0	63
36	Very high	BRCA	c.5290delC	Frameshift	3526	predicted	TIER 1	35	chr11:g.108172487delC	chr11:g.108172486TC>T	ATM	LoF	p.L1764Yfs*12	L/.	1764	+	ENST00000278616	3057.0	63
36	Very high	BRCA	c.4176T>A	Nonsense	3022	predicted	TIER 1	28	chr11:g.108159770T>A	chr11:g.108159770T>A	ATM	LoF	p.Y1392*	Y/*	1392	+	ENST00000278616	3057.0	63
36	Very high	BRCA	c.4106C>A	Nonsense	2980	predicted	TIER 1	27	chr11:g.108158439C>A	chr11:g.108158439C>A	ATM	LoF	p.S1369*	S/*	1369	+	ENST00000278616	3057.0	63
36	Very high	BRCA	c.3214G>T	Nonsense	2597	predicted	TIER 1	22	chr11:g.108143509G>T	chr11:g.108143509G>T	ATM	LoF	p.E1072*	E/*	1072	+	ENST00000278616	3057.0	63
36	Very high	BRCA	c.2840dupA	Nonsense	2407	predicted	TIER 1	19	chr11:g.108141792dupA	chr11:g.108141791T>TA	ATM	LoF	p.Y947*fs*1	Y/.	947	+	ENST00000278616	3057.0	63
36	Very high	BRCA	c.2734C>T	Nonsense	2338	predicted	TIER 1	18	chr11:g.108139232C>T	chr11:g.108139232C>T	ATM	LoF	p.Q912*	Q/*	912	+	ENST00000278616	3057.0	63
36	Very high	BRCA	c.2012_2013dupTA	Nonsense	1924	predicted	TIER 1	13	chr11:g.108124654_108124655dupTA	chr11:g.108124651G>GTA	ATM	LoF	p.E672*fs*1	E/.	672	+	ENST00000278616	3057.0	63
36	Very high	BRCA	c.1741_1742delTT	Frameshift	1799	predicted	TIER 1	11	chr11:g.108122697_108122698delTT	chr11:g.108122696CTT>C	ATM	LoF	p.L581Ifs*7	L/.	581	+	ENST00000278616	3057.0	63
36	Very high	BRCA	c.1402_1403delAA	Frameshift	1677	predicted	TIER 1	10	chr11:g.108121594_108121595delAA	chr11:g.108121593CAA>C	ATM	LoF	p.K468Efs*18	K/.	468	+	ENST00000278616	3057.0	63
36	Very high	BRCA	c.824delT	Frameshift	1417	predicted	TIER 1	7	chr11:g.108115676delT	chr11:g.108115673CT>C	ATM	LoF	p.L275*fs*1	L/.	275	+	ENST00000278616	3057.0	63
36	Very high	BRCA	c.695_699delTCTTA	Frameshift	1380	predicted	TIER 1	7	chr11:g.108115547_108115551delTCTTA	chr11:g.108115544ATATCT>A	ATM	LoF	p.I232Sfs*20	I/.	232	+	ENST00000278616	3057.0	63
36	Very high	BRCA	c.538C>T	Nonsense	1305	predicted	TIER 1	6	chr11:g.108114721C>T	chr11:g.108114721C>T	ATM	LoF	p.Q180*	Q/*	180	+	ENST00000278616	3057.0	63
36	Very high	BRCA	c.392C>G	Nonsense	1232	predicted	TIER 1	5	chr11:g.108106457C>G	chr11:g.108106457C>G	ATM	LoF	p.S131*	S/*	131	+	ENST00000278616	3057.0	63
36	Very high	BRCA	c.362T>A	Nonsense	1220	predicted	TIER 1	5	chr11:g.108106427T>A	chr11:g.108106427T>A	ATM	LoF	p.L121*	L/*	121	+	ENST00000278616	3057.0	63
36	Very high	BRCA	c.3967C>T	Nonsense	3455	known	TIER 1	10	chr17:g.41243581G>A	chr17:g.41243581G>A	BRCA1	LoF	p.Q1323*	Q/*	1323	-	ENST00000357654	1864.0	23
36	Very high	BRCA	c.145G>T	Nonsense	4943	known	TIER 1	3	chr13:g.32893291G>T	chr13:g.32893291G>T	BRCA2	LoF	p.E49*	E/*	49	+	ENST00000380152	3419.0	27
36	Very high	BRCA	c.1203T>G	Nonsense	850	predicted	TIER 1	12	chr3:g.52438516A>C	chr3:g.52438516A>C	BAP1	LoF	p.Y401*	Y/*	401	-	ENST00000460680	730.0	17
36	Very high	BRCA	c.1216_1227delGAGGATGACGTG	InFrameDeletion	832	predicted	TIER 2	12	chr3:g.52438493_52438504delACGTCATCCTCC	chr3:g.52438491GCACGTCATCCTC>G	BAP1	LoF	p.E406_V409delEDDV	EDDV/-	406	-	ENST00000460680	730.0	17
36	Very high	BRCA	c.815_824dupAGCCATGTGG	Frameshift	4294	predicted	TIER 1	10	chr17:g.41246731_41246740dupGCTCCACATG	chr17:g.41246723G>GCCACATGGCT	BRCA1	LoF	p.T276Afs*14	T/.	276	-	ENST00000357654	1864.0	23
36	Very high	BRCA	c.895_896delGT	Frameshift	4272	predicted	TIER 1	10	chr17:g.41246653_41246654delCA	chr17:g.41246651TAC>T	BRCA1	LoF	p.V299Rfs*4	V/.	299	-	ENST00000357654	1864.0	23
36	Very high	BRCA	c.1504_1508delTTAAA	Frameshift	4120	predicted	TIER 1	10	chr17:g.41246044_41246048delATTTA	chr17:g.41246039CTTTAA>C	BRCA1	LoF	p.L502Afs*2	L/.	502	-	ENST00000357654	1864.0	23
36	Very high	BRCA	c.1499_1508dupATAAATTAAA	Nonsense	4119	predicted	TIER 1	10	chr17:g.41246042_41246051dupTAATTTATTT	chr17:g.41246039C>CTTTAATTTAT	BRCA1	LoF	p.R504*fs*1	R/.	504	-	ENST00000357654	1864.0	23
36	Very high	BRCA	c.1799_1807dupTCCACAATT	InFrameInsertion	4041	predicted	TIER 2	10	chr17:g.41245741_41245749dupAATTGTGGA	chr17:g.41245740G>GAATTGTGGA	BRCA1	LoF	p.N602_S603insFHN	-/FHN	602	-	ENST00000357654	1864.0	23
36	Very high	BRCA	c.3141_3161delAGGTTCCAGTACTAATGAAGT	InFrameDeletion	3676	predicted	TIER 2	10	chr17:g.41244396_41244416delGTACTGGAACCTACTTCATTA	chr17:g.41244386CACTTCATTAGTACTGGAACCT>C	BRCA1	LoF	p.T1051_S1057delTNEVGSS	TNEVGSS/-	1051	-	ENST00000357654	1864.0	23
36	Very high	BRCA	c.3477_3480delAAAG	Frameshift	3595	predicted	TIER 1	10	chr17:g.41244068_41244071delCTTT	chr17:g.41244067CCTTT>C	BRCA1	LoF	p.I1159Mfs*50	I/.	1159	-	ENST00000357654	1864.0	23
36	Very high	BRCA	c.3770_3771delAG	Frameshift	3499	predicted	TIER 1	10	chr17:g.41243779_41243780delCT	chr17:g.41243776CCT>C	BRCA1	LoF	p.E1257Gfs*9	E/.	1257	-	ENST00000357654	1864.0	23
36	Very high	BRCA	c.3858_3861delTGAG	Frameshift	3476	predicted	TIER 1	10	chr17:g.41243689_41243692delCACT	chr17:g.41243686CCTCA>C	BRCA1	LoF	p.S1286Rfs*20	S/.	1286	-	ENST00000357654	1864.0	23
36	Very high	BRCA	c.4065_4068delTCAA	Frameshift	3425	predicted	TIER 1	10	chr17:g.41243482_41243485delGATT	chr17:g.41243479CTTGA>C	BRCA1	LoF	p.N1355Kfs*10	N/.	1355	-	ENST00000357654	1864.0	23
36	Very high	BRCA	c.5177_5180delGAAA	Frameshift	2852	predicted	TIER 1	18	chr17:g.41215370_41215373delCTTT	chr17:g.41215362TTTTC>T	BRCA1	LoF	p.R1726Kfs*3	R/.	1726	-	ENST00000357654	1864.0	23
36	Very high	BRCA	c.133G>T	Nonsense	4940	predicted	TIER 1	3	chr13:g.32893279G>T	chr13:g.32893279G>T	BRCA2	LoF	p.E45*	E/*	45	+	ENST00000380152	3419.0	27
36	Very high	BRCA	c.44_45insATT	InFrameInsertion	4876	predicted	TIER 2	2	chr13:g.32890641_32890642insATT	chr13:g.32890639T>TTTA	BRCA2	LoF	p.I14_F15insL	-/L	14	+	ENST00000380152	3419.0	27
36	Very high	BRCA	c.9924C>G	Nonsense	3488	known	passenger	27	chr13:g.32972574C>G	chr13:g.32972574C>G	BRCA2	LoF	p.Y3308*	Y/*	3308	+	ENST00000380152	3419.0	27
36	Very high	BRCA	c.9294C>G	Nonsense	3217	known	TIER 1	25	chr13:g.32968863C>G	chr13:g.32968863C>G	BRCA2	LoF	p.Y3098*	Y/*	3098	+	ENST00000380152	3419.0	27
36	Very high	BRCA	c.5773C>T	Nonsense	1770	known	TIER 1	11	chr13:g.32914265C>T	chr13:g.32914265C>T	BRCA2	LoF	p.Q1925*	Q/*	1925	+	ENST00000380152	3419.0	27
36	Very high	BRCA	c.5645C>A	Nonsense	1718	known	TIER 1	11	chr13:g.32914137C>A	chr13:g.32914137C>A	BRCA2	LoF	p.S1882*	S/*	1882	+	ENST00000380152	3419.0	27
36	Very high	BRCA	c.3922G>T	Nonsense	1204	known	TIER 1	11	chr13:g.32912414G>T	chr13:g.32912414G>T	BRCA2	LoF	p.E1308*	E/*	1308	+	ENST00000380152	3419.0	27
36	Very high	BRCA	c.3436G>T	Nonsense	1069	known	TIER 1	11	chr13:g.32911928G>T	chr13:g.32911928G>T	BRCA2	LoF	p.E1146*	E/*	1146	+	ENST00000380152	3419.0	27
36	Very high	BRCA	c.2612C>A	Nonsense	835	known	TIER 1	11	chr13:g.32911104C>A	chr13:g.32911104C>A	BRCA2	LoF	p.S871*	S/*	871	+	ENST00000380152	3419.0	27
36	Very high	BRCA	c.8869C>T	Nonsense	3023	predicted	TIER 1	22	chr13:g.32953568C>T	chr13:g.32953568C>T	BRCA2	LoF	p.Q2957*	Q/*	2957	+	ENST00000380152	3419.0	27
36	Very high	BRCA	c.6591_6592delTG	Frameshift	2035	predicted	TIER 1	11	chr13:g.32915083_32915084delTG	chr13:g.32915082CTG>C	BRCA2	LoF	p.E2198Nfs*4	E/.	2198	+	ENST00000380152	3419.0	27
36	Very high	BRCA	c.6485_6486delAA	Frameshift	2004	predicted	TIER 1	11	chr13:g.32914977_32914978delAA	chr13:g.32914975CAA>C	BRCA2	LoF	p.K2162Tfs*13	K/.	2162	+	ENST00000380152	3419.0	27
36	Very high	BRCA	c.6486_6489delACAA	Frameshift	2003	predicted	TIER 1	11	chr13:g.32914978_32914981delACAA	chr13:g.32914973GACAA>G	BRCA2	LoF	p.K2162Nfs*5	K/.	2162	+	ENST00000380152	3419.0	27
36	Very high	BRCA	c.6024dupG	Frameshift	1856	predicted	TIER 1	11	chr13:g.32914516dupG	chr13:g.32914515A>AG	BRCA2	LoF	p.Q2009Afs*9	Q/.	2009	+	ENST00000380152	3419.0	27
36	Very high	BRCA	c.5819_5824delAGAAAG	InFrameDeletion	1789	predicted	TIER 2	11	chr13:g.32914311_32914316delAGAAAG	chr13:g.32914309GGAGAAA>G	BRCA2	LoF	p.E1940_K1941delEK	EK/-	1940	+	ENST00000380152	3419.0	27
36	Very high	BRCA	c.5028_5030delTAG	InFrameDeletion	1531	predicted	TIER 2	11	chr13:g.32913520_32913522delTAG	chr13:g.32913515TGTA>T	BRCA2	LoF	p.S1676delS	S/-	1676	+	ENST00000380152	3419.0	27
36	Very high	BRCA	c.4478_4481delAAAG	Frameshift	1355	predicted	TIER 1	11	chr13:g.32912970_32912973delAAAG	chr13:g.32912964TGAAA>T	BRCA2	LoF	p.E1493Vfs*10	E/.	1493	+	ENST00000380152	3419.0	27
36	Very high	BRCA	c.4398_4402delACATT	Frameshift	1327	predicted	TIER 1	11	chr13:g.32912890_32912894delACATT	chr13:g.32912886AATTAC>A	BRCA2	LoF	p.L1466Ffs*2	L/.	1466	+	ENST00000380152	3419.0	27
36	Very high	BRCA	c.4284dupT	Frameshift	1296	predicted	TIER 1	11	chr13:g.32912776dupT	chr13:g.32912770A>AT	BRCA2	LoF	p.Q1429Sfs*9	Q/.	1429	+	ENST00000380152	3419.0	27
36	Very high	BRCA	c.4256_4257delAA	Frameshift	1286	predicted	TIER 1	11	chr13:g.32912748_32912749delAA	chr13:g.32912745TAA>T	BRCA2	LoF	p.K1419Rfs*3	K/.	1419	+	ENST00000380152	3419.0	27
36	Very high	BRCA	c.3871C>T	Nonsense	1193	predicted	TIER 1	11	chr13:g.32912363C>T	chr13:g.32912363C>T	BRCA2	LoF	p.Q1291*	Q/*	1291	+	ENST00000380152	3419.0	27
36	Very high	BRCA	c.3071_3073delTTA	InFrameDeletion	962	predicted	TIER 2	11	chr13:g.32911563_32911565delTTA	chr13:g.32911561CATT>C	BRCA2	LoF	p.I1024delI	I/-	1024	+	ENST00000380152	3419.0	27
36	Very high	BRCA	c.3069_3074delCATTAA	InFrameDeletion	960	predicted	TIER 2	11	chr13:g.32911561_32911566delCATTAA	chr13:g.32911557ATAACAT>A	BRCA2	LoF	p.N1023_I1024delNI	NI/-	1023	+	ENST00000380152	3419.0	27
36	Very high	BRCA	c.2808_2811delACAA	Frameshift	879	predicted	TIER 1	11	chr13:g.32911300_32911303delACAA	chr13:g.32911297TAAAC>T	BRCA2	LoF	p.A938Pfs*21	A/.	938	+	ENST00000380152	3419.0	27
36	Very high	BRCA	c.1796_1800delCTTAT	Frameshift	587	predicted	TIER 1	10	chr13:g.32907411_32907415delCTTAT	chr13:g.32907408CATCTT>C	BRCA2	LoF	p.S599*fs*1	S/.	599	+	ENST00000380152	3419.0	27
36	Very high	BRCA	c.1645_1647delAAG	InFrameDeletion	541	predicted	TIER 2	10	chr13:g.32907260_32907262delAAG	chr13:g.32907257CAGA>C	BRCA2	LoF	p.K549delK	K/-	549	+	ENST00000380152	3419.0	27
36	Very high	BRCA	c.644_646delAAG	InFrameDeletion	215	predicted	TIER 2	8	chr13:g.32903592_32903594delAAG	chr13:g.32903587TGAA>T	BRCA2	LoF	p.E215delE	E/-	215	+	ENST00000380152	3419.0	27
36	Very high	BRCA	c.445_446delGC	Frameshift	4583	predicted	TIER 1	1	chr12:g.12871218_12871219delGC	chr12:g.12871215TGC>T	CDKN1B	LoF	p.A149Rfs*56	A/.	149	+	ENST00000228872	199.0	3
36	Very high	BRCA	c.13C>T	Nonsense	4375	predicted	TIER 1	1	chr12:g.12870786C>T	chr12:g.12870786C>T	CDKN1B	LoF	p.R5*	R/*	5	+	ENST00000228872	199.0	3
36	Very high	BRCA	c.191_209delTGCTCCACGGCGCGGAGCC	Frameshift	34	predicted	TIER 1	2	chr9:g.21971150_21971168delGCTCCGCGCCGTGGAGCAG	chr9:g.21971148GGGCTCCGCGCCGTGGAGCA>G	CDKN2A	LoF	p.L64Pfs*76	L/.	64	-	ENST00000304494	157.0	3
36	Very high	BRCA	c.2773_2778delCAGGTG	InFrameDeletion	3864	predicted	TIER 2	14	chr16:g.3820673_3820678delCACCTG	chr16:g.3820672TCACCTG>T	CREBBP	LoF	p.Q925_V926delQV	QV/-	925	-	ENST00000262367	2443.0	31
36	Very high	BRCA	c.2351_2356delAGCCTC	InFrameDeletion	4931	predicted	TIER 2	15	chr2:g.46609627_46609632delAGCCTC	chr2:g.46609625ACAGCCT>A	EPAS1	ambiguous	p.Q784_P785delQP	QP/-	784	+	ENST00000263734	871.0	16
36	Very high	BRCA	c.1470_1472dupATC	InFrameInsertion	4431	predicted	TIER 2	11	chr2:g.46605822_46605824dupATC	chr2:g.46605820A>ACAT	EPAS1	ambiguous	p.S491dupS	-/S	491	+	ENST00000263734	871.0	16
36	Very high	BRCA	c.11846_11847delAT	Frameshift	4966	predicted	TIER 1	22	chr4:g.187521309_187521310delTA	chr4:g.187521307CAT>C	FAT1	LoF	p.Y3949Cfs*22	Y/.	3949	-	ENST00000441802	4589.0	27
36	Very high	BRCA	c.139C>T	Nonsense	2294	predicted	TIER 1	2	chr2:g.212989572G>A	chr2:g.212989572G>A	ERBB4	LoF	p.R47*	R/*	47	-	ENST00000342788	1309.0	28
36	Very high	BRCA	c.37C>T	Nonsense	4254	predicted	TIER 1	2	chr4:g.153332919G>A	chr4:g.153332919G>A	FBXW7	LoF	p.R13*	R/*	13	-	ENST00000281708	708.0	12
36	Very high	BRCA	c.40_42delCGA	InFrameDeletion	4251	predicted	TIER 2	2	chr4:g.153332919_153332921delGTC	chr4:g.153332913TTCG>T	FBXW7	LoF	p.R14delR	R/-	14	-	ENST00000281708	708.0	12
36	Very high	BRCA	c.336_341delTGAGGA	InFrameDeletion	4174	predicted	TIER 2	2	chr4:g.153332620_153332625delATCCTC	chr4:g.153332614CTCCTCA>C	FBXW7	LoF	p.D112_E113delDE	DE/-	112	-	ENST00000281708	708.0	12
36	Very high	BRCA	c.343_351delGAGGAGGAG	InFrameDeletion	4172	predicted	TIER 2	2	chr4:g.153332611_153332619delCTCCTCCTC	chr4:g.153332604TCTCCTCCTC>T	FBXW7	LoF	p.E115_E117delEEE	EEE/-	115	-	ENST00000281708	708.0	12
36	Very high	BRCA	c.349_351delGAG	InFrameDeletion	4171	predicted	TIER 2	2	chr4:g.153332617_153332619delCTC	chr4:g.153332604TCTC>T	FBXW7	LoF	p.E117delE	E/-	117	-	ENST00000281708	708.0	12
36	Very high	BRCA	c.349_351dupGAG	InFrameInsertion	4170	predicted	TIER 2	2	chr4:g.153332617_153332619dupCTC	chr4:g.153332604T>TCTC	FBXW7	LoF	p.E117dupE	-/E	117	-	ENST00000281708	708.0	12
36	Very high	BRCA	c.14034T>A	Nonsense	3126	predicted	TIER 1	17	chr4:g.126412011T>A	chr4:g.126412011T>A	FAT4	LoF	p.Y4678*	Y/*	4678	+	ENST00000394329	4982.0	17
36	Very high	BRCA	c.6006_6007insATAAAAGCC	InFrameInsertion	660	predicted	TIER 2	5	chr4:g.126336124_126336125insATAAAAGCC	chr4:g.126336123T>TCATAAAAGC	FAT4	LoF	p.V2002_L2003insIKA	-/IKA	2002	+	ENST00000394329	4982.0	17
36	Very high	BRCA	c.355C>T	Nonsense	990	predicted	TIER 1	2	chr14:g.38061634G>A	chr14:g.38061634G>A	FOXA1	LoF	p.Q119*	Q/*	119	-	ENST00000250448	473.0	2
36	Very high	BRCA	c.411C>A	Nonsense	970	predicted	TIER 1	2	chr14:g.38061578G>T	chr14:g.38061578G>T	FOXA1	LoF	p.C137*	C/*	137	-	ENST00000250448	473.0	2
36	Very high	BRCA	c.1286dupA	Nonsense	730	predicted	TIER 1	2	chr14:g.38060703dupT	chr14:g.38060702G>GT	FOXA1	LoF	p.Y429*fs*1	Y/.	429	-	ENST00000250448	473.0	2
36	Very high	BRCA	c.419_421dupCCT	InFrameInsertion	1743	predicted	TIER 2	3	chr10:g.8100445_8100447dupCCT	chr10:g.8100437G>GTCC	GATA3	LoF	p.S140dupS	-/S	140	+	ENST00000379328	445.0	6
36	Very high	BRCA	c.1625_1627delAGC	InFrameDeletion	2630	predicted	TIER 2	16	chrX:g.44922764_44922766delAGC	chrX:g.44922759CCAG>C	KDM6A	LoF	p.Q542delQ	Q/-	542	+	ENST00000377967	1402.0	29
36	Very high	BRCA	c.14073C>A	Nonsense	4300	predicted	TIER 1	54	chr7:g.151842339G>T	chr7:g.151842339G>T	MLL3	LoF	p.Y4691*	Y/*	4691	-	ENST00000262189	4912.0	59
36	Very high	BRCA	c.11347C>T	Nonsense	1888	predicted	TIER 1	74	chr2:g.141115596G>A	chr2:g.141115596G>A	LRP1B	LoF	p.R3783*	R/*	3783	-	ENST00000389484	4600.0	91
36	Very high	BRCA	c.829C>T	Nonsense	54	predicted	TIER 1	6	chr12:g.49447269G>A	chr12:g.49447269G>A	MLL2	LoF	p.Q277*	Q/*	277	-	ENST00000301067	5538.0	54
36	Very high	BRCA	c.223C>T	Nonsense	4655	known	passenger	4	chr14:g.65544703G>A	chr14:g.65544703G>A	MAX	Act	p.R75*	R/*	75	-	ENST00000358664	161.0	5
36	Very high	BRCA	c.4014T>G	Nonsense	4176	predicted	TIER 1	17	chr5:g.56181790T>G	chr5:g.56181790T>G	MAP3K1	LoF	p.Y1338*	Y/*	1338	+	ENST00000399503	1513.0	20
36	Very high	BRCA	c.142C>T	Nonsense	2089	predicted	TIER 1	2	chr2:g.142567911G>A	chr2:g.142567911G>A	LRP1B	LoF	p.Q48*	Q/*	48	-	ENST00000389484	4600.0	91
36	Very high	BRCA	c.1378C>T	Nonsense	1522	predicted	TIER 1	9	chr2:g.141816482G>A	chr2:g.141816482G>A	LRP1B	LoF	p.R460*	R/*	460	-	ENST00000389484	4600.0	91
36	Very high	BRCA	c.1686_1697delCTTTCACGCAGA	InFrameDeletion	1360	predicted	TIER 2	11	chr2:g.141806650_141806661delGCGTGAAAGTCT	chr2:g.141806646TTCTGCGTGAAAG>T	LRP1B	LoF	p.D562_A565delDFHA	DFHA/-	562	-	ENST00000389484	4600.0	91
36	Very high	BRCA	c.910C>T	Nonsense	3348	known	TIER 1	9	chr17:g.29527461C>T	chr17:g.29527461C>T	NF1	LoF	p.R304*	R/*	304	+	ENST00000358273	2840.0	58
36	Very high	BRCA	c.574C>T	Nonsense	3174	known	TIER 1	5	chr17:g.29497003C>T	chr17:g.29497003C>T	NF1	LoF	p.R192*	R/*	192	+	ENST00000358273	2840.0	58
36	Very high	BRCA	c.246_247delTC	Frameshift	3075	predicted	TIER 1	3	chr17:g.29486069_29486070delTC	chr17:g.29486062ATC>A	NF1	LoF	p.Q83Vfs*23	Q/.	83	+	ENST00000358273	2840.0	58
36	Very high	BRCA	c.97A>T	Nonsense	3014	predicted	TIER 1	2	chr17:g.29483037A>T	chr17:g.29483037A>T	NF1	LoF	p.K33*	K/*	33	+	ENST00000358273	2840.0	58
36	Very high	BRCA	c.6576T>A	Nonsense	364	predicted	TIER 1	43	chr17:g.29664534T>A	chr17:g.29664534T>A	NF1	LoF	p.Y2192*	Y/*	2192	+	ENST00000358273	2840.0	58
36	Very high	BRCA	c.337C>T	Nonsense	1981	predicted	TIER 2	3	chr1:g.120548030G>A	chr1:g.120548030G>A	NOTCH2	ambiguous	p.R113*	R/*	113	-	ENST00000256646	2472.0	34
36	Very high	BRCA	c.386_387delAT	Frameshift	1966	predicted	TIER 2	3	chr1:g.120547981_120547982delTA	chr1:g.120547979CAT>C	NOTCH2	ambiguous	p.Y129*fs*1	Y/.	129	-	ENST00000256646	2472.0	34
36	Very high	BRCA	c.905dupG	Frameshift	1688	predicted	TIER 2	6	chr1:g.120512337dupC	chr1:g.120512336G>GC	NOTCH2	ambiguous	p.C302Wfs*33	C/.	302	-	ENST00000256646	2472.0	34
36	Very high	BRCA	c.10C>T	Nonsense	3205	predicted	TIER 2	2	chr3:g.178916623C>T	chr3:g.178916623C>T	PIK3CA	Act	p.R4*	R/*	4	+	ENST00000263967	1069.0	21
36	Very high	BRCA	c.5027C>G	Nonsense	2682	predicted	TIER 2	31	chr4:g.87692532C>G	chr4:g.87692532C>G	PTPN13	ambiguous	p.S1676*	S/*	1676	+	ENST00000436978	2491.0	48
36	Very high	BRCA	c.4773C>A	Nonsense	2597	predicted	TIER 2	30	chr4:g.87691307C>A	chr4:g.87691307C>A	PTPN13	ambiguous	p.C1591*	C/*	1591	+	ENST00000436978	2491.0	48
36	Very high	BRCA	c.4015C>T	Nonsense	2298	predicted	TIER 2	24	chr4:g.87684341C>T	chr4:g.87684341C>T	PTPN13	ambiguous	p.Q1339*	Q/*	1339	+	ENST00000436978	2491.0	48
36	Very high	BRCA	c.3739C>T	Nonsense	2234	predicted	TIER 2	24	chr4:g.87684065C>T	chr4:g.87684065C>T	PTPN13	ambiguous	p.Q1247*	Q/*	1247	+	ENST00000436978	2491.0	48
36	Very high	BRCA	c.825C>G	Nonsense	965	predicted	TIER 2	7	chr4:g.87622584C>G	chr4:g.87622584C>G	PTPN13	ambiguous	p.Y275*	Y/*	275	+	ENST00000436978	2491.0	48
36	Very high	BRCA	c.667C>T	Nonsense	924	predicted	TIER 2	7	chr4:g.87622426C>T	chr4:g.87622426C>T	PTPN13	ambiguous	p.Q223*	Q/*	223	+	ENST00000436978	2491.0	48
36	Very high	BRCA	c.613C>T	Nonsense	879	predicted	TIER 2	6	chr4:g.87614806C>T	chr4:g.87614806C>T	PTPN13	ambiguous	p.R205*	R/*	205	+	ENST00000436978	2491.0	48
36	Very high	BRCA	c.750_751delTG	Frameshift	422	predicted	TIER 1	7	chr10:g.89717725_89717726delTG	chr10:g.89717718CTG>C	PTEN	LoF	p.C250Wfs*2	C/.	250	+	ENST00000371953	404.0	9
36	Very high	BRCA	c.50_51delAA	Frameshift	152	predicted	TIER 1	1	chr10:g.89624276_89624277delAA	chr10:g.89624275CAA>C	PTEN	LoF	p.Q17Rfs*26	Q/.	17	+	ENST00000371953	404.0	9
36	Very high	BRCA	c.82_84delTCT	InFrameDeletion	1274	predicted	TIER 2	3	chr21:g.36265237_36265239delAAG	chr21:g.36265234TAGA>T	RUNX1	ambiguous	p.S28delS	S/-	28	-	ENST00000437180	481.0	9
36	Very high	BRCA	c.10089_10097delCCAGCCTGC	InFrameDeletion	3627	predicted	TIER 2	12	chr1:g.16263720_16263728delCCAGCCTGC	chr1:g.16263711ACAGCCTGCC>A	SPEN	ambiguous	p.Q3364_A3366delQPA	QPA/-	3364	+	ENST00000375759	3665.0	15
36	Very high	BRCA	c.10070_10087dupTGCAGTCCACACAGCCTG	InFrameInsertion	3620	predicted	TIER 2	12	chr1:g.16263701_16263718dupTGCAGTCCACACAGCCTG	chr1:g.16263693T>TCAGCCTGTGCAGTCCACA	SPEN	ambiguous	p.V3357_P3362dupVQSTQP	-/VQSTQP	3357	+	ENST00000375759	3665.0	15
36	Very high	BRCA	c.6107_6109delAGG	InFrameDeletion	2478	predicted	TIER 2	11	chr1:g.16258842_16258844delAGG	chr1:g.16258834TGAG>T	SPEN	ambiguous	p.E2036delE	E/-	2036	+	ENST00000375759	3665.0	15
36	Very high	BRCA	c.2837C>A	Nonsense	1659	predicted	TIER 2	11	chr1:g.16255572C>A	chr1:g.16255572C>A	SPEN	ambiguous	p.S946*	S/*	946	+	ENST00000375759	3665.0	15
36	Very high	BRCA	c.2272C>T	Nonsense	1509	predicted	TIER 2	11	chr1:g.16255007C>T	chr1:g.16255007C>T	SPEN	ambiguous	p.R758*	R/*	758	+	ENST00000375759	3665.0	15
36	Very high	BRCA	c.828_830delTAG	InFrameDeletion	1009	predicted	TIER 2	3	chr1:g.16203120_16203122delTAG	chr1:g.16203117AAGT>A	SPEN	ambiguous	p.S276delS	S/-	276	+	ENST00000375759	3665.0	15
36	Very high	BRCA	c.565C>T	Nonsense	931	predicted	TIER 2	3	chr1:g.16202857C>T	chr1:g.16202857C>T	SPEN	ambiguous	p.R189*	R/*	189	+	ENST00000375759	3665.0	15
36	Very high	BRCA	c.167_177+1delCGGCCTATCCGG	SpliceDonorDeletion	26	predicted	TIER 2	1	chr12:g.50479319_50479330delCGGCCTATCCGG	chr12:g.50479317AGCGGCCTATCCG>A	SMARCD1	ambiguous	.	./.	.	+	ENST00000394963	516.0	13
36	Very high	BRCA	c.795_796insGTCCTTTAT	InFrameInsertion	4528	predicted	TIER 2	4	chr12:g.115117382_115117383insAGGACATAA	chr12:g.115117378T>TATAAAGGAC	TBX3	LoF	p.Y265_S266insVLY	-/VLY	265	-	ENST00000257566	744.0	8
36	Very high	BRCA	c.928C>T	Nonsense	4482	predicted	TIER 1	5	chr12:g.115115398G>A	chr12:g.115115398G>A	TBX3	LoF	p.R310*	R/*	310	-	ENST00000257566	744.0	8
36	Very high	BRCA	c.940A>T	Nonsense	4480	predicted	TIER 1	5	chr12:g.115115386T>A	chr12:g.115115386T>A	TBX3	LoF	p.R314*	R/*	314	-	ENST00000257566	744.0	8
36	Very high	BRCA	c.586C>T	Nonsense	303	known	TIER 1	6	chr17:g.7578263G>A	chr17:g.7578263G>A	TP53	LoF	p.R196*	R/*	196	-	ENST00000269305	394.0	11
36	Very high	BRCA	c.9588_9589insAG	Frameshift	4638	predicted	TIER 1	10	chr16:g.72822586_72822587insCT	chr16:g.72822586G>GCT	ZFHX3	LoF	p.Q3197Sfs*45	Q/.	3197	-	ENST00000268489	3704.0	10
36	Very high	BRCA	c.9950_9952delCTT	MultiAAMissense	4463	predicted	TIER 1	10	chr16:g.72822223_72822225delAAG	chr16:g.72822222TAAG>T	ZFHX3	LoF	p.P3317_Y3318delinsH	insH/-	3317	-	ENST00000268489	3704.0	10
36	Very high	BRCA	c.9955_9957delTAT	InFrameDeletion	4460	predicted	TIER 2	10	chr16:g.72822222_72822224delTAA	chr16:g.72822217CATA>C	ZFHX3	LoF	p.Y3319delY	Y/-	3319	-	ENST00000268489	3704.0	10
36	Very high	BRCA	c.363_368dupACAGCA	InFrameInsertion	1733	predicted	TIER 2	1	chr6:g.157099426_157099431dupACAGCA	chr6:g.157099420G>GCAGCAA	ARID1B	LoF	p.Q130_Q131dupQQ	-/QQ	130	+	ENST00000346085	2250.0	20
36	Very high	BRCA	c.363_371delACAGCAGCA	InFrameDeletion	1731	predicted	TIER 2	1	chr6:g.157099426_157099434delACAGCAGCA	chr6:g.157099417GCAGCAGCAA>G	ARID1B	LoF	p.Q129_Q131delQQQ	QQQ/-	129	+	ENST00000346085	2250.0	20
36	Very high	BRCA	c.363_371dupACAGCAGCA	InFrameInsertion	1730	predicted	TIER 2	1	chr6:g.157099426_157099434dupACAGCAGCA	chr6:g.157099417G>GCAGCAGCAA	ARID1B	LoF	p.Q129_Q131dupQQQ	-/QQQ	129	+	ENST00000346085	2250.0	20
36	Very high	BRCA	c.363_374delACAGCAGCAGCA	InFrameDeletion	1727	predicted	TIER 2	1	chr6:g.157099426_157099437delACAGCAGCAGCA	chr6:g.157099414GCAGCAGCAGCAA>G	ARID1B	LoF	p.Q128_Q131delQQQQ	QQQQ/-	128	+	ENST00000346085	2250.0	20
36	Very high	BRCA	c.363_377delACAGCAGCAGCAGCA	InFrameDeletion	1724	predicted	TIER 2	1	chr6:g.157099426_157099440delACAGCAGCAGCAGCA	chr6:g.157099411GCAGCAGCAGCAGCAA>G	ARID1B	LoF	p.Q127_Q131delQQQQQ	QQQQQ/-	127	+	ENST00000346085	2250.0	20
36	Very high	BRCA	c.363_380delACAGCAGCAGCAGCAGCA	InFrameDeletion	1721	predicted	TIER 2	1	chr6:g.157099426_157099443delACAGCAGCAGCAGCAGCA	chr6:g.157099408GCAGCAGCAGCAGCAGCAA>G	ARID1B	LoF	p.Q126_Q131delQQQQQQ	QQQQQQ/-	126	+	ENST00000346085	2250.0	20
36	Very high	BRCA	c.363_383delACAGCAGCAGCAGCAGCAGCA	InFrameDeletion	1718	predicted	TIER 2	1	chr6:g.157099426_157099446delACAGCAGCAGCAGCAGCAGCA	chr6:g.157099405GCAGCAGCAGCAGCAGCAGCAA>G	ARID1B	LoF	p.Q125_Q131delQQQQQQQ	QQQQQQQ/-	125	+	ENST00000346085	2250.0	20
36	Very high	BRCA	c.369_392delGCAGCAGCAGCAGCAGCAACAGCA	InFrameDeletion	1714	predicted	TIER 2	1	chr6:g.157099432_157099455delGCAGCAGCAGCAGCAGCAACAGCA	chr6:g.157099402CCAGCAGCAGCAGCAGCAGCAGCAA>C	ARID1B	LoF	p.Q124_Q131delQQQQQQQQ	QQQQQQQQ/-	124	+	ENST00000346085	2250.0	20
36	Very high	BRCA	c.339_362delCCAGCAGCAGCAGCAGCAGCAGCA	MultiAAMissense	1707	predicted	TIER 1	1	chr6:g.157099402_157099425delCCAGCAGCAGCAGCAGCAGCAGCA	chr6:g.157099401TCCAGCAGCAGCAGCAGCAGCAGCA>T	ARID1B	LoF	p.F113_Q121delinsL	insL/-	113	+	ENST00000346085	2250.0	20
36	Very high	BRCA	c.329_355delTAAACCAGTTCCAGCAGCAGCAGCAGC	InFrameDeletion	1704	predicted	TIER 2	1	chr6:g.157099392_157099418delTAAACCAGTTCCAGCAGCAGCAGCAGC	chr6:g.157099381ACAGCAGCAGCTAAACCAGTTCCAGCAG>A	ARID1B	LoF	p.L110_Q118delLNQFQQQQQ	LNQFQQQQQ/-	110	+	ENST00000346085	2250.0	20
36	Very high	BRCA	c.288_308dupTGCCCACCACCTCCACCACCA	InFrameInsertion	1684	predicted	TIER 2	1	chr6:g.157099351_157099371dupTGCCCACCACCTCCACCACCA	chr6:g.157099341A>ACCACCACCATGCCCACCACCT	ARID1B	LoF	p.A97_H103dupAHHLHHH	-/AHHLHHH	97	+	ENST00000346085	2250.0	20
36	Very high	BRCA	c.278_298dupACCACCACCATGCCCACCACC	InFrameInsertion	1661	predicted	TIER 2	1	chr6:g.157099341_157099361dupACCACCACCATGCCCACCACC	chr6:g.157099312G>GCACCACCACCACCACCATGCC	ARID1B	LoF	p.H93_H99dupHHHHAHH	-/HHHHAHH	93	+	ENST00000346085	2250.0	20
36	Very high	BRCA	c.246_278delGCAGCACCACCACCACCACCATGCCCACCACCA	InFrameDeletion	1655	predicted	TIER 2	1	chr6:g.157099309_157099341delGCAGCACCACCACCACCACCATGCCCACCACCA	chr6:g.157099302CCCACCAGCAGCACCACCACCACCACCATGCCCA>C	ARID1B	LoF	p.Q82_H92delQQHHHHHHAHH	QQHHHHHHAHH/-	82	+	ENST00000346085	2250.0	20
36	Very high	BRCA	c.246_257delGCAGCACCACCA	InFrameDeletion	1654	predicted	TIER 2	1	chr6:g.157099309_157099320delGCAGCACCACCA	chr6:g.157099302CCCACCAGCAGCA>C	ARID1B	LoF	p.Q82_H85delQQHH	QQHH/-	82	+	ENST00000346085	2250.0	20
36	Very high	BRCA	c.153_155delCTC	InFrameDeletion	1623	predicted	TIER 2	1	chr6:g.157099216_157099218delCTC	chr6:g.157099210TTCC>T	ARID1B	LoF	p.S53delS	S/-	53	+	ENST00000346085	2250.0	20
36	Very high	BRCA	c.1281dupA	Frameshift	4915	predicted	TIER 1	12	chr20:g.31021282dupA	chr20:g.31021276C>CA	ASXL1	LoF	p.Q428Tfs*10	Q/.	428	+	ENST00000375687	1542.0	13
36	Very high	BRCA	c.1249C>T	Nonsense	4910	predicted	TIER 1	12	chr20:g.31021250C>T	chr20:g.31021250C>T	ASXL1	LoF	p.R417*	R/*	417	+	ENST00000375687	1542.0	13
36	Very high	BRCA	c.1204dupC	Frameshift	4896	predicted	TIER 1	12	chr20:g.31021205dupC	chr20:g.31021202A>AC	ASXL1	LoF	p.R402Pfs*8	R/.	402	+	ENST00000375687	1542.0	13
36	Very high	BRCA	c.1127_1132delGCCAGG	InFrameDeletion	4880	predicted	TIER 2	12	chr20:g.31021128_31021133delGCCAGG	chr20:g.31021125TGGGCCA>T	ASXL1	LoF	p.G376_Q377delGQ	GQ/-	376	+	ENST00000375687	1542.0	13
36	Very high	BRCA	c.1117C>T	Nonsense	4878	predicted	TIER 1	12	chr20:g.31021118C>T	chr20:g.31021118C>T	ASXL1	LoF	p.Q373*	Q/*	373	+	ENST00000375687	1542.0	13
36	Very high	BRCA	c.25_27delAAG	InFrameDeletion	4175	predicted	TIER 2	1	chr20:g.30946603_30946605delAAG	chr20:g.30946591CAGA>C	ASXL1	LoF	p.K9delK	K/-	9	+	ENST00000375687	1542.0	13
36	Very high	BRCA	c.2446_2448delAAT	InFrameDeletion	64	predicted	TIER 2	8	chr1:g.27089490_27089492delAAT	chr1:g.27089487TATA>T	ARID1A	LoF	p.N816delN	N/-	816	+	ENST00000324856	2286.0	20
36	Very high	BRCA	c.1882C>T	Nonsense	3585	predicted	TIER 1	2	chr4:g.187629100G>A	chr4:g.187629100G>A	FAT1	LoF	p.R628*	R/*	628	-	ENST00000441802	4589.0	27
36	Very high	BRCA	c.2736_2738delTGT	InFrameDeletion	3314	predicted	TIER 2	2	chr4:g.187628246_187628248delAAC	chr4:g.187628243CACA>C	FAT1	LoF	p.V913delV	V/-	913	-	ENST00000441802	4589.0	27
36	Very high	BRCA	c.2959C>T	Nonsense	3248	predicted	TIER 1	2	chr4:g.187628023G>A	chr4:g.187628023G>A	FAT1	LoF	p.Q987*	Q/*	987	-	ENST00000441802	4589.0	27
36	Very high	BRCA	c.5383C>T	Nonsense	2229	predicted	TIER 1	10	chr4:g.187542357G>A	chr4:g.187542357G>A	FAT1	LoF	p.R1795*	R/*	1795	-	ENST00000441802	4589.0	27
36	Very high	BRCA	c.8965delA	Frameshift	1153	predicted	TIER 1	11	chr4:g.187538274delT	chr4:g.187538268CT>C	FAT1	LoF	p.R2989Gfs*20	R/.	2989	-	ENST00000441802	4589.0	27
36	Very high	BRCA	c.1699C>T	Nonsense	4624	predicted	TIER 2	1	chr11:g.92086977C>T	chr11:g.92086977C>T	FAT3	ambiguous	p.R567*	R/*	567	+	ENST00000298047	4590.0	27
36	Very high	BRCA	c.1621G>T	Nonsense	4607	predicted	TIER 2	1	chr11:g.92086899G>T	chr11:g.92086899G>T	FAT3	ambiguous	p.E541*	E/*	541	+	ENST00000298047	4590.0	27
36	Very high	BRCA	c.6573T>A	Nonsense	1236	predicted	TIER 2	9	chr11:g.92532752T>A	chr11:g.92532752T>A	FAT3	ambiguous	p.Y2191*	Y/*	2191	+	ENST00000298047	4590.0	27
36	Very high	BRCA	c.3555C>G	Nonsense	188	predicted	TIER 2	2	chr11:g.92258062C>G	chr11:g.92258062C>G	FAT3	ambiguous	p.Y1185*	Y/*	1185	+	ENST00000298047	4590.0	27
36	Very high	BRCA	c.1411_1419delGGGAAGTGT	InFrameDeletion	3791	predicted	TIER 2	10	chr7:g.151949684_151949692delCTTCCCACA	chr7:g.151949680AACACTTCCC>A	MLL3	LoF	p.G471_C473delGKC	GKC/-	471	-	ENST00000262189	4912.0	59
36	Very high	BRCA	c.1420_1422dupTAT	InFrameInsertion	3789	predicted	TIER 2	10	chr7:g.151949679_151949681dupTAA	chr7:g.151949677G>GATA	MLL3	LoF	p.Y474dupY	-/Y	474	-	ENST00000262189	4912.0	59
36	Very high	BRCA	c.10468_10470delCAA	InFrameDeletion	557	predicted	TIER 2	43	chr7:g.151860196_151860198delTGT	chr7:g.151860191CTTG>C	MLL3	LoF	p.Q3490delQ	Q/-	3490	-	ENST00000262189	4912.0	59
36	Very high	BRCA	c.1959_1985delATCCCCCCTGCCTGTGGTGTCACGCCT	InFrameDeletion	4603	predicted	TIER 2	10	chr12:g.49445486_49445512delTGACACCACAGGCAGGGGGGATAGGCG	chr12:g.49445480CAGGCGTGACACCACAGGCAGGGGGGAT>C	MLL2	LoF	p.L656_P664delLPVVSRLSP	LPVVSRLSP/-	656	-	ENST00000301067	5538.0	54
36	Very high	BRCA	c.2264_2317delGGCCTGAGGAGCCACACCTATCTCCGCAGGCTGAGGAGCCACACCTGTCCCCCC	InFrameDeletion	4469	predicted	TIER 2	10	chr12:g.49445162_49445215delTGGCTCCTCAGCCTGCGGAGATAGGTGTGGCTCCTCAGGCCGGGGGGACAGGTG	chr12:g.49445148TGGGGGGACAGGTGTGGCTCCTCAGCCTGCGGAGATAGGTGTGGCTCCTCAGGCC>T	MLL2	LoF	p.R755_P772delRPEEPHLSPQAEEPHLSP	RPEEPHLSPQAEEPHLSP/-	755	-	ENST00000301067	5538.0	54
36	Very high	BRCA	c.2278_2331delCACCTATCTCCGCAGGCTGAGGAGCCACACCTGTCCCCCCAGCCTGAGGAGCCA	InFrameDeletion	4462	predicted	TIER 2	10	chr12:g.49445148_49445201delTGGGGGGACAGGTGTGGCTCCTCAGCCTGCGGAGATAGGTGTGGCTCCTCAGGC	chr12:g.49445134ATGGCTCCTCAGGCTGGGGGGACAGGTGTGGCTCCTCAGCCTGCGGAGATAGGTG>A	MLL2	LoF	p.H760_P777delHLSPQAEEPHLSPQPEEP	HLSPQAEEPHLSPQPEEP/-	760	-	ENST00000301067	5538.0	54
36	Very high	BRCA	c.2332_2358delTGCCTATGCGCTGTGCCTGAGGAGCCA	InFrameDeletion	4450	predicted	TIER 2	10	chr12:g.49445121_49445147delACAGCGCATAGGCATGGCTCCTCAGGC	chr12:g.49445107GTGGCTCCTCAGGCACAGCGCATAGGCA>G	MLL2	LoF	p.C778_P786delCLCAVPEEP	CLCAVPEEP/-	778	-	ENST00000301067	5538.0	54
36	Very high	BRCA	c.2354_2380dupAGCCACACTTGTCCCCCCAGGCTGAGG	InFrameInsertion	4440	predicted	TIER 2	10	chr12:g.49445092_49445118dupCCTGGGGGGACAAGTGTGGCTCCTCAG	chr12:g.49445085C>CCCTCAGCCTGGGGGGACAAGTGTGGCT	MLL2	LoF	p.E785_E793dupEPHLSPQAE	-/EPHLSPQAE	785	-	ENST00000301067	5538.0	54
36	Very high	BRCA	c.2470_2523delTTGTCCCCCCAACCTGAGGAATCACACCTGTCCCCCCAGTCTGAGGAGCCATGC	InFrameDeletion	4395	predicted	TIER 2	10	chr12:g.49444957_49445010delACTGGGGGGACAGGTGTGATTCCTCAGGTTGGGGGGACAAGCATGGCTCCTCAG	chr12:g.49444942GGCATGGCTCCTCAGACTGGGGGGACAGGTGTGATTCCTCAGGTTGGGGGGACAA>G	MLL2	LoF	p.Q827_P844delQPEESHLSPQSEEPCLSP	QPEESHLSPQSEEPCLSP/-	827	-	ENST00000301067	5538.0	54
36	Very high	BRCA	c.2507_2533dupAGTCTGAGGAGCCATGCCTGTCCCCCC	InFrameInsertion	4389	predicted	TIER 2	10	chr12:g.49444944_49444970dupCATGGCTCCTCAGACTGGGGGGACAGG	chr12:g.49444932C>CGGGGGGACAGGCATGGCTCCTCAGACT	MLL2	LoF	p.Q836_P844dupQSEEPCLSP	-/QSEEPCLSP	836	-	ENST00000301067	5538.0	54
36	Very high	BRCA	c.2694_2708delAGCCCTGTCTGAGCC	InFrameDeletion	4335	predicted	TIER 2	10	chr12:g.49444763_49444777delAGACAGGGCTGGCTC	chr12:g.49444757AGGCTCAGACAGGGCT>A	MLL2	LoF	p.A899_P903delALSEP	ALSEP/-	899	-	ENST00000301067	5538.0	54
36	Very high	BRCA	c.2737_2748delGAGGAGCTGCCG	InFrameDeletion	4322	predicted	TIER 2	10	chr12:g.49444718_49444729delCGGCAGCTCCTC	chr12:g.49444717ACGGCAGCTCCTC>A	MLL2	LoF	p.E913_P916delEELP	EELP/-	913	-	ENST00000301067	5538.0	54
36	Very high	BRCA	c.3062_3082dupCTCCTCAGTGTTCGCCACTCC	InFrameInsertion	4182	predicted	TIER 2	11	chr12:g.49444290_49444310dupGAGTGGCGAACACTGAGGAGG	chr12:g.49444288A>AGGAGTGGCGAACACTGAGGAG	MLL2	LoF	p.P1021_L1027dupPPQCSPL	-/PPQCSPL	1021	-	ENST00000301067	5538.0	54
36	Very high	BRCA	c.3328_3363delCCAGCCCTGGATGACTTCTCTGGCCTAGGGGAAGAC	InFrameDeletion	4100	predicted	TIER 2	11	chr12:g.49444009_49444044delTCTTCCCCTAGGCCAGAGAAGTCATCCAGGGCTGGG	chr12:g.49444007TGTCTTCCCCTAGGCCAGAGAAGTCATCCAGGGCTGG>T	MLL2	LoF	p.P1110_D1121delPALDDFSGLGED	PALDDFSGLGED/-	1110	-	ENST00000301067	5538.0	54
36	Very high	BRCA	c.3395_3397delGTT	MultiAAMissense	4081	predicted	TIER 1	11	chr12:g.49443974_49443976delAAC	chr12:g.49443973GAAC>G	MLL2	LoF	p.G1132_S1133delinsA	insA/-	1132	-	ENST00000301067	5538.0	54
36	Very high	BRCA	c.11217_11222dupGCAGCA	InFrameInsertion	1159	predicted	TIER 2	39	chr12:g.49427281_49427286dupTGCTGC	chr12:g.49427265T>TTGCTGC	MLL2	LoF	p.Q3744_Q3745dupQQ	-/QQ	3744	-	ENST00000301067	5538.0	54
36	Very high	BRCA	c.11220_11222dupGCA	InFrameInsertion	1158	predicted	TIER 2	39	chr12:g.49427284_49427286dupTGC	chr12:g.49427265T>TTGC	MLL2	LoF	p.Q3745dupQ	-/Q	3745	-	ENST00000301067	5538.0	54
36	Very high	BRCA	c.11756_11758delAGC	InFrameDeletion	1033	predicted	TIER 2	39	chr12:g.49426749_49426751delCTG	chr12:g.49426729AGCT>A	MLL2	LoF	p.Q3919delQ	Q/-	3919	-	ENST00000301067	5538.0	54
36	Very high	BRCA	c.11753_11758dupAGCAGC	InFrameInsertion	1031	predicted	TIER 2	39	chr12:g.49426746_49426751dupCTGCTG	chr12:g.49426729A>AGCTGCT	MLL2	LoF	p.Q3918_Q3919dupQQ	-/QQ	3918	-	ENST00000301067	5538.0	54
36	Very high	BRCA	c.11796_11798delACA	InFrameDeletion	1019	predicted	TIER 2	39	chr12:g.49426692_49426694delTTG	chr12:g.49426689CTGT>C	MLL2	LoF	p.Q3939delQ	Q/-	3939	-	ENST00000301067	5538.0	54
36	Very high	BRCA	c.11802_11804delGCA	InFrameDeletion	1017	predicted	TIER 2	39	chr12:g.49426689_49426691delCTG	chr12:g.49426683TTGC>T	MLL2	LoF	p.Q3939delQ	Q/-	3939	-	ENST00000301067	5538.0	54
36	Very high	BRCA	c.11844_11852delTCAACAGCA	InFrameDeletion	994	predicted	TIER 2	39	chr12:g.49426636_49426644delTGCTGTTGA	chr12:g.49426635CTGCTGTTGA>C	MLL2	LoF	p.Q3952_Q3954delQQQ	QQQ/-	3952	-	ENST00000301067	5538.0	54
36	Very high	BRCA	c.11855_11863delAACAGCAGC	InFrameDeletion	989	predicted	TIER 2	39	chr12:g.49426635_49426643delCTGCTGTTG	chr12:g.49426624AGCTGCTGTT>A	MLL2	LoF	p.Q3952_Q3954delQQQ	QQQ/-	3952	-	ENST00000301067	5538.0	54
36	Very high	BRCA	c.11856_11876dupACAGCAGCTACAACAGCAACA	InFrameInsertion	986	predicted	TIER 2	39	chr12:g.49426614_49426634dupTTGCTGTTGTAGCTGCTGTTG	chr12:g.49426611C>CTGTTGCTGTTGTAGCTGCTGT	MLL2	LoF	p.L3955_Q3961dupLQQQQQQ	-/LQQQQQQ	3955	-	ENST00000301067	5538.0	54
36	Very high	BRCA	c.11862_11879delGCTACAACAGCAACAGCA	InFrameDeletion	985	predicted	TIER 2	39	chr12:g.49426620_49426637delTTGTAGCTGCTGTTGCTG	chr12:g.49426608TTGCTGTTGCTGTTGTAGC>T	MLL2	LoF	p.L3955_Q3960delLQQQQQ	LQQQQQ/-	3955	-	ENST00000301067	5538.0	54
36	Very high	BRCA	c.11877_11882dupGCAACA	InFrameInsertion	981	predicted	TIER 2	39	chr12:g.49426617_49426622dupCTGTTG	chr12:g.49426605T>TTGTTGC	MLL2	LoF	p.Q3964_Q3965dupQQ	-/QQ	3964	-	ENST00000301067	5538.0	54
36	Very high	BRCA	c.11893_11895dupCAG	InFrameInsertion	972	predicted	TIER 2	39	chr12:g.49426599_49426601dupCTG	chr12:g.49426592A>ACTG	MLL2	LoF	p.Q3965dupQ	-/Q	3965	-	ENST00000301067	5538.0	54
36	Very high	BRCA	c.11896_11910dupTTTCAACAGCAGCAG	InFrameInsertion	967	predicted	TIER 2	39	chr12:g.49426590_49426604dupAAACTGCTGCTGTTG	chr12:g.49426577G>GCTGCTGCTGTTGAAA	MLL2	LoF	p.F3966_Q3970dupFQQQQ	-/FQQQQ	3966	-	ENST00000301067	5538.0	54
36	Very high	BRCA	c.1034_1036delTCA	MultiAAMissense	733	predicted	TIER 1	10	chr16:g.15865444_15865446delTGA	chr16:g.15865443CTGA>C	MYH11	Act	p.F345_S346delinsC	insC/-	345	-	ENST00000396324	1980.0	42
36	Very high	BRCA	c.1240C>T	Nonsense	2996	predicted	TIER 1	12	chr17:g.16042434G>A	chr17:g.16042434G>A	NCOR1	LoF	p.R414*	R/*	414	-	ENST00000268712	2441.0	46
36	Very high	BRCA	c.1561A>T	Nonsense	2859	predicted	TIER 1	15	chr17:g.16029469T>A	chr17:g.16029469T>A	NCOR1	LoF	p.K521*	K/*	521	-	ENST00000268712	2441.0	46
36	Very high	BRCA	c.1582_1584delAAA	InFrameDeletion	2854	predicted	TIER 2	15	chr17:g.16029451_16029453delTTT	chr17:g.16029445CTTT>C	NCOR1	LoF	p.K528delK	K/-	528	-	ENST00000268712	2441.0	46
36	Very high	BRCA	c.5179_5184dupGAACGG	InFrameInsertion	1361	predicted	TIER 2	35	chr17:g.15967422_15967427dupTTCCCG	chr17:g.15967418T>TCCGTTC	NCOR1	LoF	p.E1727_R1728dupER	-/ER	1727	-	ENST00000268712	2441.0	46
36	Very high	BRCA	c.24_35dupCAGCCGCGCCGA	InFrameInsertion	2673	predicted	TIER 2	1	chr8:g.68864653_68864664dupCAGCCGCGCCGA	chr8:g.68864650A>AGACAGCCGCGCC	PREX2	ambiguous	p.D8_A11dupDSRA	-/DSRA	8	+	ENST00000288368	1607.0	40
36	Very high	BRCA	c.3163_3164delTG	Frameshift	2501	predicted	TIER 2	26	chr19:g.50920471_50920472delTG	chr19:g.50920470CTG>C	POLD1	ambiguous	p.W1055Dfs*50	W/.	1055	+	ENST00000440232	1108.0	27
36	Very high	BRCA	c.587_589+1delAGAG	Frameshift	931	predicted	TIER 2	5	chr19:g.50905379_50905382delAGAG	chr19:g.50905375CGAGA>C	POLD1	ambiguous	p.E196Afs*79	E/.	196	+	ENST00000440232	1108.0	27
36	Very high	BRCA	c.1398_1418delAGAGGAGGAGGAAGAGGCGGA	InFrameDeletion	2554	predicted	TIER 2	2	chr16:g.72992630_72992650delGCCTCTTCCTCCTCCTCTTCC	chr16:g.72992626CTCCGCCTCTTCCTCCTCCTCT>C	ZFHX3	LoF	p.A472_E478delAEEEEEE	AEEEEEE/-	472	-	ENST00000268489	3704.0	10
36	Very high	BRCA	c.1398_1424delAGAGGAGGAGGAAGAGGCGGAGGAGGA	InFrameDeletion	2551	predicted	TIER 2	2	chr16:g.72992635_72992661delTTCCTCCTCCTCTTCCTCCTCCGCCTC	chr16:g.72992620CTCCTCCTCCGCCTCTTCCTCCTCCTCT>C	ZFHX3	LoF	p.A472_E480delAEEEEEEEE	AEEEEEEEE/-	472	-	ENST00000268489	3704.0	10
36	Very high	BRCA	c.1410_1424delAGAGGCGGAGGAGGA	InFrameDeletion	2550	predicted	TIER 2	2	chr16:g.72992630_72992644delGCCTCTTCCTCCTCC	chr16:g.72992620CTCCTCCTCCGCCTCT>C	ZFHX3	LoF	p.A472_E476delAEEEE	AEEEE/-	472	-	ENST00000268489	3704.0	10
36	Very high	BRCA	c.1425_1430delGGAGGA	InFrameDeletion	2541	predicted	TIER 2	2	chr16:g.72992624_72992629delTCCTCC	chr16:g.72992614TTCCTCC>T	ZFHX3	LoF	p.E486_E487delEE	EE/-	486	-	ENST00000268489	3704.0	10
36	Very high	BRCA	c.1413_1433delGGCGGAGGAGGAGGAGGAAGA	InFrameDeletion	2536	predicted	TIER 2	2	chr16:g.72992626_72992646delCTCCGCCTCTTCCTCCTCCTC	chr16:g.72992611TTCTTCCTCCTCCTCCTCCGCC>T	ZFHX3	LoF	p.A472_E478delAEEEEEE	AEEEEEE/-	472	-	ENST00000268489	3704.0	10
36	Very high	BRCA	c.1434_1436delAGA	InFrameDeletion	2533	predicted	TIER 2	2	chr16:g.72992614_72992616delTTC	chr16:g.72992608CTCT>C	ZFHX3	LoF	p.E487delE	E/-	487	-	ENST00000268489	3704.0	10
36	Very high	BRCA	c.1425_1445delGGAGGAAGAAGAGGAGGAGGA	InFrameDeletion	2530	predicted	TIER 2	2	chr16:g.72992609_72992629delTCTTCTTCCTCCTCCTCCTCC	chr16:g.72992599TTCCTCCTCCTCTTCTTCCTCC>T	ZFHX3	LoF	p.E481_E487delEEEEEEE	EEEEEEE/-	481	-	ENST00000268489	3704.0	10
36	Very high	BRCA	c.1443_1445delGGA	InFrameDeletion	2529	predicted	TIER 2	2	chr16:g.72992608_72992610delCTC	chr16:g.72992599TTCC>T	ZFHX3	LoF	p.E487delE	E/-	487	-	ENST00000268489	3704.0	10
36	Very high	BRCA	c.1443_1445dupGGA	InFrameInsertion	2528	predicted	TIER 2	2	chr16:g.72992608_72992610dupCTC	chr16:g.72992599T>TTCC	ZFHX3	LoF	p.E487dupE	-/E	487	-	ENST00000268489	3704.0	10
36	Very high	BRCA	c.1413_1448delGGCGGAGGAGGAGGAGGAAGAAGAGGAGGAGGAAGA	InFrameDeletion	2527	predicted	TIER 2	2	chr16:g.72992614_72992649delTTCCTCCTCCTCCTCCGCCTCTTCCTCCTCCTCTTC	chr16:g.72992596TTCTTCCTCCTCCTCTTCTTCCTCCTCCTCCTCCGCC>T	ZFHX3	LoF	p.A472_E483delAEEEEEEEEEEE	AEEEEEEEEEEE/-	472	-	ENST00000268489	3704.0	10
36	Very high	BRCA	c.1437_1448delGGAGGAGGAAGA	InFrameDeletion	2525	predicted	TIER 2	2	chr16:g.72992602_72992613delCTCCTCCTCTTC	chr16:g.72992596TTCTTCCTCCTCC>T	ZFHX3	LoF	p.E484_E487delEEEE	EEEE/-	484	-	ENST00000268489	3704.0	10
36	Very high	BRCA	c.1446_1457delAGAAGAGGAGGA	InFrameDeletion	2521	predicted	TIER 2	2	chr16:g.72992596_72992607delTTCTTCCTCCTC	chr16:g.72992587CTCCTCCTCTTCT>C	ZFHX3	LoF	p.E484_E487delEEEE	EEEE/-	484	-	ENST00000268489	3704.0	10
36	Very high	BRCA	c.1458_1460delGGA	InFrameDeletion	2519	predicted	TIER 2	2	chr16:g.72992593_72992595delCTC	chr16:g.72992584TTCC>T	ZFHX3	LoF	p.E487delE	E/-	487	-	ENST00000268489	3704.0	10
36	Very high	BRCA	c.1449_1463delAGAGGAGGAGGAAGA	InFrameDeletion	2518	predicted	TIER 2	2	chr16:g.72992611_72992625delTTCTTCCTCCTCCTC	chr16:g.72992581GTCTTCCTCCTCCTCT>G	ZFHX3	LoF	p.E483_E487delEEEEE	EEEEE/-	483	-	ENST00000268489	3704.0	10
36	Very high	BRCA	c.1434_1463dupAGAGGAGGAGGAAGAAGAGGAGGAGGAAGA	InFrameInsertion	2517	predicted	TIER 2	2	chr16:g.72992596_72992625dupTTCTTCCTCCTCCTCTTCTTCCTCCTCCTC	chr16:g.72992581G>GTCTTCCTCCTCCTCTTCTTCCTCCTCCTCT	ZFHX3	LoF	p.E478_E487dupEEEEEEEEEE	-/EEEEEEEEEE	478	-	ENST00000268489	3704.0	10
36	Very high	BRCA	c.1449_1463dupAGAGGAGGAGGAAGA	InFrameInsertion	2516	predicted	TIER 2	2	chr16:g.72992611_72992625dupTTCTTCCTCCTCCTC	chr16:g.72992581G>GTCTTCCTCCTCCTCT	ZFHX3	LoF	p.E483_E487dupEEEEE	-/EEEEE	483	-	ENST00000268489	3704.0	10
36	Very high	BRCA	c.1454_1468delAGGAGGAAGACGAGG	InFrameDeletion	2512	predicted	TIER 2	2	chr16:g.72992581_72992595delGTCTTCCTCCTCCTC	chr16:g.72992576CCCTCGTCTTCCTCCT>C	ZFHX3	LoF	p.E485_E489delEEEDE	EEEDE/-	485	-	ENST00000268489	3704.0	10
36	Very high	BRCA	c.3925C>T	Nonsense	1394	predicted	TIER 1	8	chr16:g.72833968G>A	chr16:g.72833968G>A	ZFHX3	LoF	p.R1309*	R/*	1309	-	ENST00000268489	3704.0	10
36	Very high	BRCA	c.5178_5180delACA	InFrameDeletion	993	predicted	TIER 2	9	chr16:g.72831406_72831408delTTG	chr16:g.72831400CTGT>C	ZFHX3	LoF	p.Q1741delQ	Q/-	1741	-	ENST00000268489	3704.0	10
36	Very high	BRCA	c.5175_5186delACAACAGCAGCA	InFrameDeletion	988	predicted	TIER 2	9	chr16:g.72831403_72831414delTTGTTGCTGCTG	chr16:g.72831394CTGCTGCTGTTGT>C	ZFHX3	LoF	p.Q1738_Q1741delQQQQ	QQQQ/-	1738	-	ENST00000268489	3704.0	10
36	Very high	BRCA	c.5186_5187insACA	InFrameInsertion	990	predicted	TIER 2	9	chr16:g.72831396_72831397insTTG	chr16:g.72831394C>CTGT	ZFHX3	LoF	p.Q1741dupQ	-/Q	1741	-	ENST00000268489	3704.0	10
36	Very high	BRCA	c.5184_5189delGCAGCA	InFrameDeletion	986	predicted	TIER 2	9	chr16:g.72831397_72831402delCTGCTG	chr16:g.72831391TTGCTGC>T	ZFHX3	LoF	p.Q1740_Q1741delQQ	QQ/-	1740	-	ENST00000268489	3704.0	10
36	Very high	BRCA	c.5187_5189delGCA	InFrameDeletion	985	predicted	TIER 2	9	chr16:g.72831400_72831402delCTG	chr16:g.72831391TTGC>T	ZFHX3	LoF	p.Q1741delQ	Q/-	1741	-	ENST00000268489	3704.0	10
36	Very high	BRCA	c.5184_5189dupGCAGCA	InFrameInsertion	984	predicted	TIER 2	9	chr16:g.72831397_72831402dupCTGCTG	chr16:g.72831391T>TTGCTGC	ZFHX3	LoF	p.Q1740_Q1741dupQQ	-/QQ	1740	-	ENST00000268489	3704.0	10
36	Very high	BRCA	c.5193_5198dupGCAACA	InFrameInsertion	971	predicted	TIER 2	9	chr16:g.72831391_72831396dupTTGCTG	chr16:g.72831382T>TTGTTGC	ZFHX3	LoF	p.Q1740_Q1741dupQQ	-/QQ	1740	-	ENST00000268489	3704.0	10
36	Very high	BRCA	c.5193_5204delGCAACAACAACA	InFrameDeletion	968	predicted	TIER 2	9	chr16:g.72831382_72831393delTTGTTGCTGTTG	chr16:g.72831376TTGTTGTTGTTGC>T	ZFHX3	LoF	p.Q1738_Q1741delQQQQ	QQQQ/-	1738	-	ENST00000268489	3704.0	10
36	Very high	BRCA	c.5204_5205insGCAACA	InFrameInsertion	967	predicted	TIER 2	9	chr16:g.72831381_72831382insCTGTTG	chr16:g.72831376T>TTGTTGC	ZFHX3	LoF	p.Q1740_Q1741dupQQ	-/QQ	1740	-	ENST00000268489	3704.0	10
36	Very high	BRCA	c.5212_5223delCAACAACAACAA	InFrameDeletion	961	predicted	TIER 2	9	chr16:g.72831376_72831387delTTGTTGTTGTTG	chr16:g.72831357CTTGTTGTTGTTG>C	ZFHX3	LoF	p.Q1738_Q1741delQQQQ	QQQQ/-	1738	-	ENST00000268489	3704.0	10
36	Very high	BRCA	c.5215_5223delCAACAACAA	InFrameDeletion	960	predicted	TIER 2	9	chr16:g.72831379_72831387delTTGTTGTTG	chr16:g.72831357CTTGTTGTTG>C	ZFHX3	LoF	p.Q1739_Q1741delQQQ	QQQ/-	1739	-	ENST00000268489	3704.0	10
35	Very high	BRCA	c.3743G>A	Missense	4981	predicted	TIER 1	24	chr2:g.29436850C>T	chr2:g.29436850C>T	ALK	Act	p.R1248Q	R/Q	1248	-	ENST00000389048	1621.0	29
35	Very high	BRCA	c.4040G>A	Missense	4784	predicted	TIER 1	27	chr2:g.29420441C>T	chr2:g.29420441C>T	ALK	Act	p.R1347Q	R/Q	1347	-	ENST00000389048	1621.0	29
35	Very high	BRCA	c.4078C>T	Missense	4736	predicted	TIER 1	28	chr2:g.29419722G>A	chr2:g.29419722G>A	ALK	Act	p.R1360W	R/W	1360	-	ENST00000389048	1621.0	29
35	Very high	BRCA	c.4723C>T	Missense	4470	predicted	TIER 1	29	chr2:g.29416230G>A	chr2:g.29416230G>A	ALK	Act	p.R1575C	R/C	1575	-	ENST00000389048	1621.0	29
35	Very high	BRCA	c.4724G>A	Missense	4469	predicted	TIER 1	29	chr2:g.29416229C>T	chr2:g.29416229C>T	ALK	Act	p.R1575H	R/H	1575	-	ENST00000389048	1621.0	29
35	Very high	BRCA	c.4724G>C	Missense	4468	predicted	TIER 1	29	chr2:g.29416229C>G	chr2:g.29416229C>G	ALK	Act	p.R1575P	R/P	1575	-	ENST00000389048	1621.0	29
35	Very high	BRCA	c.4724G>T	Missense	4467	predicted	TIER 1	29	chr2:g.29416229C>A	chr2:g.29416229C>A	ALK	Act	p.R1575L	R/L	1575	-	ENST00000389048	1621.0	29
35	Very high	BRCA	c.233G>A	Missense	1215	predicted	TIER 1	3	chr1:g.179100604C>T	chr1:g.179100604C>T	ABL2	Act	p.R78H	R/H	78	-	ENST00000502732	1183.0	12
35	Very high	BRCA	c.710G>T	Missense	1034	predicted	TIER 1	5	chr1:g.179090980C>A	chr1:g.179090980C>A	ABL2	Act	p.R237L	R/L	237	-	ENST00000502732	1183.0	12
35	Very high	BRCA	c.1060G>A	Missense	905	predicted	TIER 1	7	chr1:g.179087885C>T	chr1:g.179087885C>T	ABL2	Act	p.E354K	E/K	354	-	ENST00000502732	1183.0	12
35	Very high	BRCA	c.1508G>A	Missense	761	predicted	TIER 1	9	chr1:g.179084066C>T	chr1:g.179084066C>T	ABL2	Act	p.R503Q	R/Q	503	-	ENST00000502732	1183.0	12
35	Very high	BRCA	c.1739G>A	Missense	583	predicted	TIER 1	11	chr1:g.179079503C>T	chr1:g.179079503C>T	ABL2	Act	p.R580Q	R/Q	580	-	ENST00000502732	1183.0	12
35	Very high	BRCA	c.700G>A	Missense	3907	predicted	TIER 1	7	chr14:g.105240251C>T	chr14:g.105240251C>T	AKT1	Act	p.E234K	E/K	234	-	ENST00000554581	481.0	13
35	Very high	BRCA	c.206G>A	Missense	2022	predicted	TIER 1	1	chr2:g.30143320C>T	chr2:g.30143320C>T	ALK	Act	p.R69Q	R/Q	69	-	ENST00000389048	1621.0	29
35	Very high	BRCA	c.407G>A	Missense	1948	predicted	TIER 1	1	chr2:g.30143119C>T	chr2:g.30143119C>T	ALK	Act	p.R136Q	R/Q	136	-	ENST00000389048	1621.0	29
35	Very high	BRCA	c.439G>A	Missense	1939	predicted	TIER 1	1	chr2:g.30143087C>T	chr2:g.30143087C>T	ALK	Act	p.E147K	E/K	147	-	ENST00000389048	1621.0	29
35	Very high	BRCA	c.563G>A	Missense	1893	predicted	TIER 1	1	chr2:g.30142963C>T	chr2:g.30142963C>T	ALK	Act	p.R188H	R/H	188	-	ENST00000389048	1621.0	29
35	Very high	BRCA	c.776G>A	Missense	1778	predicted	TIER 1	2	chr2:g.29940455C>T	chr2:g.29940455C>T	ALK	Act	p.R259H	R/H	259	-	ENST00000389048	1621.0	29
35	Very high	BRCA	c.2218G>A	Missense	943	predicted	TIER 1	13	chr2:g.29462683C>T	chr2:g.29462683C>T	ALK	Act	p.G740R	G/R	740	-	ENST00000389048	1621.0	29
35	Very high	BRCA	c.2230G>A	Missense	941	predicted	TIER 1	13	chr2:g.29462671C>T	chr2:g.29462671C>T	ALK	Act	p.G744R	G/R	744	-	ENST00000389048	1621.0	29
35	Very high	BRCA	c.2239G>A	Missense	938	predicted	TIER 1	13	chr2:g.29462662C>T	chr2:g.29462662C>T	ALK	Act	p.G747R	G/R	747	-	ENST00000389048	1621.0	29
35	Very high	BRCA	c.2258G>A	Missense	931	predicted	TIER 1	13	chr2:g.29462643C>T	chr2:g.29462643C>T	ALK	Act	p.R753Q	R/Q	753	-	ENST00000389048	1621.0	29
35	Very high	BRCA	c.2258G>T	Missense	930	predicted	TIER 1	13	chr2:g.29462643C>A	chr2:g.29462643C>A	ALK	Act	p.R753L	R/L	753	-	ENST00000389048	1621.0	29
35	Very high	BRCA	c.2416C>T	Missense	831	predicted	TIER 1	14	chr2:g.29456502G>A	chr2:g.29456502G>A	ALK	Act	p.R806C	R/C	806	-	ENST00000389048	1621.0	29
35	Very high	BRCA	c.2417G>T	Missense	830	predicted	TIER 1	14	chr2:g.29456501C>A	chr2:g.29456501C>A	ALK	Act	p.R806L	R/L	806	-	ENST00000389048	1621.0	29
35	Very high	BRCA	c.2452G>A	Missense	815	predicted	TIER 1	14	chr2:g.29456466C>T	chr2:g.29456466C>T	ALK	Act	p.G818R	G/R	818	-	ENST00000389048	1621.0	29
35	Very high	BRCA	c.2614G>A	Missense	730	predicted	TIER 1	15	chr2:g.29455188C>T	chr2:g.29455188C>T	ALK	Act	p.G872S	G/S	872	-	ENST00000389048	1621.0	29
35	Very high	BRCA	c.2629G>A	Missense	725	predicted	TIER 1	15	chr2:g.29455173C>T	chr2:g.29455173C>T	ALK	Act	p.A877T	A/T	877	-	ENST00000389048	1621.0	29
35	Very high	BRCA	c.2818G>A	Missense	584	predicted	TIER 1	17	chr2:g.29450536C>T	chr2:g.29450536C>T	ALK	Act	p.G940S	G/S	940	-	ENST00000389048	1621.0	29
35	Very high	BRCA	c.2818G>T	Missense	585	predicted	TIER 1	17	chr2:g.29450536C>A	chr2:g.29450536C>A	ALK	Act	p.G940C	G/C	940	-	ENST00000389048	1621.0	29
35	Very high	BRCA	c.3376G>A	Missense	275	predicted	TIER 1	21	chr2:g.29445457C>T	chr2:g.29445457C>T	ALK	Act	p.A1126T	A/T	1126	-	ENST00000389048	1621.0	29
35	Very high	BRCA	c.3626G>A	Missense	45	predicted	TIER 1	23	chr2:g.29443591C>T	chr2:g.29443591C>T	ALK	Act	p.R1209Q	R/Q	1209	-	ENST00000389048	1621.0	29
35	Very high	BRCA	c.3634C>T	Missense	41	predicted	TIER 1	23	chr2:g.29443583G>A	chr2:g.29443583G>A	ALK	Act	p.R1212C	R/C	1212	-	ENST00000389048	1621.0	29
35	Very high	BRCA	c.3635G>A	Missense	39	predicted	TIER 1	23	chr2:g.29443582C>T	chr2:g.29443582C>T	ALK	Act	p.R1212H	R/H	1212	-	ENST00000389048	1621.0	29
35	Very high	BRCA	c.786_788delGTC	InFrameDeletion	4506	predicted	TIER 2	1	chr1:g.27023680_27023682delGTC	chr1:g.27023674CTCG>C	ARID1A	LoF	p.S265delS	S/-	265	+	ENST00000324856	2286.0	20
35	Very high	BRCA	c.261_278dupAGCCGGCAGCGGCGGCGG	InFrameInsertion	4369	predicted	TIER 2	1	chr1:g.27023155_27023172dupAGCCGGCAGCGGCGGCGG	chr1:g.27023144G>GGCGGCGGCGGAGCCGGCA	ARID1A	LoF	p.A88_G93dupAGSGGG	-/AGSGGG	88	+	ENST00000324856	2286.0	20
35	Very high	BRCA	c.250_267delGGCGGCGGCGGAGCCGGC	InFrameDeletion	4367	predicted	TIER 2	1	chr1:g.27023144_27023161delGGCGGCGGCGGAGCCGGC	chr1:g.27023140TGGCGGCGGCGGCGGAGCC>T	ARID1A	LoF	p.G84_G89delGGGGAG	GGGGAG/-	84	+	ENST00000324856	2286.0	20
35	Very high	BRCA	c.258_260delCGG	InFrameDeletion	4366	predicted	TIER 2	1	chr1:g.27023152_27023154delCGG	chr1:g.27023140TGGC>T	ARID1A	LoF	p.G87delG	G/-	87	+	ENST00000324856	2286.0	20
35	Very high	BRCA	c.129_134dupAGCGGC	InFrameInsertion	4348	predicted	TIER 2	1	chr1:g.27023023_27023028dupAGCGGC	chr1:g.27023017G>GGCGGCA	ARID1A	LoF	p.A44_A45dupAA	-/AA	44	+	ENST00000324856	2286.0	20
35	Very high	BRCA	c.117_128dupGGCGGCGGCGGC	InFrameInsertion	4344	predicted	TIER 2	1	chr1:g.27023011_27023022dupGGCGGCGGCGGC	chr1:g.27023007A>AGGCGGCGGCGGC	ARID1A	LoF	p.A42_A45dupAAAA	-/AAAA	42	+	ENST00000324856	2286.0	20
35	Very high	BRCA	c.2413C>T	Nonsense	2161	known	TIER 1	16	chr11:g.108129749C>T	chr11:g.108129749C>T	ATM	LoF	p.R805*	R/*	805	+	ENST00000278616	3057.0	63
35	Very high	BRCA	c.850C>T	Nonsense	1423	known	TIER 1	7	chr11:g.108115702C>T	chr11:g.108115702C>T	ATM	LoF	p.Q284*	Q/*	284	+	ENST00000278616	3057.0	63
35	Very high	BRCA	c.3435_3448delCTCGCTACGCATGG	Frameshift	591	predicted	TIER 1	13	chr20:g.31023950_31023963delCTCGCTACGCATGG	chr20:g.31023944CCATGGCTCGCTACG>C	ASXL1	LoF	p.S1146Ifs*13	S/.	1146	+	ENST00000375687	1542.0	13
35	Very high	BRCA	c.2893C>T	Nonsense	444	predicted	TIER 1	13	chr20:g.31023408C>T	chr20:g.31023408C>T	ASXL1	LoF	p.R965*	R/*	965	+	ENST00000375687	1542.0	13
35	Very high	BRCA	c.2644C>T	Nonsense	383	predicted	TIER 1	13	chr20:g.31023159C>T	chr20:g.31023159C>T	ASXL1	LoF	p.Q882*	Q/*	882	+	ENST00000375687	1542.0	13
35	Very high	BRCA	c.2644delC	Frameshift	382	predicted	TIER 1	13	chr20:g.31023159delC	chr20:g.31023158AC>A	ASXL1	LoF	p.Q882Kfs*4	Q/.	882	+	ENST00000375687	1542.0	13
35	Very high	BRCA	c.2641A>T	Nonsense	381	predicted	TIER 1	13	chr20:g.31023156A>T	chr20:g.31023156A>T	ASXL1	LoF	p.R881*	R/*	881	+	ENST00000375687	1542.0	13
35	Very high	BRCA	c.2617_2621delCCTCC	Frameshift	368	predicted	TIER 1	13	chr20:g.31023132_31023136delCCTCC	chr20:g.31023130GCCCTC>G	ASXL1	LoF	p.P873Yfs*5	P/.	873	+	ENST00000375687	1542.0	13
35	Very high	BRCA	c.2302C>T	Nonsense	280	predicted	TIER 1	13	chr20:g.31022817C>T	chr20:g.31022817C>T	ASXL1	LoF	p.Q768*	Q/*	768	+	ENST00000375687	1542.0	13
35	Very high	BRCA	c.2198delA	Frameshift	245	predicted	TIER 1	13	chr20:g.31022713delA	chr20:g.31022712CA>C	ASXL1	LoF	p.Q733Rfs*11	Q/.	733	+	ENST00000375687	1542.0	13
35	Very high	BRCA	c.2197delC	Frameshift	244	predicted	TIER 1	13	chr20:g.31022712delC	chr20:g.31022711AC>A	ASXL1	LoF	p.Q733Rfs*11	Q/.	733	+	ENST00000375687	1542.0	13
35	Very high	BRCA	c.2173A>T	Nonsense	234	predicted	TIER 1	13	chr20:g.31022688A>T	chr20:g.31022688A>T	ASXL1	LoF	p.R725*	R/*	725	+	ENST00000375687	1542.0	13
35	Very high	BRCA	c.2060_2061delGT	Frameshift	200	predicted	TIER 1	13	chr20:g.31022575_31022576delGT	chr20:g.31022572AGT>A	ASXL1	LoF	p.C687Yfs*30	C/.	687	+	ENST00000375687	1542.0	13
35	Very high	BRCA	c.8155C>T	Missense	4869	predicted	TIER 1	56	chr11:g.108206575C>T	chr11:g.108206575C>T	ATM	LoF	p.R2719C	R/C	2719	+	ENST00000278616	3057.0	63
35	Very high	BRCA	c.8071C>T	Missense	4810	predicted	TIER 1	55	chr11:g.108205756C>T	chr11:g.108205756C>T	ATM	LoF	p.R2691C	R/C	2691	+	ENST00000278616	3057.0	63
35	Very high	BRCA	c.7381C>T	Missense	4475	predicted	TIER 1	50	chr11:g.108201014C>T	chr11:g.108201014C>T	ATM	LoF	p.R2461C	R/C	2461	+	ENST00000278616	3057.0	63
35	Very high	BRCA	c.7223C>T	Missense	4403	predicted	TIER 1	49	chr11:g.108199881C>T	chr11:g.108199881C>T	ATM	LoF	p.S2408L	S/L	2408	+	ENST00000278616	3057.0	63
35	Very high	BRCA	c.7174C>T	Missense	4390	predicted	TIER 1	49	chr11:g.108199832C>T	chr11:g.108199832C>T	ATM	LoF	p.R2392W	R/W	2392	+	ENST00000278616	3057.0	63
35	Very high	BRCA	c.7000_7003delTACA	Frameshift	4326	predicted	TIER 1	48	chr11:g.108198396_108198399delTACA	chr11:g.108198391TTACA>T	ATM	LoF	p.Y2334Qfs*4	Y/.	2334	+	ENST00000278616	3057.0	63
35	Very high	BRCA	c.5769_5771delTTC	InFrameDeletion	3740	predicted	TIER 2	39	chr11:g.108180893_108180895delTTC	chr11:g.108180888CCTT>C	ATM	LoF	p.S1924delS	S/-	1924	+	ENST00000278616	3057.0	63
35	Very high	BRCA	c.4668T>G	Nonsense	3250	predicted	TIER 1	31	chr11:g.108164096T>G	chr11:g.108164096T>G	ATM	LoF	p.Y1556*	Y/*	1556	+	ENST00000278616	3057.0	63
35	Very high	BRCA	c.4465C>T	Missense	3161	predicted	TIER 1	30	chr11:g.108163374C>T	chr11:g.108163374C>T	ATM	LoF	p.R1489C	R/C	1489	+	ENST00000278616	3057.0	63
35	Very high	BRCA	c.2958_2961delTTGT	Frameshift	2478	predicted	TIER 1	20	chr11:g.108142014_108142017delTTGT	chr11:g.108142010ATGTT>A	ATM	LoF	p.C987Kfs*4	C/.	987	+	ENST00000278616	3057.0	63
35	Very high	BRCA	c.2554C>T	Nonsense	2239	predicted	TIER 1	17	chr11:g.108137985C>T	chr11:g.108137985C>T	ATM	LoF	p.Q852*	Q/*	852	+	ENST00000278616	3057.0	63
35	Very high	BRCA	c.2465T>G	Nonsense	2175	predicted	TIER 1	16	chr11:g.108129801T>G	chr11:g.108129801T>G	ATM	LoF	p.L822*	L/*	822	+	ENST00000278616	3057.0	63
35	Very high	BRCA	c.1009C>T	Missense	1493	predicted	TIER 1	8	chr11:g.108117798C>T	chr11:g.108117798C>T	ATM	LoF	p.R337C	R/C	337	+	ENST00000278616	3057.0	63
35	Very high	BRCA	c.939C>A	Nonsense	1474	predicted	TIER 1	8	chr11:g.108117728C>A	chr11:g.108117728C>A	ATM	LoF	p.Y313*	Y/*	313	+	ENST00000278616	3057.0	63
35	Very high	BRCA	c.140C>G	Nonsense	1085	predicted	TIER 1	3	chr11:g.108098570C>G	chr11:g.108098570C>G	ATM	LoF	p.S47*	S/*	47	+	ENST00000278616	3057.0	63
35	Very high	BRCA	c.34C>T	Nonsense	4766	known	TIER 1	2	chr17:g.41276080G>A	chr17:g.41276080G>A	BRCA1	LoF	p.Q12*	Q/*	12	-	ENST00000357654	1864.0	23
35	Very high	BRCA	c.390C>A	Nonsense	4540	known	TIER 1	6	chr17:g.41256190G>T	chr17:g.41256190G>T	BRCA1	LoF	p.Y130*	Y/*	130	-	ENST00000357654	1864.0	23
35	Very high	BRCA	c.962G>A	Nonsense	4250	known	TIER 1	10	chr17:g.41246586C>T	chr17:g.41246586C>T	BRCA1	LoF	p.W321*	W/*	321	-	ENST00000357654	1864.0	23
35	Very high	BRCA	c.1687C>T	Nonsense	4073	known	TIER 1	10	chr17:g.41245861G>A	chr17:g.41245861G>A	BRCA1	LoF	p.Q563*	Q/*	563	-	ENST00000357654	1864.0	23
35	Very high	BRCA	c.1793T>G	Nonsense	4045	known	TIER 1	10	chr17:g.41245755A>C	chr17:g.41245755A>C	BRCA1	LoF	p.L598*	L/*	598	-	ENST00000357654	1864.0	23
35	Very high	BRCA	c.2138C>G	Nonsense	3955	known	TIER 1	10	chr17:g.41245410G>C	chr17:g.41245410G>C	BRCA1	LoF	p.S713*	S/*	713	-	ENST00000357654	1864.0	23
35	Very high	BRCA	c.2389G>T	Nonsense	3886	known	TIER 1	10	chr17:g.41245159C>A	chr17:g.41245159C>A	BRCA1	LoF	p.E797*	E/*	797	-	ENST00000357654	1864.0	23
35	Very high	BRCA	c.3331C>T	Nonsense	3637	known	TIER 1	10	chr17:g.41244217G>A	chr17:g.41244217G>A	BRCA1	LoF	p.Q1111*	Q/*	1111	-	ENST00000357654	1864.0	23
35	Very high	BRCA	c.3400G>T	Nonsense	3617	known	TIER 1	10	chr17:g.41244148C>A	chr17:g.41244148C>A	BRCA1	LoF	p.E1134*	E/*	1134	-	ENST00000357654	1864.0	23
35	Very high	BRCA	c.3598C>T	Nonsense	3562	known	TIER 1	10	chr17:g.41243950G>A	chr17:g.41243950G>A	BRCA1	LoF	p.Q1200*	Q/*	1200	-	ENST00000357654	1864.0	23
35	Very high	BRCA	c.3607C>T	Nonsense	3557	known	TIER 1	10	chr17:g.41243941G>A	chr17:g.41243941G>A	BRCA1	LoF	p.R1203*	R/*	1203	-	ENST00000357654	1864.0	23
35	Very high	BRCA	c.3748G>T	Nonsense	3506	known	TIER 1	10	chr17:g.41243800C>A	chr17:g.41243800C>A	BRCA1	LoF	p.E1250*	E/*	1250	-	ENST00000357654	1864.0	23
35	Very high	BRCA	c.4327C>T	Nonsense	3299	known	TIER 1	12	chr17:g.41234451G>A	chr17:g.41234451G>A	BRCA1	LoF	p.R1443*	R/*	1443	-	ENST00000357654	1864.0	23
35	Very high	BRCA	c.4508C>A	Nonsense	3153	known	TIER 1	14	chr17:g.41226515G>T	chr17:g.41226515G>T	BRCA1	LoF	p.S1503*	S/*	1503	-	ENST00000357654	1864.0	23
35	Very high	BRCA	c.5095C>T	Missense	2903	known	TIER 1	17	chr17:g.41215948G>A	chr17:g.41215948G>A	BRCA1	LoF	p.R1699W	R/W	1699	-	ENST00000357654	1864.0	23
35	Very high	BRCA	c.5096G>A	Missense	2902	known	TIER 1	17	chr17:g.41215947C>T	chr17:g.41215947C>T	BRCA1	LoF	p.R1699Q	R/Q	1699	-	ENST00000357654	1864.0	23
35	Very high	BRCA	c.8494C>T	Missense	7	known	TIER 1	58	chr11:g.108216545C>T	chr11:g.108216545C>T	ATM	LoF	p.R2832C	R/C	2832	+	ENST00000278616	3057.0	63
35	Very high	BRCA	c.1673G>A	Missense	1831	predicted	TIER 1	13	chr7:g.140476733C>T	chr7:g.140476733C>T	BRAF	Act	p.R558Q	R/Q	558	-	ENST00000288602	767.0	18
35	Very high	BRCA	c.1867G>A	Missense	1709	predicted	TIER 1	16	chr7:g.140449212C>T	chr7:g.140449212C>T	BRAF	Act	p.E623K	E/K	623	-	ENST00000288602	767.0	18
35	Very high	BRCA	c.2012G>A	Missense	1633	predicted	TIER 1	17	chr7:g.140439727C>T	chr7:g.140439727C>T	BRAF	Act	p.R671Q	R/Q	671	-	ENST00000288602	767.0	18
35	Very high	BRCA	c.2044C>T	Missense	1629	predicted	TIER 1	17	chr7:g.140439695G>A	chr7:g.140439695G>A	BRAF	Act	p.R682W	R/W	682	-	ENST00000288602	767.0	18
35	Very high	BRCA	c.166C>T	Missense	1343	predicted	TIER 1	4	chr3:g.52442579G>A	chr3:g.52442579G>A	BAP1	LoF	p.R56C	R/C	56	-	ENST00000460680	730.0	17
35	Very high	BRCA	c.307_309delTGC	InFrameDeletion	1283	predicted	TIER 2	5	chr3:g.52442041_52442043delCAG	chr3:g.52442039TGCA>T	BAP1	LoF	p.C103delC	C/-	103	-	ENST00000460680	730.0	17
35	Very high	BRCA	c.1067G>A	Missense	936	predicted	TIER 1	11	chr3:g.52439175C>T	chr3:g.52439175C>T	BAP1	LoF	p.R356Q	R/Q	356	-	ENST00000460680	730.0	17
35	Very high	BRCA	c.1148G>A	Missense	867	predicted	TIER 1	12	chr3:g.52438571C>T	chr3:g.52438571C>T	BAP1	LoF	p.R383H	R/H	383	-	ENST00000460680	730.0	17
35	Very high	BRCA	c.1154G>A	Missense	865	predicted	TIER 1	12	chr3:g.52438565C>T	chr3:g.52438565C>T	BAP1	LoF	p.R385Q	R/Q	385	-	ENST00000460680	730.0	17
35	Very high	BRCA	c.1165C>T	Missense	862	predicted	TIER 1	12	chr3:g.52438554G>A	chr3:g.52438554G>A	BAP1	LoF	p.R389C	R/C	389	-	ENST00000460680	730.0	17
35	Very high	BRCA	c.923delG	Frameshift	4265	predicted	TIER 1	10	chr17:g.41246625delC	chr17:g.41246624GC>G	BRCA1	LoF	p.S308Tfs*6	S/.	308	-	ENST00000357654	1864.0	23
35	Very high	BRCA	c.1292dupT	Frameshift	4173	predicted	TIER 1	10	chr17:g.41246257dupA	chr17:g.41246255T>TA	BRCA1	LoF	p.L431Ffs*5	L/.	431	-	ENST00000357654	1864.0	23
35	Very high	BRCA	c.1881_1884delCAGT	Frameshift	4013	predicted	TIER 1	10	chr17:g.41245667_41245670delGACT	chr17:g.41245663TACTG>T	BRCA1	LoF	p.S628Efs*3	S/.	628	-	ENST00000357654	1864.0	23
35	Very high	BRCA	c.2018_2023delAACCTG	InFrameDeletion	3981	predicted	TIER 2	10	chr17:g.41245526_41245531delAGGTTC	chr17:g.41245524GCAGGTT>G	BRCA1	LoF	p.E673_P674delEP	EP/-	673	-	ENST00000357654	1864.0	23
35	Very high	BRCA	c.2191_2196delAAAGAA	InFrameDeletion	3941	predicted	TIER 2	10	chr17:g.41245357_41245362delTTTCTT	chr17:g.41245351CTTCTTT>C	BRCA1	LoF	p.K731_E732delKE	KE/-	731	-	ENST00000357654	1864.0	23
35	Very high	BRCA	c.2196_2198delAGA	InFrameDeletion	3940	predicted	TIER 2	10	chr17:g.41245354_41245356delCTT	chr17:g.41245349CTCT>C	BRCA1	LoF	p.E733delE	E/-	733	-	ENST00000357654	1864.0	23
35	Very high	BRCA	c.2716_2730delAAGGAAGAAAATCAA	InFrameDeletion	3792	predicted	TIER 2	10	chr17:g.41244821_41244835delATTTTCTTCCTTTTG	chr17:g.41244817CTTGATTTTCTTCCTT>C	BRCA1	LoF	p.K906_Q910delKEENQ	KEENQ/-	906	-	ENST00000357654	1864.0	23
35	Very high	BRCA	c.2796_2799delTGGT	Frameshift	3771	predicted	TIER 1	10	chr17:g.41244753_41244756delACCA	chr17:g.41244748GACCA>G	BRCA1	LoF	p.G933Rfs*66	G/.	933	-	ENST00000357654	1864.0	23
35	Very high	BRCA	c.3344_3346delAAG	InFrameDeletion	3633	predicted	TIER 2	10	chr17:g.41244206_41244208delTTC	chr17:g.41244201ACTT>A	BRCA1	LoF	p.E1115delE	E/-	1115	-	ENST00000357654	1864.0	23
35	Very high	BRCA	c.3782_3784dupTAT	InFrameInsertion	3493	predicted	TIER 2	10	chr17:g.41243768_41243770dupTAA	chr17:g.41243763G>GATA	BRCA1	LoF	p.L1261dupL	-/L	1261	-	ENST00000357654	1864.0	23
35	Very high	BRCA	c.3795_3797delTAG	InFrameDeletion	3490	predicted	TIER 2	10	chr17:g.41243751_41243753delCTA	chr17:g.41243750GCTA>G	BRCA1	LoF	p.S1266delS	S/-	1266	-	ENST00000357654	1864.0	23
35	Very high	BRCA	c.4745delA	Frameshift	3072	predicted	TIER 1	15	chr17:g.41223186delT	chr17:g.41223185GT>G	BRCA1	LoF	p.D1582Afs*19	D/.	1582	-	ENST00000357654	1864.0	23
35	Very high	BRCA	c.4807_4821delCCCCAATTGAAAGTT	InFrameDeletion	3046	predicted	TIER 2	15	chr17:g.41223120_41223134delTGGGGAACTTTCAAT	chr17:g.41223109CAACTTTCAATTGGGG>C	BRCA1	LoF	p.P1603_V1607delPQLKV	PQLKV/-	1603	-	ENST00000357654	1864.0	23
35	Very high	BRCA	c.210_217delTTATAATC	Frameshift	4963	predicted	TIER 1	3	chr13:g.32893356_32893363delTTATAATC	chr13:g.32893352CATCTTATA>C	BRCA2	LoF	p.Y71Afs*27	Y/.	71	+	ENST00000380152	3419.0	27
35	Very high	BRCA	c.8794G>A	Missense	174	predicted	TIER 1	61	chr11:g.108225545G>A	chr11:g.108225545G>A	ATM	LoF	p.E2932K	E/K	2932	+	ENST00000278616	3057.0	63
35	Very high	BRCA	c.8560C>T	Missense	24	predicted	TIER 1	58	chr11:g.108216611C>T	chr11:g.108216611C>T	ATM	LoF	p.R2854C	R/C	2854	+	ENST00000278616	3057.0	63
35	Very high	BRCA	c.8546G>A	Missense	18	predicted	TIER 1	58	chr11:g.108216597G>A	chr11:g.108216597G>A	ATM	LoF	p.R2849Q	R/Q	2849	+	ENST00000278616	3057.0	63
35	Very high	BRCA	c.6124C>T	Nonsense	1890	known	TIER 1	11	chr13:g.32914616C>T	chr13:g.32914616C>T	BRCA2	LoF	p.Q2042*	Q/*	2042	+	ENST00000380152	3419.0	27
35	Very high	BRCA	c.6065C>G	Nonsense	1869	known	TIER 1	11	chr13:g.32914557C>G	chr13:g.32914557C>G	BRCA2	LoF	p.S2022*	S/*	2022	+	ENST00000380152	3419.0	27
35	Very high	BRCA	c.5857G>T	Nonsense	1797	known	TIER 1	11	chr13:g.32914349G>T	chr13:g.32914349G>T	BRCA2	LoF	p.E1953*	E/*	1953	+	ENST00000380152	3419.0	27
35	Very high	BRCA	c.5782G>T	Nonsense	1773	known	TIER 1	11	chr13:g.32914274G>T	chr13:g.32914274G>T	BRCA2	LoF	p.E1928*	E/*	1928	+	ENST00000380152	3419.0	27
35	Very high	BRCA	c.5217_5223delTTTAAGT	Frameshift	1590	known	TIER 1	11	chr13:g.32913709_32913715delTTTAAGT	chr13:g.32913708ATTTAAGT>A	BRCA2	LoF	p.Y1739*fs*1	Y/.	1739	+	ENST00000380152	3419.0	27
35	Very high	BRCA	c.4965C>G	Nonsense	1519	known	TIER 1	11	chr13:g.32913457C>G	chr13:g.32913457C>G	BRCA2	LoF	p.Y1655*	Y/*	1655	+	ENST00000380152	3419.0	27
35	Very high	BRCA	c.4889C>G	Nonsense	1492	known	TIER 1	11	chr13:g.32913381C>G	chr13:g.32913381C>G	BRCA2	LoF	p.S1630*	S/*	1630	+	ENST00000380152	3419.0	27
35	Very high	BRCA	c.4859T>G	Nonsense	1484	known	TIER 1	11	chr13:g.32913351T>G	chr13:g.32913351T>G	BRCA2	LoF	p.L1620*	L/*	1620	+	ENST00000380152	3419.0	27
35	Very high	BRCA	c.4003G>T	Nonsense	1219	known	TIER 1	11	chr13:g.32912495G>T	chr13:g.32912495G>T	BRCA2	LoF	p.E1335*	E/*	1335	+	ENST00000380152	3419.0	27
35	Very high	BRCA	c.3785C>G	Nonsense	1171	known	TIER 1	11	chr13:g.32912277C>G	chr13:g.32912277C>G	BRCA2	LoF	p.S1262*	S/*	1262	+	ENST00000380152	3419.0	27
35	Very high	BRCA	c.3599_3600delGT	Frameshift	1120	known	TIER 1	11	chr13:g.32912091_32912092delGT	chr13:g.32912089CTG>C	BRCA2	LoF	p.C1200*fs*1	C/.	1200	+	ENST00000380152	3419.0	27
35	Very high	BRCA	c.2830A>T	Nonsense	889	known	TIER 1	11	chr13:g.32911322A>T	chr13:g.32911322A>T	BRCA2	LoF	p.K944*	K/*	944	+	ENST00000380152	3419.0	27
35	Very high	BRCA	c.2312T>G	Nonsense	749	known	TIER 1	11	chr13:g.32910804T>G	chr13:g.32910804T>G	BRCA2	LoF	p.L771*	L/*	771	+	ENST00000380152	3419.0	27
35	Very high	BRCA	c.1399A>T	Nonsense	487	known	TIER 1	10	chr13:g.32907014A>T	chr13:g.32907014A>T	BRCA2	LoF	p.K467*	K/*	467	+	ENST00000380152	3419.0	27
35	Very high	BRCA	c.10024G>A	Missense	3515	predicted	TIER 1	27	chr13:g.32972674G>A	chr13:g.32972674G>A	BRCA2	LoF	p.E3342K	E/K	3342	+	ENST00000380152	3419.0	27
35	Very high	BRCA	c.9699_9702delTATG	Frameshift	3432	predicted	TIER 1	27	chr13:g.32972349_32972352delTATG	chr13:g.32972346TTGTA>T	BRCA2	LoF	p.C3233Wfs*15	C/.	3233	+	ENST00000380152	3419.0	27
35	Very high	BRCA	c.9689delT	Frameshift	3429	predicted	TIER 1	27	chr13:g.32972339delT	chr13:g.32972336CT>C	BRCA2	LoF	p.L3230Yfs*19	L/.	3230	+	ENST00000380152	3419.0	27
35	Very high	BRCA	c.9155G>A	Missense	3148	predicted	TIER 1	24	chr13:g.32954181G>A	chr13:g.32954181G>A	BRCA2	LoF	p.R3052Q	R/Q	3052	+	ENST00000380152	3419.0	27
35	Very high	BRCA	c.8525G>A	Missense	2844	predicted	TIER 1	20	chr13:g.32945130G>A	chr13:g.32945130G>A	BRCA2	LoF	p.R2842H	R/H	2842	+	ENST00000380152	3419.0	27
35	Very high	BRCA	c.8524C>T	Missense	2843	predicted	TIER 1	20	chr13:g.32945129C>T	chr13:g.32945129C>T	BRCA2	LoF	p.R2842C	R/C	2842	+	ENST00000380152	3419.0	27
35	Very high	BRCA	c.8351G>A	Missense	2758	predicted	TIER 1	19	chr13:g.32944558G>A	chr13:g.32944558G>A	BRCA2	LoF	p.R2784Q	R/Q	2784	+	ENST00000380152	3419.0	27
35	Very high	BRCA	c.8350C>T	Missense	2757	predicted	TIER 1	19	chr13:g.32944557C>T	chr13:g.32944557C>T	BRCA2	LoF	p.R2784W	R/W	2784	+	ENST00000380152	3419.0	27
35	Very high	BRCA	c.6953G>A	Missense	2200	predicted	TIER 1	13	chr13:g.32920979G>A	chr13:g.32920979G>A	BRCA2	LoF	p.R2318Q	R/Q	2318	+	ENST00000380152	3419.0	27
35	Very high	BRCA	c.6644_6647delACTC	Frameshift	2050	predicted	TIER 1	11	chr13:g.32915136_32915139delACTC	chr13:g.32915135TACTC>T	BRCA2	LoF	p.Y2215Sfs*13	Y/.	2215	+	ENST00000380152	3419.0	27
35	Very high	BRCA	c.6466_6469delTCTC	Frameshift	1994	predicted	TIER 1	11	chr13:g.32914958_32914961delTCTC	chr13:g.32914953ATCTC>A	BRCA2	LoF	p.S2156Nfs*11	S/.	2156	+	ENST00000380152	3419.0	27
35	Very high	BRCA	c.6468_6469dupTC	Frameshift	1992	predicted	TIER 1	11	chr13:g.32914960_32914961dupTC	chr13:g.32914953A>ATC	BRCA2	LoF	p.Q2157Lfs*12	Q/.	2157	+	ENST00000380152	3419.0	27
35	Very high	BRCA	c.6399_6401delAAA	InFrameDeletion	1968	predicted	TIER 2	11	chr13:g.32914891_32914893delAAA	chr13:g.32914890CAAA>C	BRCA2	LoF	p.N2135delN	N/-	2135	+	ENST00000380152	3419.0	27
35	Very high	BRCA	c.6082_6086delGAAGA	Frameshift	1874	predicted	TIER 1	11	chr13:g.32914574_32914578delGAAGA	chr13:g.32914569CAAGAG>C	BRCA2	LoF	p.E2028Kfs*19	E/.	2028	+	ENST00000380152	3419.0	27
35	Very high	BRCA	c.6079dupA	Frameshift	1873	predicted	TIER 1	11	chr13:g.32914571dupA	chr13:g.32914569C>CA	BRCA2	LoF	p.R2027Kfs*22	R/.	2027	+	ENST00000380152	3419.0	27
35	Very high	BRCA	c.5799_5800insTTTCTC	InFrameInsertion	1779	predicted	TIER 2	11	chr13:g.32914291_32914292insTTTCTC	chr13:g.32914290A>ACTTTCT	BRCA2	LoF	p.N1933_Q1934insFL	-/FL	1933	+	ENST00000380152	3419.0	27
35	Very high	BRCA	c.5678_5680delGTT	InFrameDeletion	1732	predicted	TIER 2	11	chr13:g.32914170_32914172delGTT	chr13:g.32914166GGTT>G	BRCA2	LoF	p.C1893delC	C/-	1893	+	ENST00000380152	3419.0	27
35	Very high	BRCA	c.5621_5624delTTAA	Frameshift	1701	predicted	TIER 1	11	chr13:g.32914113_32914116delTTAA	chr13:g.32914109GTAAT>G	BRCA2	LoF	p.I1874Rfs*34	I/.	1874	+	ENST00000380152	3419.0	27
35	Very high	BRCA	c.5576_5579delTTAA	Frameshift	1691	predicted	TIER 1	11	chr13:g.32914068_32914071delTTAA	chr13:g.32914065CAATT>C	BRCA2	LoF	p.I1859Kfs*3	I/.	1859	+	ENST00000380152	3419.0	27
35	Very high	BRCA	c.5272_5274delAAT	InFrameDeletion	1611	predicted	TIER 2	11	chr13:g.32913764_32913766delAAT	chr13:g.32913761TATA>T	BRCA2	LoF	p.N1758delN	N/-	1758	+	ENST00000380152	3419.0	27
35	Very high	BRCA	c.5218_5223delTTAAGT	InFrameDeletion	1589	predicted	TIER 2	11	chr13:g.32913710_32913715delTTAAGT	chr13:g.32913708ATTTAAG>A	BRCA2	LoF	p.L1740_S1741delLS	LS/-	1740	+	ENST00000380152	3419.0	27
35	Very high	BRCA	c.5146_5149delTATG	Frameshift	1566	predicted	TIER 1	11	chr13:g.32913638_32913641delTATG	chr13:g.32913635TTGTA>T	BRCA2	LoF	p.Y1716Kfs*8	Y/.	1716	+	ENST00000380152	3419.0	27
35	Very high	BRCA	c.5130_5133delTGTA	Frameshift	1564	predicted	TIER 1	11	chr13:g.32913622_32913625delTGTA	chr13:g.32913619TTATG>T	BRCA2	LoF	p.Y1710*fs*1	Y/.	1710	+	ENST00000380152	3419.0	27
35	Very high	BRCA	c.5110_5113delAGAA	Frameshift	1554	predicted	TIER 1	11	chr13:g.32913602_32913605delAGAA	chr13:g.32913597CAGAA>C	BRCA2	LoF	p.R1704*fs*1	R/.	1704	+	ENST00000380152	3419.0	27
35	Very high	BRCA	c.4821_4822delTG	Frameshift	1472	predicted	TIER 1	11	chr13:g.32913313_32913314delTG	chr13:g.32913312TTG>T	BRCA2	LoF	p.E1608Dfs*6	E/.	1608	+	ENST00000380152	3419.0	27
35	Very high	BRCA	c.4471_4474delCTGA	Frameshift	1352	predicted	TIER 1	11	chr13:g.32912963_32912966delCTGA	chr13:g.32912961TACTG>T	BRCA2	LoF	p.L1491Kfs*12	L/.	1491	+	ENST00000380152	3419.0	27
35	Very high	BRCA	c.3966_3968delCAA	InFrameDeletion	1209	predicted	TIER 2	11	chr13:g.32912458_32912460delCAA	chr13:g.32912455TAAC>T	BRCA2	LoF	p.N1322delN	N/-	1322	+	ENST00000380152	3419.0	27
35	Very high	BRCA	c.3864_3866delTAA	InFrameDeletion	1189	predicted	TIER 2	11	chr13:g.32912356_32912358delTAA	chr13:g.32912350AAAT>A	BRCA2	LoF	p.N1288delN	N/-	1288	+	ENST00000380152	3419.0	27
35	Very high	BRCA	c.3744_3747delTGAG	Frameshift	1158	predicted	TIER 1	11	chr13:g.32912236_32912239delTGAG	chr13:g.32912233TAGTG>T	BRCA2	LoF	p.S1248Rfs*10	S/.	1248	+	ENST00000380152	3419.0	27
35	Very high	BRCA	c.3264dupT	Frameshift	1026	predicted	TIER 1	11	chr13:g.32911756dupT	chr13:g.32911755C>CT	BRCA2	LoF	p.Q1089Sfs*10	Q/.	1089	+	ENST00000380152	3419.0	27
35	Very high	BRCA	c.3167_3170delAAAA	Frameshift	993	predicted	TIER 1	11	chr13:g.32911659_32911662delAAAA	chr13:g.32911658CAAAA>C	BRCA2	LoF	p.Q1056Rfs*3	Q/.	1056	+	ENST00000380152	3419.0	27
35	Very high	BRCA	c.3168_3170delAAA	InFrameDeletion	992	predicted	TIER 2	11	chr13:g.32911660_32911662delAAA	chr13:g.32911658CAAA>C	BRCA2	LoF	p.K1058delK	K/-	1058	+	ENST00000380152	3419.0	27
35	Very high	BRCA	c.2860_2862delGAG	InFrameDeletion	900	predicted	TIER 2	11	chr13:g.32911352_32911354delGAG	chr13:g.32911348AGAG>A	BRCA2	LoF	p.E954delE	E/-	954	+	ENST00000380152	3419.0	27
35	Very high	BRCA	c.2833_2835delAAA	InFrameDeletion	888	predicted	TIER 2	11	chr13:g.32911325_32911327delAAA	chr13:g.32911321TAAA>T	BRCA2	LoF	p.K945delK	K/-	945	+	ENST00000380152	3419.0	27
35	Very high	BRCA	c.2658_2659dupTG	Frameshift	843	predicted	TIER 1	11	chr13:g.32911150_32911151dupTG	chr13:g.32911149A>ATG	BRCA2	LoF	p.E887Vfs*9	E/.	887	+	ENST00000380152	3419.0	27
35	Very high	BRCA	c.2279_2283delTATAT	Frameshift	741	predicted	TIER 1	11	chr13:g.32910771_32910775delTATAT	chr13:g.32910769TTTATA>T	BRCA2	LoF	p.L760*fs*1	L/.	760	+	ENST00000380152	3419.0	27
35	Very high	BRCA	c.1189_1190insTTAG	Frameshift	429	predicted	TIER 1	10	chr13:g.32906804_32906805insTTAG	chr13:g.32906804C>CTTAG	BRCA2	LoF	p.Q397Lfs*25	Q/.	397	+	ENST00000380152	3419.0	27
35	Very high	BRCA	c.771_775delTCAAA	Frameshift	270	predicted	TIER 1	9	chr13:g.32905145_32905149delTCAAA	chr13:g.32905140ACAAAT>A	BRCA2	LoF	p.N257Kfs*17	N/.	257	+	ENST00000380152	3419.0	27
35	Very high	BRCA	c.1921C>T	Nonsense	3959	known	TIER 1	12	chr16:g.68856113C>T	chr16:g.68856113C>T	CDH1	LoF	p.Q641*	Q/*	641	+	ENST00000261769	883.0	16
35	Very high	BRCA	c.1342C>T	Nonsense	2542	predicted	TIER 1	8	chr2:g.202149901C>T	chr2:g.202149901C>T	CASP8	LoF	p.Q448*	Q/*	448	+	ENST00000358485	539.0	9
35	Very high	BRCA	c.817G>T	Nonsense	2338	predicted	TIER 1	6	chr2:g.202139656G>T	chr2:g.202139656G>T	CASP8	LoF	p.E273*	E/*	273	+	ENST00000358485	539.0	9
35	Very high	BRCA	c.509_511delAAG	InFrameDeletion	2173	predicted	TIER 2	3	chr2:g.202136265_202136267delAAG	chr2:g.202136259CAGA>C	CASP8	LoF	p.E170delE	E/-	170	+	ENST00000358485	539.0	9
35	Very high	BRCA	c.497delA	Frameshift	2172	predicted	TIER 1	3	chr2:g.202136253delA	chr2:g.202136252CA>C	CASP8	LoF	p.Q166Rfs*6	Q/.	166	+	ENST00000358485	539.0	9
35	Very high	BRCA	c.2638G>A	Missense	4312	predicted	TIER 1	16	chr16:g.68867391G>A	chr16:g.68867391G>A	CDH1	LoF	p.E880K	E/K	880	+	ENST00000261769	883.0	16
35	Very high	BRCA	c.2603G>A	Missense	4301	predicted	TIER 1	16	chr16:g.68867356G>A	chr16:g.68867356G>A	CDH1	LoF	p.R868H	R/H	868	+	ENST00000261769	883.0	16
35	Very high	BRCA	c.2602C>A	Missense	4300	predicted	TIER 1	16	chr16:g.68867355C>A	chr16:g.68867355C>A	CDH1	LoF	p.R868S	R/S	868	+	ENST00000261769	883.0	16
35	Very high	BRCA	c.2590G>A	Missense	4295	predicted	TIER 1	16	chr16:g.68867343G>A	chr16:g.68867343G>A	CDH1	LoF	p.E864K	E/K	864	+	ENST00000261769	883.0	16
35	Very high	BRCA	c.2481T>G	Nonsense	4263	predicted	TIER 1	16	chr16:g.68867234T>G	chr16:g.68867234T>G	CDH1	LoF	p.Y827*	Y/*	827	+	ENST00000261769	883.0	16
35	Very high	BRCA	c.2399G>A	Missense	4204	predicted	TIER 1	15	chr16:g.68863660G>A	chr16:g.68863660G>A	CDH1	LoF	p.R800H	R/H	800	+	ENST00000261769	883.0	16
35	Very high	BRCA	c.2398C>T	Missense	4203	predicted	TIER 1	15	chr16:g.68863659C>T	chr16:g.68863659C>T	CDH1	LoF	p.R800C	R/C	800	+	ENST00000261769	883.0	16
35	Very high	BRCA	c.2386C>T	Missense	4200	predicted	TIER 1	15	chr16:g.68863647C>T	chr16:g.68863647C>T	CDH1	LoF	p.R796W	R/W	796	+	ENST00000261769	883.0	16
35	Very high	BRCA	c.2350C>T	Missense	4183	predicted	TIER 1	15	chr16:g.68863611C>T	chr16:g.68863611C>T	CDH1	LoF	p.R784C	R/C	784	+	ENST00000261769	883.0	16
35	Very high	BRCA	c.2336G>A	Missense	4177	predicted	TIER 1	15	chr16:g.68863597G>A	chr16:g.68863597G>A	CDH1	LoF	p.R779Q	R/Q	779	+	ENST00000261769	883.0	16
35	Very high	BRCA	c.2281G>A	Missense	4135	predicted	TIER 1	14	chr16:g.68862193G>A	chr16:g.68862193G>A	CDH1	LoF	p.G761R	G/R	761	+	ENST00000261769	883.0	16
35	Very high	BRCA	c.2246G>A	Missense	4125	predicted	TIER 1	14	chr16:g.68862158G>A	chr16:g.68862158G>A	CDH1	LoF	p.R749Q	R/Q	749	+	ENST00000261769	883.0	16
35	Very high	BRCA	c.2245C>T	Missense	4124	predicted	TIER 1	14	chr16:g.68862157C>T	chr16:g.68862157C>T	CDH1	LoF	p.R749W	R/W	749	+	ENST00000261769	883.0	16
35	Very high	BRCA	c.2194C>T	Missense	4105	predicted	TIER 1	14	chr16:g.68862106C>T	chr16:g.68862106C>T	CDH1	LoF	p.R732W	R/W	732	+	ENST00000261769	883.0	16
35	Very high	BRCA	c.1897G>T	Missense	3954	predicted	TIER 1	12	chr16:g.68856089G>T	chr16:g.68856089G>T	CDH1	LoF	p.G633W	G/W	633	+	ENST00000261769	883.0	16
35	Very high	BRCA	c.1004G>A	Missense	3504	predicted	TIER 1	7	chr16:g.68845758G>A	chr16:g.68845758G>A	CDH1	LoF	p.R335Q	R/Q	335	+	ENST00000261769	883.0	16
35	Very high	BRCA	c.44_46delTGC	InFrameDeletion	3058	predicted	TIER 2	1	chr16:g.68771362_68771364delTGC	chr16:g.68771347CGCT>C	CDH1	LoF	p.L15delL	L/-	15	+	ENST00000261769	883.0	16
35	Very high	BRCA	c.41_46dupTGCTGC	InFrameInsertion	3056	predicted	TIER 2	1	chr16:g.68771359_68771364dupTGCTGC	chr16:g.68771347C>CGCTGCT	CDH1	LoF	p.L14_L15dupLL	-/LL	14	+	ENST00000261769	883.0	16
35	Very high	BRCA	c.44_46dupTGC	InFrameInsertion	3055	predicted	TIER 2	1	chr16:g.68771362_68771364dupTGC	chr16:g.68771347C>CGCT	CDH1	LoF	p.L15dupL	-/L	15	+	ENST00000261769	883.0	16
35	Very high	BRCA	c.586C>T	Missense	4701	predicted	TIER 1	2	chr12:g.12871869C>T	chr12:g.12871869C>T	CDKN1B	LoF	p.R196C	R/C	196	+	ENST00000228872	199.0	3
35	Very high	BRCA	c.260_263dupTCTA	Frameshift	4481	predicted	TIER 1	1	chr12:g.12871033_12871036dupTCTA	chr12:g.12871032T>TTCTA	CDKN1B	LoF	p.Y89Lfs*37	Y/.	89	+	ENST00000228872	199.0	3
35	Very high	BRCA	c.45G>A	Nonsense	225	known	TIER 1	1	chr9:g.21974782C>T	chr9:g.21974782C>T	CDKN2A	LoF	p.W15*	W/*	15	-	ENST00000304494	157.0	3
35	Very high	BRCA	c.104G>T	Missense	203	predicted	TIER 1	1	chr9:g.21974723C>A	chr9:g.21974723C>A	CDKN2A	LoF	p.G35V	G/V	35	-	ENST00000304494	157.0	3
35	Very high	BRCA	c.131dupA	Nonsense	194	predicted	TIER 1	1	chr9:g.21974696dupT	chr9:g.21974695G>GT	CDKN2A	LoF	p.Y44*fs*1	Y/.	44	-	ENST00000304494	157.0	3
35	Very high	BRCA	c.253G>A	Missense	13	predicted	TIER 1	2	chr9:g.21971105C>T	chr9:g.21971105C>T	CDKN2A	LoF	p.A85T	A/T	85	-	ENST00000304494	157.0	3
35	Very high	BRCA	c.253G>T	Missense	14	predicted	TIER 1	2	chr9:g.21971105C>A	chr9:g.21971105C>A	CDKN2A	LoF	p.A85S	A/S	85	-	ENST00000304494	157.0	3
35	Very high	BRCA	c.265G>A	Missense	9	predicted	TIER 1	2	chr9:g.21971093C>T	chr9:g.21971093C>T	CDKN2A	LoF	p.G89S	G/S	89	-	ENST00000304494	157.0	3
35	Very high	BRCA	c.4493G>A	Missense	1737	predicted	TIER 1	29	chr17:g.57762475G>A	chr17:g.57762475G>A	CLTC	Act	p.R1498H	R/H	1498	+	ENST00000269122	1676.0	32
35	Very high	BRCA	c.4492C>T	Missense	1736	predicted	TIER 1	29	chr17:g.57762474C>T	chr17:g.57762474C>T	CLTC	Act	p.R1498C	R/C	1498	+	ENST00000269122	1676.0	32
35	Very high	BRCA	c.3301C>T	Missense	1443	predicted	TIER 1	21	chr17:g.57759059C>T	chr17:g.57759059C>T	CLTC	Act	p.R1101C	R/C	1101	+	ENST00000269122	1676.0	32
35	Very high	BRCA	c.3217C>T	Missense	1409	predicted	TIER 1	20	chr17:g.57758807C>T	chr17:g.57758807C>T	CLTC	Act	p.R1073W	R/W	1073	+	ENST00000269122	1676.0	32
35	Very high	BRCA	c.2849G>A	Missense	1293	predicted	TIER 1	18	chr17:g.57756810G>A	chr17:g.57756810G>A	CLTC	Act	p.R950Q	R/Q	950	+	ENST00000269122	1676.0	32
35	Very high	BRCA	c.2026C>T	Missense	1050	predicted	TIER 1	13	chr17:g.57744236C>T	chr17:g.57744236C>T	CLTC	Act	p.R676C	R/C	676	+	ENST00000269122	1676.0	32
35	Very high	BRCA	c.1912C>T	Missense	1013	predicted	TIER 1	12	chr17:g.57743970C>T	chr17:g.57743970C>T	CLTC	Act	p.R638C	R/C	638	+	ENST00000269122	1676.0	32
35	Very high	BRCA	c.1775C>T	Missense	959	predicted	TIER 1	11	chr17:g.57743594C>T	chr17:g.57743594C>T	CLTC	Act	p.A592V	A/V	592	+	ENST00000269122	1676.0	32
35	Very high	BRCA	c.1052G>A	Missense	4686	predicted	TIER 1	4	chr16:g.3843551C>T	chr16:g.3843551C>T	CREBBP	LoF	p.R351H	R/H	351	-	ENST00000262367	2443.0	31
35	Very high	BRCA	c.1109G>A	Missense	4672	predicted	TIER 1	4	chr16:g.3843494C>T	chr16:g.3843494C>T	CREBBP	LoF	p.R370Q	R/Q	370	-	ENST00000262367	2443.0	31
35	Very high	BRCA	c.1109G>T	Missense	4671	predicted	TIER 1	4	chr16:g.3843494C>A	chr16:g.3843494C>A	CREBBP	LoF	p.R370L	R/L	370	-	ENST00000262367	2443.0	31
35	Very high	BRCA	c.1157G>A	Missense	4655	predicted	TIER 1	4	chr16:g.3843446C>T	chr16:g.3843446C>T	CREBBP	LoF	p.R386Q	R/Q	386	-	ENST00000262367	2443.0	31
35	Very high	BRCA	c.1873C>T	Missense	4328	predicted	TIER 1	9	chr16:g.3828769G>A	chr16:g.3828769G>A	CREBBP	LoF	p.R625C	R/C	625	-	ENST00000262367	2443.0	31
35	Very high	BRCA	c.1924G>A	Missense	4322	predicted	TIER 1	9	chr16:g.3828718C>T	chr16:g.3828718C>T	CREBBP	LoF	p.E642K	E/K	642	-	ENST00000262367	2443.0	31
35	Very high	BRCA	c.889C>T	Missense	4729	predicted	TIER 1	7	chr7:g.55221845C>T	chr7:g.55221845C>T	EGFR	Act	p.R297C	R/C	297	+	ENST00000275493	1211.0	28
35	Very high	BRCA	c.4321delG	Frameshift	2833	predicted	TIER 2	24	chr7:g.101892092delG	chr7:g.101892087CG>C	CUX1	ambiguous	p.E1441Rfs*55	E/.	1441	+	ENST00000360264	1517.0	24
35	Very high	BRCA	c.2605_2616delGGAGGTGGCAGC	InFrameDeletion	2237	predicted	TIER 2	18	chr7:g.101845149_101845160delGGAGGTGGCAGC	chr7:g.101845139CGGTGGCAGCGGA>C	CUX1	ambiguous	p.G869_S872delGGGS	GGGS/-	869	+	ENST00000360264	1517.0	24
35	Very high	BRCA	c.1787G>A	Missense	701	predicted	TIER 1	10	chr16:g.67663386G>A	chr16:g.67663386G>A	CTCF	LoF	p.R596H	R/H	596	+	ENST00000264010	728.0	12
35	Very high	BRCA	c.1103G>A	Missense	496	predicted	TIER 1	6	chr16:g.67654616G>A	chr16:g.67654616G>A	CTCF	LoF	p.R368H	R/H	368	+	ENST00000264010	728.0	12
35	Very high	BRCA	c.1021C>T	Missense	452	predicted	TIER 1	5	chr16:g.67650716C>T	chr16:g.67650716C>T	CTCF	LoF	p.R341C	R/C	341	+	ENST00000264010	728.0	12
35	Very high	BRCA	c.1351C>T	Missense	16	known	TIER 1	12	chr7:g.55227884C>T	chr7:g.55227884C>T	EGFR	Act	p.R451C	R/C	451	+	ENST00000275493	1211.0	28
35	Very high	BRCA	c.3409G>A	Missense	1393	predicted	TIER 1	28	chr7:g.55273086G>A	chr7:g.55273086G>A	EGFR	Act	p.E1137K	E/K	1137	+	ENST00000275493	1211.0	28
35	Very high	BRCA	c.3043G>A	Missense	1133	predicted	TIER 1	25	chr7:g.55268977G>A	chr7:g.55268977G>A	EGFR	Act	p.E1015K	E/K	1015	+	ENST00000275493	1211.0	28
35	Very high	BRCA	c.2995C>T	Missense	1111	predicted	TIER 1	25	chr7:g.55268929C>T	chr7:g.55268929C>T	EGFR	Act	p.R999C	R/C	999	+	ENST00000275493	1211.0	28
35	Very high	BRCA	c.2930G>A	Missense	1066	predicted	TIER 1	24	chr7:g.55268090G>A	chr7:g.55268090G>A	EGFR	Act	p.R977H	R/H	977	+	ENST00000275493	1211.0	28
35	Very high	BRCA	c.2918G>A	Missense	1061	predicted	TIER 1	24	chr7:g.55268078G>A	chr7:g.55268078G>A	EGFR	Act	p.R973Q	R/Q	973	+	ENST00000275493	1211.0	28
35	Very high	BRCA	c.2885G>A	Missense	1053	predicted	TIER 1	24	chr7:g.55268045G>A	chr7:g.55268045G>A	EGFR	Act	p.R962H	R/H	962	+	ENST00000275493	1211.0	28
35	Very high	BRCA	c.2884C>T	Missense	1052	predicted	TIER 1	24	chr7:g.55268044C>T	chr7:g.55268044C>T	EGFR	Act	p.R962C	R/C	962	+	ENST00000275493	1211.0	28
35	Very high	BRCA	c.2873G>A	Missense	1045	predicted	TIER 1	24	chr7:g.55268033G>A	chr7:g.55268033G>A	EGFR	Act	p.R958H	R/H	958	+	ENST00000275493	1211.0	28
35	Very high	BRCA	c.2507G>A	Missense	884	predicted	TIER 1	21	chr7:g.55259449G>A	chr7:g.55259449G>A	EGFR	Act	p.R836H	R/H	836	+	ENST00000275493	1211.0	28
35	Very high	BRCA	c.2506C>T	Missense	883	predicted	TIER 1	21	chr7:g.55259448C>T	chr7:g.55259448C>T	EGFR	Act	p.R836C	R/C	836	+	ENST00000275493	1211.0	28
35	Very high	BRCA	c.2039G>A	Missense	592	predicted	TIER 1	17	chr7:g.55240795G>A	chr7:g.55240795G>A	EGFR	Act	p.R680Q	R/Q	680	+	ENST00000275493	1211.0	28
35	Very high	BRCA	c.2029C>T	Missense	586	predicted	TIER 1	17	chr7:g.55240785C>T	chr7:g.55240785C>T	EGFR	Act	p.R677C	R/C	677	+	ENST00000275493	1211.0	28
35	Very high	BRCA	c.2024G>A	Missense	583	predicted	TIER 1	17	chr7:g.55240780G>A	chr7:g.55240780G>A	EGFR	Act	p.R675Q	R/Q	675	+	ENST00000275493	1211.0	28
35	Very high	BRCA	c.2011C>T	Missense	577	predicted	TIER 1	17	chr7:g.55240767C>T	chr7:g.55240767C>T	EGFR	Act	p.R671C	R/C	671	+	ENST00000275493	1211.0	28
35	Very high	BRCA	c.2215C>T	Missense	4837	predicted	TIER 1	14	chr2:g.46609156C>T	chr2:g.46609156C>T	EPAS1	ambiguous	p.R739W	R/W	739	+	ENST00000263734	871.0	16
35	Very high	BRCA	c.922C>T	Missense	4118	predicted	TIER 1	8	chr2:g.46602864C>T	chr2:g.46602864C>T	EPAS1	ambiguous	p.R308W	R/W	308	+	ENST00000263734	871.0	16
35	Very high	BRCA	c.823C>T	Missense	4054	predicted	TIER 1	7	chr2:g.46597009C>T	chr2:g.46597009C>T	EPAS1	ambiguous	p.R275C	R/C	275	+	ENST00000263734	871.0	16
35	Very high	BRCA	c.2647C>T	Missense	1298	predicted	TIER 1	15	chr3:g.89499477C>T	chr3:g.89499477C>T	EPHA3	ambiguous	p.R883W	R/W	883	+	ENST00000336596	984.0	17
35	Very high	BRCA	c.2525G>A	Missense	1264	predicted	TIER 1	15	chr3:g.89499355G>A	chr3:g.89499355G>A	EPHA3	ambiguous	p.R842Q	R/Q	842	+	ENST00000336596	984.0	17
35	Very high	BRCA	c.2515G>A	Missense	1261	predicted	TIER 1	15	chr3:g.89499345G>A	chr3:g.89499345G>A	EPHA3	ambiguous	p.E839K	E/K	839	+	ENST00000336596	984.0	17
35	Very high	BRCA	c.2249G>A	Missense	1156	predicted	TIER 1	13	chr3:g.89480412G>A	chr3:g.89480412G>A	EPHA3	ambiguous	p.R750Q	R/Q	750	+	ENST00000336596	984.0	17
35	Very high	BRCA	c.2234G>A	Missense	1151	predicted	TIER 1	13	chr3:g.89480397G>A	chr3:g.89480397G>A	EPHA3	ambiguous	p.R745Q	R/Q	745	+	ENST00000336596	984.0	17
35	Very high	BRCA	c.2183G>A	Missense	1137	predicted	TIER 1	13	chr3:g.89480346G>A	chr3:g.89480346G>A	EPHA3	ambiguous	p.R728Q	R/Q	728	+	ENST00000336596	984.0	17
35	Very high	BRCA	c.2135G>A	Missense	1084	predicted	TIER 1	12	chr3:g.89478316G>A	chr3:g.89478316G>A	EPHA3	ambiguous	p.R712H	R/H	712	+	ENST00000336596	984.0	17
35	Very high	BRCA	c.2134C>T	Missense	1083	predicted	TIER 1	12	chr3:g.89478315C>T	chr3:g.89478315C>T	EPHA3	ambiguous	p.R712C	R/C	712	+	ENST00000336596	984.0	17
35	Very high	BRCA	c.1564C>T	Missense	742	predicted	TIER 1	7	chr3:g.89448600C>T	chr3:g.89448600C>T	EPHA3	ambiguous	p.R522C	R/C	522	+	ENST00000336596	984.0	17
35	Very high	BRCA	c.2473C>T	Missense	27	predicted	TIER 1	16	chr2:g.46611659C>T	chr2:g.46611659C>T	EPAS1	ambiguous	p.R825W	R/W	825	+	ENST00000263734	871.0	16
35	Very high	BRCA	c.3331C>T	Missense	3142	predicted	TIER 1	26	chr17:g.37883719C>T	chr17:g.37883719C>T	ERBB2	Act	p.R1111W	R/W	1111	+	ENST00000269571	1256.0	27
35	Very high	BRCA	c.3142C>T	Missense	3051	predicted	TIER 1	25	chr17:g.37883239C>T	chr17:g.37883239C>T	ERBB2	Act	p.R1048C	R/C	1048	+	ENST00000269571	1256.0	27
35	Very high	BRCA	c.2953C>T	Missense	2975	predicted	TIER 1	24	chr17:g.37882895C>T	chr17:g.37882895C>T	ERBB2	Act	p.R985C	R/C	985	+	ENST00000269571	1256.0	27
35	Very high	BRCA	c.2908C>T	Missense	2965	predicted	TIER 1	24	chr17:g.37882850C>T	chr17:g.37882850C>T	ERBB2	Act	p.R970W	R/W	970	+	ENST00000269571	1256.0	27
35	Very high	BRCA	c.2897G>A	Missense	2964	predicted	TIER 1	24	chr17:g.37882839G>A	chr17:g.37882839G>A	ERBB2	Act	p.R966Q	R/Q	966	+	ENST00000269571	1256.0	27
35	Very high	BRCA	c.2785C>T	Missense	2904	predicted	TIER 1	23	chr17:g.37882019C>T	chr17:g.37882019C>T	ERBB2	Act	p.R929W	R/W	929	+	ENST00000269571	1256.0	27
35	Very high	BRCA	c.2620G>A	Missense	2824	predicted	TIER 1	21	chr17:g.37881428G>A	chr17:g.37881428G>A	ERBB2	Act	p.E874K	E/K	874	+	ENST00000269571	1256.0	27
35	Very high	BRCA	c.2602C>T	Missense	2818	predicted	TIER 1	21	chr17:g.37881410C>T	chr17:g.37881410C>T	ERBB2	Act	p.R868W	R/W	868	+	ENST00000269571	1256.0	27
35	Very high	BRCA	c.2519G>A	Missense	2796	predicted	TIER 1	21	chr17:g.37881327G>A	chr17:g.37881327G>A	ERBB2	Act	p.R840Q	R/Q	840	+	ENST00000269571	1256.0	27
35	Very high	BRCA	c.2440C>T	Missense	2746	predicted	TIER 1	20	chr17:g.37881111C>T	chr17:g.37881111C>T	ERBB2	Act	p.R814C	R/C	814	+	ENST00000269571	1256.0	27
35	Very high	BRCA	c.2432G>A	Missense	2745	predicted	TIER 1	20	chr17:g.37881103G>A	chr17:g.37881103G>A	ERBB2	Act	p.R811Q	R/Q	811	+	ENST00000269571	1256.0	27
35	Very high	BRCA	c.2431C>T	Missense	2744	predicted	TIER 1	20	chr17:g.37881102C>T	chr17:g.37881102C>T	ERBB2	Act	p.R811W	R/W	811	+	ENST00000269571	1256.0	27
35	Very high	BRCA	c.2351G>A	Missense	2725	predicted	TIER 1	20	chr17:g.37881022G>A	chr17:g.37881022G>A	ERBB2	Act	p.R784H	R/H	784	+	ENST00000269571	1256.0	27
35	Very high	BRCA	c.1607G>A	Missense	2351	predicted	TIER 1	13	chr17:g.37872647G>A	chr17:g.37872647G>A	ERBB2	Act	p.R536Q	R/Q	536	+	ENST00000269571	1256.0	27
35	Very high	BRCA	c.1495C>T	Missense	2297	predicted	TIER 1	12	chr17:g.37872174C>T	chr17:g.37872174C>T	ERBB2	Act	p.R499W	R/W	499	+	ENST00000269571	1256.0	27
35	Very high	BRCA	c.1366C>T	Missense	2261	predicted	TIER 1	12	chr17:g.37872045C>T	chr17:g.37872045C>T	ERBB2	Act	p.R456C	R/C	456	+	ENST00000269571	1256.0	27
35	Very high	BRCA	c.1294C>T	Missense	2197	predicted	TIER 1	11	chr17:g.37871770C>T	chr17:g.37871770C>T	ERBB2	Act	p.R432W	R/W	432	+	ENST00000269571	1256.0	27
35	Very high	BRCA	c.1247C>T	Missense	2186	predicted	TIER 1	11	chr17:g.37871723C>T	chr17:g.37871723C>T	ERBB2	Act	p.P416L	P/L	416	+	ENST00000269571	1256.0	27
35	Very high	BRCA	c.862C>T	Missense	1941	predicted	TIER 1	7	chr17:g.37866695C>T	chr17:g.37866695C>T	ERBB2	Act	p.R288W	R/W	288	+	ENST00000269571	1256.0	27
35	Very high	BRCA	c.676C>T	Missense	1875	predicted	TIER 1	6	chr17:g.37866371C>T	chr17:g.37866371C>T	ERBB2	Act	p.R226C	R/C	226	+	ENST00000269571	1256.0	27
35	Very high	BRCA	c.2921G>A	Missense	4891	predicted	TIER 1	24	chr12:g.56493513G>A	chr12:g.56493513G>A	ERBB3	Act	p.R974Q	R/Q	974	+	ENST00000267101	1343.0	28
35	Very high	BRCA	c.2909G>A	Missense	4889	predicted	TIER 1	24	chr12:g.56493501G>A	chr12:g.56493501G>A	ERBB3	Act	p.R970Q	R/Q	970	+	ENST00000267101	1343.0	28
35	Very high	BRCA	c.2786G>A	Missense	4818	predicted	TIER 1	23	chr12:g.56492636G>A	chr12:g.56492636G>A	ERBB3	Act	p.R929Q	R/Q	929	+	ENST00000267101	1343.0	28
35	Very high	BRCA	c.2785C>T	Missense	4817	predicted	TIER 1	23	chr12:g.56492635C>T	chr12:g.56492635C>T	ERBB3	Act	p.R929W	R/W	929	+	ENST00000267101	1343.0	28
35	Very high	BRCA	c.2513G>A	Missense	4668	predicted	TIER 1	21	chr12:g.56491621G>A	chr12:g.56491621G>A	ERBB3	Act	p.R838Q	R/Q	838	+	ENST00000267101	1343.0	28
35	Very high	BRCA	c.2248C>T	Missense	4551	predicted	TIER 1	19	chr12:g.56490604C>T	chr12:g.56490604C>T	ERBB3	Act	p.R750W	R/W	750	+	ENST00000267101	1343.0	28
35	Very high	BRCA	c.2047C>T	Missense	4433	predicted	TIER 1	17	chr12:g.56489582C>T	chr12:g.56489582C>T	ERBB3	Act	p.R683W	R/W	683	+	ENST00000267101	1343.0	28
35	Very high	BRCA	c.2005C>T	Missense	4422	predicted	TIER 1	17	chr12:g.56489540C>T	chr12:g.56489540C>T	ERBB3	Act	p.R669C	R/C	669	+	ENST00000267101	1343.0	28
35	Very high	BRCA	c.1999C>T	Missense	4420	predicted	TIER 1	17	chr12:g.56489534C>T	chr12:g.56489534C>T	ERBB3	Act	p.R667C	R/C	667	+	ENST00000267101	1343.0	28
35	Very high	BRCA	c.1357C>T	Missense	4065	predicted	TIER 1	12	chr12:g.56487211C>T	chr12:g.56487211C>T	ERBB3	Act	p.R453C	R/C	453	+	ENST00000267101	1343.0	28
35	Very high	BRCA	c.1276C>T	Missense	4044	predicted	TIER 1	12	chr12:g.56487130C>T	chr12:g.56487130C>T	ERBB3	Act	p.R426W	R/W	426	+	ENST00000267101	1343.0	28
35	Very high	BRCA	c.1507C>T	Missense	2985	predicted	TIER 1	9	chr6:g.152415657C>T	chr6:g.152415657C>T	ESR1	Act	p.R503W	R/W	503	+	ENST00000440973	596.0	10
35	Very high	BRCA	c.472C>T	Missense	2609	predicted	TIER 1	4	chr6:g.152163751C>T	chr6:g.152163751C>T	ESR1	Act	p.R158C	R/C	158	+	ENST00000440973	596.0	10
35	Very high	BRCA	c.12607C>T	Missense	4625	predicted	TIER 1	25	chr4:g.187518087G>A	chr4:g.187518087G>A	FAT1	LoF	p.R4203C	R/C	4203	-	ENST00000441802	4589.0	27
35	Very high	BRCA	c.13075C>T	Missense	4451	predicted	TIER 1	26	chr4:g.187516906G>A	chr4:g.187516906G>A	FAT1	LoF	p.R4359W	R/W	4359	-	ENST00000441802	4589.0	27
35	Very high	BRCA	c.13076G>A	Missense	4450	predicted	TIER 1	26	chr4:g.187516905C>T	chr4:g.187516905C>T	FAT1	LoF	p.R4359Q	R/Q	4359	-	ENST00000441802	4589.0	27
35	Very high	BRCA	c.13076G>T	Missense	4449	predicted	TIER 1	26	chr4:g.187516905C>A	chr4:g.187516905C>A	FAT1	LoF	p.R4359L	R/L	4359	-	ENST00000441802	4589.0	27
35	Very high	BRCA	c.308G>A	Missense	2219	predicted	TIER 1	3	chr2:g.212812268C>T	chr2:g.212812268C>T	ERBB4	LoF	p.R103H	R/H	103	-	ENST00000342788	1309.0	28
35	Very high	BRCA	c.317G>A	Missense	2217	predicted	TIER 1	3	chr2:g.212812259C>T	chr2:g.212812259C>T	ERBB4	LoF	p.R106H	R/H	106	-	ENST00000342788	1309.0	28
35	Very high	BRCA	c.916C>T	Missense	1919	predicted	TIER 1	8	chr2:g.212578341G>A	chr2:g.212578341G>A	ERBB4	LoF	p.R306C	R/C	306	-	ENST00000342788	1309.0	28
35	Very high	BRCA	c.2131C>T	Missense	1192	predicted	TIER 1	18	chr2:g.212488718G>A	chr2:g.212488718G>A	ERBB4	LoF	p.R711C	R/C	711	-	ENST00000342788	1309.0	28
35	Very high	BRCA	c.2132G>A	Missense	1191	predicted	TIER 1	18	chr2:g.212488717C>T	chr2:g.212488717C>T	ERBB4	LoF	p.R711H	R/H	711	-	ENST00000342788	1309.0	28
35	Very high	BRCA	c.2539C>T	Missense	983	predicted	TIER 1	21	chr2:g.212295774G>A	chr2:g.212295774G>A	ERBB4	LoF	p.R847C	R/C	847	-	ENST00000342788	1309.0	28
35	Very high	BRCA	c.2540G>A	Missense	982	predicted	TIER 1	21	chr2:g.212295773C>T	chr2:g.212295773C>T	ERBB4	LoF	p.R847H	R/H	847	-	ENST00000342788	1309.0	28
35	Very high	BRCA	c.2813G>A	Missense	864	predicted	TIER 1	23	chr2:g.212288933C>T	chr2:g.212288933C>T	ERBB4	LoF	p.R938H	R/H	938	-	ENST00000342788	1309.0	28
35	Very high	BRCA	c.2948G>T	Missense	805	predicted	TIER 1	24	chr2:g.212286748C>A	chr2:g.212286748C>A	ERBB4	LoF	p.R983I	R/I	983	-	ENST00000342788	1309.0	28
35	Very high	BRCA	c.45_46insCCT	InFrameInsertion	4249	predicted	TIER 2	2	chr4:g.153332912_153332913insGAG	chr4:g.153332910C>CAGG	FBXW7	LoF	p.T15_G16insP	-/P	15	-	ENST00000281708	708.0	12
35	Very high	BRCA	c.289_291delGAA	InFrameDeletion	4194	predicted	TIER 2	2	chr4:g.153332670_153332672delCTT	chr4:g.153332664GTTC>G	FBXW7	LoF	p.E97delE	E/-	97	-	ENST00000281708	708.0	12
35	Very high	BRCA	c.667C>T	Missense	3842	predicted	TIER 1	4	chr4:g.153268141G>A	chr4:g.153268141G>A	FBXW7	LoF	p.R223C	R/C	223	-	ENST00000281708	708.0	12
35	Very high	BRCA	c.668G>A	Missense	3841	predicted	TIER 1	4	chr4:g.153268140C>T	chr4:g.153268140C>T	FBXW7	LoF	p.R223H	R/H	223	-	ENST00000281708	708.0	12
35	Very high	BRCA	c.1393C>T	Missense	3601	predicted	TIER 1	9	chr4:g.153249385G>A	chr4:g.153249385G>A	FBXW7	LoF	p.R465C	R/C	465	-	ENST00000281708	708.0	12
35	Very high	BRCA	c.11203C>T	Missense	2151	predicted	TIER 1	9	chr4:g.126373374C>T	chr4:g.126373374C>T	FAT4	LoF	p.R3735C	R/C	3735	+	ENST00000394329	4982.0	17
35	Very high	BRCA	c.8185A>T	Nonsense	1382	predicted	TIER 1	9	chr4:g.126370356A>T	chr4:g.126370356A>T	FAT4	LoF	p.R2729*	R/*	2729	+	ENST00000394329	4982.0	17
35	Very high	BRCA	c.5468C>T	Missense	454	predicted	TIER 1	3	chr4:g.126328195C>T	chr4:g.126328195C>T	FAT4	LoF	p.S1823L	S/L	1823	+	ENST00000394329	4982.0	17
35	Very high	BRCA	c.5443C>T	Missense	445	predicted	TIER 1	3	chr4:g.126328170C>T	chr4:g.126328170C>T	FAT4	LoF	p.R1815C	R/C	1815	+	ENST00000394329	4982.0	17
35	Very high	BRCA	c.1199G>A	Missense	4949	predicted	TIER 1	9	chr10:g.123274722C>T	chr10:g.123274722C>T	FGFR2	Act	p.R400Q	R/Q	400	-	ENST00000457416	823.0	18
35	Very high	BRCA	c.1295C>T	Missense	4889	predicted	TIER 1	10	chr10:g.123263451G>A	chr10:g.123263451G>A	FGFR2	Act	p.S432L	S/L	432	-	ENST00000457416	823.0	18
35	Very high	BRCA	c.1351C>T	Missense	4869	predicted	TIER 1	10	chr10:g.123263395G>A	chr10:g.123263395G>A	FGFR2	Act	p.R451C	R/C	451	-	ENST00000457416	823.0	18
35	Very high	BRCA	c.1352G>T	Missense	4867	predicted	TIER 1	10	chr10:g.123263394C>A	chr10:g.123263394C>A	FGFR2	Act	p.R451L	R/L	451	-	ENST00000457416	823.0	18
35	Very high	BRCA	c.1426G>A	Missense	4850	predicted	TIER 1	10	chr10:g.123263320C>T	chr10:g.123263320C>T	FGFR2	Act	p.E476K	E/K	476	-	ENST00000457416	823.0	18
35	Very high	BRCA	c.1750G>A	Missense	4690	predicted	TIER 1	13	chr10:g.123256162C>T	chr10:g.123256162C>T	FGFR2	Act	p.G584R	G/R	584	-	ENST00000457416	823.0	18
35	Very high	BRCA	c.2279G>A	Missense	4455	predicted	TIER 1	17	chr10:g.123243237C>T	chr10:g.123243237C>T	FGFR2	Act	p.R760Q	R/Q	760	-	ENST00000457416	823.0	18
35	Very high	BRCA	c.997C>T	Missense	3934	predicted	TIER 1	12	chr20:g.57485415C>T	chr20:g.57485415C>T	GNAS	Act	p.R333C	R/C	333	+	ENST00000371085	395.0	13
35	Very high	BRCA	c.949C>T	Missense	3889	predicted	TIER 1	11	chr20:g.57485115C>T	chr20:g.57485115C>T	GNAS	Act	p.R317C	R/C	317	+	ENST00000371085	395.0	13
35	Very high	BRCA	c.596G>A	Missense	3752	predicted	TIER 1	8	chr20:g.57484415G>A	chr20:g.57484415G>A	GNAS	Act	p.R199H	R/H	199	+	ENST00000371085	395.0	13
35	Very high	BRCA	c.864C>A	Nonsense	1942	predicted	TIER 1	4	chr10:g.8106041C>A	chr10:g.8106041C>A	GATA3	LoF	p.C288*	C/*	288	+	ENST00000379328	445.0	6
35	Very high	BRCA	c.532C>T	Missense	385	predicted	TIER 1	5	chr10:g.123310896G>A	chr10:g.123310896G>A	FGFR2	Act	p.R178C	R/C	178	-	ENST00000457416	823.0	18
35	Very high	BRCA	c.533G>A	Missense	384	predicted	TIER 1	5	chr10:g.123310895C>T	chr10:g.123310895C>T	FGFR2	Act	p.R178H	R/H	178	-	ENST00000457416	823.0	18
35	Very high	BRCA	c.608G>A	Missense	359	predicted	TIER 1	5	chr10:g.123310820C>T	chr10:g.123310820C>T	FGFR2	Act	p.R203H	R/H	203	-	ENST00000457416	823.0	18
35	Very high	BRCA	c.892G>A	Missense	160	predicted	TIER 1	7	chr10:g.123279540C>T	chr10:g.123279540C>T	FGFR2	Act	p.G298S	G/S	298	-	ENST00000457416	823.0	18
35	Very high	BRCA	c.2764C>T	Missense	4857	predicted	TIER 1	21	chr9:g.5090448C>T	chr9:g.5090448C>T	JAK2	Act	p.R922W	R/W	922	+	ENST00000381652	1133.0	25
35	Very high	BRCA	c.2600G>A	Missense	4789	predicted	TIER 1	20	chr9:g.5089702G>A	chr9:g.5089702G>A	JAK2	Act	p.R867Q	R/Q	867	+	ENST00000381652	1133.0	25
35	Very high	BRCA	c.2599C>T	Missense	4788	predicted	TIER 1	20	chr9:g.5089701C>T	chr9:g.5089701C>T	JAK2	Act	p.R867W	R/W	867	+	ENST00000381652	1133.0	25
35	Very high	BRCA	c.397C>T	Missense	3756	predicted	TIER 1	5	chr9:g.5044449C>T	chr9:g.5044449C>T	JAK2	Act	p.R133W	R/W	133	+	ENST00000381652	1133.0	25
35	Very high	BRCA	c.3964C>T	Missense	3182	predicted	TIER 1	27	chrX:g.44966740C>T	chrX:g.44966740C>T	KDM6A	LoF	p.R1322W	R/W	1322	+	ENST00000377967	1402.0	29
35	Very high	BRCA	c.12416G>A	Missense	4811	predicted	TIER 1	49	chr7:g.151849900C>T	chr7:g.151849900C>T	MLL3	LoF	p.R4139Q	R/Q	4139	-	ENST00000262189	4912.0	59
35	Very high	BRCA	c.14018G>A	Missense	4345	predicted	TIER 1	53	chr7:g.151843697C>T	chr7:g.151843697C>T	MLL3	LoF	p.R4673H	R/H	4673	-	ENST00000262189	4912.0	59
35	Very high	BRCA	c.14074G>A	Missense	4298	predicted	TIER 1	54	chr7:g.151842338C>T	chr7:g.151842338C>T	MLL3	LoF	p.G4692S	G/S	4692	-	ENST00000262189	4912.0	59
35	Very high	BRCA	c.14078G>A	Missense	4297	predicted	TIER 1	54	chr7:g.151842334C>T	chr7:g.151842334C>T	MLL3	LoF	p.R4693Q	R/Q	4693	-	ENST00000262189	4912.0	59
35	Very high	BRCA	c.14128delC	Frameshift	4285	predicted	TIER 1	54	chr7:g.151842286delG	chr7:g.151842283CG>C	MLL3	LoF	p.R4710Vfs*6	R/.	4710	-	ENST00000262189	4912.0	59
35	Very high	BRCA	c.14288G>A	Missense	4227	predicted	TIER 1	55	chr7:g.151841853C>T	chr7:g.151841853C>T	MLL3	LoF	p.R4763Q	R/Q	4763	-	ENST00000262189	4912.0	59
35	Very high	BRCA	c.14330G>A	Missense	4217	predicted	TIER 1	55	chr7:g.151841811C>T	chr7:g.151841811C>T	MLL3	LoF	p.R4777Q	R/Q	4777	-	ENST00000262189	4912.0	59
35	Very high	BRCA	c.14336G>A	Missense	4216	predicted	TIER 1	55	chr7:g.151841805C>T	chr7:g.151841805C>T	MLL3	LoF	p.R4779Q	R/Q	4779	-	ENST00000262189	4912.0	59
35	Very high	BRCA	c.14465G>A	Missense	4124	predicted	TIER 1	57	chr7:g.151836340C>T	chr7:g.151836340C>T	MLL3	LoF	p.R4822H	R/H	4822	-	ENST00000262189	4912.0	59
35	Very high	BRCA	c.14483G>A	Missense	4120	predicted	TIER 1	57	chr7:g.151836322C>T	chr7:g.151836322C>T	MLL3	LoF	p.R4828H	R/H	4828	-	ENST00000262189	4912.0	59
35	Very high	BRCA	c.14530G>A	Missense	4106	predicted	TIER 1	57	chr7:g.151836275C>T	chr7:g.151836275C>T	MLL3	LoF	p.A4844T	A/T	4844	-	ENST00000262189	4912.0	59
35	Very high	BRCA	c.14621G>A	Missense	4044	predicted	TIER 1	58	chr7:g.151835903C>T	chr7:g.151835903C>T	MLL3	LoF	p.R4874Q	R/Q	4874	-	ENST00000262189	4912.0	59
35	Very high	BRCA	c.3409C>T	Missense	1294	predicted	TIER 1	17	chr10:g.76784752C>T	chr10:g.76784752C>T	KAT6B	Act	p.R1137C	R/C	1137	+	ENST00000287239	2074.0	18
35	Very high	BRCA	c.2611C>T	Missense	978	predicted	TIER 1	13	chr10:g.76748852C>T	chr10:g.76748852C>T	KAT6B	Act	p.R871W	R/W	871	+	ENST00000287239	2074.0	18
35	Very high	BRCA	c.2207C>T	Missense	820	predicted	TIER 1	10	chr10:g.76739073C>T	chr10:g.76739073C>T	KAT6B	Act	p.S736L	S/L	736	+	ENST00000287239	2074.0	18
35	Very high	BRCA	c.679C>T	Missense	360	predicted	TIER 1	4	chr10:g.76719785C>T	chr10:g.76719785C>T	KAT6B	Act	p.R227C	R/C	227	+	ENST00000287239	2074.0	18
35	Very high	BRCA	c.679C>A	Missense	359	predicted	TIER 1	4	chr10:g.76719785C>A	chr10:g.76719785C>A	KAT6B	Act	p.R227S	R/S	227	+	ENST00000287239	2074.0	18
35	Very high	BRCA	c.5611C>T	Missense	4658	predicted	TIER 1	34	chr2:g.141528465G>A	chr2:g.141528465G>A	LRP1B	LoF	p.R1871C	R/C	1871	-	ENST00000389484	4600.0	91
35	Very high	BRCA	c.5740G>A	Missense	4590	predicted	TIER 1	35	chr2:g.141526800C>T	chr2:g.141526800C>T	LRP1B	LoF	p.G1914R	G/R	1914	-	ENST00000389484	4600.0	91
35	Very high	BRCA	c.5960G>A	Missense	4482	predicted	TIER 1	37	chr2:g.141473605C>T	chr2:g.141473605C>T	LRP1B	LoF	p.R1987H	R/H	1987	-	ENST00000389484	4600.0	91
35	Very high	BRCA	c.7732G>A	Missense	3645	predicted	TIER 1	47	chr2:g.141291620C>T	chr2:g.141291620C>T	LRP1B	LoF	p.G2578R	G/R	2578	-	ENST00000389484	4600.0	91
35	Very high	BRCA	c.8374G>A	Missense	3281	predicted	TIER 1	52	chr2:g.141267521C>T	chr2:g.141267521C>T	LRP1B	LoF	p.D2792N	D/N	2792	-	ENST00000389484	4600.0	91
35	Very high	BRCA	c.8887G>A	Missense	2997	predicted	TIER 1	56	chr2:g.141253281C>T	chr2:g.141253281C>T	LRP1B	LoF	p.G2963S	G/S	2963	-	ENST00000389484	4600.0	91
35	Very high	BRCA	c.9469C>T	Missense	2699	predicted	TIER 1	60	chr2:g.141232863G>A	chr2:g.141232863G>A	LRP1B	LoF	p.R3157C	R/C	3157	-	ENST00000389484	4600.0	91
35	Very high	BRCA	c.10912C>T	Missense	2086	predicted	TIER 1	71	chr2:g.141128375G>A	chr2:g.141128375G>A	LRP1B	LoF	p.R3638W	R/W	3638	-	ENST00000389484	4600.0	91
35	Very high	BRCA	c.12496C>T	Missense	1386	predicted	TIER 1	81	chr2:g.141081480G>A	chr2:g.141081480G>A	LRP1B	LoF	p.R4166C	R/C	4166	-	ENST00000389484	4600.0	91
35	Very high	BRCA	c.391_393dupGAA	InFrameInsertion	217	predicted	TIER 2	3	chr12:g.49448319_49448321dupTCT	chr12:g.49448317G>GTTC	MLL2	LoF	p.E131dupE	-/E	131	-	ENST00000301067	5538.0	54
35	Very high	BRCA	c.4063C>T	Missense	4187	predicted	TIER 1	17	chr5:g.56181839C>T	chr5:g.56181839C>T	MAP3K1	LoF	p.R1355C	R/C	1355	+	ENST00000399503	1513.0	20
35	Very high	BRCA	c.2817_2825delTAGTTCAAC	InFrameDeletion	3775	predicted	TIER 2	14	chr5:g.56177844_56177852delTAGTTCAAC	chr5:g.56177842TCTAGTTCAA>T	MAP3K1	LoF	p.S940_T942delSST	SST/-	940	+	ENST00000399503	1513.0	20
35	Very high	BRCA	c.2608C>T	Nonsense	3718	predicted	TIER 1	14	chr5:g.56177635C>T	chr5:g.56177635C>T	MAP3K1	LoF	p.Q870*	Q/*	870	+	ENST00000399503	1513.0	20
35	Very high	BRCA	c.2089C>T	Missense	3545	predicted	TIER 1	12	chr5:g.56176539C>T	chr5:g.56176539C>T	MAP3K1	LoF	p.R697C	R/C	697	+	ENST00000399503	1513.0	20
35	Very high	BRCA	c.1240C>T	Missense	3179	predicted	TIER 1	6	chr5:g.56161743C>T	chr5:g.56161743C>T	MAP3K1	LoF	p.R414C	R/C	414	+	ENST00000399503	1513.0	20
35	Very high	BRCA	c.1090C>T	Missense	3124	predicted	TIER 1	5	chr5:g.56161221C>T	chr5:g.56161221C>T	MAP3K1	LoF	p.R364W	R/W	364	+	ENST00000399503	1513.0	20
35	Very high	BRCA	c.1015C>T	Missense	3071	predicted	TIER 1	4	chr5:g.56160741C>T	chr5:g.56160741C>T	MAP3K1	LoF	p.R339W	R/W	339	+	ENST00000399503	1513.0	20
35	Very high	BRCA	c.535C>T	Missense	2887	predicted	TIER 1	2	chr5:g.56152479C>T	chr5:g.56152479C>T	MAP3K1	LoF	p.R179C	R/C	179	+	ENST00000399503	1513.0	20
35	Very high	BRCA	c.484C>T	Missense	2875	predicted	TIER 1	2	chr5:g.56152428C>T	chr5:g.56152428C>T	MAP3K1	LoF	p.R162C	R/C	162	+	ENST00000399503	1513.0	20
35	Very high	BRCA	c.179_181delGGC	InFrameDeletion	2767	predicted	TIER 2	1	chr5:g.56111579_56111581delGGC	chr5:g.56111569TGGC>T	MAP3K1	LoF	p.R60delR	R/-	60	+	ENST00000399503	1513.0	20
35	Very high	BRCA	c.179_181dupGGC	InFrameInsertion	2766	predicted	TIER 2	1	chr5:g.56111579_56111581dupGGC	chr5:g.56111569T>TGGC	MAP3K1	LoF	p.R60dupR	-/R	60	+	ENST00000399503	1513.0	20
35	Very high	BRCA	c.2551C>T	Missense	973	predicted	TIER 1	16	chr2:g.141751657G>A	chr2:g.141751657G>A	LRP1B	LoF	p.R851C	R/C	851	-	ENST00000389484	4600.0	91
35	Very high	BRCA	c.2689C>T	Missense	886	predicted	TIER 1	17	chr2:g.141747182G>A	chr2:g.141747182G>A	LRP1B	LoF	p.R897C	R/C	897	-	ENST00000389484	4600.0	91
35	Very high	BRCA	c.2690G>A	Missense	885	predicted	TIER 1	17	chr2:g.141747181C>T	chr2:g.141747181C>T	LRP1B	LoF	p.R897H	R/H	897	-	ENST00000389484	4600.0	91
35	Very high	BRCA	c.2812C>T	Missense	820	predicted	TIER 1	18	chr2:g.141739804G>A	chr2:g.141739804G>A	LRP1B	LoF	p.R938C	R/C	938	-	ENST00000389484	4600.0	91
35	Very high	BRCA	c.2962G>A	Missense	737	predicted	TIER 1	19	chr2:g.141709435C>T	chr2:g.141709435C>T	LRP1B	LoF	p.D988N	D/N	988	-	ENST00000389484	4600.0	91
35	Very high	BRCA	c.5308C>T	Missense	4995	predicted	TIER 1	38	chr22:g.36681342G>A	chr22:g.36681342G>A	MYH9	Act	p.R1770C	R/C	1770	-	ENST00000216181	1961.0	41
35	Very high	BRCA	c.5309G>A	Missense	4994	predicted	TIER 1	38	chr22:g.36681341C>T	chr22:g.36681341C>T	MYH9	Act	p.R1770H	R/H	1770	-	ENST00000216181	1961.0	41
35	Very high	BRCA	c.5309G>T	Missense	4993	predicted	TIER 1	38	chr22:g.36681341C>A	chr22:g.36681341C>A	MYH9	Act	p.R1770L	R/L	1770	-	ENST00000216181	1961.0	41
35	Very high	BRCA	c.5339G>A	Missense	4982	predicted	TIER 1	38	chr22:g.36681311C>T	chr22:g.36681311C>T	MYH9	Act	p.R1780Q	R/Q	1780	-	ENST00000216181	1961.0	41
35	Very high	BRCA	c.5353C>T	Missense	4979	predicted	TIER 1	38	chr22:g.36681297G>A	chr22:g.36681297G>A	MYH9	Act	p.R1785C	R/C	1785	-	ENST00000216181	1961.0	41
35	Very high	BRCA	c.5354G>A	Missense	4978	predicted	TIER 1	38	chr22:g.36681296C>T	chr22:g.36681296C>T	MYH9	Act	p.R1785H	R/H	1785	-	ENST00000216181	1961.0	41
35	Very high	BRCA	c.5489G>T	Missense	4891	predicted	TIER 1	39	chr22:g.36680552C>A	chr22:g.36680552C>A	MYH9	Act	p.R1830L	R/L	1830	-	ENST00000216181	1961.0	41
35	Very high	BRCA	c.5560G>A	Missense	4872	predicted	TIER 1	39	chr22:g.36680481C>T	chr22:g.36680481C>T	MYH9	Act	p.E1854K	E/K	1854	-	ENST00000216181	1961.0	41
35	Very high	BRCA	c.5575G>A	Missense	4865	predicted	TIER 1	39	chr22:g.36680466C>T	chr22:g.36680466C>T	MYH9	Act	p.E1859K	E/K	1859	-	ENST00000216181	1961.0	41
35	Very high	BRCA	c.5612G>A	Missense	4813	predicted	TIER 1	40	chr22:g.36680292C>T	chr22:g.36680292C>T	MYH9	Act	p.R1871H	R/H	1871	-	ENST00000216181	1961.0	41
35	Very high	BRCA	c.5629C>T	Missense	4812	predicted	TIER 1	40	chr22:g.36680275G>A	chr22:g.36680275G>A	MYH9	Act	p.R1877W	R/W	1877	-	ENST00000216181	1961.0	41
35	Very high	BRCA	c.5630G>A	Missense	4811	predicted	TIER 1	40	chr22:g.36680274C>T	chr22:g.36680274C>T	MYH9	Act	p.R1877Q	R/Q	1877	-	ENST00000216181	1961.0	41
35	Very high	BRCA	c.5647G>A	Missense	4806	predicted	TIER 1	40	chr22:g.36680257C>T	chr22:g.36680257C>T	MYH9	Act	p.E1883K	E/K	1883	-	ENST00000216181	1961.0	41
35	Very high	BRCA	c.5663G>A	Missense	4801	predicted	TIER 1	40	chr22:g.36680241C>T	chr22:g.36680241C>T	MYH9	Act	p.R1888Q	R/Q	1888	-	ENST00000216181	1961.0	41
35	Very high	BRCA	c.5681G>A	Missense	4796	predicted	TIER 1	40	chr22:g.36680223C>T	chr22:g.36680223C>T	MYH9	Act	p.R1894Q	R/Q	1894	-	ENST00000216181	1961.0	41
35	Very high	BRCA	c.5695G>A	Missense	4792	predicted	TIER 1	40	chr22:g.36680209C>T	chr22:g.36680209C>T	MYH9	Act	p.E1899K	E/K	1899	-	ENST00000216181	1961.0	41
35	Very high	BRCA	c.94C>T	Missense	4619	predicted	TIER 1	2	chr1:g.11319373G>A	chr1:g.11319373G>A	MTOR	Act	p.R32W	R/W	32	-	ENST00000361445	2550.0	58
35	Very high	BRCA	c.1855C>T	Missense	3947	predicted	TIER 1	12	chr1:g.11298606G>A	chr1:g.11298606G>A	MTOR	Act	p.R619C	R/C	619	-	ENST00000361445	2550.0	58
35	Very high	BRCA	c.1856G>T	Missense	3946	predicted	TIER 1	12	chr1:g.11298605C>A	chr1:g.11298605C>A	MTOR	Act	p.R619L	R/L	619	-	ENST00000361445	2550.0	58
35	Very high	BRCA	c.2263C>T	Missense	3810	predicted	TIER 1	14	chr1:g.11294268G>A	chr1:g.11294268G>A	MTOR	Act	p.R755C	R/C	755	-	ENST00000361445	2550.0	58
35	Very high	BRCA	c.2305C>T	Missense	3797	predicted	TIER 1	14	chr1:g.11294226G>A	chr1:g.11294226G>A	MTOR	Act	p.R769C	R/C	769	-	ENST00000361445	2550.0	58
35	Very high	BRCA	c.2642G>A	Missense	3629	predicted	TIER 1	17	chr1:g.11291364C>T	chr1:g.11291364C>T	MTOR	Act	p.R881H	R/H	881	-	ENST00000361445	2550.0	58
35	Very high	BRCA	c.2657G>A	Missense	3584	predicted	TIER 1	18	chr1:g.11291104C>T	chr1:g.11291104C>T	MTOR	Act	p.R886H	R/H	886	-	ENST00000361445	2550.0	58
35	Very high	BRCA	c.2870G>A	Missense	3502	predicted	TIER 1	19	chr1:g.11288885C>T	chr1:g.11288885C>T	MTOR	Act	p.R957Q	R/Q	957	-	ENST00000361445	2550.0	58
35	Very high	BRCA	c.3025C>T	Missense	3470	predicted	TIER 1	19	chr1:g.11288730G>A	chr1:g.11288730G>A	MTOR	Act	p.R1009W	R/W	1009	-	ENST00000361445	2550.0	58
35	Very high	BRCA	c.3269G>A	Missense	3370	predicted	TIER 1	21	chr1:g.11273472C>T	chr1:g.11273472C>T	MTOR	Act	p.R1090H	R/H	1090	-	ENST00000361445	2550.0	58
35	Very high	BRCA	c.3269G>C	Missense	3371	predicted	TIER 1	21	chr1:g.11273472C>G	chr1:g.11273472C>G	MTOR	Act	p.R1090P	R/P	1090	-	ENST00000361445	2550.0	58
35	Very high	BRCA	c.3460C>T	Missense	3265	predicted	TIER 1	23	chr1:g.11272470G>A	chr1:g.11272470G>A	MTOR	Act	p.R1154W	R/W	1154	-	ENST00000361445	2550.0	58
35	Very high	BRCA	c.3461G>A	Missense	3264	predicted	TIER 1	23	chr1:g.11272469C>T	chr1:g.11272469C>T	MTOR	Act	p.R1154Q	R/Q	1154	-	ENST00000361445	2550.0	58
35	Very high	BRCA	c.3482G>A	Missense	3255	predicted	TIER 1	23	chr1:g.11272448C>T	chr1:g.11272448C>T	MTOR	Act	p.R1161Q	R/Q	1161	-	ENST00000361445	2550.0	58
35	Very high	BRCA	c.3509G>A	Missense	3252	predicted	TIER 1	23	chr1:g.11272421C>T	chr1:g.11272421C>T	MTOR	Act	p.R1170H	R/H	1170	-	ENST00000361445	2550.0	58
35	Very high	BRCA	c.4438C>T	Missense	2867	predicted	TIER 1	30	chr1:g.11217240G>A	chr1:g.11217240G>A	MTOR	Act	p.R1480C	R/C	1480	-	ENST00000361445	2550.0	58
35	Very high	BRCA	c.4445G>A	Missense	2863	predicted	TIER 1	30	chr1:g.11217233C>T	chr1:g.11217233C>T	MTOR	Act	p.R1482H	R/H	1482	-	ENST00000361445	2550.0	58
35	Very high	BRCA	c.4612C>T	Missense	2769	predicted	TIER 1	32	chr1:g.11206807G>A	chr1:g.11206807G>A	MTOR	Act	p.R1538W	R/W	1538	-	ENST00000361445	2550.0	58
35	Very high	BRCA	c.4678G>A	Missense	2760	predicted	TIER 1	32	chr1:g.11206741C>T	chr1:g.11206741C>T	MTOR	Act	p.A1560T	A/T	1560	-	ENST00000361445	2550.0	58
35	Very high	BRCA	c.4792G>A	Missense	2685	predicted	TIER 1	34	chr1:g.11204785C>T	chr1:g.11204785C>T	MTOR	Act	p.E1598K	E/K	1598	-	ENST00000361445	2550.0	58
35	Very high	BRCA	c.4828G>A	Missense	2675	predicted	TIER 1	34	chr1:g.11204749C>T	chr1:g.11204749C>T	MTOR	Act	p.E1610K	E/K	1610	-	ENST00000361445	2550.0	58
35	Very high	BRCA	c.4846C>T	Missense	2670	predicted	TIER 1	34	chr1:g.11204731G>A	chr1:g.11204731G>A	MTOR	Act	p.R1616C	R/C	1616	-	ENST00000361445	2550.0	58
35	Very high	BRCA	c.4847G>A	Missense	2669	predicted	TIER 1	34	chr1:g.11204730C>T	chr1:g.11204730C>T	MTOR	Act	p.R1616H	R/H	1616	-	ENST00000361445	2550.0	58
35	Very high	BRCA	c.4882C>T	Missense	2629	predicted	TIER 1	35	chr1:g.11199706G>A	chr1:g.11199706G>A	MTOR	Act	p.R1628C	R/C	1628	-	ENST00000361445	2550.0	58
35	Very high	BRCA	c.5347G>A	Missense	2421	predicted	TIER 1	38	chr1:g.11193154C>T	chr1:g.11193154C>T	MTOR	Act	p.D1783N	D/N	1783	-	ENST00000361445	2550.0	58
35	Very high	BRCA	c.5668C>T	Missense	2253	predicted	TIER 1	40	chr1:g.11189841G>A	chr1:g.11189841G>A	MTOR	Act	p.R1890C	R/C	1890	-	ENST00000361445	2550.0	58
35	Very high	BRCA	c.5863C>T	Missense	2168	predicted	TIER 1	42	chr1:g.11188558G>A	chr1:g.11188558G>A	MTOR	Act	p.R1955C	R/C	1955	-	ENST00000361445	2550.0	58
35	Very high	BRCA	c.5864G>A	Missense	2167	predicted	TIER 1	42	chr1:g.11188557C>T	chr1:g.11188557C>T	MTOR	Act	p.R1955H	R/H	1955	-	ENST00000361445	2550.0	58
35	Very high	BRCA	c.5896C>T	Missense	2161	predicted	TIER 1	42	chr1:g.11188525G>A	chr1:g.11188525G>A	MTOR	Act	p.R1966W	R/W	1966	-	ENST00000361445	2550.0	58
35	Very high	BRCA	c.5959C>T	Missense	2119	predicted	TIER 1	43	chr1:g.11188135G>A	chr1:g.11188135G>A	MTOR	Act	p.R1987W	R/W	1987	-	ENST00000361445	2550.0	58
35	Very high	BRCA	c.6178C>T	Missense	2066	predicted	TIER 1	44	chr1:g.11187719G>A	chr1:g.11187719G>A	MTOR	Act	p.R2060W	R/W	2060	-	ENST00000361445	2550.0	58
35	Very high	BRCA	c.6329G>T	Missense	2012	predicted	TIER 1	45	chr1:g.11187089C>A	chr1:g.11187089C>A	MTOR	Act	p.R2110L	R/L	2110	-	ENST00000361445	2550.0	58
35	Very high	BRCA	c.6508C>T	Missense	1951	predicted	TIER 1	46	chr1:g.11186697G>A	chr1:g.11186697G>A	MTOR	Act	p.R2170W	R/W	2170	-	ENST00000361445	2550.0	58
35	Very high	BRCA	c.6797G>C	Missense	1836	predicted	TIER 1	48	chr1:g.11182049C>G	chr1:g.11182049C>G	MTOR	Act	p.R2266P	R/P	2266	-	ENST00000361445	2550.0	58
35	Very high	BRCA	c.6892G>A	Missense	1785	predicted	TIER 1	49	chr1:g.11181344C>T	chr1:g.11181344C>T	MTOR	Act	p.D2298N	D/N	2298	-	ENST00000361445	2550.0	58
35	Very high	BRCA	c.6947G>A	Missense	1753	predicted	TIER 1	50	chr1:g.11177130C>T	chr1:g.11177130C>T	MTOR	Act	p.R2316Q	R/Q	2316	-	ENST00000361445	2550.0	58
35	Very high	BRCA	c.6964C>T	Missense	1752	predicted	TIER 1	50	chr1:g.11177113G>A	chr1:g.11177113G>A	MTOR	Act	p.R2322C	R/C	2322	-	ENST00000361445	2550.0	58
35	Very high	BRCA	c.6965G>A	Missense	1751	predicted	TIER 1	50	chr1:g.11177112C>T	chr1:g.11177112C>T	MTOR	Act	p.R2322H	R/H	2322	-	ENST00000361445	2550.0	58
35	Very high	BRCA	c.7223G>A	Missense	1623	predicted	TIER 1	53	chr1:g.11174452C>T	chr1:g.11174452C>T	MTOR	Act	p.R2408Q	R/Q	2408	-	ENST00000361445	2550.0	58
35	Very high	BRCA	c.1370G>A	Missense	826	predicted	TIER 1	10	chr11:g.64572284C>T	chr11:g.64572284C>T	MEN1	LoF	p.R457Q	R/Q	457	-	ENST00000443283	616.0	10
35	Very high	BRCA	c.4831C>T	Missense	4862	predicted	TIER 1	36	chr17:g.29592353C>T	chr17:g.29592353C>T	NF1	LoF	p.R1611W	R/W	1611	+	ENST00000358273	2840.0	58
35	Very high	BRCA	c.4085G>A	Missense	4582	predicted	TIER 1	30	chr17:g.29576112G>A	chr17:g.29576112G>A	NF1	LoF	p.R1362Q	R/Q	1362	+	ENST00000358273	2840.0	58
35	Very high	BRCA	c.2293C>T	Missense	3921	predicted	TIER 1	19	chr17:g.29554277C>T	chr17:g.29554277C>T	NF1	LoF	p.R765C	R/C	765	+	ENST00000358273	2840.0	58
35	Very high	BRCA	c.499_502delTGTT	Frameshift	3163	predicted	TIER 1	5	chr17:g.29496928_29496931delTGTT	chr17:g.29496923CTGTT>C	NF1	LoF	p.C167Qfs*10	C/.	167	+	ENST00000358273	2840.0	58
35	Very high	BRCA	c.466C>T	Missense	3134	predicted	TIER 1	4	chr17:g.29490381C>T	chr17:g.29490381C>T	NF1	LoF	p.R156C	R/C	156	+	ENST00000358273	2840.0	58
35	Very high	BRCA	c.2519_2533delGGGAGGAGCAGAAGC	MultiAAMissense	1246	predicted	TIER 1	20	chr12:g.124856842_124856856delGCTTCTGCTCCTCCC	chr12:g.124856841GGCTTCTGCTCCTCCC>G	NCOR2	Act	p.G840_P845delinsA	insA/-	840	-	ENST00000405201	2515.0	47
35	Very high	BRCA	c.2746G>A	Missense	1150	predicted	TIER 1	20	chr12:g.124856629C>T	chr12:g.124856629C>T	NCOR2	Act	p.D916N	D/N	916	-	ENST00000405201	2515.0	47
35	Very high	BRCA	c.3677G>A	Missense	661	predicted	TIER 1	27	chr12:g.124838655C>T	chr12:g.124838655C>T	NCOR2	Act	p.R1226H	R/H	1226	-	ENST00000405201	2515.0	47
35	Very high	BRCA	c.3679G>T	Missense	659	predicted	TIER 1	27	chr12:g.124838653C>A	chr12:g.124838653C>A	NCOR2	Act	p.G1227C	G/C	1227	-	ENST00000405201	2515.0	47
35	Very high	BRCA	c.3745G>A	Missense	580	predicted	TIER 1	28	chr12:g.124835232C>T	chr12:g.124835232C>T	NCOR2	Act	p.E1249K	E/K	1249	-	ENST00000405201	2515.0	47
35	Very high	BRCA	c.3811G>A	Missense	549	predicted	TIER 1	28	chr12:g.124835166C>T	chr12:g.124835166C>T	NCOR2	Act	p.E1271K	E/K	1271	-	ENST00000405201	2515.0	47
35	Very high	BRCA	c.3998G>A	Missense	400	predicted	TIER 1	30	chr12:g.124832445C>T	chr12:g.124832445C>T	NCOR2	Act	p.R1333H	R/H	1333	-	ENST00000405201	2515.0	47
35	Very high	BRCA	c.4420C>T	Missense	193	predicted	TIER 1	32	chr12:g.124829437G>A	chr12:g.124829437G>A	NCOR2	Act	p.R1474C	R/C	1474	-	ENST00000405201	2515.0	47
35	Very high	BRCA	c.5360G>A	Missense	4985	predicted	TIER 1	30	chr1:g.120462971C>T	chr1:g.120462971C>T	NOTCH2	ambiguous	p.R1787Q	R/Q	1787	-	ENST00000256646	2472.0	34
35	Very high	BRCA	c.5470C>T	Missense	4956	predicted	TIER 1	30	chr1:g.120462861G>A	chr1:g.120462861G>A	NOTCH2	ambiguous	p.R1824C	R/C	1824	-	ENST00000256646	2472.0	34
35	Very high	BRCA	c.5471G>A	Missense	4955	predicted	TIER 1	30	chr1:g.120462860C>T	chr1:g.120462860C>T	NOTCH2	ambiguous	p.R1824H	R/H	1824	-	ENST00000256646	2472.0	34
35	Very high	BRCA	c.5656C>T	Missense	4887	predicted	TIER 1	31	chr1:g.120462060G>A	chr1:g.120462060G>A	NOTCH2	ambiguous	p.R1886C	R/C	1886	-	ENST00000256646	2472.0	34
35	Very high	BRCA	c.5732G>A	Missense	4873	predicted	TIER 1	31	chr1:g.120461984C>T	chr1:g.120461984C>T	NOTCH2	ambiguous	p.R1911H	R/H	1911	-	ENST00000256646	2472.0	34
35	Very high	BRCA	c.5792G>A	Missense	4840	predicted	TIER 1	32	chr1:g.120461166C>T	chr1:g.120461166C>T	NOTCH2	ambiguous	p.R1931H	R/H	1931	-	ENST00000256646	2472.0	34
35	Very high	BRCA	c.6008G>A	Missense	4771	predicted	TIER 1	33	chr1:g.120460307C>T	chr1:g.120460307C>T	NOTCH2	ambiguous	p.R2003Q	R/Q	2003	-	ENST00000256646	2472.0	34
35	Very high	BRCA	c.8150C>T	Missense	1032	predicted	TIER 1	56	chr17:g.29686023C>T	chr17:g.29686023C>T	NF1	LoF	p.P2717L	P/L	2717	+	ENST00000358273	2840.0	58
35	Very high	BRCA	c.7780C>T	Missense	881	predicted	TIER 1	53	chr17:g.29684019C>T	chr17:g.29684019C>T	NF1	LoF	p.R2594C	R/C	2594	+	ENST00000358273	2840.0	58
35	Very high	BRCA	c.7349G>A	Missense	703	predicted	TIER 1	50	chr17:g.29677228G>A	chr17:g.29677228G>A	NF1	LoF	p.R2450Q	R/Q	2450	+	ENST00000358273	2840.0	58
35	Very high	BRCA	c.5536C>T	Missense	42	predicted	TIER 1	38	chr17:g.29654784C>T	chr17:g.29654784C>T	NF1	LoF	p.R1846W	R/W	1846	+	ENST00000358273	2840.0	58
35	Very high	BRCA	c.2311C>T	Missense	3630	predicted	TIER 1	17	chr1:g.156851354C>T	chr1:g.156851354C>T	NTRK1	Act	p.R771C	R/C	771	+	ENST00000524377	797.0	17
35	Very high	BRCA	c.2297G>A	Missense	3625	predicted	TIER 1	17	chr1:g.156851340G>A	chr1:g.156851340G>A	NTRK1	Act	p.R766Q	R/Q	766	+	ENST00000524377	797.0	17
35	Very high	BRCA	c.2248C>T	Missense	3612	predicted	TIER 1	17	chr1:g.156851291C>T	chr1:g.156851291C>T	NTRK1	Act	p.R750C	R/C	750	+	ENST00000524377	797.0	17
35	Very high	BRCA	c.2074C>T	Missense	3536	predicted	TIER 1	16	chr1:g.156849818C>T	chr1:g.156849818C>T	NTRK1	Act	p.R692C	R/C	692	+	ENST00000524377	797.0	17
35	Very high	BRCA	c.2056C>T	Missense	3531	predicted	TIER 1	16	chr1:g.156849800C>T	chr1:g.156849800C>T	NTRK1	Act	p.R686C	R/C	686	+	ENST00000524377	797.0	17
35	Very high	BRCA	c.1777C>T	Missense	3372	predicted	TIER 1	14	chr1:g.156846336C>T	chr1:g.156846336C>T	NTRK1	Act	p.R593W	R/W	593	+	ENST00000524377	797.0	17
35	Very high	BRCA	c.1747C>T	Missense	3365	predicted	TIER 1	14	chr1:g.156846306C>T	chr1:g.156846306C>T	NTRK1	Act	p.R583C	R/C	583	+	ENST00000524377	797.0	17
35	Very high	BRCA	c.1741G>A	Missense	3361	predicted	TIER 1	14	chr1:g.156846300G>A	chr1:g.156846300G>A	NTRK1	Act	p.E581K	E/K	581	+	ENST00000524377	797.0	17
35	Very high	BRCA	c.1720C>T	Missense	3349	predicted	TIER 1	14	chr1:g.156846279C>T	chr1:g.156846279C>T	NTRK1	Act	p.R574C	R/C	574	+	ENST00000524377	797.0	17
35	Very high	BRCA	c.1675C>T	Missense	3336	predicted	TIER 1	14	chr1:g.156846234C>T	chr1:g.156846234C>T	NTRK1	Act	p.R559C	R/C	559	+	ENST00000524377	797.0	17
35	Very high	BRCA	c.1520G>A	Missense	3231	predicted	TIER 1	13	chr1:g.156845890G>A	chr1:g.156845890G>A	NTRK1	Act	p.R507H	R/H	507	+	ENST00000524377	797.0	17
35	Very high	BRCA	c.1519C>T	Missense	3229	predicted	TIER 1	13	chr1:g.156845889C>T	chr1:g.156845889C>T	NTRK1	Act	p.R507C	R/C	507	+	ENST00000524377	797.0	17
35	Very high	BRCA	c.1519C>A	Missense	3230	predicted	TIER 1	13	chr1:g.156845889C>A	chr1:g.156845889C>A	NTRK1	Act	p.R507S	R/S	507	+	ENST00000524377	797.0	17
35	Very high	BRCA	c.217delT	Frameshift	2005	predicted	TIER 2	3	chr1:g.120548150delA	chr1:g.120548149CA>C	NOTCH2	ambiguous	p.C73Afs*44	C/.	73	-	ENST00000256646	2472.0	34
35	Very high	BRCA	c.760G>T	Missense	1745	predicted	TIER 1	5	chr1:g.120529697C>A	chr1:g.120529697C>A	NOTCH2	ambiguous	p.G254W	G/W	254	-	ENST00000256646	2472.0	34
35	Very high	BRCA	c.1067G>A	Missense	1657	predicted	TIER 1	6	chr1:g.120512175C>T	chr1:g.120512175C>T	NOTCH2	ambiguous	p.R356H	R/H	356	-	ENST00000256646	2472.0	34
35	Very high	BRCA	c.1355G>T	Missense	1541	predicted	TIER 1	8	chr1:g.120510154C>A	chr1:g.120510154C>A	NOTCH2	ambiguous	p.R452L	R/L	452	-	ENST00000256646	2472.0	34
35	Very high	BRCA	c.3895C>T	Missense	534	predicted	TIER 1	24	chr1:g.120469232G>A	chr1:g.120469232G>A	NOTCH2	ambiguous	p.R1299W	R/W	1299	-	ENST00000256646	2472.0	34
35	Very high	BRCA	c.4889G>A	Missense	195	predicted	TIER 1	27	chr1:g.120465372C>T	chr1:g.120465372C>T	NOTCH2	ambiguous	p.R1630H	R/H	1630	-	ENST00000256646	2472.0	34
35	Very high	BRCA	c.5105G>A	Missense	100	predicted	TIER 1	28	chr1:g.120464967C>T	chr1:g.120464967C>T	NOTCH2	ambiguous	p.R1702Q	R/Q	1702	-	ENST00000256646	2472.0	34
35	Very high	BRCA	c.5179C>T	Missense	83	predicted	TIER 1	28	chr1:g.120464893G>A	chr1:g.120464893G>A	NOTCH2	ambiguous	p.R1727C	R/C	1727	-	ENST00000256646	2472.0	34
35	Very high	BRCA	c.5180G>A	Missense	82	predicted	TIER 1	28	chr1:g.120464892C>T	chr1:g.120464892C>T	NOTCH2	ambiguous	p.R1727H	R/H	1727	-	ENST00000256646	2472.0	34
35	Very high	BRCA	c.562C>T	Missense	4425	predicted	TIER 1	5	chr5:g.67575489C>T	chr5:g.67575489C>T	PIK3R1	LoF	p.R188C	R/C	188	+	ENST00000521381	725.0	16
35	Very high	BRCA	c.277C>T	Missense	4210	predicted	TIER 1	2	chr5:g.67522780C>T	chr5:g.67522780C>T	PIK3R1	LoF	p.R93W	R/W	93	+	ENST00000521381	725.0	16
35	Very high	BRCA	c.2695C>T	Missense	4033	predicted	TIER 1	19	chr3:g.178947820C>T	chr3:g.178947820C>T	PIK3CA	Act	p.R899C	R/C	899	+	ENST00000263967	1069.0	21
35	Very high	BRCA	c.2495G>A	Missense	3952	predicted	TIER 1	17	chr3:g.178943828G>A	chr3:g.178943828G>A	PIK3CA	Act	p.R832Q	R/Q	832	+	ENST00000263967	1069.0	21
35	Very high	BRCA	c.2423G>A	Missense	3945	predicted	TIER 1	17	chr3:g.178943756G>A	chr3:g.178943756G>A	PIK3CA	Act	p.R808Q	R/Q	808	+	ENST00000263967	1069.0	21
35	Very high	BRCA	c.2422C>T	Missense	3944	predicted	TIER 1	17	chr3:g.178943755C>T	chr3:g.178943755C>T	PIK3CA	Act	p.R808W	R/W	808	+	ENST00000263967	1069.0	21
35	Very high	BRCA	c.4171G>A	Missense	4698	predicted	TIER 1	35	chr9:g.8404576C>T	chr9:g.8404576C>T	PTPRD	LoF	p.A1391T	A/T	1391	-	ENST00000381196	1913.0	43
35	Very high	BRCA	c.4187G>A	Missense	4690	predicted	TIER 1	35	chr9:g.8404560C>T	chr9:g.8404560C>T	PTPRD	LoF	p.R1396Q	R/Q	1396	-	ENST00000381196	1913.0	43
35	Very high	BRCA	c.4187G>T	Missense	4689	predicted	TIER 1	35	chr9:g.8404560C>A	chr9:g.8404560C>A	PTPRD	LoF	p.R1396L	R/L	1396	-	ENST00000381196	1913.0	43
35	Very high	BRCA	c.4487G>A	Missense	4509	predicted	TIER 1	37	chr9:g.8376626C>T	chr9:g.8376626C>T	PTPRD	LoF	p.R1496Q	R/Q	1496	-	ENST00000381196	1913.0	43
35	Very high	BRCA	c.4607G>A	Missense	4437	predicted	TIER 1	38	chr9:g.8375990C>T	chr9:g.8375990C>T	PTPRD	LoF	p.R1536H	R/H	1536	-	ENST00000381196	1913.0	43
35	Very high	BRCA	c.5240G>A	Missense	4122	predicted	TIER 1	41	chr9:g.8340356C>T	chr9:g.8340356C>T	PTPRD	LoF	p.R1747H	R/H	1747	-	ENST00000381196	1913.0	43
35	Very high	BRCA	c.5240G>T	Missense	4123	predicted	TIER 1	41	chr9:g.8340356C>A	chr9:g.8340356C>A	PTPRD	LoF	p.R1747L	R/L	1747	-	ENST00000381196	1913.0	43
35	Very high	BRCA	c.5285G>T	Missense	4046	predicted	TIER 1	42	chr9:g.8339016C>A	chr9:g.8339016C>A	PTPRD	LoF	p.R1762L	R/L	1762	-	ENST00000381196	1913.0	43
35	Very high	BRCA	c.5393G>A	Missense	3964	predicted	TIER 1	43	chr9:g.8331723C>T	chr9:g.8331723C>T	PTPRD	LoF	p.R1798Q	R/Q	1798	-	ENST00000381196	1913.0	43
35	Very high	BRCA	c.5393G>T	Missense	3963	predicted	TIER 1	43	chr9:g.8331723C>A	chr9:g.8331723C>A	PTPRD	LoF	p.R1798L	R/L	1798	-	ENST00000381196	1913.0	43
35	Very high	BRCA	c.5424G>T	Missense	3958	predicted	TIER 1	43	chr9:g.8331692C>A	chr9:g.8331692C>A	PTPRD	LoF	p.W1808C	W/C	1808	-	ENST00000381196	1913.0	43
35	Very high	BRCA	c.5449G>A	Missense	3946	predicted	TIER 1	43	chr9:g.8331667C>T	chr9:g.8331667C>T	PTPRD	LoF	p.G1817R	G/R	1817	-	ENST00000381196	1913.0	43
35	Very high	BRCA	c.5473G>A	Missense	3938	predicted	TIER 1	43	chr9:g.8331643C>T	chr9:g.8331643C>T	PTPRD	LoF	p.G1825S	G/S	1825	-	ENST00000381196	1913.0	43
35	Very high	BRCA	c.5536G>A	Missense	3861	predicted	TIER 1	44	chr9:g.8319965C>T	chr9:g.8319965C>T	PTPRD	LoF	p.A1846T	A/T	1846	-	ENST00000381196	1913.0	43
35	Very high	BRCA	c.5549_5551delGAA	InFrameDeletion	3854	predicted	TIER 2	44	chr9:g.8319953_8319955delTTC	chr9:g.8319949GTTC>G	PTPRD	LoF	p.R1850delR	R/-	1850	-	ENST00000381196	1913.0	43
35	Very high	BRCA	c.5648G>T	Missense	3828	predicted	TIER 1	44	chr9:g.8319853C>A	chr9:g.8319853C>A	PTPRD	LoF	p.R1883L	R/L	1883	-	ENST00000381196	1913.0	43
35	Very high	BRCA	c.5668G>A	Missense	3821	predicted	TIER 1	44	chr9:g.8319833C>T	chr9:g.8319833C>T	PTPRD	LoF	p.E1890K	E/K	1890	-	ENST00000381196	1913.0	43
35	Very high	BRCA	c.4753C>T	Missense	57	predicted	TIER 1	39	chr8:g.69136839C>T	chr8:g.69136839C>T	PREX2	ambiguous	p.R1585W	R/W	1585	+	ENST00000288368	1607.0	40
35	Very high	BRCA	c.4730C>A	Missense	49	predicted	TIER 1	39	chr8:g.69136816C>A	chr8:g.69136816C>A	PREX2	ambiguous	p.A1577E	A/E	1577	+	ENST00000288368	1607.0	40
35	Very high	BRCA	c.4700G>A	Missense	16	predicted	TIER 1	38	chr8:g.69129946G>A	chr8:g.69129946G>A	PREX2	ambiguous	p.R1567Q	R/Q	1567	+	ENST00000288368	1607.0	40
35	Very high	BRCA	c.4699C>T	Missense	14	predicted	TIER 1	38	chr8:g.69129945C>T	chr8:g.69129945C>T	PREX2	ambiguous	p.R1567W	R/W	1567	+	ENST00000288368	1607.0	40
35	Very high	BRCA	c.4670G>T	Missense	9	predicted	TIER 1	38	chr8:g.69129916G>T	chr8:g.69129916G>T	PREX2	ambiguous	p.R1557L	R/L	1557	+	ENST00000288368	1607.0	40
35	Very high	BRCA	c.4670G>A	Missense	8	predicted	TIER 1	38	chr8:g.69129916G>A	chr8:g.69129916G>A	PREX2	ambiguous	p.R1557H	R/H	1557	+	ENST00000288368	1607.0	40
35	Very high	BRCA	c.4669C>T	Missense	7	predicted	TIER 1	38	chr8:g.69129915C>T	chr8:g.69129915C>T	PREX2	ambiguous	p.R1557C	R/C	1557	+	ENST00000288368	1607.0	40
35	Very high	BRCA	c.4657G>A	Missense	4	predicted	TIER 1	38	chr8:g.69129903G>A	chr8:g.69129903G>A	PREX2	ambiguous	p.G1553R	G/R	1553	+	ENST00000288368	1607.0	40
35	Very high	BRCA	c.7360G>A	Missense	3643	predicted	TIER 1	47	chr4:g.87732244G>A	chr4:g.87732244G>A	PTPN13	ambiguous	p.G2454R	G/R	2454	+	ENST00000436978	2491.0	48
35	Very high	BRCA	c.7336C>T	Missense	3633	predicted	TIER 1	47	chr4:g.87732220C>T	chr4:g.87732220C>T	PTPN13	ambiguous	p.R2446C	R/C	2446	+	ENST00000436978	2491.0	48
35	Very high	BRCA	c.7336C>A	Missense	3632	predicted	TIER 1	47	chr4:g.87732220C>A	chr4:g.87732220C>A	PTPN13	ambiguous	p.R2446S	R/S	2446	+	ENST00000436978	2491.0	48
35	Very high	BRCA	c.7256G>A	Missense	3597	predicted	TIER 1	46	chr4:g.87731079G>A	chr4:g.87731079G>A	PTPN13	ambiguous	p.R2419H	R/H	2419	+	ENST00000436978	2491.0	48
35	Very high	BRCA	c.7255C>T	Missense	3596	predicted	TIER 1	46	chr4:g.87731078C>T	chr4:g.87731078C>T	PTPN13	ambiguous	p.R2419C	R/C	2419	+	ENST00000436978	2491.0	48
35	Very high	BRCA	c.7111C>T	Missense	3542	predicted	TIER 1	46	chr4:g.87730934C>T	chr4:g.87730934C>T	PTPN13	ambiguous	p.R2371C	R/C	2371	+	ENST00000436978	2491.0	48
35	Very high	BRCA	c.6976C>A	Missense	3474	predicted	TIER 1	45	chr4:g.87728928C>A	chr4:g.87728928C>A	PTPN13	ambiguous	p.R2326S	R/S	2326	+	ENST00000436978	2491.0	48
35	Very high	BRCA	c.5513G>A	Missense	2834	predicted	TIER 1	33	chr4:g.87695674G>A	chr4:g.87695674G>A	PTPN13	ambiguous	p.R1838Q	R/Q	1838	+	ENST00000436978	2491.0	48
35	Very high	BRCA	c.5512C>T	Missense	2833	predicted	TIER 1	33	chr4:g.87695673C>T	chr4:g.87695673C>T	PTPN13	ambiguous	p.R1838W	R/W	1838	+	ENST00000436978	2491.0	48
35	Very high	BRCA	c.4265G>A	Missense	2409	predicted	TIER 1	27	chr4:g.87687591G>A	chr4:g.87687591G>A	PTPN13	ambiguous	p.R1422H	R/H	1422	+	ENST00000436978	2491.0	48
35	Very high	BRCA	c.4264C>T	Missense	2408	predicted	TIER 1	27	chr4:g.87687590C>T	chr4:g.87687590C>T	PTPN13	ambiguous	p.R1422C	R/C	1422	+	ENST00000436978	2491.0	48
35	Very high	BRCA	c.3427C>T	Missense	2109	predicted	TIER 1	23	chr4:g.87680100C>T	chr4:g.87680100C>T	PTPN13	ambiguous	p.R1143C	R/C	1143	+	ENST00000436978	2491.0	48
35	Very high	BRCA	c.2449C>T	Missense	1652	predicted	TIER 1	16	chr4:g.87662931C>T	chr4:g.87662931C>T	PTPN13	ambiguous	p.R817C	R/C	817	+	ENST00000436978	2491.0	48
35	Very high	BRCA	c.1221T>A	Nonsense	1124	predicted	TIER 2	8	chr4:g.87637708T>A	chr4:g.87637708T>A	PTPN13	ambiguous	p.Y407*	Y/*	407	+	ENST00000436978	2491.0	48
35	Very high	BRCA	c.439C>T	Missense	739	predicted	TIER 1	5	chr4:g.87610236C>T	chr4:g.87610236C>T	PTPN13	ambiguous	p.R147W	R/W	147	+	ENST00000436978	2491.0	48
35	Very high	BRCA	c.34C>T	Missense	594	predicted	TIER 1	2	chr4:g.87556443C>T	chr4:g.87556443C>T	PTPN13	ambiguous	p.R12W	R/W	12	+	ENST00000436978	2491.0	48
35	Very high	BRCA	c.1981C>T	Missense	3169	known	TIER 1	20	chr13:g.49033844C>T	chr13:g.49033844C>T	RB1	LoF	p.R661W	R/W	661	+	ENST00000267163	929.0	27
35	Very high	BRCA	c.350G>T	Missense	2047	predicted	TIER 1	13	chr9:g.8633319C>A	chr9:g.8633319C>A	PTPRD	LoF	p.R117L	R/L	117	-	ENST00000381196	1913.0	43
35	Very high	BRCA	c.1618C>T	Missense	1290	predicted	TIER 1	21	chr9:g.8507360G>A	chr9:g.8507360G>A	PTPRD	LoF	p.R540C	R/C	540	-	ENST00000381196	1913.0	43
35	Very high	BRCA	c.2431C>T	Missense	776	predicted	TIER 1	26	chr9:g.8492898G>A	chr9:g.8492898G>A	PTPRD	LoF	p.R811C	R/C	811	-	ENST00000381196	1913.0	43
35	Very high	BRCA	c.97C>T	Missense	4352	predicted	TIER 1	3	chr1:g.241262044G>A	chr1:g.241262044G>A	RGS7	ambiguous	p.R33W	R/W	33	-	ENST00000366565	488.0	18
35	Very high	BRCA	c.130C>T	Missense	4345	predicted	TIER 1	3	chr1:g.241262011G>A	chr1:g.241262011G>A	RGS7	ambiguous	p.R44C	R/C	44	-	ENST00000366565	488.0	18
35	Very high	BRCA	c.325C>T	Missense	4254	predicted	TIER 1	5	chr1:g.241099908G>A	chr1:g.241099908G>A	RGS7	ambiguous	p.R109W	R/W	109	-	ENST00000366565	488.0	18
35	Very high	BRCA	c.425G>A	Missense	4172	predicted	TIER 1	7	chr1:g.241033380C>T	chr1:g.241033380C>T	RGS7	ambiguous	p.R142Q	R/Q	142	-	ENST00000366565	488.0	18
35	Very high	BRCA	c.780_782delACA	SpliceDonorDeletion	3974	predicted	TIER 2	11	chr1:g.240979624_240979626delTGT	chr1:g.240979617CTGT>C	RGS7	ambiguous	.	./.	.	-	ENST00000366565	488.0	18
35	Very high	BRCA	c.817C>T	Missense	3933	predicted	TIER 1	12	chr1:g.240978044G>A	chr1:g.240978044G>A	RGS7	ambiguous	p.R273W	R/W	273	-	ENST00000366565	488.0	18
35	Very high	BRCA	c.1089G>T	Missense	3773	predicted	TIER 1	15	chr1:g.240969620C>A	chr1:g.240969620C>A	RGS7	ambiguous	p.W363C	W/C	363	-	ENST00000366565	488.0	18
35	Very high	BRCA	c.1247G>A	Missense	3745	predicted	TIER 1	15	chr1:g.240969462C>T	chr1:g.240969462C>T	RGS7	ambiguous	p.R416Q	R/Q	416	-	ENST00000366565	488.0	18
35	Very high	BRCA	c.2626C>T	Missense	3459	predicted	TIER 1	25	chr13:g.49050942C>T	chr13:g.49050942C>T	RB1	LoF	p.R876C	R/C	876	+	ENST00000267163	929.0	27
35	Very high	BRCA	c.1463C>T	Missense	2975	predicted	TIER 1	16	chr13:g.48954342C>T	chr13:g.48954342C>T	RB1	LoF	p.A488V	A/V	488	+	ENST00000267163	929.0	27
35	Very high	BRCA	c.1351C>T	Missense	2908	predicted	TIER 1	14	chr13:g.48953748C>T	chr13:g.48953748C>T	RB1	LoF	p.R451C	R/C	451	+	ENST00000267163	929.0	27
35	Very high	BRCA	c.1334G>A	Missense	2906	predicted	TIER 1	14	chr13:g.48953731G>A	chr13:g.48953731G>A	RB1	LoF	p.R445Q	R/Q	445	+	ENST00000267163	929.0	27
35	Very high	BRCA	c.784C>T	Missense	2653	predicted	TIER 1	8	chr13:g.48937016C>T	chr13:g.48937016C>T	RB1	LoF	p.R262W	R/W	262	+	ENST00000267163	929.0	27
35	Very high	BRCA	c.866G>A	Missense	3365	predicted	TIER 1	7	chr2:g.198274532C>T	chr2:g.198274532C>T	SF3B1	Act	p.R289H	R/H	289	-	ENST00000335508	1305.0	25
35	Very high	BRCA	c.2771G>A	Missense	2831	predicted	TIER 1	19	chr2:g.198265106C>T	chr2:g.198265106C>T	SF3B1	Act	p.R924Q	R/Q	924	-	ENST00000335508	1305.0	25
35	Very high	BRCA	c.493G>A	Missense	1048	predicted	TIER 1	5	chr21:g.36252869C>T	chr21:g.36252869C>T	RUNX1	ambiguous	p.G165S	G/S	165	-	ENST00000437180	481.0	9
35	Very high	BRCA	c.70_78delCAGCAGCAG	InFrameDeletion	2416	predicted	TIER 2	1	chr20:g.50418871_50418879delTGCTGCTGC	chr20:g.50418869TCTGCTGCTG>T	SALL4	ambiguous	p.Q24_Q26delQQQ	QQQ/-	24	-	ENST00000217086	1054.0	4
35	Very high	BRCA	c.2806G>A	Missense	1496	predicted	TIER 1	4	chr20:g.50401160C>T	chr20:g.50401160C>T	SALL4	ambiguous	p.E936K	E/K	936	-	ENST00000217086	1054.0	4
35	Very high	BRCA	c.10921C>T	Missense	3921	predicted	TIER 1	15	chr1:g.16265848C>T	chr1:g.16265848C>T	SPEN	ambiguous	p.R3641C	R/C	3641	+	ENST00000375759	3665.0	15
35	Very high	BRCA	c.10694G>A	Missense	3823	predicted	TIER 1	13	chr1:g.16264491G>A	chr1:g.16264491G>A	SPEN	ambiguous	p.R3565Q	R/Q	3565	+	ENST00000375759	3665.0	15
35	Very high	BRCA	c.10661G>A	Missense	3815	predicted	TIER 1	13	chr1:g.16264458G>A	chr1:g.16264458G>A	SPEN	ambiguous	p.R3554Q	R/Q	3554	+	ENST00000375759	3665.0	15
35	Very high	BRCA	c.10606C>T	Missense	3805	predicted	TIER 1	13	chr1:g.16264403C>T	chr1:g.16264403C>T	SPEN	ambiguous	p.R3536W	R/W	3536	+	ENST00000375759	3665.0	15
35	Very high	BRCA	c.10207C>T	Missense	3667	predicted	TIER 1	12	chr1:g.16263838C>T	chr1:g.16263838C>T	SPEN	ambiguous	p.R3403C	R/C	3403	+	ENST00000375759	3665.0	15
35	Very high	BRCA	c.9934C>T	Missense	3533	predicted	TIER 1	11	chr1:g.16262669C>T	chr1:g.16262669C>T	SPEN	ambiguous	p.R3312C	R/C	3312	+	ENST00000375759	3665.0	15
35	Very high	BRCA	c.7184_7186delCTC	InFrameDeletion	2780	predicted	TIER 2	11	chr1:g.16259919_16259921delCTC	chr1:g.16259912ACTC>A	SPEN	ambiguous	p.P2395delP	P/-	2395	+	ENST00000375759	3665.0	15
35	Very high	BRCA	c.2419C>T	Missense	1562	predicted	TIER 1	11	chr1:g.16255154C>T	chr1:g.16255154C>T	SPEN	ambiguous	p.R807C	R/C	807	+	ENST00000375759	3665.0	15
35	Very high	BRCA	c.1648C>T	Missense	1305	predicted	TIER 1	9	chr1:g.16247377C>T	chr1:g.16247377C>T	SPEN	ambiguous	p.R550C	R/C	550	+	ENST00000375759	3665.0	15
35	Very high	BRCA	c.1363C>T	Missense	1186	predicted	TIER 1	6	chr1:g.16242742C>T	chr1:g.16242742C>T	SPEN	ambiguous	p.R455C	R/C	455	+	ENST00000375759	3665.0	15
35	Very high	BRCA	c.1052G>A	Missense	437	predicted	TIER 1	9	chr12:g.50484292G>A	chr12:g.50484292G>A	SMARCD1	ambiguous	p.R351H	R/H	351	+	ENST00000394963	516.0	13
35	Very high	BRCA	c.1051C>T	Missense	436	predicted	TIER 1	9	chr12:g.50484291C>T	chr12:g.50484291C>T	SMARCD1	ambiguous	p.R351C	R/C	351	+	ENST00000394963	516.0	13
35	Very high	BRCA	c.841C>T	Missense	346	predicted	TIER 1	7	chr12:g.50483736C>T	chr12:g.50483736C>T	SMARCD1	ambiguous	p.R281W	R/W	281	+	ENST00000394963	516.0	13
35	Very high	BRCA	c.485G>A	Missense	4673	predicted	TIER 1	2	chr12:g.115118856C>T	chr12:g.115118856C>T	TBX3	LoF	p.R162H	R/H	162	-	ENST00000257566	744.0	8
35	Very high	BRCA	c.506G>A	Missense	4672	predicted	TIER 1	2	chr12:g.115118835C>T	chr12:g.115118835C>T	TBX3	LoF	p.R169Q	R/Q	169	-	ENST00000257566	744.0	8
35	Very high	BRCA	c.2177G>T	Missense	3979	predicted	TIER 1	8	chr12:g.115109701C>A	chr12:g.115109701C>A	TBX3	LoF	p.R726L	R/L	726	-	ENST00000257566	744.0	8
35	Very high	BRCA	c.845G>A	Missense	162	known	TIER 1	8	chr17:g.7577093C>T	chr17:g.7577093C>T	TP53	LoF	p.R282Q	R/Q	282	-	ENST00000269305	394.0	11
35	Very high	BRCA	c.841G>A	Missense	164	predicted	TIER 1	8	chr17:g.7577097C>T	chr17:g.7577097C>T	TP53	LoF	p.D281N	D/N	281	-	ENST00000269305	394.0	11
35	Very high	BRCA	c.4913G>A	Missense	3677	predicted	TIER 1	19	chr6:g.157525018G>A	chr6:g.157525018G>A	ARID1B	LoF	p.R1638H	R/H	1638	+	ENST00000346085	2250.0	20
35	Very high	BRCA	c.4907C>T	Missense	3675	predicted	TIER 1	19	chr6:g.157525012C>T	chr6:g.157525012C>T	ARID1B	LoF	p.A1636V	A/V	1636	+	ENST00000346085	2250.0	20
35	Very high	BRCA	c.4555C>T	Missense	3564	predicted	TIER 1	18	chr6:g.157522283C>T	chr6:g.157522283C>T	ARID1B	LoF	p.R1519C	R/C	1519	+	ENST00000346085	2250.0	20
35	Very high	BRCA	c.3976C>T	Missense	3351	predicted	TIER 1	16	chr6:g.157517412C>T	chr6:g.157517412C>T	ARID1B	LoF	p.R1326C	R/C	1326	+	ENST00000346085	2250.0	20
35	Very high	BRCA	c.3752G>A	Missense	3245	predicted	TIER 1	15	chr6:g.157511234G>A	chr6:g.157511234G>A	ARID1B	LoF	p.R1251Q	R/Q	1251	+	ENST00000346085	2250.0	20
35	Very high	BRCA	c.2444C>T	Missense	2525	predicted	TIER 1	8	chr6:g.157454234C>T	chr6:g.157454234C>T	ARID1B	LoF	p.S815L	S/L	815	+	ENST00000346085	2250.0	20
35	Very high	BRCA	c.1762G>T	Nonsense	2168	predicted	TIER 1	3	chr6:g.157192772G>T	chr6:g.157192772G>T	ARID1B	LoF	p.E588*	E/*	588	+	ENST00000346085	2250.0	20
35	Very high	BRCA	c.1669C>T	Missense	2113	predicted	TIER 1	2	chr6:g.157150487C>T	chr6:g.157150487C>T	ARID1B	LoF	p.R557W	R/W	557	+	ENST00000346085	2250.0	20
35	Very high	BRCA	c.1423_1428delTTGGGC	InFrameDeletion	2032	predicted	TIER 2	1	chr6:g.157100486_157100491delTTGGGC	chr6:g.157100480ATGGGCT>A	ARID1B	LoF	p.L475_G476delLG	LG/-	475	+	ENST00000346085	2250.0	20
35	Very high	BRCA	c.1349_1354dupCGTCGC	InFrameInsertion	2023	predicted	TIER 2	1	chr6:g.157100412_157100417dupCGTCGC	chr6:g.157100408C>CCGCCGT	ARID1B	LoF	p.P450_S451dupPS	-/PS	450	+	ENST00000346085	2250.0	20
35	Very high	BRCA	c.1345_1350dupCCGCCG	InFrameInsertion	2018	predicted	TIER 2	1	chr6:g.157100408_157100413dupCCGCCG	chr6:g.157100396G>GCGCCGC	ARID1B	LoF	p.P449_P450dupPP	-/PP	449	+	ENST00000346085	2250.0	20
35	Very high	BRCA	c.998_1006delGAGCAGGAG	InFrameDeletion	1947	predicted	TIER 2	1	chr6:g.157100061_157100069delGAGCAGGAG	chr6:g.157100049CAGGAGCAGG>C	ARID1B	LoF	p.G333_G335delGAG	GAG/-	333	+	ENST00000346085	2250.0	20
35	Very high	BRCA	c.992_997delCAGGAG	InFrameDeletion	1944	predicted	TIER 2	1	chr6:g.157100055_157100060delCAGGAG	chr6:g.157100043GAGGAGC>G	ARID1B	LoF	p.A331_G332delAG	AG/-	331	+	ENST00000346085	2250.0	20
35	Very high	BRCA	c.992_997dupCAGGAG	InFrameInsertion	1943	predicted	TIER 2	1	chr6:g.157100055_157100060dupCAGGAG	chr6:g.157100043G>GAGGAGC	ARID1B	LoF	p.A331_G332dupAG	-/AG	331	+	ENST00000346085	2250.0	20
35	Very high	BRCA	c.993_1007delAGGAGGAGCAGGAGC	InFrameDeletion	1941	predicted	TIER 2	1	chr6:g.157100056_157100070delAGGAGGAGCAGGAGC	chr6:g.157100040GAGGAGGAGCAGGAGC>G	ARID1B	LoF	p.G333_G337delGAGAG	GAGAG/-	333	+	ENST00000346085	2250.0	20
35	Very high	BRCA	c.983_991dupGAGCAGGAG	InFrameInsertion	1939	predicted	TIER 2	1	chr6:g.157100046_157100054dupGAGCAGGAG	chr6:g.157100040G>GAGGAGGAGC	ARID1B	LoF	p.G328_G330dupGAG	-/GAG	328	+	ENST00000346085	2250.0	20
35	Very high	BRCA	c.980_1006delGAGGAGCAGGAGCAGGAGGAGCAGGAG	InFrameDeletion	1936	predicted	TIER 2	1	chr6:g.157100043_157100069delGAGGAGCAGGAGCAGGAGGAGCAGGAG	chr6:g.157100037GAGGAGGAGGAGCAGGAGCAGGAGGAGC>G	ARID1B	LoF	p.G327_G335delGGAGAGGAG	GGAGAGGAG/-	327	+	ENST00000346085	2250.0	20
35	Very high	BRCA	c.974_985delGAGGAGGAGGAG	InFrameDeletion	1930	predicted	TIER 2	1	chr6:g.157100037_157100048delGAGGAGGAGGAG	chr6:g.157100023CGGAGGAGGAGGA>C	ARID1B	LoF	p.G325_G328delGGGG	GGGG/-	325	+	ENST00000346085	2250.0	20
35	Very high	BRCA	c.977_985delGAGGAGGAG	InFrameDeletion	1929	predicted	TIER 2	1	chr6:g.157100040_157100048delGAGGAGGAG	chr6:g.157100023CGGAGGAGGA>C	ARID1B	LoF	p.G326_G328delGGG	GGG/-	326	+	ENST00000346085	2250.0	20
35	Very high	BRCA	c.980_985delGAGGAG	InFrameDeletion	1928	predicted	TIER 2	1	chr6:g.157100043_157100048delGAGGAG	chr6:g.157100023CGGAGGA>C	ARID1B	LoF	p.G327_G328delGG	GG/-	327	+	ENST00000346085	2250.0	20
35	Very high	BRCA	c.983_985delGAG	InFrameDeletion	1927	predicted	TIER 2	1	chr6:g.157100046_157100048delGAG	chr6:g.157100023CGGA>C	ARID1B	LoF	p.G328delG	G/-	328	+	ENST00000346085	2250.0	20
35	Very high	BRCA	c.960_968delCGGAGGAGG	MultiAAMissense	1921	predicted	TIER 1	1	chr6:g.157100023_157100031delCGGAGGAGG	chr6:g.157100021AGCGGAGGAG>A	ARID1B	LoF	p.S320_G323delinsR	insR/-	320	+	ENST00000346085	2250.0	20
35	Very high	BRCA	c.960_962delCGG	MultiAAMissense	1923	predicted	TIER 1	1	chr6:g.157100023_157100025delCGG	chr6:g.157100021AGCG>A	ARID1B	LoF	p.S320_G321delinsR	insR/-	320	+	ENST00000346085	2250.0	20
35	Very high	BRCA	c.957_968delCAGCGGAGGAGG	InFrameDeletion	1918	predicted	TIER 2	1	chr6:g.157100020_157100031delCAGCGGAGGAGG	chr6:g.157100011AGGAGGAGGCAGC>A	ARID1B	LoF	p.S320_G323delSGGG	SGGG/-	320	+	ENST00000346085	2250.0	20
35	Very high	BRCA	c.957_983delCAGCGGAGGAGGAGGAGGAGGAGGAGG	InFrameDeletion	1916	predicted	TIER 2	1	chr6:g.157100020_157100046delCAGCGGAGGAGGAGGAGGAGGAGGAGG	chr6:g.157100005CGGAGGAGGAGGAGGCAGCGGAGGAGGA>C	ARID1B	LoF	p.S320_G328delSGGGGGGGG	SGGGGGGGG/-	320	+	ENST00000346085	2250.0	20
35	Very high	BRCA	c.957_980delCAGCGGAGGAGGAGGAGGAGGAGG	InFrameDeletion	1915	predicted	TIER 2	1	chr6:g.157100020_157100043delCAGCGGAGGAGGAGGAGGAGGAGG	chr6:g.157100005CGGAGGAGGAGGAGGCAGCGGAGGA>C	ARID1B	LoF	p.S320_G327delSGGGGGGG	SGGGGGGG/-	320	+	ENST00000346085	2250.0	20
35	Very high	BRCA	c.944_945insCGGAGGAGGAGGAGGCAGCGG	InFrameInsertion	1910	predicted	TIER 2	1	chr6:g.157100007_157100008insCGGAGGAGGAGGAGGCAGCGG	chr6:g.157100003G>GGCGGCGGAGGAGGAGGAGGCA	ARID1B	LoF	p.G319_S320insGSGGGGG	-/GSGGGGG	319	+	ENST00000346085	2250.0	20
35	Very high	BRCA	c.940_957dupGGCGGAGGAGGAGGAGGC	InFrameInsertion	1907	predicted	TIER 2	1	chr6:g.157100003_157100020dupGGCGGAGGAGGAGGAGGC	chr6:g.157099999C>CGGCGGCGGAGGAGGAGGA	ARID1B	LoF	p.G314_G319dupGGGGGG	-/GGGGGG	314	+	ENST00000346085	2250.0	20
35	Very high	BRCA	c.936_947dupCGGCGGCGGAGG	InFrameInsertion	1906	predicted	TIER 2	1	chr6:g.157099999_157100010dupCGGCGGCGGAGG	chr6:g.157099996C>CGGCGGCGGCGGA	ARID1B	LoF	p.G316_G319dupGGGG	-/GGGG	316	+	ENST00000346085	2250.0	20
35	Very high	BRCA	c.933_944delCGGCGGCGGCGG	InFrameDeletion	1903	predicted	TIER 2	1	chr6:g.157099996_157100007delCGGCGGCGGCGG	chr6:g.157099981GGGCGGCGGCGGC>G	ARID1B	LoF	p.G316_G319delGGGG	GGGG/-	316	+	ENST00000346085	2250.0	20
35	Very high	BRCA	c.936_944delCGGCGGCGG	InFrameDeletion	1902	predicted	TIER 2	1	chr6:g.157099999_157100007delCGGCGGCGG	chr6:g.157099981GGGCGGCGGC>G	ARID1B	LoF	p.G317_G319delGGG	GGG/-	317	+	ENST00000346085	2250.0	20
35	Very high	BRCA	c.939_944delCGGCGG	InFrameDeletion	1901	predicted	TIER 2	1	chr6:g.157100002_157100007delCGGCGG	chr6:g.157099981GGGCGGC>G	ARID1B	LoF	p.G318_G319delGG	GG/-	318	+	ENST00000346085	2250.0	20
35	Very high	BRCA	c.942_944delCGG	InFrameDeletion	1900	predicted	TIER 2	1	chr6:g.157100005_157100007delCGG	chr6:g.157099981GGGC>G	ARID1B	LoF	p.G319delG	G/-	319	+	ENST00000346085	2250.0	20
35	Very high	BRCA	c.939_944dupCGGCGG	InFrameInsertion	1899	predicted	TIER 2	1	chr6:g.157100002_157100007dupCGGCGG	chr6:g.157099981G>GGGCGGC	ARID1B	LoF	p.G318_G319dupGG	-/GG	318	+	ENST00000346085	2250.0	20
35	Very high	BRCA	c.942_944dupCGG	InFrameInsertion	1898	predicted	TIER 2	1	chr6:g.157100005_157100007dupCGG	chr6:g.157099981G>GGGC	ARID1B	LoF	p.G319dupG	-/G	319	+	ENST00000346085	2250.0	20
35	Very high	BRCA	c.428_436dupCGGGCGGCG	InFrameInsertion	1779	predicted	TIER 2	1	chr6:g.157099491_157099499dupCGGGCGGCG	chr6:g.157099482T>TGGGCGGCGC	ARID1B	LoF	p.A143_G145dupAGG	-/AGG	143	+	ENST00000346085	2250.0	20
35	Very high	BRCA	c.383_384insACAGCAGCAGCAGCA	InFrameInsertion	1748	predicted	TIER 2	1	chr6:g.157099446_157099447insACAGCAGCAGCAGCA	chr6:g.157099432G>GCAGCAGCAGCAGCAA	ARID1B	LoF	p.Q127_Q131dupQQQQQ	-/QQQQQ	127	+	ENST00000346085	2250.0	20
35	Very high	BRCA	c.363_364insGCAG	Frameshift	1744	predicted	TIER 1	1	chr6:g.157099426_157099427insGCAG	chr6:g.157099426A>AGCAG	ARID1B	LoF	p.Q122Afs*111	Q/.	122	+	ENST00000346085	2250.0	20
35	Very high	BRCA	c.363_364insG	Frameshift	1743	predicted	TIER 1	1	chr6:g.157099426_157099427insG	chr6:g.157099426A>AG	ARID1B	LoF	p.Q122Afs*110	Q/.	122	+	ENST00000346085	2250.0	20
35	Very high	BRCA	c.378_386dupGCAGCAGCA	InFrameInsertion	1742	predicted	TIER 2	1	chr6:g.157099441_157099449dupGCAGCAGCA	chr6:g.157099426A>ACAGCAGCAG	ARID1B	LoF	p.Q129_Q131dupQQQ	-/QQQ	129	+	ENST00000346085	2250.0	20
35	Very high	BRCA	c.381_386dupGCAGCA	InFrameInsertion	1741	predicted	TIER 2	1	chr6:g.157099444_157099449dupGCAGCA	chr6:g.157099426A>ACAGCAG	ARID1B	LoF	p.Q130_Q131dupQQ	-/QQ	130	+	ENST00000346085	2250.0	20
35	Very high	BRCA	c.384_386dupGCA	InFrameInsertion	1740	predicted	TIER 2	1	chr6:g.157099447_157099449dupGCA	chr6:g.157099426A>ACAG	ARID1B	LoF	p.Q131dupQ	-/Q	131	+	ENST00000346085	2250.0	20
35	Very high	BRCA	c.362_363insGC	Frameshift	1739	predicted	TIER 1	1	chr6:g.157099425_157099426insGC	chr6:g.157099425A>AGC	ARID1B	LoF	p.Q122Hfs*59	Q/.	122	+	ENST00000346085	2250.0	20
35	Very high	BRCA	c.363_365delACA	InFrameDeletion	1736	predicted	TIER 2	1	chr6:g.157099426_157099428delACA	chr6:g.157099423GCAA>G	ARID1B	LoF	p.Q131delQ	Q/-	131	+	ENST00000346085	2250.0	20
35	Very high	BRCA	c.363_365dupACA	InFrameInsertion	1738	predicted	TIER 2	1	chr6:g.157099426_157099428dupACA	chr6:g.157099423G>GCAA	ARID1B	LoF	p.Q131dupQ	-/Q	131	+	ENST00000346085	2250.0	20
35	Very high	BRCA	c.363_368delACAGCA	InFrameDeletion	1735	predicted	TIER 2	1	chr6:g.157099426_157099431delACAGCA	chr6:g.157099420GCAGCAA>G	ARID1B	LoF	p.Q130_Q131delQQ	QQ/-	130	+	ENST00000346085	2250.0	20
35	Very high	BRCA	c.359_360insACAGCA	InFrameInsertion	1729	predicted	TIER 2	1	chr6:g.157099422_157099423insACAGCA	chr6:g.157099417G>GCAGCAA	ARID1B	LoF	p.Q130_Q131dupQQ	-/QQ	130	+	ENST00000346085	2250.0	20
35	Very high	BRCA	c.363_374dupACAGCAGCAGCA	InFrameInsertion	1726	predicted	TIER 2	1	chr6:g.157099426_157099437dupACAGCAGCAGCA	chr6:g.157099414G>GCAGCAGCAGCAA	ARID1B	LoF	p.Q128_Q131dupQQQQ	-/QQQQ	128	+	ENST00000346085	2250.0	20
35	Very high	BRCA	c.363_377dupACAGCAGCAGCAGCA	InFrameInsertion	1723	predicted	TIER 2	1	chr6:g.157099426_157099440dupACAGCAGCAGCAGCA	chr6:g.157099411G>GCAGCAGCAGCAGCAA	ARID1B	LoF	p.Q127_Q131dupQQQQQ	-/QQQQQ	127	+	ENST00000346085	2250.0	20
35	Very high	BRCA	c.363_380dupACAGCAGCAGCAGCAGCA	InFrameInsertion	1720	predicted	TIER 2	1	chr6:g.157099426_157099443dupACAGCAGCAGCAGCAGCA	chr6:g.157099408G>GCAGCAGCAGCAGCAGCAA	ARID1B	LoF	p.Q126_Q131dupQQQQQQ	-/QQQQQQ	126	+	ENST00000346085	2250.0	20
35	Very high	BRCA	c.363_383dupACAGCAGCAGCAGCAGCAGCA	InFrameInsertion	1717	predicted	TIER 2	1	chr6:g.157099426_157099446dupACAGCAGCAGCAGCAGCAGCA	chr6:g.157099405G>GCAGCAGCAGCAGCAGCAGCAA	ARID1B	LoF	p.Q125_Q131dupQQQQQQQ	-/QQQQQQQ	125	+	ENST00000346085	2250.0	20
35	Very high	BRCA	c.354_362delGCAGCAGCA	InFrameDeletion	1713	predicted	TIER 2	1	chr6:g.157099417_157099425delGCAGCAGCA	chr6:g.157099402CCAGCAGCAG>C	ARID1B	LoF	p.Q129_Q131delQQQ	QQQ/-	129	+	ENST00000346085	2250.0	20
35	Very high	BRCA	c.357_362delGCAGCA	InFrameDeletion	1712	predicted	TIER 2	1	chr6:g.157099420_157099425delGCAGCA	chr6:g.157099402CCAGCAG>C	ARID1B	LoF	p.Q130_Q131delQQ	QQ/-	130	+	ENST00000346085	2250.0	20
35	Very high	BRCA	c.360_362delGCA	InFrameDeletion	1711	predicted	TIER 2	1	chr6:g.157099423_157099425delGCA	chr6:g.157099402CCAG>C	ARID1B	LoF	p.Q131delQ	Q/-	131	+	ENST00000346085	2250.0	20
35	Very high	BRCA	c.357_362dupGCAGCA	InFrameInsertion	1709	predicted	TIER 2	1	chr6:g.157099420_157099425dupGCAGCA	chr6:g.157099402C>CCAGCAG	ARID1B	LoF	p.Q130_Q131dupQQ	-/QQ	130	+	ENST00000346085	2250.0	20
35	Very high	BRCA	c.360_362dupGCA	InFrameInsertion	1708	predicted	TIER 2	1	chr6:g.157099423_157099425dupGCA	chr6:g.157099402C>CCAG	ARID1B	LoF	p.Q131dupQ	-/Q	131	+	ENST00000346085	2250.0	20
35	Very high	BRCA	c.1534C>T	Nonsense	4999	predicted	TIER 1	12	chr20:g.31021535C>T	chr20:g.31021535C>T	ASXL1	LoF	p.Q512*	Q/*	512	+	ENST00000375687	1542.0	13
35	Very high	BRCA	c.1429G>T	Nonsense	4968	predicted	TIER 1	12	chr20:g.31021430G>T	chr20:g.31021430G>T	ASXL1	LoF	p.E477*	E/*	477	+	ENST00000375687	1542.0	13
35	Very high	BRCA	c.1347delC	Frameshift	4938	predicted	TIER 1	12	chr20:g.31021348delC	chr20:g.31021347AC>A	ASXL1	LoF	p.Y449*fs*1	Y/.	449	+	ENST00000375687	1542.0	13
35	Very high	BRCA	c.1331C>G	Nonsense	4931	predicted	TIER 1	12	chr20:g.31021332C>G	chr20:g.31021332C>G	ASXL1	LoF	p.S444*	S/*	444	+	ENST00000375687	1542.0	13
35	Very high	BRCA	c.1210C>T	Nonsense	4899	predicted	TIER 1	12	chr20:g.31021211C>T	chr20:g.31021211C>T	ASXL1	LoF	p.R404*	R/*	404	+	ENST00000375687	1542.0	13
35	Very high	BRCA	c.1129C>T	Nonsense	4881	predicted	TIER 1	12	chr20:g.31021130C>T	chr20:g.31021130C>T	ASXL1	LoF	p.Q377*	Q/*	377	+	ENST00000375687	1542.0	13
35	Very high	BRCA	c.1114C>T	Nonsense	4876	predicted	TIER 1	12	chr20:g.31021115C>T	chr20:g.31021115C>T	ASXL1	LoF	p.Q372*	Q/*	372	+	ENST00000375687	1542.0	13
35	Very high	BRCA	c.210_212delGTT	InFrameDeletion	4364	predicted	TIER 2	4	chr20:g.30956884_30956886delGTT	chr20:g.30956880GGTT>G	ASXL1	LoF	p.L70delL	L/-	70	+	ENST00000375687	1542.0	13
35	Very high	BRCA	c.25_27dupAAG	InFrameInsertion	4174	predicted	TIER 2	1	chr20:g.30946603_30946605dupAAG	chr20:g.30946591C>CAGA	ASXL1	LoF	p.K9dupK	-/K	9	+	ENST00000375687	1542.0	13
35	Very high	BRCA	c.897_899delTCT	InFrameDeletion	3895	predicted	TIER 2	2	chr4:g.187630085_187630087delAAG	chr4:g.187630082GAGA>G	FAT1	LoF	p.L300delL	L/-	300	-	ENST00000441802	4589.0	27
35	Very high	BRCA	c.1036C>T	Nonsense	3847	predicted	TIER 1	2	chr4:g.187629946G>A	chr4:g.187629946G>A	FAT1	LoF	p.Q346*	Q/*	346	-	ENST00000441802	4589.0	27
35	Very high	BRCA	c.2078T>G	Nonsense	3522	predicted	TIER 1	2	chr4:g.187628904A>C	chr4:g.187628904A>C	FAT1	LoF	p.L693*	L/*	693	-	ENST00000441802	4589.0	27
35	Very high	BRCA	c.3614G>A	Missense	2985	predicted	TIER 1	4	chr4:g.187560904C>T	chr4:g.187560904C>T	FAT1	LoF	p.R1205Q	R/Q	1205	-	ENST00000441802	4589.0	27
35	Very high	BRCA	c.3994C>T	Missense	2786	predicted	TIER 1	6	chr4:g.187557368G>A	chr4:g.187557368G>A	FAT1	LoF	p.R1332C	R/C	1332	-	ENST00000441802	4589.0	27
35	Very high	BRCA	c.4207G>A	Missense	2694	predicted	TIER 1	7	chr4:g.187554954C>T	chr4:g.187554954C>T	FAT1	LoF	p.D1403N	D/N	1403	-	ENST00000441802	4589.0	27
35	Very high	BRCA	c.4358G>A	Missense	2613	predicted	TIER 1	8	chr4:g.187549883C>T	chr4:g.187549883C>T	FAT1	LoF	p.R1453H	R/H	1453	-	ENST00000441802	4589.0	27
35	Very high	BRCA	c.4534G>A	Missense	2565	predicted	TIER 1	8	chr4:g.187549707C>T	chr4:g.187549707C>T	FAT1	LoF	p.G1512S	G/S	1512	-	ENST00000441802	4589.0	27
35	Very high	BRCA	c.4628G>A	Missense	2491	predicted	TIER 1	9	chr4:g.187549490C>T	chr4:g.187549490C>T	FAT1	LoF	p.R1543H	R/H	1543	-	ENST00000441802	4589.0	27
35	Very high	BRCA	c.5793C>G	Nonsense	2118	predicted	TIER 1	10	chr4:g.187541947G>C	chr4:g.187541947G>C	FAT1	LoF	p.Y1931*	Y/*	1931	-	ENST00000441802	4589.0	27
35	Very high	BRCA	c.5965A>T	Nonsense	2066	predicted	TIER 1	10	chr4:g.187541775T>A	chr4:g.187541775T>A	FAT1	LoF	p.K1989*	K/*	1989	-	ENST00000441802	4589.0	27
35	Very high	BRCA	c.6450T>A	Nonsense	1911	predicted	TIER 1	10	chr4:g.187541290A>T	chr4:g.187541290A>T	FAT1	LoF	p.Y2150*	Y/*	2150	-	ENST00000441802	4589.0	27
35	Very high	BRCA	c.9157C>T	Missense	1074	predicted	TIER 1	12	chr4:g.187535417G>A	chr4:g.187535417G>A	FAT1	LoF	p.R3053C	R/C	3053	-	ENST00000441802	4589.0	27
35	Very high	BRCA	c.9166G>A	Missense	1068	predicted	TIER 1	12	chr4:g.187535408C>T	chr4:g.187535408C>T	FAT1	LoF	p.A3056T	A/T	3056	-	ENST00000441802	4589.0	27
35	Very high	BRCA	c.9697C>T	Missense	835	predicted	TIER 1	14	chr4:g.187532696G>A	chr4:g.187532696G>A	FAT1	LoF	p.R3233C	R/C	3233	-	ENST00000441802	4589.0	27
35	Very high	BRCA	c.9698G>A	Missense	834	predicted	TIER 1	14	chr4:g.187532695C>T	chr4:g.187532695C>T	FAT1	LoF	p.R3233H	R/H	3233	-	ENST00000441802	4589.0	27
35	Very high	BRCA	c.10936C>T	Missense	307	predicted	TIER 1	19	chr4:g.187524744G>A	chr4:g.187524744G>A	FAT1	LoF	p.R3646C	R/C	3646	-	ENST00000441802	4589.0	27
35	Very high	BRCA	c.10994G>A	Missense	286	predicted	TIER 1	19	chr4:g.187524686C>T	chr4:g.187524686C>T	FAT1	LoF	p.R3665Q	R/Q	3665	-	ENST00000441802	4589.0	27
35	Very high	BRCA	c.2699_2701delATT	InFrameDeletion	4901	predicted	TIER 2	1	chr11:g.92087977_92087979delATT	chr11:g.92087973AATT>A	FAT3	ambiguous	p.Y900delY	Y/-	900	+	ENST00000298047	4590.0	27
35	Very high	BRCA	c.587_589delACT	InFrameDeletion	4309	predicted	TIER 2	1	chr11:g.92085865_92085867delACT	chr11:g.92085856TCTA>T	FAT3	ambiguous	p.Y196delY	Y/-	196	+	ENST00000298047	4590.0	27
35	Very high	BRCA	c.944_945insCCCTGGACT	InFrameInsertion	4096	predicted	TIER 2	1	chr4:g.126238510_126238511insCCCTGGACT	chr4:g.126238510C>CCCCTGGACT	FAT4	LoF	p.A315_R316insPGL	-/PGL	315	+	ENST00000394329	4982.0	17
35	Very high	BRCA	c.13186C>T	Missense	3613	predicted	TIER 1	27	chr11:g.92623695C>T	chr11:g.92623695C>T	FAT3	ambiguous	p.R4396C	R/C	4396	+	ENST00000298047	4590.0	27
35	Very high	BRCA	c.12208C>T	Missense	3194	predicted	TIER 1	22	chr11:g.92613977C>T	chr11:g.92613977C>T	FAT3	ambiguous	p.R4070W	R/W	4070	+	ENST00000298047	4590.0	27
35	Very high	BRCA	c.12203C>T	Missense	3193	predicted	TIER 1	22	chr11:g.92613972C>T	chr11:g.92613972C>T	FAT3	ambiguous	p.P4068L	P/L	4068	+	ENST00000298047	4590.0	27
35	Very high	BRCA	c.11902C>T	Missense	3079	predicted	TIER 1	21	chr11:g.92600150C>T	chr11:g.92600150C>T	FAT3	ambiguous	p.R3968C	R/C	3968	+	ENST00000298047	4590.0	27
35	Very high	BRCA	c.11591G>A	Missense	2964	predicted	TIER 1	20	chr11:g.92592421G>A	chr11:g.92592421G>A	FAT3	ambiguous	p.R3864H	R/H	3864	+	ENST00000298047	4590.0	27
35	Very high	BRCA	c.11546G>A	Missense	2951	predicted	TIER 1	20	chr11:g.92592376G>A	chr11:g.92592376G>A	FAT3	ambiguous	p.R3849Q	R/Q	3849	+	ENST00000298047	4590.0	27
35	Very high	BRCA	c.11545C>T	Missense	2950	predicted	TIER 1	20	chr11:g.92592375C>T	chr11:g.92592375C>T	FAT3	ambiguous	p.R3849W	R/W	3849	+	ENST00000298047	4590.0	27
35	Very high	BRCA	c.10954C>T	Missense	2695	predicted	TIER 1	18	chr11:g.92577487C>T	chr11:g.92577487C>T	FAT3	ambiguous	p.R3652C	R/C	3652	+	ENST00000298047	4590.0	27
35	Very high	BRCA	c.10876C>T	Missense	2669	predicted	TIER 1	18	chr11:g.92577409C>T	chr11:g.92577409C>T	FAT3	ambiguous	p.R3626C	R/C	3626	+	ENST00000298047	4590.0	27
35	Very high	BRCA	c.10222C>T	Missense	2368	predicted	TIER 1	15	chr11:g.92569867C>T	chr11:g.92569867C>T	FAT3	ambiguous	p.R3408W	R/W	3408	+	ENST00000298047	4590.0	27
35	Very high	BRCA	c.10153C>T	Missense	2350	predicted	TIER 1	15	chr11:g.92569798C>T	chr11:g.92569798C>T	FAT3	ambiguous	p.R3385W	R/W	3385	+	ENST00000298047	4590.0	27
35	Very high	BRCA	c.5176C>T	Nonsense	869	predicted	TIER 2	9	chr11:g.92531355C>T	chr11:g.92531355C>T	FAT3	ambiguous	p.Q1726*	Q/*	1726	+	ENST00000298047	4590.0	27
35	Very high	BRCA	c.4528C>T	Missense	648	predicted	TIER 1	7	chr11:g.92523301C>T	chr11:g.92523301C>T	FAT3	ambiguous	p.R1510W	R/W	1510	+	ENST00000298047	4590.0	27
35	Very high	BRCA	c.10G>T	Nonsense	4322	predicted	TIER 1	1	chr7:g.152132862C>A	chr7:g.152132862C>A	MLL3	LoF	p.E4*	E/*	4	-	ENST00000262189	4912.0	59
35	Very high	BRCA	c.2522G>A	Missense	3390	predicted	TIER 1	14	chr7:g.151944997C>T	chr7:g.151944997C>T	MLL3	LoF	p.R841Q	R/Q	841	-	ENST00000262189	4912.0	59
35	Very high	BRCA	c.2656C>T	Missense	3324	predicted	TIER 1	16	chr7:g.151933015G>A	chr7:g.151933015G>A	MLL3	LoF	p.R886C	R/C	886	-	ENST00000262189	4912.0	59
35	Very high	BRCA	c.2711G>A	Missense	3311	predicted	TIER 1	16	chr7:g.151932960C>T	chr7:g.151932960C>T	MLL3	LoF	p.R904Q	R/Q	904	-	ENST00000262189	4912.0	59
35	Very high	BRCA	c.3760C>T	Missense	2885	predicted	TIER 1	24	chr7:g.151904466G>A	chr7:g.151904466G>A	MLL3	LoF	p.R1254W	R/W	1254	-	ENST00000262189	4912.0	59
35	Very high	BRCA	c.3761G>A	Missense	2884	predicted	TIER 1	24	chr7:g.151904465C>T	chr7:g.151904465C>T	MLL3	LoF	p.R1254Q	R/Q	1254	-	ENST00000262189	4912.0	59
35	Very high	BRCA	c.4442G>A	Missense	2589	predicted	TIER 1	29	chr7:g.151891590C>T	chr7:g.151891590C>T	MLL3	LoF	p.R1481Q	R/Q	1481	-	ENST00000262189	4912.0	59
35	Very high	BRCA	c.6415C>T	Nonsense	1871	predicted	TIER 1	36	chr7:g.151878530G>A	chr7:g.151878530G>A	MLL3	LoF	p.R2139*	R/*	2139	-	ENST00000262189	4912.0	59
35	Very high	BRCA	c.9650G>A	Missense	815	predicted	TIER 1	42	chr7:g.151864331C>T	chr7:g.151864331C>T	MLL3	LoF	p.R3217H	R/H	3217	-	ENST00000262189	4912.0	59
35	Very high	BRCA	c.9670C>T	Missense	812	predicted	TIER 1	42	chr7:g.151864311G>A	chr7:g.151864311G>A	MLL3	LoF	p.R3224C	R/C	3224	-	ENST00000262189	4912.0	59
35	Very high	BRCA	c.9671G>A	Missense	811	predicted	TIER 1	42	chr7:g.151864310C>T	chr7:g.151864310C>T	MLL3	LoF	p.R3224H	R/H	3224	-	ENST00000262189	4912.0	59
35	Very high	BRCA	c.11549G>A	Missense	214	predicted	TIER 1	44	chr7:g.151856069C>T	chr7:g.151856069C>T	MLL3	LoF	p.R3850Q	R/Q	3850	-	ENST00000262189	4912.0	59
35	Very high	BRCA	c.11558G>A	Missense	211	predicted	TIER 1	44	chr7:g.151856060C>T	chr7:g.151856060C>T	MLL3	LoF	p.R3853Q	R/Q	3853	-	ENST00000262189	4912.0	59
35	Very high	BRCA	c.11590C>T	Missense	202	predicted	TIER 1	44	chr7:g.151856028G>A	chr7:g.151856028G>A	MLL3	LoF	p.R3864C	R/C	3864	-	ENST00000262189	4912.0	59
35	Very high	BRCA	c.11591G>A	Missense	201	predicted	TIER 1	44	chr7:g.151856027C>T	chr7:g.151856027C>T	MLL3	LoF	p.R3864H	R/H	3864	-	ENST00000262189	4912.0	59
35	Very high	BRCA	c.965_973dupTGTGCCGGG	InFrameInsertion	4975	predicted	TIER 2	8	chr12:g.49446845_49446853dupACCCGGCAC	chr12:g.49446836G>GCCCGGCACA	MLL2	LoF	p.V322_R324dupVCR	-/VCR	322	-	ENST00000301067	5538.0	54
35	Very high	BRCA	c.1309_1311delGAG	InFrameDeletion	4822	predicted	TIER 2	10	chr12:g.49446158_49446160delCTC	chr12:g.49446154TCTC>T	MLL2	LoF	p.E437delE	E/-	437	-	ENST00000301067	5538.0	54
35	Very high	BRCA	c.1364_1390delAATCACCCACGTCCCCACCACCTGAGG	InFrameDeletion	4797	predicted	TIER 2	10	chr12:g.49446093_49446119delGTGGGTGATTCCTCAGGTGGTGGGGAC	chr12:g.49446075GCCTCAGGTGGTGGGGACGTGGGTGATT>G	MLL2	LoF	p.E455_E463delESPTSPPPE	ESPTSPPPE/-	455	-	ENST00000301067	5538.0	54
35	Very high	BRCA	c.1377_1403delCCCACCACCTGAGGCATCACGCCTGTC	InFrameDeletion	4795	predicted	TIER 2	10	chr12:g.49446066_49446092delAGGCGTGATGCCTCAGGTGGTGGGGAC	chr12:g.49446062TGACAGGCGTGATGCCTCAGGTGGTGGG>T	MLL2	LoF	p.A464_E472delASRLSPPPE	ASRLSPPPE/-	464	-	ENST00000301067	5538.0	54
35	Very high	BRCA	c.1410_1412dupACC	InFrameInsertion	4788	predicted	TIER 2	10	chr12:g.49446061_49446063dupGTG	chr12:g.49446053A>AGGT	MLL2	LoF	p.P471dupP	-/P	471	-	ENST00000301067	5538.0	54
35	Very high	BRCA	c.1367_1420dupCACCCACGTCCCCACCACCTGAGGCATCACGCCTGTCACCACCACCTGAGGAAT	InFrameInsertion	4786	predicted	TIER 2	10	chr12:g.49446062_49446115dupTGACAGGCGTGATGCCTCAGGTGGTGGGGACGTGGGTGATTCCTCAGGTGGTGG	chr12:g.49446045A>AATTCCTCAGGTGGTGGTGACAGGCGTGATGCCTCAGGTGGTGGGGACGTGGGTG	MLL2	LoF	p.S456_E473dupSPTSPPPEASRLSPPPEE	-/SPTSPPPEASRLSPPPEE	456	-	ENST00000301067	5538.0	54
35	Very high	BRCA	c.1549_1551delGAG	InFrameDeletion	4738	predicted	TIER 2	10	chr12:g.49445919_49445921delTCC	chr12:g.49445914ACTC>A	MLL2	LoF	p.E517delE	E/-	517	-	ENST00000301067	5538.0	54
35	Very high	BRCA	c.1554_1577delGCCCTTGTCTCCACCGGAAGAGTC	InFrameDeletion	4731	predicted	TIER 2	10	chr12:g.49445894_49445917delTTCCGGTGGAGACAAGGGCGACTC	chr12:g.49445888TGACTCTTCCGGTGGAGACAAGGGC>T	MLL2	LoF	p.L520_P527delLSPPEESP	LSPPEESP/-	520	-	ENST00000301067	5538.0	54
35	Very high	BRCA	c.1558_1581delTTGTCTCCACCGGAAGAGTCACCC	InFrameDeletion	4728	predicted	TIER 2	10	chr12:g.49445888_49445911delTGACTCTTCCGGTGGAGACAAGGG	chr12:g.49445884GGGGTGACTCTTCCGGTGGAGACAA>G	MLL2	LoF	p.L520_P527delLSPPEESP	LSPPEESP/-	520	-	ENST00000301067	5538.0	54
35	Very high	BRCA	c.1893_1919delGGACTCGCCTATGTCCCCACCACCTGA	InFrameDeletion	4629	predicted	TIER 2	10	chr12:g.49445563_49445589delTAGGCGAGTCCTCAGGTGGTGGGGACA	chr12:g.49445546TTCAGGTGGTGGGGACATAGGCGAGTCC>T	MLL2	LoF	p.D632_E640delDSPMSPPPE	DSPMSPPPE/-	632	-	ENST00000301067	5538.0	54
35	Very high	BRCA	c.1911_1937delACCACCTGAAGAATCACCTATGTCCCC	InFrameDeletion	4623	predicted	TIER 2	10	chr12:g.49445540_49445566delTGATTCTTCAGGTGGTGGGGACATAGG	chr12:g.49445528GGGGGACATAGGTGATTCTTCAGGTGGT>G	MLL2	LoF	p.E641_E649delESPMSPPPE	ESPMSPPPE/-	641	-	ENST00000301067	5538.0	54
35	Very high	BRCA	c.1920_1946delAGAATCACCTATGTCCCCCCCACCTGA	InFrameDeletion	4616	predicted	TIER 2	10	chr12:g.49445528_49445554delGGGGGACATAGGTGATTCTTCAGGTGG	chr12:g.49445519CTCAGGTGGGGGGGACATAGGTGATTCT>C	MLL2	LoF	p.E641_E649delESPMSPPPE	ESPMSPPPE/-	641	-	ENST00000301067	5538.0	54
35	Very high	BRCA	c.2088_2114delCCCCACATCCCCACCACCTGAGGACTC	InFrameDeletion	4557	predicted	TIER 2	10	chr12:g.49445372_49445398delTGTGGGGGAGTCCTCAGGTGGTGGGGA	chr12:g.49445351TGAGTCCTCAGGTGGTGGGGATGTGGGG>T	MLL2	LoF	p.T698_P706delTSPPPEDSP	TSPPPEDSP/-	698	-	ENST00000301067	5538.0	54
35	Very high	BRCA	c.2232_2258dupACCCCGGCCTGAGGAGCCGCACCTGTC	InFrameInsertion	4498	predicted	TIER 2	10	chr12:g.49445220_49445246dupTCCTCAGGCCGGGGTGACAGGTGCGGC	chr12:g.49445207G>GGACAGGTGCGGCTCCTCAGGCCGGGGT	MLL2	LoF	p.R755_P763dupRPEEPHLSP	-/RPEEPHLSP	755	-	ENST00000301067	5538.0	54
[truncated: 16,514 more rows]

## Sheet: ST3
Supplementary Table 3. Known and predicted oncogenic variants and CADD phred scores in prostate cancer
cadd_phred	cadd_phred (Category)	cancer	cdna	consequence	default_id	driver	driver_mut_prediction	exon	gdna	CGI_format	gene	gene_role	protein	protein_change	protein_pos	strand	transcript	transcript_aminoacids	transcript_exons
59	Very high	PRCA	c.12691G>T	Nonsense	283	predicted	TIER 1	83	chr2:g.141072618C>A	chr2:g.141072618C>A	LRP1B	LoF	p.E4231*	E/*	4231	-	ENST00000389484	4600.0	91
59	Very high	PRCA	c.13069G>T	Nonsense	130	predicted	TIER 1	85	chr2:g.141032066C>A	chr2:g.141032066C>A	LRP1B	LoF	p.E4357*	E/*	4357	-	ENST00000389484	4600.0	91
59	Very high	PRCA	c.13118_13123delAAGACA	InFrameDeletion	114	predicted	TIER 2	85	chr2:g.141032013_141032018delGTCTTT	chr2:g.141032011CTGTCTT>C	LRP1B	LoF	p.K4373_D4374delKD	KD/-	4373	-	ENST00000389484	4600.0	91
58	Very high	PRCA	c.10097_10100delAAGA	Frameshift	2761	predicted	TIER 2	15	chr11:g.92569742_92569745delAAGA	chr11:g.92569741GAAGA>G	FAT3	ambiguous	p.E3366Vfs*2	E/.	3366	+	ENST00000298047	4590.0	27
58	Very high	PRCA	c.14491_14498delAAGAAGGG	Frameshift	4052	predicted	TIER 1	46	chr12:g.49421809_49421816delCCCTTCTT	chr12:g.49421808CCCCTTCTT>C	MLL2	LoF	p.K4831Gfs*3	K/.	4831	-	ENST00000301067	5538.0	54
58	Very high	PRCA	c.10162G>T	Nonsense	1482	predicted	TIER 1	64	chr2:g.141202144C>A	chr2:g.141202144C>A	LRP1B	LoF	p.E3388*	E/*	3388	-	ENST00000389484	4600.0	91
58	Very high	PRCA	c.12381_12392dupTATATATGGAGC	InFrameInsertion	435	predicted	TIER 2	81	chr2:g.141081584_141081595dupGCTCCATATATA	chr2:g.141081583T>TGCTCCATATATA	LRP1B	LoF	p.I4128_A4131dupIYGA	-/IYGA	4128	-	ENST00000389484	4600.0	91
58	Very high	PRCA	c.12446_12454dupAGTACTTAG	InFrameInsertion	414	predicted	TIER 2	81	chr2:g.141081525_141081533dupAGTACTCTA	chr2:g.141081521G>GCTAAGTACT	LRP1B	LoF	p.E4149_L4151dupEYL	-/EYL	4149	-	ENST00000389484	4600.0	91
58	Very high	PRCA	c.12871G>T	Nonsense	3193	predicted	TIER 1	16	chr4:g.126408554G>T	chr4:g.126408554G>T	FAT4	LoF	p.E4291*	E/*	4291	+	ENST00000394329	4982.0	17
57	Very high	PRCA	c.12380_12409delTCAGTAGCCACAGAATCAACCCGGGTTTGG	InFrameDeletion	1827	predicted	TIER 2	49	chr7:g.151849915_151849944delGGGTTGATTCTGTGGCTACTGACCAAACCC	chr7:g.151849906TCCAAACCCGGGTTGATTCTGTGGCTACTGA>T	MLL3	LoF	p.V4127_L4136delVSSHRINPGL	VSSHRINPGL/-	4127	-	ENST00000262189	4912.0	59
57	Very high	PRCA	c.14168_14169insTAA	InFrameInsertion	1293	predicted	TIER 2	54	chr7:g.151842243_151842244insTTA	chr7:g.151842243C>CTTA	MLL3	LoF	p.V4723_L4724insK	-/K	4723	-	ENST00000262189	4912.0	59
57	Very high	PRCA	c.8527C>T	Nonsense	2194	predicted	TIER 1	54	chr2:g.141260667G>A	chr2:g.141260667G>A	LRP1B	LoF	p.R2843*	R/*	2843	-	ENST00000389484	4600.0	91
57	Very high	PRCA	c.8683G>T	Nonsense	1169	predicted	TIER 1	60	chr11:g.108224504G>T	chr11:g.108224504G>T	ATM	LoF	p.E2895*	E/*	2895	+	ENST00000278616	3057.0	63
57	Very high	PRCA	c.10722_10725delAGAG	Frameshift	2434	predicted	TIER 1	9	chr4:g.126372893_126372896delAGAG	chr4:g.126372890CAGAG>C	FAT4	LoF	p.R3574Sfs*31	R/.	3574	+	ENST00000394329	4982.0	17
56	Very high	PRCA	c.12532_12534delAAG	InFrameDeletion	3752	predicted	TIER 2	23	chr11:g.92616154_92616156delAAG	chr11:g.92616150CAAG>C	FAT3	ambiguous	p.K4178delK	K/-	4178	+	ENST00000298047	4590.0	27
56	Very high	PRCA	c.9177G>A	Nonsense	1860	predicted	TIER 1	58	chr2:g.141245252C>T	chr2:g.141245252C>T	LRP1B	LoF	p.W3059*	W/*	3059	-	ENST00000389484	4600.0	91
56	Very high	PRCA	c.13213C>T	Nonsense	71	predicted	TIER 1	86	chr2:g.141027845G>A	chr2:g.141027845G>A	LRP1B	LoF	p.Q4405*	Q/*	4405	-	ENST00000389484	4600.0	91
56	Very high	PRCA	c.8748_8750dupCCT	InFrameInsertion	603	predicted	TIER 2	21	chr13:g.32950922_32950924dupCCT	chr13:g.32950921A>ACCT	BRCA2	LoF	p.L2917dupL	-/L	2917	+	ENST00000380152	3419.0	27
56	Very high	PRCA	c.8249_8251delAGA	InFrameDeletion	352	predicted	TIER 2	18	chr13:g.32937588_32937590delAGA	chr13:g.32937584CAGA>C	BRCA2	LoF	p.K2750delK	K/-	2750	+	ENST00000380152	3419.0	27
56	Very high	PRCA	c.13619_13620insAAA	InFrameInsertion	3432	predicted	TIER 2	17	chr4:g.126411596_126411597insAAA	chr4:g.126411595G>GAAA	FAT4	LoF	p.K4542dupK	-/K	4542	+	ENST00000394329	4982.0	17
56	Very high	PRCA	c.11053_11069delAGCAATGATGGAGTTCA	Frameshift	2518	predicted	TIER 1	9	chr4:g.126373224_126373240delAGCAATGATGGAGTTCA	chr4:g.126373223TAGCAATGATGGAGTTCA>T	FAT4	LoF	p.S3685Qfs*21	S/.	3685	+	ENST00000394329	4982.0	17
56	Very high	PRCA	c.4246_4247dupGA	Frameshift	2057	predicted	TIER 2	35	chr8:g.69069571_69069572dupGA	chr8:g.69069570G>GGA	PREX2	ambiguous	p.G1417Kfs*18	G/.	1417	+	ENST00000288368	1607.0	40
56	Very high	PRCA	c.3692_3712delCTCTTGCTCAGAACATCAGGA	InFrameDeletion	1755	predicted	TIER 2	30	chr8:g.69033252_69033272delCTCTTGCTCAGAACATCAGGA	chr8:g.69033248CGGACTCTTGCTCAGAACATCA>C	PREX2	ambiguous	p.T1231_R1237delTLAQNIR	TLAQNIR/-	1231	+	ENST00000288368	1607.0	40
55	Very high	PRCA	c.11659C>T	Nonsense	434	predicted	TIER 1	22	chr4:g.187521496G>A	chr4:g.187521496G>A	FAT1	LoF	p.Q3887*	Q/*	3887	-	ENST00000441802	4589.0	27
55	Very high	PRCA	c.13144C>T	Nonsense	4005	predicted	TIER 2	26	chr11:g.92623054C>T	chr11:g.92623054C>T	FAT3	ambiguous	p.R4382*	R/*	4382	+	ENST00000298047	4590.0	27
55	Very high	PRCA	c.10480_10482delGAG	InFrameDeletion	2927	predicted	TIER 2	17	chr11:g.92573839_92573841delGAG	chr11:g.92573832AGAG>A	FAT3	ambiguous	p.E3494delE	E/-	3494	+	ENST00000298047	4590.0	27
55	Very high	PRCA	c.9731_9736dupTTCAGA	InFrameInsertion	2815	predicted	TIER 2	42	chr7:g.151864245_151864250dupTCTGAA	chr7:g.151864244T>TTCTGAA	MLL3	LoF	p.Q3245_K3246insIQ	-/IQ	3245	-	ENST00000262189	4912.0	59
55	Very high	PRCA	c.14129_14130insAGGGCCCCCAAAG	Frameshift	1299	predicted	TIER 1	54	chr7:g.151842283_151842284insTTTGGGGGCCCTC	chr7:g.151842282A>ACTTTGGGGGCCCT	MLL3	LoF	p.S4711Gfs*6	S/.	4711	-	ENST00000262189	4912.0	59
55	Very high	PRCA	c.14147_14149delGGG	InFrameDeletion	4215	predicted	TIER 2	44	chr12:g.49422948_49422950delCCC	chr12:g.49422945TCCC>T	MLL2	LoF	p.G4716delG	G/-	4716	-	ENST00000301067	5538.0	54
55	Very high	PRCA	c.12400A>T	Nonsense	430	predicted	TIER 1	81	chr2:g.141081576T>A	chr2:g.141081576T>A	LRP1B	LoF	p.K4134*	K/*	4134	-	ENST00000389484	4600.0	91
55	Very high	PRCA	c.12415C>T	Nonsense	428	predicted	TIER 1	81	chr2:g.141081561G>A	chr2:g.141081561G>A	LRP1B	LoF	p.R4139*	R/*	4139	-	ENST00000389484	4600.0	91
55	Very high	PRCA	c.8545C>T	Nonsense	1068	predicted	TIER 1	58	chr11:g.108216596C>T	chr11:g.108216596C>T	ATM	LoF	p.R2849*	R/*	2849	+	ENST00000278616	3057.0	63
55	Very high	PRCA	c.8303_8306delAATG	Frameshift	995	predicted	TIER 1	57	chr11:g.108213983_108213986delAATG	chr11:g.108213980TTGAA>T	ATM	LoF	p.E2768Gfs*37	E/.	2768	+	ENST00000278616	3057.0	63
55	Very high	PRCA	c.8537_8538delAG	Frameshift	489	predicted	TIER 1	20	chr13:g.32945142_32945143delAG	chr13:g.32945137AAG>A	BRCA2	LoF	p.E2846Gfs*22	E/.	2846	+	ENST00000380152	3419.0	27
55	Very high	PRCA	c.5389_5428delTCCCGAACAGTAAGGCAGTTCCAGTTCACTGACTGGCCAG	Frameshift	3061	predicted	TIER 1	43	chr9:g.8331694_8331733delAGTCAGTGAACTGGAACTGCCTTACTGTTCGGGACTGGCC	chr9:g.8331687TCTGGCCAGTCAGTGAACTGGAACTGCCTTACTGTTCGGGA>T	PTPRD	LoF	p.R1798Kfs*45	R/.	1798	-	ENST00000381196	1913.0	43
55	Very high	PRCA	c.3965C>A	Nonsense	1896	predicted	TIER 2	32	chr8:g.69046492C>A	chr8:g.69046492C>A	PREX2	ambiguous	p.S1322*	S/*	1322	+	ENST00000288368	1607.0	40
54	Very high	PRCA	c.12534_12548delGGTCTTCCGCAAGAA	InFrameDeletion	3749	predicted	TIER 2	23	chr11:g.92616156_92616170delGGTCTTCCGCAAGAA	chr11:g.92616141AGTCTTCCGCAAGAAG>A	FAT3	ambiguous	p.K4178_K4182delKVFRK	KVFRK/-	4178	+	ENST00000298047	4590.0	27
54	Very high	PRCA	c.12316delG	Frameshift	3674	predicted	TIER 2	23	chr11:g.92615938delG	chr11:g.92615936AG>A	FAT3	ambiguous	p.E4106Sfs*9	E/.	4106	+	ENST00000298047	4590.0	27
54	Very high	PRCA	c.11568_11570delAGA	InFrameDeletion	3378	predicted	TIER 2	20	chr11:g.92592398_92592400delAGA	chr11:g.92592393AAAG>A	FAT3	ambiguous	p.E3857delE	E/-	3857	+	ENST00000298047	4590.0	27
54	Very high	PRCA	c.16047delC	Frameshift	3589	predicted	TIER 1	50	chr12:g.49418366delG	chr12:g.49418365TG>T	MLL2	LoF	p.Y5349*fs*1	Y/.	5349	-	ENST00000301067	5538.0	54
54	Very high	PRCA	c.9040G>T	Nonsense	1932	predicted	TIER 1	57	chr2:g.141250257C>A	chr2:g.141250257C>A	LRP1B	LoF	p.E3014*	E/*	3014	-	ENST00000389484	4600.0	91
54	Very high	PRCA	c.10444C>T	Nonsense	1322	predicted	TIER 1	67	chr2:g.141143549G>A	chr2:g.141143549G>A	LRP1B	LoF	p.Q3482*	Q/*	3482	-	ENST00000389484	4600.0	91
54	Very high	PRCA	c.8266A>T	Nonsense	952	known	TIER 1	56	chr11:g.108206686A>T	chr11:g.108206686A>T	ATM	LoF	p.K2756*	K/*	2756	+	ENST00000278616	3057.0	63
54	Very high	PRCA	c.8638G>T	Nonsense	1127	predicted	TIER 1	59	chr11:g.108218059G>T	chr11:g.108218059G>T	ATM	LoF	p.E2880*	E/*	2880	+	ENST00000278616	3057.0	63
54	Very high	PRCA	c.8284C>T	Nonsense	990	predicted	TIER 1	57	chr11:g.108213964C>T	chr11:g.108213964C>T	ATM	LoF	p.Q2762*	Q/*	2762	+	ENST00000278616	3057.0	63
54	Very high	PRCA	c.8281_8284delTCTC	Frameshift	986	predicted	TIER 1	57	chr11:g.108213961_108213964delTCTC	chr11:g.108213957CCTCT>C	ATM	LoF	p.Q2762Efs*43	Q/.	2762	+	ENST00000278616	3057.0	63
54	Very high	PRCA	c.8264_8268delATAAG	SpliceDonorDeletion	950	predicted	TIER 1	56	chr11:g.108206684_108206688delATAAG	chr11:g.108206683TATAAG>T	ATM	LoF	.	./.	.	+	ENST00000278616	3057.0	63
54	Very high	PRCA	c.8248_8268delTTAACTATCTGTACTTATAAG	SpliceDonorDeletion	943	predicted	TIER 1	56	chr11:g.108206668_108206688delTTAACTATCTGTACTTATAAG	chr11:g.108206667ATTAACTATCTGTACTTATAAG>A	ATM	LoF	.	./.	.	+	ENST00000278616	3057.0	63
54	Very high	PRCA	c.9382C>T	Nonsense	882	known	TIER 1	25	chr13:g.32968951C>T	chr13:g.32968951C>T	BRCA2	LoF	p.R3128*	R/*	3128	+	ENST00000380152	3419.0	27
54	Very high	PRCA	c.7933A>T	Nonsense	222	predicted	TIER 1	17	chr13:g.32936787A>T	chr13:g.32936787A>T	BRCA2	LoF	p.R2645*	R/*	2645	+	ENST00000380152	3419.0	27
54	Very high	PRCA	c.3583C>T	Nonsense	1699	predicted	TIER 2	29	chr8:g.69032509C>T	chr8:g.69032509C>T	PREX2	ambiguous	p.R1195*	R/*	1195	+	ENST00000288368	1607.0	40
53	Very high	PRCA	c.10993C>T	Nonsense	710	predicted	TIER 1	19	chr4:g.187524687G>A	chr4:g.187524687G>A	FAT1	LoF	p.R3665*	R/*	3665	-	ENST00000441802	4589.0	27
53	Very high	PRCA	c.8908C>T	Nonsense	2346	predicted	TIER 2	10	chr11:g.92538330C>T	chr11:g.92538330C>T	FAT3	ambiguous	p.R2970*	R/*	2970	+	ENST00000298047	4590.0	27
53	Very high	PRCA	c.11616_11618delAGA	InFrameDeletion	2206	predicted	TIER 2	44	chr7:g.151856002_151856004delTTC	chr7:g.151855999CTCT>C	MLL3	LoF	p.E3874delE	E/-	3874	-	ENST00000262189	4912.0	59
53	Very high	PRCA	c.15700G>T	Nonsense	3710	predicted	TIER 1	48	chr12:g.49420049C>A	chr12:g.49420049C>A	MLL2	LoF	p.E5234*	E/*	5234	-	ENST00000301067	5538.0	54
53	Very high	PRCA	c.8137G>T	Nonsense	2450	predicted	TIER 1	50	chr2:g.141274470C>A	chr2:g.141274470C>A	LRP1B	LoF	p.E2713*	E/*	2713	-	ENST00000389484	4600.0	91
53	Very high	PRCA	c.9163G>T	Nonsense	1864	predicted	TIER 1	58	chr2:g.141245266C>A	chr2:g.141245266C>A	LRP1B	LoF	p.E3055*	E/*	3055	-	ENST00000389484	4600.0	91
53	Very high	PRCA	c.9791_9792dupAT	Frameshift	1614	predicted	TIER 1	61	chr2:g.141215055_141215056dupTA	chr2:g.141215053G>GAT	LRP1B	LoF	p.H3265Ifs*15	H/.	3265	-	ENST00000389484	4600.0	91
53	Very high	PRCA	c.11719_11721delTAC	InFrameDeletion	729	predicted	TIER 2	77	chr2:g.141108539_141108541delAGT	chr2:g.141108536TGTA>T	LRP1B	LoF	p.Y3907delY	Y/-	3907	-	ENST00000389484	4600.0	91
53	Very high	PRCA	c.5932G>T	Nonsense	4851	known	TIER 1	40	chr11:g.108183151G>T	chr11:g.108183151G>T	ATM	LoF	p.E1978*	E/*	1978	+	ENST00000278616	3057.0	63
53	Very high	PRCA	c.9486_9488delGAA	MultiAAMissense	913	predicted	TIER 1	25	chr13:g.32969055_32969057delGAA	chr13:g.32969054TGAA>T	BRCA2	LoF	p.M3162_K3163delinsI	insI/-	3162	+	ENST00000380152	3419.0	27
53	Very high	PRCA	c.7708_7716delAAGGAAAGT	InFrameDeletion	145	predicted	TIER 2	16	chr13:g.32931969_32931977delAAGGAAAGT	chr13:g.32931966GGTAAGGAAA>G	BRCA2	LoF	p.K2570_S2572delKES	KES/-	2570	+	ENST00000380152	3419.0	27
53	Very high	PRCA	c.1657G>T	Nonsense	804	predicted	TIER 2	16	chr8:g.68992692G>T	chr8:g.68992692G>T	PREX2	ambiguous	p.E553*	E/*	553	+	ENST00000288368	1607.0	40
52	Very high	PRCA	c.3224_3226dupGGA	InFrameInsertion	4594	predicted	TIER 2	22	chrX:g.44941974_44941976dupGGA	chrX:g.44941964G>GGGA	KDM6A	LoF	p.R1075dupR	-/R	1075	+	ENST00000377967	1402.0	29
52	Very high	PRCA	c.5720C>G	Nonsense	3617	predicted	TIER 1	35	chr2:g.141526820G>C	chr2:g.141526820G>C	LRP1B	LoF	p.S1907*	S/*	1907	-	ENST00000389484	4600.0	91
52	Very high	PRCA	c.8050G>T	Nonsense	2474	predicted	TIER 1	50	chr2:g.141274557C>A	chr2:g.141274557C>A	LRP1B	LoF	p.E2684*	E/*	2684	-	ENST00000389484	4600.0	91
52	Very high	PRCA	c.6859_6863delAGAAA	Frameshift	4787	predicted	TIER 1	12	chr13:g.32918712_32918716delAGAAA	chr13:g.32918708CAAAAG>C	BRCA2	LoF	p.R2287Lfs*4	R/.	2287	+	ENST00000380152	3419.0	27
52	Very high	PRCA	c.9127G>T	Nonsense	782	known	TIER 1	24	chr13:g.32954153G>T	chr13:g.32954153G>T	BRCA2	LoF	p.E3043*	E/*	3043	+	ENST00000380152	3419.0	27
52	Very high	PRCA	c.8575delC	Frameshift	504	predicted	TIER 1	20	chr13:g.32945180delC	chr13:g.32945179AC>A	BRCA2	LoF	p.Q2859Kfs*4	Q/.	2859	+	ENST00000380152	3419.0	27
52	Very high	PRCA	c.2574delC	Frameshift	1196	predicted	TIER 1	22	chr2:g.25458599delG	chr2:g.25458598AG>A	DNMT3A	LoF	p.L859Yfs*22	L/.	859	-	ENST00000264709	913.0	23
52	Very high	PRCA	c.5239_5241dupCGT	InFrameInsertion	3226	predicted	TIER 2	41	chr9:g.8340355_8340357dupACG	chr9:g.8340354C>CACG	PTPRD	LoF	p.R1747dupR	-/R	1747	-	ENST00000381196	1913.0	43
51	Very high	PRCA	c.12886C>T	Nonsense	4969	predicted	TIER 1	25	chr4:g.187517808G>A	chr4:g.187517808G>A	FAT1	LoF	p.R4296*	R/*	4296	-	ENST00000441802	4589.0	27
51	Very high	PRCA	c.13610_13627delTGTCTGTGTACGCCTCCA	InFrameDeletion	4504	predicted	TIER 2	27	chr4:g.187509889_187509906delAGGCGTACACAGACATGG	chr4:g.187509885GTGGAGGCGTACACAGACA>G	FAT1	LoF	p.M4537_S4542delMSVYAS	MSVYAS/-	4537	-	ENST00000441802	4589.0	27
51	Very high	PRCA	c.10672_10674delGAA	InFrameDeletion	817	predicted	TIER 2	19	chr4:g.187525010_187525012delTCT	chr4:g.187525005ATTC>A	FAT1	LoF	p.E3558delE	E/-	3558	-	ENST00000441802	4589.0	27
51	Very high	PRCA	c.10213A>T	Nonsense	1437	predicted	TIER 1	65	chr2:g.141201980T>A	chr2:g.141201980T>A	LRP1B	LoF	p.K3405*	K/*	3405	-	ENST00000389484	4600.0	91
51	Very high	PRCA	c.8185C>T	Nonsense	927	known	TIER 1	56	chr11:g.108206605C>T	chr11:g.108206605C>T	ATM	LoF	p.Q2729*	Q/*	2729	+	ENST00000278616	3057.0	63
51	Very high	PRCA	c.8307G>A	Nonsense	997	predicted	TIER 1	57	chr11:g.108213987G>A	chr11:g.108213987G>A	ATM	LoF	p.W2769*	W/*	2769	+	ENST00000278616	3057.0	63
51	Very high	PRCA	c.8005_8007delAGA	InFrameDeletion	273	predicted	TIER 2	18	chr13:g.32937344_32937346delAGA	chr13:g.32937340CAGA>C	BRCA2	LoF	p.R2669delR	R/-	2669	+	ENST00000380152	3419.0	27
51	Very high	PRCA	c.2463_2477delACCAACAAAAATGAC	InFrameDeletion	1086	predicted	TIER 2	23	chr13:g.49039478_49039492delACCAACAAAAATGAC	chr13:g.49039475AACACCAACAAAAATG>A	RB1	LoF	p.T823_P827delTKMTP	TKMTP/-	823	+	ENST00000267163	929.0	27
50	Very high	PRCA	c.12295A>T	Nonsense	180	predicted	TIER 1	24	chr4:g.187518909T>A	chr4:g.187518909T>A	FAT1	LoF	p.K4099*	K/*	4099	-	ENST00000441802	4589.0	27
50	Very high	PRCA	c.7013_7014insGAAATTCC	Frameshift	3014	predicted	TIER 1	43	chr2:g.141356380_141356381insGGAATTTC	chr2:g.141356380A>AGGAATTTC	LRP1B	LoF	p.N2338Kfs*11	N/.	2338	-	ENST00000389484	4600.0	91
50	Very high	PRCA	c.5989_5991delGTT	InFrameDeletion	499	predicted	TIER 2	38	chr17:g.15961807_15961809delAAC	chr17:g.15961803TAAC>T	NCOR1	LoF	p.V1997delV	V/-	1997	-	ENST00000268712	2441.0	46
50	Very high	PRCA	c.8876_8879delACTG	Frameshift	1297	predicted	TIER 1	62	chr11:g.108235834_108235837delACTG	chr11:g.108235831TTGAC>T	ATM	LoF	p.D2959Gfs*3	D/.	2959	+	ENST00000278616	3057.0	63
50	Very high	PRCA	c.7638_7646delTAGAATTTC	InFrameDeletion	651	predicted	TIER 2	52	chr11:g.108202614_108202622delTAGAATTTC	chr11:g.108202611CTCTAGAATT>C	ATM	LoF	p.R2547_S2549delRIS	RIS/-	2547	+	ENST00000278616	3057.0	63
50	Very high	PRCA	c.7480C>T	Nonsense	47	known	TIER 1	15	chr13:g.32930609C>T	chr13:g.32930609C>T	BRCA2	LoF	p.R2494*	R/*	2494	+	ENST00000380152	3419.0	27
50	Very high	PRCA	c.9286dupG	Frameshift	851	predicted	TIER 1	25	chr13:g.32968855dupG	chr13:g.32968854C>CG	BRCA2	LoF	p.E3096Gfs*15	E/.	3096	+	ENST00000380152	3419.0	27
50	Very high	PRCA	c.3805C>T	Nonsense	1855	predicted	TIER 2	32	chr8:g.69046332C>T	chr8:g.69046332C>T	PREX2	ambiguous	p.Q1269*	Q/*	1269	+	ENST00000288368	1607.0	40
50	Very high	PRCA	c.1494-1_1498delGAGATA	SpliceAcceptorDeletion	705	predicted	TIER 2	131414	chr8:g.68984729_68984734delGAGATA	chr8:g.68984725TATAGAG>T	PREX2	ambiguous	.	./.	.	+	ENST00000288368	1607.0	40
50	Very high	PRCA	c.851_853dupACA	InFrameInsertion	367	predicted	TIER 2	8	chr8:g.68956733_68956735dupACA	chr8:g.68956731G>GAAC	PREX2	ambiguous	p.N284dupN	-/N	284	+	ENST00000288368	1607.0	40
49	Very high	PRCA	c.13211_13228delAGGTGATTGATGAGCAGA	MultiAAMissense	4641	predicted	TIER 1	27	chr4:g.187510285_187510302delTCTGCTCATCAATCACCT	chr4:g.187510284GTCTGCTCATCAATCACCT>G	FAT1	LoF	p.E4404_T4410delinsA	insA/-	4404	-	ENST00000441802	4589.0	27
49	Very high	PRCA	c.8603G>A	Nonsense	1701	predicted	TIER 1	10	chr4:g.187539137C>T	chr4:g.187539137C>T	FAT1	LoF	p.W2868*	W/*	2868	-	ENST00000441802	4589.0	27
49	Very high	PRCA	c.14489_14490insTC	Frameshift	4059	predicted	TIER 1	46	chr12:g.49421818_49421819insAG	chr12:g.49421817T>TGA	MLL2	LoF	p.K4831Qfs*28	K/.	4831	-	ENST00000301067	5538.0	54
49	Very high	PRCA	c.9749C>G	Nonsense	1624	predicted	TIER 1	61	chr2:g.141215097G>C	chr2:g.141215097G>C	LRP1B	LoF	p.S3250*	S/*	3250	-	ENST00000389484	4600.0	91
49	Very high	PRCA	c.8439_8441delAAA	InFrameDeletion	2073	predicted	TIER 2	16	chr5:g.112179730_112179732delAAA	chr5:g.112179729CAAA>C	APC	LoF	p.K2815delK	K/-	2815	+	ENST00000257430	2844.0	16
49	Very high	PRCA	c.6586_6587insT	Frameshift	1546	predicted	TIER 1	16	chr5:g.112177877_112177878insT	chr5:g.112177877A>AT	APC	LoF	p.K2196Ifs*11	K/.	2196	+	ENST00000257430	2844.0	16
49	Very high	PRCA	c.6944_6947delTAAA	Frameshift	4835	predicted	TIER 1	13	chr13:g.32920970_32920973delTAAA	chr13:g.32920967CAATA>C	BRCA2	LoF	p.I2315Kfs*12	I/.	2315	+	ENST00000380152	3419.0	27
49	Very high	PRCA	c.6673_6703dupACAGAAGCAGTAGAAATTGCTAAAGCTTTTA	Frameshift	4693	predicted	TIER 1	11	chr13:g.32915165_32915195dupACAGAAGCAGTAGAAATTGCTAAAGCTTTTA	chr13:g.32915163A>AAACAGAAGCAGTAGAAATTGCTAAAGCTTTT	BRCA2	LoF	p.M2235Nfs*8	M/.	2235	+	ENST00000380152	3419.0	27
49	Very high	PRCA	c.2891_2893delAGA	InFrameDeletion	4865	predicted	TIER 2	17	chr3:g.89528591_89528593delAGA	chr3:g.89528584CAGA>C	EPHA3	ambiguous	p.K964delK	K/-	964	+	ENST00000336596	984.0	17
49	Very high	PRCA	c.1893_1901delTGAATGCCA	InFrameDeletion	4688	predicted	TIER 2	6	chr6:g.106554365_106554373delTGAATGCCA	chr6:g.106554362ACATGAATGC>A	PRDM1	LoF	p.H631_C633delHEC	HEC/-	631	+	ENST00000369096	826.0	7
49	Very high	PRCA	c.3382C>T	Nonsense	1580	predicted	TIER 2	27	chr8:g.69030840C>T	chr8:g.69030840C>T	PREX2	ambiguous	p.Q1128*	Q/*	1128	+	ENST00000288368	1607.0	40
49	Very high	PRCA	c.3121delG	Frameshift	1463	predicted	TIER 2	25	chr8:g.69021833delG	chr8:g.69021831TG>T	PREX2	ambiguous	p.E1041Rfs*7	E/.	1041	+	ENST00000288368	1607.0	40
49	Very high	PRCA	c.10121_10129dupTCGGTCAGC	InFrameInsertion	694	predicted	TIER 2	12	chr1:g.16263752_16263760dupTCGGTCAGC	chr1:g.16263747C>CCAGCTCGGT	SPEN	ambiguous	p.L3374_Q3376dupLGQ	-/LGQ	3374	+	ENST00000375759	3665.0	15
48	Very high	PRCA	c.8323C>T	Nonsense	1782	predicted	TIER 1	10	chr4:g.187539417G>A	chr4:g.187539417G>A	FAT1	LoF	p.Q2775*	Q/*	2775	-	ENST00000441802	4589.0	27
48	Very high	PRCA	c.8110C>T	Nonsense	2459	predicted	TIER 1	50	chr2:g.141274497G>A	chr2:g.141274497G>A	LRP1B	LoF	p.Q2704*	Q/*	2704	-	ENST00000389484	4600.0	91
48	Very high	PRCA	c.4973C>G	Nonsense	3383	predicted	TIER 1	8	chr3:g.47142990G>C	chr3:g.47142990G>C	SETD2	LoF	p.S1658*	S/*	1658	-	ENST00000409792	2565.0	21
48	Very high	PRCA	c.8356_8357delTC	Frameshift	1438	predicted	TIER 1	9	chr16:g.72828227_72828228delAG	chr16:g.72828223TGA>T	ZFHX3	LoF	p.S2786Tfs*4	S/.	2786	-	ENST00000268489	3704.0	10
48	Very high	PRCA	c.9459_9488delTCTGCCCAGCACAACTGTTCCTTCCCCTGG	InFrameDeletion	1095	predicted	TIER 2	10	chr16:g.72822689_72822718delAGGGGAAGGAACAGTTGTGCTGGGCAGACC	chr16:g.72822686GCCAGGGGAAGGAACAGTTGTGCTGGGCAGA>G	ZFHX3	LoF	p.S3156_P3165delSTTVPSPGLP	STTVPSPGLP/-	3156	-	ENST00000268489	3704.0	10
48	Very high	PRCA	c.9629_9691delCTCCCCCGCCGCCAGCAGCCCAGCCGCCACCCACACCACAGCTCCCACTGCAACAGCAGCAGC	InFrameDeletion	992	predicted	TIER 2	10	chr16:g.72822492_72822554delTGTTGCAGTGGGAGCTGTGGTGTGGGTGGCGGCTGGGCTGCTGGCGGCGGGGGAGGCTGCTGC	chr16:g.72822483TGCTGCTGCTGTTGCAGTGGGAGCTGTGGTGTGGGTGGCGGCTGGGCTGCTGGCGGCGGGGGAG>T	ZFHX3	LoF	p.P3210_Q3230delPPPPPAAQPPPTPQLPLQQQQ	PPPPPAAQPPPTPQLPLQQQQ/-	3210	-	ENST00000268489	3704.0	10
48	Very high	PRCA	c.7913G>A	Nonsense	750	known	TIER 1	53	chr11:g.108203613G>A	chr11:g.108203613G>A	ATM	LoF	p.W2638*	W/*	2638	+	ENST00000278616	3057.0	63
48	Very high	PRCA	c.8814_8824delGAGAAACTCTC	Frameshift	1230	predicted	TIER 1	61	chr11:g.108225565_108225575delGAGAAACTCTC	chr11:g.108225564TGAGAAACTCTC>T	ATM	LoF	p.M2938Ifs*14	M/.	2938	+	ENST00000278616	3057.0	63
48	Very high	PRCA	c.8395_8404delTTTCAGTGCC	Frameshift	1014	predicted	TIER 1	57	chr11:g.108214075_108214084delTTTCAGTGCC	chr11:g.108214064ATTTCAGTGCC>A	ATM	LoF	p.F2799Kfs*4	F/.	2799	+	ENST00000278616	3057.0	63
48	Very high	PRCA	c.7495_7498delGAAG	Frameshift	550	predicted	TIER 1	50	chr11:g.108201128_108201131delGAAG	chr11:g.108201127TGAAG>T	ATM	LoF	p.E2499Sfs*4	E/.	2499	+	ENST00000278616	3057.0	63
48	Very high	PRCA	c.6529C>T	Nonsense	172	predicted	TIER 1	45	chr11:g.108192104C>T	chr11:g.108192104C>T	ATM	LoF	p.Q2177*	Q/*	2177	+	ENST00000278616	3057.0	63
48	Very high	PRCA	c.6404_6405insTT	Nonsense	103	predicted	TIER 1	44	chr11:g.108190737_108190738insTT	chr11:g.108190736C>CTT	ATM	LoF	p.R2136*fs*1	R/.	2136	+	ENST00000278616	3057.0	63
[truncated: 15,534 more rows]

## Sheet: ST4
Supplementary Table 4. Allele frequencies of BRCA oncogenic variants in diverse human populations
[truncated: 18,513 more rows]
[truncated: 30 more columns]

[truncated: 11 more sheets: ST5, ST6, ST7, ST8, ST9, ST10, ST11, ST12, ST13, ST14, ST15]
